# Supplementary material for: Expression Profiling of Contralateral Dorsal Root Ganglia of a Rat Model of Complex Regional Pain Syndrome Type-i Uncovers Potential Mechanisms Involved in Mirror-image Painexpression Profiling of Contralateral Dorsal Root Ganglia of a Rat Model of Complex Regional Pain Syndrome Type-i Uncovers Potential Mechanisms Involved in Mirror-image Pain
Source: Research Square preprint supplement (doi:10.21203/rs.3.rs-532136/v1), 2021-05-26
Supplement: Supplementary file 1 [file 8581e98752f600c2324329ea.xlsx]

## Sheet: Sheet1
Gene ID	Gene Symbol	log2 (CPIP_DEG_left / Sham_DEG_left)	Pvalue(CPIP_DEG_left / Sham_DEG_left)	Qvalue (CPIP_DEG_left / Sham_DEG_left)
287408	Myh1	-5.39489	0	0
64543	Sec14l3	-0.679269	3.5456e-86	5.92332e-84
54232	Car3	-3.31451	0	0
25295	Bglap	-2.28801	1.2819e-82	2.06896e-80
316010	Camp	-0.781755	1.09014e-12	2.33804e-11
25627	Cma1	1.08192	4.80102e-07	5.01566e-06
307100	Calml3	-2.43788	1.39646e-06	1.35208e-05
287561	Ccl7	1.01027	9.08764e-09	1.23097e-07
353227	Zbtb16	0.614271	4.32252e-28	2.29951e-26
498335	Cxcl13	1.38177	1.02833e-33	6.57196e-32
291245	Actn2	-3.22145	1.22855e-119	2.78545e-117
117505	Csrp3	-2.7726	2.27076e-15	6.20469e-14
315962	Ky	-1.28134	3.54881e-16	1.01482e-14
315833	Klhl31	-4.20656	7.1908e-81	1.12253e-78
24583	Myh3	-1.5939	5.97804e-14	1.46527e-12
113918	Slc6a20	0.905045	6.92541e-43	5.63652e-41
246266	Aspg	0.765836	3.30235e-07	3.55932e-06
316740	Myom1	-2.209	1.16531e-49	1.12087e-47
289178	Dpt	-0.710334	9.75545e-18	3.12782e-16
310694	Fcrl2	-0.868573	7.35122e-06	6.19486e-05
59299	Trdn	-3.56732	1.1054e-146	3.14214e-144
25028	Ampd1	-4.77341	1.81499e-95	3.29204e-93
116601	Atp2a1	-5.23013	0	0
306356	Cilp2	-1.99731	1.14215e-08	1.52755e-07
66021	Cybb	0.717021	3.62119e-13	8.08506e-12
362018	Sypl2	-4.14196	2.87566e-62	3.57954e-60
56781	Myl1	-6.01835	0	0
58968	Acan	-3.36343	2.14588e-87	3.68183e-85
289337	Tlr5	1.3812	8.2314e-18	2.65257e-16
50565	Hspb7	-0.918697	1.28769e-09	1.95722e-08
25383	Apobec1	0.703702	5.3752e-08	6.51212e-07
499146	Spib	-0.740149	7.62821e-09	1.04367e-07
24617	Serpine1	0.902676	2.11917e-23	9.02899e-22
689008	Fbn2	0.845692	1.47016e-14	3.77857e-13
171055	Cd79b	-0.734272	3.63059e-05	0.000266145
79451	Fabp4	-1.93906	1.85403e-55	1.98371e-53
292594	Lilrb4	0.973149	1.2072e-06	1.18146e-05
299699	Aldh1l2	0.632582	5.17574e-05	0.000367121
308622	Txlnb	-6.18713	4.76649e-36	3.36214e-34
81687	Mmp9	-1.31189	8.92504e-30	5.01408e-28
25278	Cox6a2	-4.63812	1.15204e-108	2.38485e-106
690955	Lilrb3b	0.895236	3.7608e-10	6.09052e-09
362867	Mybpc1	-4.22105	9.93271e-308	5.40481e-305
84396	Atp1b4	-2.58227	7.44228e-05	0.000509392
686019	Casq1	-3.13107	5.6398e-261	2.61975e-258
308873	Art1	-4.59861	4.50619e-18	1.47458e-16
292401	Smoc2	0.883278	5.45725e-73	7.64216e-71
311252	Pamr1	0.593997	6.30165e-12	1.24885e-10
64552	Mpeg1	0.682384	6.84381e-52	6.86002e-50
499322	Fam111a	2.23165	2.02968e-81	3.22127e-79
307414	MGC108823	0.591901	1.82865e-07	2.04142e-06
192203	Fap	0.937105	4.31434e-13	9.59891e-12
304021	Col8a1	0.686845	6.32389e-25	2.91618e-23
100360880	Fosb	2.45322	8.98202e-100	1.7279e-97
291555	Atp8b1	0.922867	1.23989e-11	2.37802e-10
303413	Mpo	-0.822733	1.67801e-14	4.29539e-13
297339	Capg	-1.46306	1.16173e-263	5.67312e-261
304913	Tnn	-1.76284	5.51941e-06	4.77155e-05
25661	Fn1	1.16325	0	0
171052	Mmp13	-0.671039	8.16124e-18	2.63442e-16
360730	Ostn	-4.16723	2.58741e-05	0.000195855
311098	Xirp2	-3.64116	3.47784e-232	1.40926e-229
691644	Myh2	-7.02013	0	0
287411	Dhrs7c	-4.52087	1.98352e-27	1.02653e-25
291605	Myot	-8.32104	3.06952e-34	2.01582e-32
24584	Mylpf	-5.34165	0	0
362431	Clec4a3	0.700255	7.41751e-08	8.82916e-07
114108	Pdlim3	-1.87387	7.44656e-46	6.41718e-44
307982	Nrap	-4.39226	3.27733e-122	7.52008e-120
361821	Col6a2	0.633438	2.31528e-181	7.60251e-179
29389	Tnni2	-5.59009	0	0
365298	Alpk3	-1.68998	7.06014e-25	3.24783e-23
54242	Cpa3	1.89993	5.77126e-31	3.38196e-29
25708	Ucp3	-5.87995	1.37984e-15	3.84196e-14
84387	Pglyrp1	-0.894945	1.19514e-05	9.67749e-05
298795	LOC298795	-2.08969	1.92503e-05	0.000149094
89829	Socs3	0.747764	2.82876e-23	1.19719e-21
298579	Pla2g2d	0.862891	7.69452e-10	1.20512e-08
682930	Cacna1s	-3.71682	1.32109e-106	2.70539e-104
56824	Ifit1	-2.30146	1.54439e-09	2.32512e-08
117029	Ccr5	0.721805	2.75982e-11	5.11789e-10
25629	Plin1	-1.72429	8.31147e-10	1.29641e-08
679975	Gpr183	0.656802	4.21944e-05	0.000305433
306748	Cxcl14	1.69757	5.58164e-67	7.33119e-65
25438	Eno3	-2.72623	0	0
360543	Myh4	-5.22301	0	0
25021	Itgam	0.743518	9.0324e-12	1.76796e-10
315039	Osr2	0.725954	2.25728e-11	4.21469e-10
25412	Col2a1	-1.66991	0	0
362282	Pck1	-3.14863	4.4902e-28	2.38206e-26
60333	Msln	3.20023	1.58026e-76	2.33303e-74
292879	Mybpc2	-4.4193	0	0
59108	Mb	-7.24523	0	0
316632	Ndufa10l1	-0.708673	4.6211e-60	5.60565e-58
24838	Tnnt3	-5.10245	0	0
171009	Actn3	-4.49874	0	0
27064	Ankrd1	-2.80466	7.51187e-16	2.11632e-14
316330	Ankrd23	-4.56578	2.07841e-235	8.60507e-233
554353	Gpr34	0.62227	3.01154e-05	0.000225274
60423	Slc28a2	0.601222	1.96954e-09	2.92361e-08
303856	Atp13a5	0.924691	5.95707e-05	0.000416645
308099	Fndc1	1.08919	5.10987e-97	9.35745e-95
291084	Nqo2	-1.18595	1.58238e-59	1.89538e-57
296369	Tnnc2	-5.91177	0	0
500292	Cidec	-1.58227	3.33983e-07	3.58956e-06
25365	Actg2	-1.77068	1.61664e-24	7.27868e-23
317181	Srpx2	0.664697	4.37193e-06	3.85836e-05
362708	Trim54	-2.47843	5.81011e-20	2.05676e-18
24701	Pygm	-2.80484	0	0
679149	LOC679149	3.51049	7.86975e-06	6.58521e-05
246253	Adipoq	-2.45674	2.1049e-34	1.39679e-32
299606	Elane	-1.17788	2.01544e-06	1.89738e-05
301026	Ngp	-0.78191	4.29474e-37	3.1459e-35
100360872	Mcpt1l1	1.35785	1.38935e-50	1.37099e-48
117558	Mylk2	-3.85679	1.04412e-99	1.98853e-97
500453	Pax5	-1.91484	8.66164e-05	0.00058352
498440	Myoz1	-5.06562	3.48045e-227	1.38094e-224
24265	Ckm	-5.50914	0	0
287122	Rpl3l	-2.6329	4.21877e-27	2.15985e-25
81639	Alox15	-0.821208	3.84087e-09	5.5207e-08
25250	Cox8b	-3.49373	1.00757e-16	3.00772e-15
683463	Lilrb3a	-0.719488	0.000108815	0.000716837
316137	Adgre1	0.856659	2.06874e-36	1.48117e-34
296345	Jph2	-2.06903	3.72981e-49	3.53404e-47
301226	Apobec2	-2.41721	5.89813e-28	3.12027e-26
688459	LOC688459	-0.795673	1.74233e-05	0.000136106
309772	Vgll2	-4.8302	1.02807e-14	2.66389e-13
29437	Acta1	-4.57484	0	0
295279	Fcgr1a	0.745987	6.34544e-12	1.25623e-10
684440	Tlr8	0.815066	3.87849e-09	5.56637e-08
