# Supplementary material for: Expression Profiling of Contralateral Dorsal Root Ganglia of a Rat Model of Complex Regional Pain Syndrome Type-i Uncovers Potential Mechanisms Involved in Mirror-image Painexpression Profiling of Contralateral Dorsal Root Ganglia of a Rat Model of Complex Regional Pain Syndrome Type-i Uncovers Potential Mechanisms Involved in Mirror-image Pain
Source: Research Square preprint supplement (doi:10.21203/rs.3.rs-532136/v1), 2021-05-26
Supplement: Supplementary file 2 [file e34d773069941d340c2118df.xlsx]

## Sheet: Upregulated
	Gene ID	Gene Symbol	Type	kegg_pathway_term	KEGG Pathway Term Level1	KEGG Pathway Term Level2	log2 (CPIP_DEG_left / Sham_DEG_left)	Pvalue(CPIP_DEG_left / Sham_DEG_left)	Qvalue (CPIP_DEG_left / Sham_DEG_left)
Complement and coagulation cascades
	103689965	LOC103689965	mRNA	04610///Complement and coagulation cascades	Organismal Systems	Immune system	0.626995	3.02948e-33	1.91683e-31
	192262	C1s	mRNA	04610///Complement and coagulation cascades	Organismal Systems	Immune system	0.89992	5.15947e-243	2.28516e-240
	24231	C2	mRNA	04610///Complement and coagulation cascades	Organismal Systems	Immune system	0.785237	2.50159e-54	2.6322e-52
	24233	C4a	mRNA	04610///Complement and coagulation cascades	Organismal Systems	Immune system	0.673382	2.10792e-31	1.26642e-29
	24237	C6	mRNA	04610///Complement and coagulation cascades	Organismal Systems	Immune system	0.916279	5.19556e-12	1.03721e-10
	24617	Serpine1	mRNA	04218///Cellular senescence+++04066///HIF-1 signaling pathway+++04115///p53 signaling pathway+++04610///Complement and coagulation cascades+++04390///Hippo signaling pathway+++04371///Apelin signaling pathway	Organismal Systems+++Cellular Processes+++Environmental Information Processing	Cell growth and death+++Immune system+++Signal transduction	0.902676	2.11917e-23	9.02899e-22
	25021	Itgam	mRNA	04640///Hematopoietic cell lineage+++04514///Cell adhesion molecules (CAMs)+++04145///Phagosome+++04810///Regulation of actin cytoskeleton+++04015///Rap1 signaling pathway+++04610///Complement and coagulation cascades+++04670///Leukocyte transendothelial migration	Organismal Systems+++Cellular Processes+++Environmental Information Processing	Transport and catabolism+++Signaling molecules and interaction+++Cell motility+++Immune system+++Signal transduction	0.743518	9.0324e-12	1.76796e-10
	294257	Cfb	mRNA	04610///Complement and coagulation cascades	Organismal Systems	Immune system	0.734606	4.76415e-12	9.55086e-11
	295703	Serping1	mRNA	04610///Complement and coagulation cascades	Organismal Systems	Immune system	0.607832	2.86446e-177	9.24639e-175
	298566	C1qa	mRNA	04610///Complement and coagulation cascades	Organismal Systems	Immune system	0.632217	2.21555e-31	1.32689e-29
	499271	Itgax	mRNA	04810///Regulation of actin cytoskeleton+++04610///Complement and coagulation cascades	Cellular Processes+++Organismal Systems	Cell motility+++Immune system	0.71493	4.0675e-06	3.61145e-05
	60327	F13a1	mRNA	04610///Complement and coagulation cascades	Organismal Systems	Immune system	0.808412	1.48339e-24	6.71049e-23
	84007	C3ar1	mRNA	04080///Neuroactive ligand-receptor interaction+++04610///Complement and coagulation cascades	Organismal Systems+++Environmental Information Processing	Signaling molecules and interaction+++Immune system	1.03583	7.46969e-15	1.95144e-13
Phagosome
	100364500	LOC100364500	mRNA	04514///Cell adhesion molecules (CAMs)+++04145///Phagosome+++04144///Endocytosis+++04218///Cellular senescence+++04612///Antigen processing and presentation	Organismal Systems+++Cellular Processes+++Environmental Information Processing	Cell growth and death+++Transport and catabolism+++Signaling molecules and interaction+++Immune system	0.73547	7.19817e-21	2.68276e-19
	100909441	LOC100909441	mRNA	04145///Phagosome+++04540///Gap junction+++04530///Tight junction+++04210///Apoptosis	Cellular Processes	Cell growth and death+++Transport and catabolism+++Cellular community - eukaryotes	0.809677	2.31887e-105	4.69817e-103
	103690020	LOC103690020	mRNA	04640///Hematopoietic cell lineage+++04145///Phagosome+++04512///ECM-receptor interaction+++04920///Adipocytokine signaling pathway+++04975///Fat digestion and absorption+++03320///PPAR signaling pathway+++04152///AMPK signaling pathway+++04979///Cholesterol metabolism	Cellular Processes+++Organismal Systems+++Environmental Information Processing	Transport and catabolism+++Digestive system+++Signaling molecules and interaction+++Endocrine system+++Immune system+++Signal transduction	0.944258	1.53386e-05	0.000121163
	103690108	LOC103690108	mRNA	04514///Cell adhesion molecules (CAMs)+++04145///Phagosome+++04144///Endocytosis+++04218///Cellular senescence+++04612///Antigen processing and presentation	Organismal Systems+++Cellular Processes+++Environmental Information Processing	Cell growth and death+++Transport and catabolism+++Signaling molecules and interaction+++Immune system	0.848043	2.65183e-144	7.42708e-142
	108348047	LOC108348047	mRNA	04650///Natural killer cell mediated cytotoxicity+++04145///Phagosome+++04611///Platelet activation+++04666///Fc gamma R-mediated phagocytosis+++04380///Osteoclast differentiation	Organismal Systems+++Cellular Processes	Transport and catabolism+++Immune system+++Development	0.880365	5.4347e-21	2.04958e-19
	25021	Itgam	mRNA	04640///Hematopoietic cell lineage+++04514///Cell adhesion molecules (CAMs)+++04145///Phagosome+++04810///Regulation of actin cytoskeleton+++04015///Rap1 signaling pathway+++04610///Complement and coagulation cascades+++04670///Leukocyte transendothelial migration	Organismal Systems+++Cellular Processes+++Environmental Information Processing	Transport and catabolism+++Signaling molecules and interaction+++Cell motility+++Immune system+++Signal transduction	0.743518	9.0324e-12	1.76796e-10
	29220	Thbs4	mRNA	04145///Phagosome+++04510///Focal adhesion+++04512///ECM-receptor interaction+++04151///PI3K-Akt signaling pathway	Cellular Processes+++Environmental Information Processing	Transport and catabolism+++Cellular community - eukaryotes+++Signaling molecules and interaction+++Signal transduction	1.15146	0	0
	292406	Thbs2	mRNA	04145///Phagosome+++04510///Focal adhesion+++04512///ECM-receptor interaction+++04151///PI3K-Akt signaling pathway	Cellular Processes+++Environmental Information Processing	Transport and catabolism+++Cellular community - eukaryotes+++Signaling molecules and interaction+++Signal transduction	0.705935	1.33968e-75	1.96264e-73
	295279	Fcgr1a	mRNA	04640///Hematopoietic cell lineage+++04145///Phagosome+++04666///Fc gamma R-mediated phagocytosis+++04380///Osteoclast differentiation	Organismal Systems+++Cellular Processes	Transport and catabolism+++Immune system+++Development	0.745987	6.34544e-12	1.25623e-10
	304966	Fcgr3a	mRNA	04145///Phagosome+++04650///Natural killer cell mediated cytotoxicity+++04380///Osteoclast differentiation	Organismal Systems+++Cellular Processes	Transport and catabolism+++Immune system+++Development	0.815066	3.12232e-05	0.000232738
	361289	Colec12	mRNA	04145///Phagosome	Cellular Processes	Transport and catabolism	0.632999	3.54362e-22	1.41189e-20
	445442	Thbs1	mRNA	04145///Phagosome+++04510///Focal adhesion+++04512///ECM-receptor interaction+++04015///Rap1 signaling pathway+++04115///p53 signaling pathway+++04350///TGF-beta signaling pathway+++04151///PI3K-Akt signaling pathway	Cellular Processes+++Environmental Information Processing	Cell growth and death+++Transport and catabolism+++Cellular community - eukaryotes+++Signaling molecules and interaction+++Signal transduction	0.64886	5.43632e-30	3.07225e-28
	498638	Msr1	mRNA	04145///Phagosome	Cellular Processes	Transport and catabolism	0.718272	1.76824e-13	4.09188e-12
	66021	Cybb	mRNA	04217///Necroptosis+++04621///NOD-like receptor signaling pathway+++04145///Phagosome+++04216///Ferroptosis+++04066///HIF-1 signaling pathway+++04670///Leukocyte transendothelial migration	Organismal Systems+++Cellular Processes+++Environmental Information Processing	Cell growth and death+++Transport and catabolism+++Immune system+++Signal transduction	0.717021	3.62119e-13	8.08506e-12
	684969	Potef	mRNA	04714///Thermogenesis+++04921///Oxytocin signaling pathway+++04145///Phagosome+++04510///Focal adhesion+++04810///Regulation of actin cytoskeleton+++04611///Platelet activation+++04015///Rap1 signaling pathway+++04919///Thyroid hormone signaling pathway+++04520///Adherens junction+++04530///Tight junction+++04210///Apoptosis+++04390///Hippo signaling pathway+++04745///Phototransduction - fly+++04…	Organismal Systems+++Cellular Processes+++Environmental Information Processing	Cell growth and death+++Sensory system+++Transport and catabolism+++Cellular community - eukaryotes+++Endocrine system+++Cell motility+++Immune system+++Signal transduction+++Environmental adaptation	6.28587	9.69124e-11	1.67943e-09
Osteoclast differentiation
	100360880	Fosb	mRNA	04657///IL-17 signaling pathway+++04380///Osteoclast differentiation	Organismal Systems	Immune system+++Development	2.45322	8.98202e-100	1.7279e-97
	102547294	Iqcn	mRNA	04657///IL-17 signaling pathway+++04010///MAPK signaling pathway+++04928///Parathyroid hormone synthesis, secretion and action+++04380///Osteoclast differentiation	Organismal Systems+++Environmental Information Processing	Endocrine system+++Immune system+++Signal transduction+++Development	1.03832	0.000117484	0.000768897
	108348047	LOC108348047	mRNA	04650///Natural killer cell mediated cytotoxicity+++04145///Phagosome+++04611///Platelet activation+++04666///Fc gamma R-mediated phagocytosis+++04380///Osteoclast differentiation	Organismal Systems+++Cellular Processes	Transport and catabolism+++Immune system+++Development	0.880365	5.4347e-21	2.04958e-19
	292594	Lilrb4	mRNA	04380///Osteoclast differentiation	Organismal Systems	Development	0.973149	1.2072e-06	1.18146e-05
	295279	Fcgr1a	mRNA	04640///Hematopoietic cell lineage+++04145///Phagosome+++04666///Fc gamma R-mediated phagocytosis+++04380///Osteoclast differentiation	Organismal Systems+++Cellular Processes	Transport and catabolism+++Immune system+++Development	0.745987	6.34544e-12	1.25623e-10
	301227	Trem2	mRNA	04380///Osteoclast differentiation	Organismal Systems	Development	0.752101	2.23713e-11	4.18117e-10
	304966	Fcgr3a	mRNA	04145///Phagosome+++04650///Natural killer cell mediated cytotoxicity+++04380///Osteoclast differentiation	Organismal Systems+++Cellular Processes	Transport and catabolism+++Immune system+++Development	0.815066	3.12232e-05	0.000232738
	308350	Lilrb3	mRNA	04380///Osteoclast differentiation	Organismal Systems	Development	0.782728	1.24469e-05	0.000100233
	685590	LOC685590	mRNA	04213///Longevity regulating pathway - multiple species+++04660///T cell receptor signaling pathway+++04012///ErbB signaling pathway+++04625///C-type lectin receptor signaling pathway+++04750///Inflammatory mediator regulation of TRP channels+++04650///Natural killer cell mediated cytotoxicity+++04917///Prolactin signaling pathway+++04150///mTOR signaling pathway+++04914///Progesterone-mediated o…	Cellular Processes+++Organismal Systems+++Environmental Information Processing+++Metabolism	Nervous system+++Excretory system+++Cell growth and death+++Sensory system+++Transport and catabolism+++Digestive system+++Cellular community - eukaryotes+++Aging+++Endocrine system+++Cell motility+++Immune system+++Signal transduction+++Development+++Carbohydrate metabolism	0.869374	1.13794e-06	1.11885e-05
	690955	Lilrb3b	mRNA	04380///Osteoclast differentiation	Organismal Systems	Development	0.895236	3.7608e-10	6.09052e-09
	89829	Socs3	mRNA	04917///Prolactin signaling pathway+++04668///TNF signaling pathway+++04630///Jak-STAT signaling pathway+++04920///Adipocytokine signaling pathway+++04120///Ubiquitin mediated proteolysis+++04910///Insulin signaling pathway+++04380///Osteoclast differentiation	Genetic Information Processing+++Organismal Systems+++Environmental Information Processing	Endocrine system+++Signal transduction+++Development+++Folding, sorting and degradation	0.747764	2.82876e-23	1.19719e-21
ECM-receptor interaction
	103690020	LOC103690020	mRNA	04640///Hematopoietic cell lineage+++04145///Phagosome+++04512///ECM-receptor interaction+++04920///Adipocytokine signaling pathway+++04975///Fat digestion and absorption+++03320///PPAR signaling pathway+++04152///AMPK signaling pathway+++04979///Cholesterol metabolism	Cellular Processes+++Organismal Systems+++Environmental Information Processing	Transport and catabolism+++Digestive system+++Signaling molecules and interaction+++Endocrine system+++Immune system+++Signal transduction	0.944258	1.53386e-05	0.000121163
	25661	Fn1	mRNA	04510///Focal adhesion+++04810///Regulation of actin cytoskeleton+++04512///ECM-receptor interaction+++04151///PI3K-Akt signaling pathway	Cellular Processes+++Environmental Information Processing	Cellular community - eukaryotes+++Signaling molecules and interaction+++Cell motility+++Signal transduction	1.16325	0	0
	29220	Thbs4	mRNA	04145///Phagosome+++04510///Focal adhesion+++04512///ECM-receptor interaction+++04151///PI3K-Akt signaling pathway	Cellular Processes+++Environmental Information Processing	Transport and catabolism+++Cellular community - eukaryotes+++Signaling molecules and interaction+++Signal transduction	1.15146	0	0
	292406	Thbs2	mRNA	04145///Phagosome+++04510///Focal adhesion+++04512///ECM-receptor interaction+++04151///PI3K-Akt signaling pathway	Cellular Processes+++Environmental Information Processing	Transport and catabolism+++Cellular community - eukaryotes+++Signaling molecules and interaction+++Signal transduction	0.705935	1.33968e-75	1.96264e-73
	315979	Col6a6	mRNA	04974///Protein digestion and absorption+++04510///Focal adhesion+++04512///ECM-receptor interaction+++04151///PI3K-Akt signaling pathway	Organismal Systems+++Cellular Processes+++Environmental Information Processing	Digestive system+++Cellular community - eukaryotes+++Signaling molecules and interaction+++Signal transduction	0.643573	2.36626e-38	1.76727e-36
	361821	Col6a2	mRNA	04974///Protein digestion and absorption+++04510///Focal adhesion+++04512///ECM-receptor interaction+++04151///PI3K-Akt signaling pathway	Organismal Systems+++Cellular Processes+++Environmental Information Processing	Digestive system+++Cellular community - eukaryotes+++Signaling molecules and interaction+++Signal transduction	0.633438	2.31528e-181	7.60251e-179
	445442	Thbs1	mRNA	04145///Phagosome+++04510///Focal adhesion+++04512///ECM-receptor interaction+++04015///Rap1 signaling pathway+++04115///p53 signaling pathway+++04350///TGF-beta signaling pathway+++04151///PI3K-Akt signaling pathway	Cellular Processes+++Environmental Information Processing	Cell growth and death+++Transport and catabolism+++Cellular community - eukaryotes+++Signaling molecules and interaction+++Signal transduction	0.64886	5.43632e-30	3.07225e-28
Protein digestion and absorption
	25253	Dpp4	mRNA	04974///Protein digestion and absorption	Organismal Systems	Digestive system	1.03695	2.09792e-45	1.77578e-43
	29132	Atp1a4	mRNA	04918///Thyroid hormone synthesis+++04974///Protein digestion and absorption+++04964///Proximal tubule bicarbonate reclamation+++04978///Mineral absorption+++04971///Gastric acid secretion+++04261///Adrenergic signaling in cardiomyocytes+++04960///Aldosterone-regulated sodium reabsorption+++04925///Aldosterone synthesis and secretion+++04970///Salivary secretion+++04961///Endocrine and other fact…	Organismal Systems+++Environmental Information Processing	Excretory system+++Digestive system+++Endocrine system+++Circulatory system+++Signal transduction	0.89658	1.62998e-05	0.00012796
	301012	Col7a1	mRNA	04974///Protein digestion and absorption	Organismal Systems	Digestive system	1.27953	4.8337e-12	9.66993e-11
	315979	Col6a6	mRNA	04974///Protein digestion and absorption+++04510///Focal adhesion+++04512///ECM-receptor interaction+++04151///PI3K-Akt signaling pathway	Organismal Systems+++Cellular Processes+++Environmental Information Processing	Digestive system+++Cellular community - eukaryotes+++Signaling molecules and interaction+++Signal transduction	0.643573	2.36626e-38	1.76727e-36
	361821	Col6a2	mRNA	04974///Protein digestion and absorption+++04510///Focal adhesion+++04512///ECM-receptor interaction+++04151///PI3K-Akt signaling pathway	Organismal Systems+++Cellular Processes+++Environmental Information Processing	Digestive system+++Cellular community - eukaryotes+++Signaling molecules and interaction+++Signal transduction	0.633438	2.31528e-181	7.60251e-179
	54242	Cpa3	mRNA	04974///Protein digestion and absorption+++04614///Renin-angiotensin system+++04972///Pancreatic secretion	Organismal Systems	Digestive system+++Endocrine system	1.89993	5.77126e-31	3.38196e-29
	94341	Kcnj13	mRNA	04974///Protein digestion and absorption	Organismal Systems	Digestive system	0.646	2.90659e-07	3.16139e-06
Focal adhesion
	24329	Egfr	mRNA	04012///ErbB signaling pathway+++04020///Calcium signaling pathway+++04921///Oxytocin signaling pathway+++04926///Relaxin signaling pathway+++04320///Dorso-ventral axis formation+++04214///Apoptosis - fly+++04915///Estrogen signaling pathway+++04144///Endocytosis+++04510///Focal adhesion+++04810///Regulation of actin cytoskeleton+++04540///Gap junction+++04630///Jak-STAT signaling pathway+++04010…	Organismal Systems+++Cellular Processes+++Environmental Information Processing	Cell growth and death+++Transport and catabolism+++Cellular community - eukaryotes+++Endocrine system+++Cell motility+++Signal transduction+++Development	0.596643	4.73832e-29	2.58571e-27
	25661	Fn1	mRNA	04510///Focal adhesion+++04810///Regulation of actin cytoskeleton+++04512///ECM-receptor interaction+++04151///PI3K-Akt signaling pathway	Cellular Processes+++Environmental Information Processing	Cellular community - eukaryotes+++Signaling molecules and interaction+++Cell motility+++Signal transduction	1.16325	0	0
	29220	Thbs4	mRNA	04145///Phagosome+++04510///Focal adhesion+++04512///ECM-receptor interaction+++04151///PI3K-Akt signaling pathway	Cellular Processes+++Environmental Information Processing	Transport and catabolism+++Cellular community - eukaryotes+++Signaling molecules and interaction+++Signal transduction	1.15146	0	0
	292406	Thbs2	mRNA	04145///Phagosome+++04510///Focal adhesion+++04512///ECM-receptor interaction+++04151///PI3K-Akt signaling pathway	Cellular Processes+++Environmental Information Processing	Transport and catabolism+++Cellular community - eukaryotes+++Signaling molecules and interaction+++Signal transduction	0.705935	1.33968e-75	1.96264e-73
	315979	Col6a6	mRNA	04974///Protein digestion and absorption+++04510///Focal adhesion+++04512///ECM-receptor interaction+++04151///PI3K-Akt signaling pathway	Organismal Systems+++Cellular Processes+++Environmental Information Processing	Digestive system+++Cellular community - eukaryotes+++Signaling molecules and interaction+++Signal transduction	0.643573	2.36626e-38	1.76727e-36
	361821	Col6a2	mRNA	04974///Protein digestion and absorption+++04510///Focal adhesion+++04512///ECM-receptor interaction+++04151///PI3K-Akt signaling pathway	Organismal Systems+++Cellular Processes+++Environmental Information Processing	Digestive system+++Cellular community - eukaryotes+++Signaling molecules and interaction+++Signal transduction	0.633438	2.31528e-181	7.60251e-179
	445442	Thbs1	mRNA	04145///Phagosome+++04510///Focal adhesion+++04512///ECM-receptor interaction+++04015///Rap1 signaling pathway+++04115///p53 signaling pathway+++04350///TGF-beta signaling pathway+++04151///PI3K-Akt signaling pathway	Cellular Processes+++Environmental Information Processing	Cell growth and death+++Transport and catabolism+++Cellular community - eukaryotes+++Signaling molecules and interaction+++Signal transduction	0.64886	5.43632e-30	3.07225e-28
	64033	Ccnd2	mRNA	04917///Prolactin signaling pathway+++04340///Hedgehog signaling pathway+++04310///Wnt signaling pathway+++04510///Focal adhesion+++04218///Cellular senescence+++04630///Jak-STAT signaling pathway+++04115///p53 signaling pathway+++04390///Hippo signaling pathway+++04068///FoxO signaling pathway+++04151///PI3K-Akt signaling pathway+++04110///Cell cycle	Organismal Systems+++Cellular Processes+++Environmental Information Processing	Cell growth and death+++Cellular community - eukaryotes+++Endocrine system+++Signal transduction	0.65078	1.31417e-12	2.77477e-11
	684969	Potef	mRNA	04714///Thermogenesis+++04921///Oxytocin signaling pathway+++04145///Phagosome+++04510///Focal adhesion+++04810///Regulation of actin cytoskeleton+++04611///Platelet activation+++04015///Rap1 signaling pathway+++04919///Thyroid hormone signaling pathway+++04520///Adherens junction+++04530///Tight junction+++04210///Apoptosis+++04390///Hippo signaling pathway+++04745///Phototransduction - fly+++04…	Organismal Systems+++Cellular Processes+++Environmental Information Processing	Cell growth and death+++Sensory system+++Transport and catabolism+++Cellular community - eukaryotes+++Endocrine system+++Cell motility+++Immune system+++Signal transduction+++Environmental adaptation	6.28587	9.69124e-11	1.67943e-09
	685590	LOC685590	mRNA	04213///Longevity regulating pathway - multiple species+++04660///T cell receptor signaling pathway+++04012///ErbB signaling pathway+++04625///C-type lectin receptor signaling pathway+++04750///Inflammatory mediator regulation of TRP channels+++04650///Natural killer cell mediated cytotoxicity+++04917///Prolactin signaling pathway+++04150///mTOR signaling pathway+++04914///Progesterone-mediated o…	Cellular Processes+++Organismal Systems+++Environmental Information Processing+++Metabolism	Nervous system+++Excretory system+++Cell growth and death+++Sensory system+++Transport and catabolism+++Digestive system+++Cellular community - eukaryotes+++Aging+++Endocrine system+++Cell motility+++Immune system+++Signal transduction+++Development+++Carbohydrate metabolism	0.869374	1.13794e-06	1.11885e-05
Cell adhesion molecules (CAMs)
	100364500	LOC100364500	mRNA	04514///Cell adhesion molecules (CAMs)+++04145///Phagosome+++04144///Endocytosis+++04218///Cellular senescence+++04612///Antigen processing and presentation	Organismal Systems+++Cellular Processes+++Environmental Information Processing	Cell growth and death+++Transport and catabolism+++Signaling molecules and interaction+++Immune system	0.73547	7.19817e-21	2.68276e-19
	103690108	LOC103690108	mRNA	04514///Cell adhesion molecules (CAMs)+++04145///Phagosome+++04144///Endocytosis+++04218///Cellular senescence+++04612///Antigen processing and presentation	Organismal Systems+++Cellular Processes+++Environmental Information Processing	Cell growth and death+++Transport and catabolism+++Signaling molecules and interaction+++Immune system	0.848043	2.65183e-144	7.42708e-142
	114122	Vcan	mRNA	04514///Cell adhesion molecules (CAMs)	Environmental Information Processing	Signaling molecules and interaction	1.18679	3.59997e-98	6.72171e-96
	25021	Itgam	mRNA	04640///Hematopoietic cell lineage+++04514///Cell adhesion molecules (CAMs)+++04145///Phagosome+++04810///Regulation of actin cytoskeleton+++04015///Rap1 signaling pathway+++04610///Complement and coagulation cascades+++04670///Leukocyte transendothelial migration	Organismal Systems+++Cellular Processes+++Environmental Information Processing	Transport and catabolism+++Signaling molecules and interaction+++Cell motility+++Immune system+++Signal transduction	0.743518	9.0324e-12	1.76796e-10
	25660	Cd28	mRNA	04660///T cell receptor signaling pathway+++04514///Cell adhesion molecules (CAMs)+++04672///Intestinal immune network for IgA production	Organismal Systems+++Environmental Information Processing	Signaling molecules and interaction+++Immune system	1.17574	3.60814e-06	3.23679e-05
	306454	Cldn22	mRNA	04514///Cell adhesion molecules (CAMs)+++04530///Tight junction+++04670///Leukocyte transendothelial migration	Organismal Systems+++Cellular Processes+++Environmental Information Processing	Cellular community - eukaryotes+++Signaling molecules and interaction+++Immune system	0.749006	0.000121418	0.000792464
	311426	Siglec1	mRNA	04514///Cell adhesion molecules (CAMs)	Environmental Information Processing	Signaling molecules and interaction	0.625028	2.9675e-10	4.87628e-09
	65129	Cldn1	mRNA	04514///Cell adhesion molecules (CAMs)+++04530///Tight junction+++04670///Leukocyte transendothelial migration	Organismal Systems+++Cellular Processes+++Environmental Information Processing	Cellular community - eukaryotes+++Signaling molecules and interaction+++Immune system	0.716612	2.30088e-94	4.05744e-92
	83497	Ocln	mRNA	04514///Cell adhesion molecules (CAMs)+++04530///Tight junction+++04670///Leukocyte transendothelial migration	Organismal Systems+++Cellular Processes+++Environmental Information Processing	Cellular community - eukaryotes+++Signaling molecules and interaction+++Immune system	0.828025	5.38815e-13	1.18633e-11
Leukocyte transendothelial migration
	25021	Itgam	mRNA	04640///Hematopoietic cell lineage+++04514///Cell adhesion molecules (CAMs)+++04145///Phagosome+++04810///Regulation of actin cytoskeleton+++04015///Rap1 signaling pathway+++04610///Complement and coagulation cascades+++04670///Leukocyte transendothelial migration	Organismal Systems+++Cellular Processes+++Environmental Information Processing	Transport and catabolism+++Signaling molecules and interaction+++Cell motility+++Immune system+++Signal transduction	0.743518	9.0324e-12	1.76796e-10
	306454	Cldn22	mRNA	04514///Cell adhesion molecules (CAMs)+++04530///Tight junction+++04670///Leukocyte transendothelial migration	Organismal Systems+++Cellular Processes+++Environmental Information Processing	Cellular community - eukaryotes+++Signaling molecules and interaction+++Immune system	0.749006	0.000121418	0.000792464
	65129	Cldn1	mRNA	04514///Cell adhesion molecules (CAMs)+++04530///Tight junction+++04670///Leukocyte transendothelial migration	Organismal Systems+++Cellular Processes+++Environmental Information Processing	Cellular community - eukaryotes+++Signaling molecules and interaction+++Immune system	0.716612	2.30088e-94	4.05744e-92
	66021	Cybb	mRNA	04217///Necroptosis+++04621///NOD-like receptor signaling pathway+++04145///Phagosome+++04216///Ferroptosis+++04066///HIF-1 signaling pathway+++04670///Leukocyte transendothelial migration	Organismal Systems+++Cellular Processes+++Environmental Information Processing	Cell growth and death+++Transport and catabolism+++Immune system+++Signal transduction	0.717021	3.62119e-13	8.08506e-12
	684969	Potef	mRNA	04714///Thermogenesis+++04921///Oxytocin signaling pathway+++04145///Phagosome+++04510///Focal adhesion+++04810///Regulation of actin cytoskeleton+++04611///Platelet activation+++04015///Rap1 signaling pathway+++04919///Thyroid hormone signaling pathway+++04520///Adherens junction+++04530///Tight junction+++04210///Apoptosis+++04390///Hippo signaling pathway+++04745///Phototransduction - fly+++04…	Organismal Systems+++Cellular Processes+++Environmental Information Processing	Cell growth and death+++Sensory system+++Transport and catabolism+++Cellular community - eukaryotes+++Endocrine system+++Cell motility+++Immune system+++Signal transduction+++Environmental adaptation	6.28587	9.69124e-11	1.67943e-09
	685590	LOC685590	mRNA	04213///Longevity regulating pathway - multiple species+++04660///T cell receptor signaling pathway+++04012///ErbB signaling pathway+++04625///C-type lectin receptor signaling pathway+++04750///Inflammatory mediator regulation of TRP channels+++04650///Natural killer cell mediated cytotoxicity+++04917///Prolactin signaling pathway+++04150///mTOR signaling pathway+++04914///Progesterone-mediated o…	Cellular Processes+++Organismal Systems+++Environmental Information Processing+++Metabolism	Nervous system+++Excretory system+++Cell growth and death+++Sensory system+++Transport and catabolism+++Digestive system+++Cellular community - eukaryotes+++Aging+++Endocrine system+++Cell motility+++Immune system+++Signal transduction+++Development+++Carbohydrate metabolism	0.869374	1.13794e-06	1.11885e-05
	83497	Ocln	mRNA	04514///Cell adhesion molecules (CAMs)+++04530///Tight junction+++04670///Leukocyte transendothelial migration	Organismal Systems+++Cellular Processes+++Environmental Information Processing	Cellular community - eukaryotes+++Signaling molecules and interaction+++Immune system	0.828025	5.38815e-13	1.18633e-11
TGF-beta signaling pathway
	103691556	LOC103691556	mRNA	04350///TGF-beta signaling pathway+++04550///Signaling pathways regulating pluripotency of stem cells	Cellular Processes+++Environmental Information Processing	Cellular community - eukaryotes+++Signal transduction	7.60825	6.939e-62	8.58139e-60
	29139	Dcn	mRNA	04350///TGF-beta signaling pathway	Environmental Information Processing	Signal transduction	0.762996	0	0
	29200	Inhba	mRNA	04350///TGF-beta signaling pathway+++04550///Signaling pathways regulating pluripotency of stem cells+++04060///Cytokine-cytokine receptor interaction	Cellular Processes+++Environmental Information Processing	Cellular community - eukaryotes+++Signaling molecules and interaction+++Signal transduction	0.631974	3.29357e-06	2.9728e-05
	445442	Thbs1	mRNA	04145///Phagosome+++04510///Focal adhesion+++04512///ECM-receptor interaction+++04015///Rap1 signaling pathway+++04115///p53 signaling pathway+++04350///TGF-beta signaling pathway+++04151///PI3K-Akt signaling pathway	Cellular Processes+++Environmental Information Processing	Cell growth and death+++Transport and catabolism+++Cellular community - eukaryotes+++Signaling molecules and interaction+++Signal transduction	0.64886	5.43632e-30	3.07225e-28
	85272	Bmp7	mRNA	04360///Axon guidance+++04350///TGF-beta signaling pathway+++04060///Cytokine-cytokine receptor interaction+++04390///Hippo signaling pathway	Organismal Systems+++Environmental Information Processing	Signaling molecules and interaction+++Signal transduction+++Development	0.668956	4.01385e-11	7.23215e-10
Cytokine-cytokine receptor interaction
	117029	Ccr5	mRNA	04144///Endocytosis+++04060///Cytokine-cytokine receptor interaction+++04062///Chemokine signaling pathway	Cellular Processes+++Organismal Systems+++Environmental Information Processing	Transport and catabolism+++Signaling molecules and interaction+++Immune system	0.721805	2.75982e-11	5.11789e-10
	24536	Lepr	mRNA	04080///Neuroactive ligand-receptor interaction+++04630///Jak-STAT signaling pathway+++04920///Adipocytokine signaling pathway+++04060///Cytokine-cytokine receptor interaction+++04152///AMPK signaling pathway	Organismal Systems+++Environmental Information Processing	Signaling molecules and interaction+++Endocrine system+++Signal transduction	0.704721	1.78095e-32	1.09768e-30
	287561	Ccl7	mRNA	04657///IL-17 signaling pathway+++04060///Cytokine-cytokine receptor interaction+++04062///Chemokine signaling pathway	Organismal Systems+++Environmental Information Processing	Signaling molecules and interaction+++Immune system	1.01027	9.08764e-09	1.23097e-07
	29200	Inhba	mRNA	04350///TGF-beta signaling pathway+++04550///Signaling pathways regulating pluripotency of stem cells+++04060///Cytokine-cytokine receptor interaction	Cellular Processes+++Environmental Information Processing	Cellular community - eukaryotes+++Signaling molecules and interaction+++Signal transduction	0.631974	3.29357e-06	2.9728e-05
	306748	Cxcl14	mRNA	04060///Cytokine-cytokine receptor interaction+++04062///Chemokine signaling pathway	Organismal Systems+++Environmental Information Processing	Signaling molecules and interaction+++Immune system	1.69757	5.58164e-67	7.33119e-65
	310738	Ngf	mRNA	04750///Inflammatory mediator regulation of TRP channels+++04010///MAPK signaling pathway+++04015///Rap1 signaling pathway+++04014///Ras signaling pathway+++04060///Cytokine-cytokine receptor interaction+++04210///Apoptosis+++04722///Neurotrophin signaling pathway+++04151///PI3K-Akt signaling pathway	Organismal Systems+++Cellular Processes+++Environmental Information Processing	Nervous system+++Cell growth and death+++Sensory system+++Signaling molecules and interaction+++Signal transduction	1.22087	2.30156e-07	2.53959e-06
	365395	Clcf1	mRNA	04060///Cytokine-cytokine receptor interaction	Environmental Information Processing	Signaling molecules and interaction	0.949254	4.79365e-05	0.000342699
	498335	Cxcl13	mRNA	04060///Cytokine-cytokine receptor interaction+++04062///Chemokine signaling pathway	Organismal Systems+++Environmental Information Processing	Signaling molecules and interaction+++Immune system	1.38177	1.02833e-33	6.57196e-32
	85272	Bmp7	mRNA	04360///Axon guidance+++04350///TGF-beta signaling pathway+++04060///Cytokine-cytokine receptor interaction+++04390///Hippo signaling pathway	Organismal Systems+++Environmental Information Processing	Signaling molecules and interaction+++Signal transduction+++Development	0.668956	4.01385e-11	7.23215e-10

## Sheet: Downregulated
	Gene ID	Gene Symbol	Type	kegg_pathway_term	KEGG Pathway Term Level1	KEGG Pathway Term Level2	log2 (CPIP_DEG_left / Sham_DEG_left)	Pvalue(CPIP_DEG_left / Sham_DEG_left)	Qvalue (CPIP_DEG_left / Sham_DEG_left)
Cardiac muscle contraction
	140727	Cacng6	mRNA	04921///Oxytocin signaling pathway+++04261///Adrenergic signaling in cardiomyocytes+++04010///MAPK signaling pathway+++04260///Cardiac muscle contraction	Organismal Systems+++Environmental Information Processing	Endocrine system+++Circulatory system+++Signal transduction	-1.8358	4.0631e-05	0.0002949
	24585	Myl3	mRNA	04261///Adrenergic signaling in cardiomyocytes+++04260///Cardiac muscle contraction+++04371///Apelin signaling pathway	Organismal Systems+++Environmental Information Processing	Circulatory system+++Signal transduction	-1.32563	4.09645e-08	5.04964e-07
	25250	Cox8b	mRNA	04714///Thermogenesis+++01100///Metabolic pathways+++04260///Cardiac muscle contraction+++00190///Oxidative phosphorylation	Organismal Systems+++Metabolism	Global and overview maps+++Circulatory system+++Environmental adaptation+++Energy metabolism	-3.49373	1.00757e-16	3.00772e-15
	25278	Cox6a2	mRNA	04714///Thermogenesis+++01100///Metabolic pathways+++04260///Cardiac muscle contraction+++00190///Oxidative phosphorylation	Organismal Systems+++Metabolism	Global and overview maps+++Circulatory system+++Environmental adaptation+++Energy metabolism	-4.63812	1.15204e-108	2.38485e-106
	29658	Cacng1	mRNA	04921///Oxytocin signaling pathway+++04261///Adrenergic signaling in cardiomyocytes+++04010///MAPK signaling pathway+++04260///Cardiac muscle contraction	Organismal Systems+++Environmental Information Processing	Endocrine system+++Circulatory system+++Signal transduction	-6.16723	1.30744e-18	4.38382e-17
	363925	Myl2	mRNA	04510///Focal adhesion+++04261///Adrenergic signaling in cardiomyocytes+++04810///Regulation of actin cytoskeleton+++04530///Tight junction+++04260///Cardiac muscle contraction+++04670///Leukocyte transendothelial migration+++04371///Apelin signaling pathway	Cellular Processes+++Organismal Systems+++Environmental Information Processing	Cellular community - eukaryotes+++Circulatory system+++Cell motility+++Immune system+++Signal transduction	-5.9515	7.12767e-09	9.79412e-08
	500450	Tpm2	mRNA	04261///Adrenergic signaling in cardiomyocytes+++04260///Cardiac muscle contraction	Organismal Systems	Circulatory system	-2.19298	0	0
	682930	Cacna1s	mRNA	04723///Retrograde endocannabinoid signaling+++04020///Calcium signaling pathway+++04921///Oxytocin signaling pathway+++04261///Adrenergic signaling in cardiomyocytes+++04925///Aldosterone synthesis and secretion+++04010///MAPK signaling pathway+++04727///GABAergic synapse+++04725///Cholinergic synapse+++04924///Renin secretion+++04911///Insulin secretion+++04260///Cardiac muscle contraction+++04…	Organismal Systems+++Environmental Information Processing	Nervous system+++Endocrine system+++Circulatory system+++Signal transduction	-3.71682	1.32109e-106	2.70539e-104
	84396	Atp1b4	mRNA	04918///Thyroid hormone synthesis+++04974///Protein digestion and absorption+++04964///Proximal tubule bicarbonate reclamation+++04978///Mineral absorption+++04971///Gastric acid secretion+++04261///Adrenergic signaling in cardiomyocytes+++04960///Aldosterone-regulated sodium reabsorption+++04925///Aldosterone synthesis and secretion+++04970///Salivary secretion+++04961///Endocrine and other fact…	Organismal Systems+++Environmental Information Processing	Excretory system+++Digestive system+++Endocrine system+++Circulatory system+++Signal transduction	-2.58227	7.44228e-05	0.000509392
Apelin signaling pathway
	100911372	LOC100911372	mRNA	04714///Thermogenesis+++04150///mTOR signaling pathway+++04066///HIF-1 signaling pathway+++03010///Ribosome+++04910///Insulin signaling pathway+++04151///PI3K-Akt signaling pathway+++04371///Apelin signaling pathway	Genetic Information Processing+++Organismal Systems+++Environmental Information Processing	Endocrine system+++Signal transduction+++Environmental adaptation+++Translation	-0.699935	4.8467e-18	1.58328e-16
	103689985	LOC103689985	mRNA	04020///Calcium signaling pathway+++04921///Oxytocin signaling pathway+++04971///Gastric acid secretion+++04510///Focal adhesion+++04810///Regulation of actin cytoskeleton+++04611///Platelet activation+++04022///cGMP-PKG signaling pathway+++04270///Vascular smooth muscle contraction+++04371///Apelin signaling pathway	Cellular Processes+++Organismal Systems+++Environmental Information Processing	Digestive system+++Cellular community - eukaryotes+++Endocrine system+++Circulatory system+++Cell motility+++Immune system+++Signal transduction	-3.9042	1.71603e-26	8.55545e-25
	114207	Ryr1	mRNA	04020///Calcium signaling pathway+++04921///Oxytocin signaling pathway+++04713///Circadian entrainment+++04730///Long-term depression+++04371///Apelin signaling pathway	Organismal Systems+++Environmental Information Processing	Nervous system+++Endocrine system+++Signal transduction+++Environmental adaptation	-3.56583	1.00898e-196	3.49381e-194
	117558	Mylk2	mRNA	04020///Calcium signaling pathway+++04921///Oxytocin signaling pathway+++04971///Gastric acid secretion+++04510///Focal adhesion+++04810///Regulation of actin cytoskeleton+++04611///Platelet activation+++04022///cGMP-PKG signaling pathway+++04270///Vascular smooth muscle contraction+++04371///Apelin signaling pathway	Cellular Processes+++Organismal Systems+++Environmental Information Processing	Digestive system+++Cellular community - eukaryotes+++Endocrine system+++Circulatory system+++Cell motility+++Immune system+++Signal transduction	-3.85679	1.04412e-99	1.98853e-97
	24585	Myl3	mRNA	04261///Adrenergic signaling in cardiomyocytes+++04260///Cardiac muscle contraction+++04371///Apelin signaling pathway	Organismal Systems+++Environmental Information Processing	Circulatory system+++Signal transduction	-1.32563	4.09645e-08	5.04964e-07
	25629	Plin1	mRNA	04714///Thermogenesis+++04923///Regulation of lipolysis in adipocytes+++03320///PPAR signaling pathway+++04371///Apelin signaling pathway	Organismal Systems+++Environmental Information Processing	Endocrine system+++Signal transduction+++Environmental adaptation	-1.72429	8.31147e-10	1.29641e-08
	301518	Prkag3	mRNA	04213///Longevity regulating pathway - multiple species+++04714///Thermogenesis+++04922///Glucagon signaling pathway+++04921///Oxytocin signaling pathway+++04710///Circadian rhythm+++04920///Adipocytokine signaling pathway+++04530///Tight junction+++04211///Longevity regulating pathway+++04068///FoxO signaling pathway+++04910///Insulin signaling pathway+++04152///AMPK signaling pathway+++04371///…	Cellular Processes+++Organismal Systems+++Environmental Information Processing	Cellular community - eukaryotes+++Aging+++Endocrine system+++Signal transduction+++Environmental adaptation	-2.27741	5.63593e-10	8.97461e-09
	307100	Calml3	mRNA	04922///Glucagon signaling pathway+++04625///C-type lectin receptor signaling pathway+++04750///Inflammatory mediator regulation of TRP channels+++04020///Calcium signaling pathway+++04921///Oxytocin signaling pathway+++04971///Gastric acid secretion+++04713///Circadian entrainment+++04915///Estrogen signaling pathway+++04114///Oocyte meiosis+++04261///Adrenergic signaling in cardiomyocytes+++047…	Organismal Systems+++Cellular Processes+++Environmental Information Processing	Nervous system+++Cell growth and death+++Sensory system+++Digestive system+++Endocrine system+++Circulatory system+++Immune system+++Signal transduction+++Environmental adaptation	-2.43788	1.39646e-06	1.35208e-05
	363925	Myl2	mRNA	04510///Focal adhesion+++04261///Adrenergic signaling in cardiomyocytes+++04810///Regulation of actin cytoskeleton+++04530///Tight junction+++04260///Cardiac muscle contraction+++04670///Leukocyte transendothelial migration+++04371///Apelin signaling pathway	Cellular Processes+++Organismal Systems+++Environmental Information Processing	Cellular community - eukaryotes+++Circulatory system+++Cell motility+++Immune system+++Signal transduction	-5.9515	7.12767e-09	9.79412e-08
	64032	Ctgf	mRNA	04390///Hippo signaling pathway+++04371///Apelin signaling pathway	Environmental Information Processing	Signal transduction	-0.680743	1.23063e-29	6.89331e-28
	81633	Acta2	mRNA	04926///Relaxin signaling pathway+++04270///Vascular smooth muscle contraction+++04371///Apelin signaling pathway	Organismal Systems+++Environmental Information Processing	Endocrine system+++Circulatory system+++Signal transduction	-0.652727	4.22377e-49	3.98226e-47
Glucagon signaling pathway
	100364062	LOC100364062	mRNA	04922///Glucagon signaling pathway+++01110///Biosynthesis of secondary metabolites+++01200///Carbon metabolism+++01100///Metabolic pathways+++00230///Purine metabolism+++00620///Pyruvate metabolism+++01120///Microbial metabolism in diverse environments+++01230///Biosynthesis of amino acids+++01130///Biosynthesis of antibiotics+++00010///Glycolysis / Gluconeogenesis	Organismal Systems+++Metabolism	Global and overview maps+++Nucleotide metabolism+++Endocrine system+++Carbohydrate metabolism	-2.16206	1.17694e-07	1.36509e-06
	100912471	LOC100912471	mRNA	04922///Glucagon signaling pathway+++01110///Biosynthesis of secondary metabolites+++00270///Cysteine and methionine metabolism+++01100///Metabolic pathways+++00620///Pyruvate metabolism+++01120///Microbial metabolism in diverse environments+++00640///Propanoate metabolism+++01130///Biosynthesis of antibiotics+++00010///Glycolysis / Gluconeogenesis	Organismal Systems+++Metabolism	Global and overview maps+++Amino acid metabolism+++Endocrine system+++Carbohydrate metabolism	-2.54643	2.61104e-08	3.30194e-07
	24701	Pygm	mRNA	04217///Necroptosis+++04922///Glucagon signaling pathway+++01110///Biosynthesis of secondary metabolites+++01100///Metabolic pathways+++02026///Biofilm formation - Escherichia coli+++00500///Starch and sucrose metabolism+++04910///Insulin signaling pathway	Organismal Systems+++Cellular Processes+++Metabolism	Global and overview maps+++Cell growth and death+++Endocrine system+++Cellular community - prokaryotes+++Carbohydrate metabolism	-2.80484	0	0
	24959	Pgam2	mRNA	04922///Glucagon signaling pathway+++01110///Biosynthesis of secondary metabolites+++01200///Carbon metabolism+++01100///Metabolic pathways+++00260///Glycine, serine and threonine metabolism+++01120///Microbial metabolism in diverse environments+++01230///Biosynthesis of amino acids+++01130///Biosynthesis of antibiotics+++00010///Glycolysis / Gluconeogenesis+++00680///Methane metabolism	Organismal Systems+++Metabolism	Global and overview maps+++Amino acid metabolism+++Endocrine system+++Energy metabolism+++Carbohydrate metabolism	-1.77972	1.98032e-109	4.14453e-107
	29353	Phkg1	mRNA	04922///Glucagon signaling pathway+++04020///Calcium signaling pathway+++04910///Insulin signaling pathway	Organismal Systems+++Environmental Information Processing	Endocrine system+++Signal transduction	-1.87866	2.68837e-08	3.39297e-07
	301518	Prkag3	mRNA	04213///Longevity regulating pathway - multiple species+++04714///Thermogenesis+++04922///Glucagon signaling pathway+++04921///Oxytocin signaling pathway+++04710///Circadian rhythm+++04920///Adipocytokine signaling pathway+++04530///Tight junction+++04211///Longevity regulating pathway+++04068///FoxO signaling pathway+++04910///Insulin signaling pathway+++04152///AMPK signaling pathway+++04371///…	Cellular Processes+++Organismal Systems+++Environmental Information Processing	Cellular community - eukaryotes+++Aging+++Endocrine system+++Signal transduction+++Environmental adaptation	-2.27741	5.63593e-10	8.97461e-09
	307100	Calml3	mRNA	04922///Glucagon signaling pathway+++04625///C-type lectin receptor signaling pathway+++04750///Inflammatory mediator regulation of TRP channels+++04020///Calcium signaling pathway+++04921///Oxytocin signaling pathway+++04971///Gastric acid secretion+++04713///Circadian entrainment+++04915///Estrogen signaling pathway+++04114///Oocyte meiosis+++04261///Adrenergic signaling in cardiomyocytes+++047…	Organismal Systems+++Cellular Processes+++Environmental Information Processing	Nervous system+++Cell growth and death+++Sensory system+++Digestive system+++Endocrine system+++Circulatory system+++Immune system+++Signal transduction+++Environmental adaptation	-2.43788	1.39646e-06	1.35208e-05
	362282	Pck1	mRNA	04922///Glucagon signaling pathway+++01110///Biosynthesis of secondary metabolites+++04964///Proximal tubule bicarbonate reclamation+++01100///Metabolic pathways+++00620///Pyruvate metabolism+++01120///Microbial metabolism in diverse environments+++04920///Adipocytokine signaling pathway+++00020///Citrate cycle (TCA cycle)+++03320///PPAR signaling pathway+++04068///FoxO signaling pathway+++04910/…	Organismal Systems+++Environmental Information Processing+++Metabolism	Global and overview maps+++Excretory system+++Endocrine system+++Signal transduction+++Carbohydrate metabolism	-3.14863	4.4902e-28	2.38206e-26
Focal adhesion
	103689985	LOC103689985	mRNA	04020///Calcium signaling pathway+++04921///Oxytocin signaling pathway+++04971///Gastric acid secretion+++04510///Focal adhesion+++04810///Regulation of actin cytoskeleton+++04611///Platelet activation+++04022///cGMP-PKG signaling pathway+++04270///Vascular smooth muscle contraction+++04371///Apelin signaling pathway	Cellular Processes+++Organismal Systems+++Environmental Information Processing	Digestive system+++Cellular community - eukaryotes+++Endocrine system+++Circulatory system+++Cell motility+++Immune system+++Signal transduction	-3.9042	1.71603e-26	8.55545e-25
	117558	Mylk2	mRNA	04020///Calcium signaling pathway+++04921///Oxytocin signaling pathway+++04971///Gastric acid secretion+++04510///Focal adhesion+++04810///Regulation of actin cytoskeleton+++04611///Platelet activation+++04022///cGMP-PKG signaling pathway+++04270///Vascular smooth muscle contraction+++04371///Apelin signaling pathway	Cellular Processes+++Organismal Systems+++Environmental Information Processing	Digestive system+++Cellular community - eukaryotes+++Endocrine system+++Circulatory system+++Cell motility+++Immune system+++Signal transduction	-3.85679	1.04412e-99	1.98853e-97
	24477	Ibsp	mRNA	04510///Focal adhesion+++04512///ECM-receptor interaction+++04151///PI3K-Akt signaling pathway	Cellular Processes+++Environmental Information Processing	Cellular community - eukaryotes+++Signaling molecules and interaction+++Signal transduction	-1.74421	1.09558e-56	1.2131e-54
	24584	Mylpf	mRNA	04510///Focal adhesion+++04810///Regulation of actin cytoskeleton+++04670///Leukocyte transendothelial migration	Organismal Systems+++Cellular Processes	Cellular community - eukaryotes+++Cell motility+++Immune system	-5.34165	0	0
	25304	Comp	mRNA	04145///Phagosome+++04510///Focal adhesion+++04512///ECM-receptor interaction+++04151///PI3K-Akt signaling pathway	Cellular Processes+++Environmental Information Processing	Transport and catabolism+++Cellular community - eukaryotes+++Signaling molecules and interaction+++Signal transduction	-0.674322	2.6611e-22	1.07147e-20
	25412	Col2a1	mRNA	04974///Protein digestion and absorption+++04510///Focal adhesion+++04512///ECM-receptor interaction+++04151///PI3K-Akt signaling pathway	Organismal Systems+++Cellular Processes+++Environmental Information Processing	Digestive system+++Cellular community - eukaryotes+++Signaling molecules and interaction+++Signal transduction	-1.66991	0	0
	29195	Chad	mRNA	04510///Focal adhesion+++04512///ECM-receptor interaction+++04151///PI3K-Akt signaling pathway	Cellular Processes+++Environmental Information Processing	Cellular community - eukaryotes+++Signaling molecules and interaction+++Signal transduction	-1.47061	1.16517e-22	4.79278e-21
	304913	Tnn	mRNA	04510///Focal adhesion+++04512///ECM-receptor interaction+++04151///PI3K-Akt signaling pathway	Cellular Processes+++Environmental Information Processing	Cellular community - eukaryotes+++Signaling molecules and interaction+++Signal transduction	-1.76284	5.51941e-06	4.77155e-05
	305104	Col9a1	mRNA	04974///Protein digestion and absorption+++04510///Focal adhesion+++04512///ECM-receptor interaction+++04151///PI3K-Akt signaling pathway	Organismal Systems+++Cellular Processes+++Environmental Information Processing	Digestive system+++Cellular community - eukaryotes+++Signaling molecules and interaction+++Signal transduction	-0.629382	4.14185e-14	1.03113e-12
	363925	Myl2	mRNA	04510///Focal adhesion+++04261///Adrenergic signaling in cardiomyocytes+++04810///Regulation of actin cytoskeleton+++04530///Tight junction+++04260///Cardiac muscle contraction+++04670///Leukocyte transendothelial migration+++04371///Apelin signaling pathway	Cellular Processes+++Organismal Systems+++Environmental Information Processing	Cellular community - eukaryotes+++Circulatory system+++Cell motility+++Immune system+++Signal transduction	-5.9515	7.12767e-09	9.79412e-08
Adrenergic signaling in cardiomyocytes
	140727	Cacng6	mRNA	04921///Oxytocin signaling pathway+++04261///Adrenergic signaling in cardiomyocytes+++04010///MAPK signaling pathway+++04260///Cardiac muscle contraction	Organismal Systems+++Environmental Information Processing	Endocrine system+++Circulatory system+++Signal transduction	-1.8358	4.0631e-05	0.0002949
	24585	Myl3	mRNA	04261///Adrenergic signaling in cardiomyocytes+++04260///Cardiac muscle contraction+++04371///Apelin signaling pathway	Organismal Systems+++Environmental Information Processing	Circulatory system+++Signal transduction	-1.32563	4.09645e-08	5.04964e-07
	29658	Cacng1	mRNA	04921///Oxytocin signaling pathway+++04261///Adrenergic signaling in cardiomyocytes+++04010///MAPK signaling pathway+++04260///Cardiac muscle contraction	Organismal Systems+++Environmental Information Processing	Endocrine system+++Circulatory system+++Signal transduction	-6.16723	1.30744e-18	4.38382e-17
	307100	Calml3	mRNA	04922///Glucagon signaling pathway+++04625///C-type lectin receptor signaling pathway+++04750///Inflammatory mediator regulation of TRP channels+++04020///Calcium signaling pathway+++04921///Oxytocin signaling pathway+++04971///Gastric acid secretion+++04713///Circadian entrainment+++04915///Estrogen signaling pathway+++04114///Oocyte meiosis+++04261///Adrenergic signaling in cardiomyocytes+++047…	Organismal Systems+++Cellular Processes+++Environmental Information Processing	Nervous system+++Cell growth and death+++Sensory system+++Digestive system+++Endocrine system+++Circulatory system+++Immune system+++Signal transduction+++Environmental adaptation	-2.43788	1.39646e-06	1.35208e-05
	363925	Myl2	mRNA	04510///Focal adhesion+++04261///Adrenergic signaling in cardiomyocytes+++04810///Regulation of actin cytoskeleton+++04530///Tight junction+++04260///Cardiac muscle contraction+++04670///Leukocyte transendothelial migration+++04371///Apelin signaling pathway	Cellular Processes+++Organismal Systems+++Environmental Information Processing	Cellular community - eukaryotes+++Circulatory system+++Cell motility+++Immune system+++Signal transduction	-5.9515	7.12767e-09	9.79412e-08
	500450	Tpm2	mRNA	04261///Adrenergic signaling in cardiomyocytes+++04260///Cardiac muscle contraction	Organismal Systems	Circulatory system	-2.19298	0	0
	682930	Cacna1s	mRNA	04723///Retrograde endocannabinoid signaling+++04020///Calcium signaling pathway+++04921///Oxytocin signaling pathway+++04261///Adrenergic signaling in cardiomyocytes+++04925///Aldosterone synthesis and secretion+++04010///MAPK signaling pathway+++04727///GABAergic synapse+++04725///Cholinergic synapse+++04924///Renin secretion+++04911///Insulin secretion+++04260///Cardiac muscle contraction+++04…	Organismal Systems+++Environmental Information Processing	Nervous system+++Endocrine system+++Circulatory system+++Signal transduction	-3.71682	1.32109e-106	2.70539e-104
	84396	Atp1b4	mRNA	04918///Thyroid hormone synthesis+++04974///Protein digestion and absorption+++04964///Proximal tubule bicarbonate reclamation+++04978///Mineral absorption+++04971///Gastric acid secretion+++04261///Adrenergic signaling in cardiomyocytes+++04960///Aldosterone-regulated sodium reabsorption+++04925///Aldosterone synthesis and secretion+++04970///Salivary secretion+++04961///Endocrine and other fact…	Organismal Systems+++Environmental Information Processing	Excretory system+++Digestive system+++Endocrine system+++Circulatory system+++Signal transduction	-2.58227	7.44228e-05	0.000509392
Insulin signaling pathway
	100911372	LOC100911372	mRNA	04714///Thermogenesis+++04150///mTOR signaling pathway+++04066///HIF-1 signaling pathway+++03010///Ribosome+++04910///Insulin signaling pathway+++04151///PI3K-Akt signaling pathway+++04371///Apelin signaling pathway	Genetic Information Processing+++Organismal Systems+++Environmental Information Processing	Endocrine system+++Signal transduction+++Environmental adaptation+++Translation	-0.699935	4.8467e-18	1.58328e-16
	24701	Pygm	mRNA	04217///Necroptosis+++04922///Glucagon signaling pathway+++01110///Biosynthesis of secondary metabolites+++01100///Metabolic pathways+++02026///Biofilm formation - Escherichia coli+++00500///Starch and sucrose metabolism+++04910///Insulin signaling pathway	Organismal Systems+++Cellular Processes+++Metabolism	Global and overview maps+++Cell growth and death+++Endocrine system+++Cellular community - prokaryotes+++Carbohydrate metabolism	-2.80484	0	0
	25139	Slc2a4	mRNA	04920///Adipocytokine signaling pathway+++04068///FoxO signaling pathway+++04910///Insulin signaling pathway+++04152///AMPK signaling pathway	Organismal Systems+++Environmental Information Processing	Endocrine system+++Signal transduction	-0.711002	2.44562e-08	3.10098e-07
	29353	Phkg1	mRNA	04922///Glucagon signaling pathway+++04020///Calcium signaling pathway+++04910///Insulin signaling pathway	Organismal Systems+++Environmental Information Processing	Endocrine system+++Signal transduction	-1.87866	2.68837e-08	3.39297e-07
	301518	Prkag3	mRNA	04213///Longevity regulating pathway - multiple species+++04714///Thermogenesis+++04922///Glucagon signaling pathway+++04921///Oxytocin signaling pathway+++04710///Circadian rhythm+++04920///Adipocytokine signaling pathway+++04530///Tight junction+++04211///Longevity regulating pathway+++04068///FoxO signaling pathway+++04910///Insulin signaling pathway+++04152///AMPK signaling pathway+++04371///…	Cellular Processes+++Organismal Systems+++Environmental Information Processing	Cellular community - eukaryotes+++Aging+++Endocrine system+++Signal transduction+++Environmental adaptation	-2.27741	5.63593e-10	8.97461e-09
	307100	Calml3	mRNA	04922///Glucagon signaling pathway+++04625///C-type lectin receptor signaling pathway+++04750///Inflammatory mediator regulation of TRP channels+++04020///Calcium signaling pathway+++04921///Oxytocin signaling pathway+++04971///Gastric acid secretion+++04713///Circadian entrainment+++04915///Estrogen signaling pathway+++04114///Oocyte meiosis+++04261///Adrenergic signaling in cardiomyocytes+++047…	Organismal Systems+++Cellular Processes+++Environmental Information Processing	Nervous system+++Cell growth and death+++Sensory system+++Digestive system+++Endocrine system+++Circulatory system+++Immune system+++Signal transduction+++Environmental adaptation	-2.43788	1.39646e-06	1.35208e-05
	362282	Pck1	mRNA	04922///Glucagon signaling pathway+++01110///Biosynthesis of secondary metabolites+++04964///Proximal tubule bicarbonate reclamation+++01100///Metabolic pathways+++00620///Pyruvate metabolism+++01120///Microbial metabolism in diverse environments+++04920///Adipocytokine signaling pathway+++00020///Citrate cycle (TCA cycle)+++03320///PPAR signaling pathway+++04068///FoxO signaling pathway+++04910/…	Organismal Systems+++Environmental Information Processing+++Metabolism	Global and overview maps+++Excretory system+++Endocrine system+++Signal transduction+++Carbohydrate metabolism	-3.14863	4.4902e-28	2.38206e-26
	500036	Ppp1r3a	mRNA	04910///Insulin signaling pathway	Organismal Systems	Endocrine system	-2.8428	7.13466e-20	2.507e-18
Calcium signaling pathway
	103689985	LOC103689985	mRNA	04020///Calcium signaling pathway+++04921///Oxytocin signaling pathway+++04971///Gastric acid secretion+++04510///Focal adhesion+++04810///Regulation of actin cytoskeleton+++04611///Platelet activation+++04022///cGMP-PKG signaling pathway+++04270///Vascular smooth muscle contraction+++04371///Apelin signaling pathway	Cellular Processes+++Organismal Systems+++Environmental Information Processing	Digestive system+++Cellular community - eukaryotes+++Endocrine system+++Circulatory system+++Cell motility+++Immune system+++Signal transduction	-3.9042	1.71603e-26	8.55545e-25
	108352449	LOC108352449	mRNA	04621///NOD-like receptor signaling pathway+++04020///Calcium signaling pathway+++04080///Neuroactive ligand-receptor interaction	Organismal Systems+++Environmental Information Processing	Signaling molecules and interaction+++Immune system+++Signal transduction	-3.2432	1.5525e-08	2.03632e-07
	114207	Ryr1	mRNA	04020///Calcium signaling pathway+++04921///Oxytocin signaling pathway+++04713///Circadian entrainment+++04730///Long-term depression+++04371///Apelin signaling pathway	Organismal Systems+++Environmental Information Processing	Nervous system+++Endocrine system+++Signal transduction+++Environmental adaptation	-3.56583	1.00898e-196	3.49381e-194
	116601	Atp2a1	mRNA	04020///Calcium signaling pathway+++04972///Pancreatic secretion+++04022///cGMP-PKG signaling pathway	Organismal Systems+++Environmental Information Processing	Digestive system+++Signal transduction	-5.23013	0	0
	117558	Mylk2	mRNA	04020///Calcium signaling pathway+++04921///Oxytocin signaling pathway+++04971///Gastric acid secretion+++04510///Focal adhesion+++04810///Regulation of actin cytoskeleton+++04611///Platelet activation+++04022///cGMP-PKG signaling pathway+++04270///Vascular smooth muscle contraction+++04371///Apelin signaling pathway	Cellular Processes+++Organismal Systems+++Environmental Information Processing	Digestive system+++Cellular community - eukaryotes+++Endocrine system+++Circulatory system+++Cell motility+++Immune system+++Signal transduction	-3.85679	1.04412e-99	1.98853e-97
	29353	Phkg1	mRNA	04922///Glucagon signaling pathway+++04020///Calcium signaling pathway+++04910///Insulin signaling pathway	Organismal Systems+++Environmental Information Processing	Endocrine system+++Signal transduction	-1.87866	2.68837e-08	3.39297e-07
	296369	Tnnc2	mRNA	04020///Calcium signaling pathway	Environmental Information Processing	Signal transduction	-5.91177	0	0
	307100	Calml3	mRNA	04922///Glucagon signaling pathway+++04625///C-type lectin receptor signaling pathway+++04750///Inflammatory mediator regulation of TRP channels+++04020///Calcium signaling pathway+++04921///Oxytocin signaling pathway+++04971///Gastric acid secretion+++04713///Circadian entrainment+++04915///Estrogen signaling pathway+++04114///Oocyte meiosis+++04261///Adrenergic signaling in cardiomyocytes+++047…	Organismal Systems+++Cellular Processes+++Environmental Information Processing	Nervous system+++Cell growth and death+++Sensory system+++Digestive system+++Endocrine system+++Circulatory system+++Immune system+++Signal transduction+++Environmental adaptation	-2.43788	1.39646e-06	1.35208e-05
	682930	Cacna1s	mRNA	04723///Retrograde endocannabinoid signaling+++04020///Calcium signaling pathway+++04921///Oxytocin signaling pathway+++04261///Adrenergic signaling in cardiomyocytes+++04925///Aldosterone synthesis and secretion+++04010///MAPK signaling pathway+++04727///GABAergic synapse+++04725///Cholinergic synapse+++04924///Renin secretion+++04911///Insulin secretion+++04260///Cardiac muscle contraction+++04…	Organismal Systems+++Environmental Information Processing	Nervous system+++Endocrine system+++Circulatory system+++Signal transduction	-3.71682	1.32109e-106	2.70539e-104
Vascular smooth muscle contraction
	103689985	LOC103689985	mRNA	04020///Calcium signaling pathway+++04921///Oxytocin signaling pathway+++04971///Gastric acid secretion+++04510///Focal adhesion+++04810///Regulation of actin cytoskeleton+++04611///Platelet activation+++04022///cGMP-PKG signaling pathway+++04270///Vascular smooth muscle contraction+++04371///Apelin signaling pathway	Cellular Processes+++Organismal Systems+++Environmental Information Processing	Digestive system+++Cellular community - eukaryotes+++Endocrine system+++Circulatory system+++Cell motility+++Immune system+++Signal transduction	-3.9042	1.71603e-26	8.55545e-25
	117558	Mylk2	mRNA	04020///Calcium signaling pathway+++04921///Oxytocin signaling pathway+++04971///Gastric acid secretion+++04510///Focal adhesion+++04810///Regulation of actin cytoskeleton+++04611///Platelet activation+++04022///cGMP-PKG signaling pathway+++04270///Vascular smooth muscle contraction+++04371///Apelin signaling pathway	Cellular Processes+++Organismal Systems+++Environmental Information Processing	Digestive system+++Cellular community - eukaryotes+++Endocrine system+++Circulatory system+++Cell motility+++Immune system+++Signal transduction	-3.85679	1.04412e-99	1.98853e-97
	25365	Actg2	mRNA	04270///Vascular smooth muscle contraction	Organismal Systems	Circulatory system	-1.77068	1.61664e-24	7.27868e-23
	29747	Kcnmb1	mRNA	04911///Insulin secretion+++04022///cGMP-PKG signaling pathway+++04270///Vascular smooth muscle contraction	Organismal Systems+++Environmental Information Processing	Endocrine system+++Circulatory system+++Signal transduction	-0.73557	2.8137e-05	0.000211973
	307100	Calml3	mRNA	04922///Glucagon signaling pathway+++04625///C-type lectin receptor signaling pathway+++04750///Inflammatory mediator regulation of TRP channels+++04020///Calcium signaling pathway+++04921///Oxytocin signaling pathway+++04971///Gastric acid secretion+++04713///Circadian entrainment+++04915///Estrogen signaling pathway+++04114///Oocyte meiosis+++04261///Adrenergic signaling in cardiomyocytes+++047…	Organismal Systems+++Cellular Processes+++Environmental Information Processing	Nervous system+++Cell growth and death+++Sensory system+++Digestive system+++Endocrine system+++Circulatory system+++Immune system+++Signal transduction+++Environmental adaptation	-2.43788	1.39646e-06	1.35208e-05
	682930	Cacna1s	mRNA	04723///Retrograde endocannabinoid signaling+++04020///Calcium signaling pathway+++04921///Oxytocin signaling pathway+++04261///Adrenergic signaling in cardiomyocytes+++04925///Aldosterone synthesis and secretion+++04010///MAPK signaling pathway+++04727///GABAergic synapse+++04725///Cholinergic synapse+++04924///Renin secretion+++04911///Insulin secretion+++04260///Cardiac muscle contraction+++04…	Organismal Systems+++Environmental Information Processing	Nervous system+++Endocrine system+++Circulatory system+++Signal transduction	-3.71682	1.32109e-106	2.70539e-104
	81633	Acta2	mRNA	04926///Relaxin signaling pathway+++04270///Vascular smooth muscle contraction+++04371///Apelin signaling pathway	Organismal Systems+++Environmental Information Processing	Endocrine system+++Circulatory system+++Signal transduction	-0.652727	4.22377e-49	3.98226e-47
ECM-receptor interaction
	24477	Ibsp	mRNA	04510///Focal adhesion+++04512///ECM-receptor interaction+++04151///PI3K-Akt signaling pathway	Cellular Processes+++Environmental Information Processing	Cellular community - eukaryotes+++Signaling molecules and interaction+++Signal transduction	-1.74421	1.09558e-56	1.2131e-54
	25304	Comp	mRNA	04145///Phagosome+++04510///Focal adhesion+++04512///ECM-receptor interaction+++04151///PI3K-Akt signaling pathway	Cellular Processes+++Environmental Information Processing	Transport and catabolism+++Cellular community - eukaryotes+++Signaling molecules and interaction+++Signal transduction	-0.674322	2.6611e-22	1.07147e-20
	25412	Col2a1	mRNA	04974///Protein digestion and absorption+++04510///Focal adhesion+++04512///ECM-receptor interaction+++04151///PI3K-Akt signaling pathway	Organismal Systems+++Cellular Processes+++Environmental Information Processing	Digestive system+++Cellular community - eukaryotes+++Signaling molecules and interaction+++Signal transduction	-1.66991	0	0
	29195	Chad	mRNA	04510///Focal adhesion+++04512///ECM-receptor interaction+++04151///PI3K-Akt signaling pathway	Cellular Processes+++Environmental Information Processing	Cellular community - eukaryotes+++Signaling molecules and interaction+++Signal transduction	-1.47061	1.16517e-22	4.79278e-21
	304913	Tnn	mRNA	04510///Focal adhesion+++04512///ECM-receptor interaction+++04151///PI3K-Akt signaling pathway	Cellular Processes+++Environmental Information Processing	Cellular community - eukaryotes+++Signaling molecules and interaction+++Signal transduction	-1.76284	5.51941e-06	4.77155e-05
	305104	Col9a1	mRNA	04974///Protein digestion and absorption+++04510///Focal adhesion+++04512///ECM-receptor interaction+++04151///PI3K-Akt signaling pathway	Organismal Systems+++Cellular Processes+++Environmental Information Processing	Digestive system+++Cellular community - eukaryotes+++Signaling molecules and interaction+++Signal transduction	-0.629382	4.14185e-14	1.03113e-12
Oxytocin signaling pathway
	103689985	LOC103689985	mRNA	04020///Calcium signaling pathway+++04921///Oxytocin signaling pathway+++04971///Gastric acid secretion+++04510///Focal adhesion+++04810///Regulation of actin cytoskeleton+++04611///Platelet activation+++04022///cGMP-PKG signaling pathway+++04270///Vascular smooth muscle contraction+++04371///Apelin signaling pathway	Cellular Processes+++Organismal Systems+++Environmental Information Processing	Digestive system+++Cellular community - eukaryotes+++Endocrine system+++Circulatory system+++Cell motility+++Immune system+++Signal transduction	-3.9042	1.71603e-26	8.55545e-25
	114207	Ryr1	mRNA	04020///Calcium signaling pathway+++04921///Oxytocin signaling pathway+++04713///Circadian entrainment+++04730///Long-term depression+++04371///Apelin signaling pathway	Organismal Systems+++Environmental Information Processing	Nervous system+++Endocrine system+++Signal transduction+++Environmental adaptation	-3.56583	1.00898e-196	3.49381e-194
	117558	Mylk2	mRNA	04020///Calcium signaling pathway+++04921///Oxytocin signaling pathway+++04971///Gastric acid secretion+++04510///Focal adhesion+++04810///Regulation of actin cytoskeleton+++04611///Platelet activation+++04022///cGMP-PKG signaling pathway+++04270///Vascular smooth muscle contraction+++04371///Apelin signaling pathway	Cellular Processes+++Organismal Systems+++Environmental Information Processing	Digestive system+++Cellular community - eukaryotes+++Endocrine system+++Circulatory system+++Cell motility+++Immune system+++Signal transduction	-3.85679	1.04412e-99	1.98853e-97
	140727	Cacng6	mRNA	04921///Oxytocin signaling pathway+++04261///Adrenergic signaling in cardiomyocytes+++04010///MAPK signaling pathway+++04260///Cardiac muscle contraction	Organismal Systems+++Environmental Information Processing	Endocrine system+++Circulatory system+++Signal transduction	-1.8358	4.0631e-05	0.0002949
	29658	Cacng1	mRNA	04921///Oxytocin signaling pathway+++04261///Adrenergic signaling in cardiomyocytes+++04010///MAPK signaling pathway+++04260///Cardiac muscle contraction	Organismal Systems+++Environmental Information Processing	Endocrine system+++Circulatory system+++Signal transduction	-6.16723	1.30744e-18	4.38382e-17
	301518	Prkag3	mRNA	04213///Longevity regulating pathway - multiple species+++04714///Thermogenesis+++04922///Glucagon signaling pathway+++04921///Oxytocin signaling pathway+++04710///Circadian rhythm+++04920///Adipocytokine signaling pathway+++04530///Tight junction+++04211///Longevity regulating pathway+++04068///FoxO signaling pathway+++04910///Insulin signaling pathway+++04152///AMPK signaling pathway+++04371///…	Cellular Processes+++Organismal Systems+++Environmental Information Processing	Cellular community - eukaryotes+++Aging+++Endocrine system+++Signal transduction+++Environmental adaptation	-2.27741	5.63593e-10	8.97461e-09
	307100	Calml3	mRNA	04922///Glucagon signaling pathway+++04625///C-type lectin receptor signaling pathway+++04750///Inflammatory mediator regulation of TRP channels+++04020///Calcium signaling pathway+++04921///Oxytocin signaling pathway+++04971///Gastric acid secretion+++04713///Circadian entrainment+++04915///Estrogen signaling pathway+++04114///Oocyte meiosis+++04261///Adrenergic signaling in cardiomyocytes+++047…	Organismal Systems+++Cellular Processes+++Environmental Information Processing	Nervous system+++Cell growth and death+++Sensory system+++Digestive system+++Endocrine system+++Circulatory system+++Immune system+++Signal transduction+++Environmental adaptation	-2.43788	1.39646e-06	1.35208e-05
	682930	Cacna1s	mRNA	04723///Retrograde endocannabinoid signaling+++04020///Calcium signaling pathway+++04921///Oxytocin signaling pathway+++04261///Adrenergic signaling in cardiomyocytes+++04925///Aldosterone synthesis and secretion+++04010///MAPK signaling pathway+++04727///GABAergic synapse+++04725///Cholinergic synapse+++04924///Renin secretion+++04911///Insulin secretion+++04260///Cardiac muscle contraction+++04…	Organismal Systems+++Environmental Information Processing	Nervous system+++Endocrine system+++Circulatory system+++Signal transduction	-3.71682	1.32109e-106	2.70539e-104
