# Supplementary material for: Expression Profiling of Contralateral Dorsal Root Ganglia of a Rat Model of Complex Regional Pain Syndrome Type-i Uncovers Potential Mechanisms Involved in Mirror-image Painexpression Profiling of Contralateral Dorsal Root Ganglia of a Rat Model of Complex Regional Pain Syndrome Type-i Uncovers Potential Mechanisms Involved in Mirror-image Pain
Source: Research Square preprint supplement (doi:10.21203/rs.3.rs-532136/v1), 2021-05-26
Supplement: Supplementary file 3 [file f05da29f7be1d6a37a00970c.xlsx]

## Sheet: Sheet1
Gene ID	Gene Symbol	CPIP1 Read Count	CPIP2 Read Count	CPIP3 Read Count	CPIP4 Read Count	Con1 Read Count	Con2 Read Count	Con3 Read Count	Con4 Read Count	log2 (CPIP_DEG_left / Sham_DEG_left)	Pvalue(CPIP_DEG_left / Sham_DEG_left)	Qvalue (CPIP_DEG_left / Sham_DEG_left)	KEGG Pathway Desc	GO_C Desc	GO_F Desc	GO_P Desc
317418	Tsr2	0	239.86	470.02	379.86	0	0.01	0	0	16.7363	3.10687e-50	3.05001e-48		GO:0005634///nucleus		GO:0000462///maturation of SSU-rRNA from tricistronic rRNA transcript (SSU-rRNA, 5.8S rRNA, LSU-rRNA)
100912618	LOC100912618	0	61.85	0	21.07	0	0	0	0.05	10.6983	7.30683e-14	1.77047e-12	04624///Toll and Imd signaling pathway	GO:0005634///nucleus+++GO:0005575///cellular_component	GO:0003674///molecular_function+++GO:0061631///ubiquitin conjugating enzyme activity	GO:0070534///protein K63-linked ubiquitination+++GO:0006301///postreplication repair+++GO:0008150///biological_process
100910581	LOC100910581	119	0	65.54	92	0	0	0	0	9.11404	5.7932e-53	5.99627e-51			GO:0019902///phosphatase binding	GO:0010923///negative regulation of phosphatase activity
300802	Aph1b	0	0	121.81	96.21	0	0	0	0	8.77101	7.20417e-44	5.96537e-42	04330///Notch signaling pathway	GO:0070765///gamma-secretase complex+++GO:0005783///endoplasmic reticulum+++GO:0005575///cellular_component+++GO:0016021///integral component of membrane+++GO:0005887///integral component of plasma membrane+++GO:0016020///membrane+++GO:0030133///transport vesicle	GO:0004175///endopeptidase activity+++GO:0008233///peptidase activity+++GO:0003674///molecular_function	GO:0007220///Notch receptor processing+++GO:0007626///locomotory behavior+++GO:0043085///positive regulation of catalytic activity+++GO:0016485///protein processing+++GO:0007219///Notch signaling pathway
103691556	LOC103691556	0	3.78	0	272.78	0	1.25	0	0.17	7.60825	6.939e-62	8.58139e-60	04550///Signaling pathways regulating pluripotency of stem cells+++04350///TGF-beta signaling pathway	GO:0005634///nucleus+++GO:0005667///transcription factor complex+++GO:0005737///cytoplasm	GO:0003677///DNA binding+++GO:0003700///DNA-binding transcription factor activity	GO:0006355///regulation of transcription, DNA-templated+++GO:0007179///transforming growth factor beta receptor signaling pathway
102550456	LOC102550456	70.49	0	0	0	0	0	0	0	7.14204	1.4739e-17	4.64742e-16		GO:0005634///nucleus+++GO:0005737///cytoplasm	GO:0003700///DNA-binding transcription factor activity	GO:0006355///regulation of transcription, DNA-templated
108349606	LOC108349606	0	32.58	0	18.99	0	0	0	0	6.69115	1.46661e-13	3.43141e-12		GO:1990904///ribonucleoprotein complex+++GO:0022625///cytosolic large ribosomal subunit	GO:0003723///RNA binding	GO:0006412///translation+++GO:0042254///ribosome biogenesis+++GO:0000470///maturation of LSU-rRNA
100909868	LOC100909868	2	0	1	0	0	0	0.03	0	6.64655	0.0743752	0.18403		GO:0042383///sarcolemma+++GO:0005856///cytoskeleton+++GO:0030018///Z disc	GO:0003779///actin binding+++GO:0051393///alpha-actinin binding
100911233	LOC100911233	0	13.86	20.69	8.1	0	0	0	0	6.41717	1.39041e-11	2.65068e-10		GO:0048471///perinuclear region of cytoplasm+++GO:0005641///nuclear envelope lumen	GO:0000980///RNA polymerase II distal enhancer sequence-specific DNA binding+++GO:0003714///transcription corepressor activity+++GO:0030374///nuclear receptor transcription coactivator activity+++GO:0003713///transcription coactivator activity	GO:0006915///apoptotic process+++GO:0007049///cell cycle+++GO:0030335///positive regulation of cell migration+++GO:0008284///positive regulation of cell proliferation+++GO:0043065///positive regulation of apoptotic process+++GO:0006351///transcription, DNA-templated+++GO:0006355///regulation of transcription, DNA-templated
100912399	LOC100912399	13.04	9.9	18.72	0	0	0	0	0	6.38328	2.32736e-11	4.33704e-10	04530///Tight junction+++04722///Neurotrophin signaling pathway+++04010///MAPK signaling pathway+++04120///Ubiquitin mediated proteolysis+++04622///RIG-I-like receptor signaling pathway+++04912///GnRH signaling pathway	GO:0016020///membrane+++GO:0005737///cytoplasm	GO:0005524///ATP binding+++GO:0008270///zinc ion binding+++GO:0004672///protein kinase activity	GO:0006468///protein phosphorylation
684969	Potef	0	0	17.74	21.2	0	0	0	0	6.28587	9.69124e-11	1.67943e-09	04210///Apoptosis+++04391///Hippo signaling pathway - fly+++04670///Leukocyte transendothelial migration+++04714///Thermogenesis+++04520///Adherens junction+++04390///Hippo signaling pathway+++04921///Oxytocin signaling pathway+++04015///Rap1 signaling pathway+++04611///Platelet activation+++04745///Phototransduction - fly+++04145///Phagosome+++04919///Thyroid hormone signaling pathway+++04510///…	GO:0005925///focal adhesion+++GO:0005856///cytoskeleton+++GO:0005886///plasma membrane+++GO:0097433///dense body	GO:0005524///ATP binding
100910616	Hmgn5	0	11.41	15.97	3.96	0	0	0	0	5.97263	5.7355e-09	7.99068e-08		GO:0005634///nucleus+++GO:0000785///chromatin	GO:0031492///nucleosomal DNA binding	GO:0006355///regulation of transcription, DNA-templated+++GO:0006351///transcription, DNA-templated+++GO:0006325///chromatin organization
108348106	LOC108348106	0	0	23.96	0	0	0	0	0	5.58525	3.5258e-07	3.77665e-06		GO:0005925///focal adhesion+++GO:0005634///nucleus+++GO:0005737///cytoplasm+++GO:0005654///nucleoplasm	GO:0008198///ferrous iron binding+++GO:0051213///dioxygenase activity
100909795	LOC100909795	0	0	0	22.59	0	0	0	0	5.50031	7.72521e-07	7.80926e-06		GO:0005654///nucleoplasm+++GO:0005634///nucleus+++GO:0005886///plasma membrane+++GO:0005829///cytosol+++GO:0030027///lamellipodium+++GO:0005737///cytoplasm	GO:0038023///signaling receptor activity	GO:0010633///negative regulation of epithelial cell migration+++GO:0016055///Wnt signaling pathway+++GO:0045184///establishment of protein localization+++GO:0090090///negative regulation of canonical Wnt signaling pathway+++GO:0007165///signal transduction+++GO:0050680///negative regulation of epithelial cell proliferation
100911564	LOC100911564	5.9	10.35	4.76	0	0	0	0	0	5.3957	1.92542e-06	1.82073e-05	00260///Glycine, serine and threonine metabolism	GO:0005829///cytosol	GO:0016740///transferase activity+++GO:0042802///identical protein binding+++GO:0016594///glycine binding+++GO:1904047///S-adenosyl-L-methionine binding+++GO:0008168///methyltransferase activity+++GO:0017174///glycine N-methyltransferase activity	GO:0006730///one-carbon metabolic process+++GO:0032259///methylation+++GO:0046500///S-adenosylmethionine metabolic process+++GO:0006111///regulation of gluconeogenesis+++GO:0051289///protein homotetramerization+++GO:1901052///sarcosine metabolic process+++GO:0046498///S-adenosylhomocysteine metabolic process
100361265	LOC100361265	20.33	14.16	0.97	4	1	0	0	0	5.30501	7.18098e-11	1.25816e-09
690146	RGD1584023	10.05	0	5.98	0	0	0	0	0	5.0054	3.66156e-05	0.000268313		GO:0005622///intracellular	GO:0003676///nucleic acid binding+++GO:0046872///metal ion binding+++GO:0003700///DNA-binding transcription factor activity	GO:0006355///regulation of transcription, DNA-templated
297402	RGD1560795	7.78	0	7.84	0	0	0	0	0	4.96802	4.68962e-05	0.000336399	01100///Metabolic pathways+++00790///Folate biosynthesis	GO:0005737///cytoplasm	GO:0004757///sepiapterin reductase activity	GO:0006729///tetrahydrobiopterin biosynthetic process+++GO:0055114///oxidation-reduction process
102552708	LOC102552708	6.88	4.82	2.97	0	0	0	0	0	4.87749	8.34724e-05	0.000564135		GO:0016591///RNA polymerase II, holoenzyme	GO:0003899///DNA-directed 5'-3' RNA polymerase activity	GO:0051685///maintenance of ER location
100911713	LOC100911713	0	0	0	13.36	0	0	0	0	4.74254	0.000186275	0.00116583		GO:0005737///cytoplasm+++GO:0016607///nuclear speck		GO:0048593///camera-type eye morphogenesis+++GO:0009791///post-embryonic development+++GO:0050890///cognition+++GO:0014819///regulation of skeletal muscle contraction+++GO:0021678///third ventricle development+++GO:0036343///psychomotor behavior+++GO:0021540///corpus callosum morphogenesis
100911814	LOC100911814	3.85	0	0	8.37	0	0	0	0	4.61387	0.000377436	0.00219892		GO:0005634///nucleus+++GO:0005960///glycine cleavage complex+++GO:0005739///mitochondrion+++GO:0005886///plasma membrane	GO:0030170///pyridoxal phosphate binding+++GO:0019899///enzyme binding+++GO:0004375///glycine dehydrogenase (decarboxylating) activity+++GO:0016829///lyase activity+++GO:0046983///protein dimerization activity+++GO:0070280///pyridoxal binding+++GO:0016594///glycine binding+++GO:0042803///protein homodimerization activity	GO:1990830///cellular response to leukemia inhibitory factor+++GO:0036255///response to methylamine+++GO:0006546///glycine catabolic process+++GO:0019464///glycine decarboxylation via glycine cleavage system+++GO:1903442///response to lipoic acid
207119	Rin1	0.88	0	10.14	0.88	0	0	0	0	4.57558	0.000460801	0.00261111	04014///Ras signaling pathway	GO:0016020///membrane+++GO:0005737///cytoplasm+++GO:0005856///cytoskeleton	GO:0005096///GTPase activator activity	GO:0007165///signal transduction+++GO:0043547///positive regulation of GTPase activity+++GO:0006897///endocytosis
24421	Gsta1	0	0	11.68	0	0	0	0	0	4.54866	0.000528752	0.00294361	00980///Metabolism of xenobiotics by cytochrome P450+++00480///Glutathione metabolism+++00983///Drug metabolism - other enzymes+++00982///Drug metabolism - cytochrome P450	GO:0005829///cytosol+++GO:0005634///nucleus+++GO:0005640///nuclear outer membrane	GO:0004364///glutathione transferase activity+++GO:0008144///drug binding+++GO:0043295///glutathione binding	GO:0042493///response to drug+++GO:0042178///xenobiotic catabolic process+++GO:0031667///response to nutrient levels+++GO:0007568///aging
100910240	LOC100910240	0	8.28	0	3.22	0	0	0	0	4.52626	0.000591865	0.00325312	04210///Apoptosis	GO:0005634///nucleus+++GO:0043005///neuron projection+++GO:0030496///midbody+++GO:0005856///cytoskeleton+++GO:0030027///lamellipodium+++GO:0005886///plasma membrane+++GO:0044297///cell body+++GO:0005737///cytoplasm	GO:0004725///protein tyrosine phosphatase activity+++GO:0036312///phosphatidylinositol 3-kinase regulatory subunit binding	GO:0014066///regulation of phosphatidylinositol 3-kinase signaling+++GO:0006470///protein dephosphorylation+++GO:0035335///peptidyl-tyrosine dephosphorylation
81828	Zp2	0	1	0	21	0	1	0	0	4.46212	2.17436e-06	2.03392e-05		GO:0005576///extracellular region+++GO:0005886///plasma membrane+++GO:0062023///collagen-containing extracellular matrix+++GO:0005783///endoplasmic reticulum+++GO:0005771///multivesicular body+++GO:0016020///membrane+++GO:0016021///integral component of membrane	GO:0042802///identical protein binding+++GO:0032190///acrosin binding	GO:0060468///prevention of polyspermy+++GO:0007339///binding of sperm to zona pellucida+++GO:0007338///single fertilization
100911804	LOC100911804	6	1.94	0.64	1	0	0	0	0	4.26272	0.00199569	0.00944062		GO:0005576///extracellular region	GO:0008289///lipid binding	GO:0042157///lipoprotein metabolic process+++GO:0006869///lipid transport
100912489	LOC100912489	6.91	0	0	0.91	0.41	0	0	0	4.25617	0.00524757	0.021618		GO:0000786///nucleosome+++GO:0005634///nucleus	GO:0003677///DNA binding+++GO:0046982///protein heterodimerization activity	GO:0006334///nucleosome assembly+++GO:0006352///DNA-templated transcription, initiation
100912564	LOC100912564	6.91	0	0	0.91	0.41	0	0	0	4.25617	0.00524757	0.021618		GO:0000786///nucleosome+++GO:0005634///nucleus	GO:0003677///DNA binding+++GO:0046982///protein heterodimerization activity	GO:0006334///nucleosome assembly+++GO:0006352///DNA-templated transcription, initiation
502913	Hist2h4a	6.91	0	0	0.91	0.41	0	0	0	4.25617	0.00524757	0.021618		GO:0005634///nucleus+++GO:0000786///nucleosome	GO:0046982///protein heterodimerization activity+++GO:0003677///DNA binding	GO:0006352///DNA-templated transcription, initiation+++GO:0006334///nucleosome assembly
100361850	LOC100361850	9	0	0	0	0	0	0	0	4.17262	0.00289503	0.0130345		GO:0005654///nucleoplasm+++GO:0015629///actin cytoskeleton	GO:0003723///RNA binding+++GO:0003677///DNA binding+++GO:0046872///metal ion binding+++GO:0000981///DNA-binding transcription factor activity, RNA polymerase II-specific+++GO:0003700///DNA-binding transcription factor activity	GO:0007275///multicellular organism development+++GO:0006355///regulation of transcription, DNA-templated+++GO:0006351///transcription, DNA-templated
100909964	LOC100909964	0	9	0	0	0	0	0	0	4.17262	0.00289503	0.0130345		GO:0016021///integral component of membrane+++GO:0016020///membrane
103692699	LOC103692699	2	1	4	2	0	0	0	0	4.17262	0.00289503	0.0130345
103694404	LOC103694404	0	2.38	2.41	3.78	0	0	0	0	4.10199	0.00382032	0.0165059	03010///Ribosome	GO:0005829///cytosol+++GO:0005615///extracellular space+++GO:0042788///polysomal ribosome+++GO:0022625///cytosolic large ribosomal subunit	GO:0003735///structural constituent of ribosome+++GO:0003723///RNA binding	GO:0006412///translation+++GO:0061844///antimicrobial humoral immune response mediated by antimicrobial peptide+++GO:0002181///cytoplasmic translation+++GO:0050830///defense response to Gram-positive bacterium+++GO:0006413///translational initiation+++GO:0000184///nuclear-transcribed mRNA catabolic process, nonsense-mediated decay+++GO:0006614///SRP-dependent cotranslational protein targeting to …
108348231	LOC108348231	3.92	2.12	0	2	0	0	0	0	4.00989	0.00538735	0.0220982		GO:0005829///cytosol+++GO:0005615///extracellular space+++GO:0005634///nucleus	GO:0005009///insulin-activated receptor activity+++GO:0005550///pheromone binding+++GO:0036094///small molecule binding	GO:0010888///negative regulation of lipid storage+++GO:0045475///locomotor rhythm+++GO:0070584///mitochondrion morphogenesis+++GO:0051897///positive regulation of protein kinase B signaling+++GO:0045892///negative regulation of transcription, DNA-templated+++GO:0010907///positive regulation of glucose metabolic process+++GO:0061179///negative regulation of insulin secretion involved in cellular r…
498911	Mt4	1	2	2	3	0	0	0	0	4.00269	0.00552941	0.0225401		GO:0005737///cytoplasm+++GO:0005634///nucleus	GO:0046872///metal ion binding	GO:0006875///cellular metal ion homeostasis+++GO:0071280///cellular response to copper ion+++GO:0071294///cellular response to zinc ion+++GO:0071276///cellular response to cadmium ion+++GO:0006882///cellular zinc ion homeostasis+++GO:0010273///detoxification of copper ion
108351339	LOC108351339	5.96	0	0	2.01	0	0	0	0	3.99727	0.00563845	0.0228916			GO:0003676///nucleic acid binding+++GO:0004523///RNA-DNA hybrid ribonuclease activity+++GO:0004190///aspartic-type endopeptidase activity	GO:0015074///DNA integration
364991	Slc25a36l1	0	28.43	17.21	0	0	0	2.92	0	3.96895	3.85623e-11	6.98116e-10		GO:0005739///mitochondrion+++GO:0016021///integral component of membrane+++GO:0005743///mitochondrial inner membrane	GO:0015218///pyrimidine nucleotide transmembrane transporter activity	GO:0000002///mitochondrial genome maintenance+++GO:0006864///pyrimidine nucleotide transport+++GO:1990519///pyrimidine nucleotide import into mitochondrion+++GO:0007005///mitochondrion organization+++GO:0006839///mitochondrial transport+++GO:0051881///regulation of mitochondrial membrane potential
103691102	C1H19orf84	1	2	1	3	0	0	0	0	3.81005	0.0106426	0.0390049
24346	Ces1c	0	1	5	1	0	0	0	0	3.81005	0.0106426	0.0390049	00983///Drug metabolism - other enzymes+++01100///Metabolic pathways	GO:0005615///extracellular space+++GO:0005783///endoplasmic reticulum+++GO:0005788///endoplasmic reticulum lumen	GO:0052689///carboxylic ester hydrolase activity+++GO:0004806///triglyceride lipase activity+++GO:0016787///hydrolase activity+++GO:0004771///sterol esterase activity	GO:0016042///lipid catabolic process
362629	Il22ra1	0	2	2	3	0	0	0	0	3.81005	0.0106426	0.0390049	04630///Jak-STAT signaling pathway+++04060///Cytokine-cytokine receptor interaction	GO:0005575///cellular_component+++GO:0005886///plasma membrane+++GO:0016020///membrane+++GO:0016021///integral component of membrane	GO:0003674///molecular_function+++GO:0042015///interleukin-20 binding	GO:0050829///defense response to Gram-negative bacterium+++GO:0019221///cytokine-mediated signaling pathway+++GO:0008150///biological_process
685849	LOC685849	1	1	2	3	0	0	0	0	3.81005	0.0106426	0.0390049
24856	Ttr	31	2	35	1	3	1	1	0	3.78929	1.20151e-15	3.36017e-14	04918///Thyroid hormone synthesis	GO:0032991///protein-containing complex+++GO:0005615///extracellular space+++GO:0005576///extracellular region	GO:0070324///thyroid hormone binding+++GO:0005179///hormone activity+++GO:0042802///identical protein binding+++GO:0042562///hormone binding+++GO:0046982///protein heterodimerization activity	GO:0042572///retinol metabolic process+++GO:0042403///thyroid hormone metabolic process+++GO:0070327///thyroid hormone transport+++GO:0010469///regulation of signaling receptor activity
300054	Foxh1	0	2.43	1.16	2.45	0	0	0	0	3.59724	0.0201124	0.0658031		GO:0000790///nuclear chromatin+++GO:0032444///activin responsive factor complex+++GO:0005667///transcription factor complex+++GO:0005634///nucleus	GO:0070412///R-SMAD binding+++GO:0044212///transcription regulatory region DNA binding+++GO:0003700///DNA-binding transcription factor activity+++GO:0019904///protein domain specific binding+++GO:0043425///bHLH transcription factor binding+++GO:0046332///SMAD binding+++GO:0003677///DNA binding+++GO:0001228///DNA-binding transcription activator activity, RNA polymerase II-specific+++GO:0043565///s…	GO:0033147///negative regulation of intracellular estrogen receptor signaling pathway+++GO:0007179///transforming growth factor beta receptor signaling pathway+++GO:0001947///heart looping+++GO:0045893///positive regulation of transcription, DNA-templated+++GO:0003215///cardiac right ventricle morphogenesis+++GO:0003139///secondary heart field specification+++GO:0035054///embryonic heart tube ant…
114105	Cxcl2	0	0	0	6	0	0	0	0	3.58766	0.0206565	0.067237	04060///Cytokine-cytokine receptor interaction+++04657///IL-17 signaling pathway+++04062///Chemokine signaling pathway+++04621///NOD-like receptor signaling pathway+++04668///TNF signaling pathway	GO:0005576///extracellular region+++GO:0005623///cell+++GO:0005615///extracellular space	GO:0008009///chemokine activity+++GO:0005125///cytokine activity	GO:0061844///antimicrobial humoral immune response mediated by antimicrobial peptide+++GO:0006954///inflammatory response+++GO:0010469///regulation of signaling receptor activity+++GO:0002237///response to molecule of bacterial origin+++GO:0071222///cellular response to lipopolysaccharide+++GO:0006955///immune response+++GO:0051384///response to glucocorticoid+++GO:0030595///leukocyte chemotaxis+…
25110	Klrd1	4	2	3	3	1	0	0	0	3.58766	0.00106496	0.00545805	04650///Natural killer cell mediated cytotoxicity+++04612///Antigen processing and presentation	GO:0016020///membrane+++GO:0043235///receptor complex+++GO:0016021///integral component of membrane+++GO:0005575///cellular_component	GO:0003674///molecular_function+++GO:0023030///MHC class Ib protein binding, via antigen binding groove+++GO:1990405///protein antigen binding+++GO:0023024///MHC class I protein complex binding+++GO:0030246///carbohydrate binding	GO:0002228///natural killer cell mediated immunity+++GO:0008150///biological_process
103691013	LOC103691013	0	2	1.93	2.06	0	0	0	0	3.58525	0.0207949	0.067595		GO:0005622///intracellular		GO:0048812///neuron projection morphogenesis+++GO:0014065///phosphatidylinositol 3-kinase signaling
679149	LOC679149	9.74	2	10.01	1	1	1	0	0	3.51049	7.86975e-06	6.58521e-05	00983///Drug metabolism - other enzymes	GO:0005615///extracellular space	GO:0016787///hydrolase activity+++GO:0052689///carboxylic ester hydrolase activity
108348195	LOC108348195	1.33	2.94	1.36	0	0	0	0	0	3.49583	0.0264614	0.0816125		GO:0005886///plasma membrane+++GO:0016021///integral component of membrane	GO:0016503///pheromone receptor activity	GO:0045925///positive regulation of female receptivity+++GO:0019236///response to pheromone
103690061	LOC103690061	0	1.33	0	4.23	0	0	0	0	3.47778	0.0277347	0.0848527		GO:0005887///integral component of plasma membrane	GO:0005328///neurotransmitter:sodium symporter activity+++GO:0015193///L-proline transmembrane transporter activity	GO:0015824///proline transport
260324	Ly49i2	1	1.4	3	0	0	0	0	0	3.43565	0.0308856	0.0922403		GO:0016020///membrane+++GO:0016021///integral component of membrane	GO:0030246///carbohydrate binding	GO:0009968///negative regulation of signal transduction
689484	Frg1l1	4.06	0	0	0	0	0.38	0	0	3.4201	0.061732	0.159653		GO:0055120///striated muscle dense body+++GO:0071013///catalytic step 2 spliceosome+++GO:0005730///nucleolus	GO:0051015///actin filament binding	GO:0008380///RNA splicing+++GO:0006397///mRNA processing+++GO:0006364///rRNA processing+++GO:0007517///muscle organ development
100910107	LOC100910107	2.14	2.14	1	0	0	0	0	0	3.40323	0.0334871	0.0983592			GO:0036459///thiol-dependent ubiquitinyl hydrolase activity	GO:0016579///protein deubiquitination+++GO:0006511///ubiquitin-dependent protein catabolic process
102551539	LOC102551539	0	0	0	12.3	1.2	0	0	0	3.36025	0.00124595	0.00624946		GO:0005634///nucleus	GO:0046872///metal ion binding+++GO:0003676///nucleic acid binding	GO:0006355///regulation of transcription, DNA-templated
286914	Vom2r27	1.03	1.98	2	4.99	0	0	0.99	0	3.33912	0.00369571	0.0160623		GO:0005886///plasma membrane+++GO:0005887///integral component of plasma membrane+++GO:0016021///integral component of membrane+++GO:0016020///membrane	GO:0004930///G protein-coupled receptor activity	GO:0007165///signal transduction+++GO:0007186///G protein-coupled receptor signaling pathway
100912038	LOC100912038	3	2.03	0	0	0	0	0	0	3.33325	0.0396503	0.112506		GO:0070652///HAUS complex+++GO:0005815///microtubule organizing center+++GO:0005874///microtubule+++GO:0000922///spindle pole+++GO:0005737///cytoplasm		GO:0007098///centrosome cycle+++GO:0051301///cell division+++GO:0051225///spindle assembly
102552324	LOC102552324	1	2	1	1	0	0	0	0	3.32462	0.0404641	0.114228
24620	Reg3g	0	0	5	0	0	0	0	0	3.32462	0.0404641	0.114228		GO:0005615///extracellular space+++GO:0030141///secretory granule+++GO:0044216///other organism cell+++GO:0005737///cytoplasm+++GO:0005576///extracellular region	GO:0004888///transmembrane signaling receptor activity+++GO:0070492///oligosaccharide binding+++GO:0042834///peptidoglycan binding+++GO:0030246///carbohydrate binding	GO:0044278///cell wall disruption in other organism+++GO:0008284///positive regulation of cell proliferation+++GO:0045617///negative regulation of keratinocyte differentiation+++GO:0010838///positive regulation of keratinocyte proliferation+++GO:0050830///defense response to Gram-positive bacterium+++GO:0050829///defense response to Gram-negative bacterium+++GO:0006954///inflammatory response+++G…
24933	Klra22	2	1	1	1	0	0	0	0	3.32462	0.0404641	0.114228		GO:0016021///integral component of membrane+++GO:0016020///membrane	GO:0030246///carbohydrate binding	GO:0007155///cell adhesion
299279	RGD1565462	0	1	1	3	0	0	0	0	3.32462	0.0404641	0.114228		GO:0005615///extracellular space	GO:0004867///serine-type endopeptidase inhibitor activity	GO:0009617///response to bacterium+++GO:0034097///response to cytokine+++GO:0043434///response to peptide hormone
305840	Rnase10	1	0	0	4	0	0	0	0	3.32462	0.0404641	0.114228		GO:0005576///extracellular region	GO:0003676///nucleic acid binding+++GO:0004540///ribonuclease activity	GO:0007338///single fertilization+++GO:0007155///cell adhesion+++GO:0090501///RNA phosphodiester bond hydrolysis+++GO:0034113///heterotypic cell-cell adhesion+++GO:0080154///regulation of fertilization+++GO:0022409///positive regulation of cell-cell adhesion+++GO:1902093///positive regulation of flagellated sperm motility
366568	Slc30a3	4	0	5	1	0	0	1	0	3.32462	0.00375915	0.0162952		GO:0030054///cell junction+++GO:0098978///glutamatergic synapse+++GO:0045202///synapse+++GO:0005765///lysosomal membrane+++GO:0005770///late endosome+++GO:0031902///late endosome membrane+++GO:0016021///integral component of membrane+++GO:0005764///lysosome+++GO:0098686///hippocampal mossy fiber to CA3 synapse+++GO:0043005///neuron projection+++GO:0008021///synaptic vesicle+++GO:0030672///synapti…	GO:0005385///zinc ion transmembrane transporter activity+++GO:0008324///cation transmembrane transporter activity	GO:0051050///positive regulation of transport+++GO:0006812///cation transport+++GO:0099180///zinc ion import into synaptic vesicle+++GO:0006829///zinc ion transport+++GO:0055085///transmembrane transport+++GO:0010043///response to zinc ion+++GO:0071577///zinc ion transmembrane transport+++GO:0006811///ion transport+++GO:0061088///regulation of sequestering of zinc ion
494210	Ly49i7	0	1	3	1	0	0	0	0	3.32462	0.0404641	0.114228		GO:0016021///integral component of membrane+++GO:0016020///membrane	GO:0030246///carbohydrate binding	GO:0007155///cell adhesion
503651	Klri1	3	1	1	5	0	1	0	0	3.32462	0.00375915	0.0162952		GO:0005886///plasma membrane+++GO:0016021///integral component of membrane+++GO:0016020///membrane+++GO:0005887///integral component of plasma membrane	GO:0030246///carbohydrate binding
300303	LOC300303	2.97	0	0	0	0	0	0.26	0.05	3.26282	0.11723	0.257662		GO:0015935///small ribosomal subunit+++GO:0001652///granular component+++GO:0005654///nucleoplasm+++GO:0005737///cytoplasm+++GO:0005813///centrosome+++GO:0005730///nucleolus+++GO:0005829///cytosol+++GO:0016607///nuclear speck+++GO:0016363///nuclear matrix+++GO:0005634///nucleus+++GO:0015934///large ribosomal subunit	GO:0004860///protein kinase inhibitor activity+++GO:0051059///NF-kappaB binding+++GO:0047485///protein N-terminus binding+++GO:0019899///enzyme binding+++GO:0003677///DNA binding+++GO:0051082///unfolded protein binding+++GO:0002039///p53 binding+++GO:0043422///protein kinase B binding+++GO:0005524///ATP binding+++GO:0019843///rRNA binding+++GO:0005547///phosphatidylinositol-3,4,5-trisphosphate bi…	GO:0008285///negative regulation of cell proliferation+++GO:0071394///cellular response to testosterone stimulus+++GO:0006407///rRNA export from nucleus+++GO:0009303///rRNA transcription+++GO:0000056///ribosomal small subunit export from nucleus+++GO:0042274///ribosomal small subunit biogenesis+++GO:0043066///negative regulation of apoptotic process+++GO:0043085///positive regulation of catalytic…
500338	Klrc3	6.53	5	2	5	0	1	1	0	3.21448	0.000101365	0.000672177	04612///Antigen processing and presentation	GO:0016020///membrane+++GO:0016021///integral component of membrane	GO:0030246///carbohydrate binding
60333	Msln	0	39	371	12	3	10	29	4	3.20023	1.58026e-76	2.33303e-74		GO:0005615///extracellular space+++GO:0005576///extracellular region+++GO:0009986///cell surface+++GO:0031225///anchored component of membrane+++GO:0005794///Golgi apparatus+++GO:0016020///membrane+++GO:0005886///plasma membrane	GO:0003674///molecular_function	GO:0031016///pancreas development+++GO:0007155///cell adhesion+++GO:0007160///cell-matrix adhesion
100912262	LOC100912262	0	19.82	0	14.9	0	0	3.84	0	3.17928	1.19005e-07	1.37778e-06	04022///cGMP-PKG signaling pathway+++03022///Basal transcription factors	GO:0005634///nucleus	GO:0003677///DNA binding+++GO:0003700///DNA-binding transcription factor activity	GO:0006366///transcription by RNA polymerase II+++GO:0006355///regulation of transcription, DNA-templated
103692449	LOC103692449	0.66	0	0.79	1.83	0	0	0	0.41	3.00269	0.113002	0.250831
302964	Bicdl2	2	1	4	1	1	0	0	0	3.00269	0.0133196	0.0469155		GO:0005737///cytoplasm	GO:0017137///Rab GTPase binding	GO:0055107///Golgi to secretory granule transport
108352634	LOC108352634	9.33	0.35	12.62	0.02	0.27	0.19	0.33	2.01	2.99753	3.61454e-05	0.000265173			GO:0019863///IgE binding+++GO:0003676///nucleic acid binding	GO:0015074///DNA integration+++GO:0016032///viral process
100911251	LOC100911251	4	4	4	3	0	0	1	1	2.90958	0.000845345	0.00446839
319105	Taar8c	0	0	2	0	0	0.27	0	0	2.89166	0.224387	0.407461	04080///Neuroactive ligand-receptor interaction	GO:0016021///integral component of membrane+++GO:0005886///plasma membrane+++GO:0016020///membrane	GO:0004930///G protein-coupled receptor activity+++GO:0001594///trace-amine receptor activity	GO:0007186///G protein-coupled receptor signaling pathway+++GO:0007165///signal transduction
100912019	LOC100912019	0	3.9	8.3	5.27	1.57	0	0	0.8	2.88461	0.000335276	0.00197995
289926	RGD1565725	0	3	3	1	0	1	0	0	2.81005	0.0250739	0.0782391		GO:0016021///integral component of membrane	GO:0005509///calcium ion binding	GO:0007156///homophilic cell adhesion via plasma membrane adhesion molecules
294197	Olr1743	1	2	2	2	0	0	1	0	2.81005	0.0250739	0.0782391	04740///Olfactory transduction	GO:0016020///membrane+++GO:0016021///integral component of membrane+++GO:0005886///plasma membrane	GO:0004930///G protein-coupled receptor activity+++GO:0004984///olfactory receptor activity	GO:0007165///signal transduction+++GO:0050896///response to stimulus+++GO:0007608///sensory perception of smell+++GO:0050911///detection of chemical stimulus involved in sensory perception of smell+++GO:0007186///G protein-coupled receptor signaling pathway
498109	Polr2h	47.42	154	107.59	167	0	25.42	51.42	0	2.63376	2.78742e-71	3.87492e-69	00230///Purine metabolism+++00240///Pyrimidine metabolism+++01100///Metabolic pathways+++04623///Cytosolic DNA-sensing pathway+++03020///RNA polymerase	GO:0005654///nucleoplasm+++GO:0005665///RNA polymerase II, core complex+++GO:0005666///RNA polymerase III complex+++GO:0005736///RNA polymerase I complex+++GO:0005634///nucleus+++GO:0005829///cytosol+++GO:0032993///protein-DNA complex	GO:0003899///DNA-directed 5'-3' RNA polymerase activity+++GO:0003697///single-stranded DNA binding	GO:0006361///transcription initiation from RNA polymerase I promoter+++GO:0006370///7-methylguanosine mRNA capping+++GO:0006383///transcription by RNA polymerase III+++GO:0000398///mRNA splicing, via spliceosome+++GO:0006367///transcription initiation from RNA polymerase II promoter+++GO:0045815///positive regulation of gene expression, epigenetic+++GO:0006368///transcription elongation from RNA …
295041	Stoml3	4.89	3.86	23.2	6	0	1.01	2.04	3.11	2.62579	4.84561e-07	5.05669e-06		GO:0016021///integral component of membrane+++GO:0005929///cilium+++GO:0016020///membrane+++GO:0045121///membrane raft	GO:0005515///protein binding	GO:0007165///signal transduction
100909830	LOC100909830	16.08	0	10.72	5.36	5.36	0	0	0	2.58766	4.31613e-06	3.81442e-05	03018///RNA degradation	GO:0016442///RISC complex+++GO:0030054///cell junction+++GO:0036464///cytoplasmic ribonucleoprotein granule+++GO:0000932///P-body+++GO:0005654///nucleoplasm	GO:0016787///hydrolase activity+++GO:0030145///manganese ion binding+++GO:0003723///RNA binding	GO:0071044///histone mRNA catabolic process+++GO:0006402///mRNA catabolic process+++GO:1904872///regulation of telomerase RNA localization to Cajal body+++GO:0000290///deadenylation-dependent decapping of nuclear-transcribed mRNA+++GO:0000184///nuclear-transcribed mRNA catabolic process, nonsense-mediated decay+++GO:0032211///negative regulation of telomere maintenance via telomerase
100911818	LOC100911818	1	0	3	2	0	1	0	0	2.58766	0.0471473	0.129123		GO:0016021///integral component of membrane
29680	Cyp11a1	3	0	1	2	0	1	0	0	2.58766	0.0471473	0.129123	04925///Aldosterone synthesis and secretion+++04913///Ovarian steroidogenesis+++00140///Steroid hormone biosynthesis+++01100///Metabolic pathways+++04927///Cortisol synthesis and secretion	GO:0030061///mitochondrial crista+++GO:0005743///mitochondrial inner membrane+++GO:0016020///membrane+++GO:0043204///perikaryon+++GO:0005739///mitochondrion	GO:0016705///oxidoreductase activity, acting on paired donors, with incorporation or reduction of molecular oxygen+++GO:0008386///cholesterol monooxygenase (side-chain-cleaving) activity+++GO:0004497///monooxygenase activity+++GO:0015485///cholesterol binding+++GO:0005506///iron ion binding+++GO:0020037///heme binding+++GO:0046872///metal ion binding+++GO:0016491///oxidoreductase activity	GO:0018963///phthalate metabolic process+++GO:0051591///response to cAMP+++GO:0071371///cellular response to gonadotropin stimulus+++GO:0071320///cellular response to cAMP+++GO:0033327///Leydig cell differentiation+++GO:0061370///testosterone biosynthetic process+++GO:0021766///hippocampus development+++GO:0051412///response to corticosterone+++GO:0071375///cellular response to peptide hormone st…
364680	Barx1	1	3	0	2	0	0	1	0	2.58766	0.0471473	0.129123		GO:0005634///nucleus	GO:0001228///DNA-binding transcription activator activity, RNA polymerase II-specific+++GO:0000977///RNA polymerase II regulatory region sequence-specific DNA binding+++GO:0043565///sequence-specific DNA binding+++GO:0003677///DNA binding	GO:0030178///negative regulation of Wnt signaling pathway+++GO:0009952///anterior/posterior pattern specification+++GO:0048536///spleen development+++GO:0006355///regulation of transcription, DNA-templated+++GO:0048856///anatomical structure development+++GO:0045944///positive regulation of transcription by RNA polymerase II+++GO:0007267///cell-cell signaling+++GO:0055123///digestive system devel…
366035	Wdr38	1	2	3	0	0	0	0	1	2.58766	0.0471473	0.129123				GO:0002244///hematopoietic progenitor cell differentiation
367944	Zic3	2	1	1	2	0	0	0	1	2.58766	0.0471473	0.129123	04550///Signaling pathways regulating pluripotency of stem cells	GO:0005654///nucleoplasm+++GO:0005575///cellular_component+++GO:0005634///nucleus+++GO:0005737///cytoplasm	GO:0000978///RNA polymerase II proximal promoter sequence-specific DNA binding+++GO:0000981///DNA-binding transcription factor activity, RNA polymerase II-specific+++GO:0003676///nucleic acid binding+++GO:0000977///RNA polymerase II regulatory region sequence-specific DNA binding+++GO:0001228///DNA-binding transcription activator activity, RNA polymerase II-specific+++GO:0003700///DNA-binding tra…	GO:0009952///anterior/posterior pattern specification+++GO:0045893///positive regulation of transcription, DNA-templated+++GO:0035545///determination of left/right asymmetry in nervous system+++GO:0035469///determination of pancreatic left/right asymmetry+++GO:0001947///heart looping+++GO:0006357///regulation of transcription by RNA polymerase II+++GO:0007368///determination of left/right symmetr…
100364561	LOC100364561	0	4.02	0	2.01	1.01	0	0	0	2.5805	0.0469348	0.12867		GO:0005634///nucleus+++GO:0005829///cytosol+++GO:0014069///postsynaptic density+++GO:0022627///cytosolic small ribosomal subunit+++GO:0005654///nucleoplasm+++GO:0005840///ribosome	GO:0003735///structural constituent of ribosome+++GO:0003723///RNA binding+++GO:0003677///DNA binding+++GO:0008270///zinc ion binding	GO:0000184///nuclear-transcribed mRNA catabolic process, nonsense-mediated decay+++GO:0000028///ribosomal small subunit assembly+++GO:0008283///cell proliferation+++GO:0006364///rRNA processing+++GO:0006413///translational initiation+++GO:0006412///translation+++GO:0006614///SRP-dependent cotranslational protein targeting to membrane
293347	Gvinp1	1.31	3.21	3	0	1.26	0	0	0	2.58	0.0265144	0.0817495		GO:0005829///cytosol+++GO:0005634///nucleus	GO:0005525///GTP binding
100909439	LOC100909439	10.79	0	0	5.06	0	0	0	2.68	2.56687	0.00131882	0.00657166		GO:0031466///Cul5-RING ubiquitin ligase complex	GO:0061630///ubiquitin protein ligase activity	GO:0016567///protein ubiquitination+++GO:0035556///intracellular signal transduction
100911156	LOC100911156	0	0	2.76	0	0.5	0	0	0	2.46736	0.189949	0.362883	00250///Alanine, aspartate and glutamate metabolism+++04146///Peroxisome	GO:0005829///cytosol+++GO:0005777///peroxisome	GO:0008445///D-aspartate oxidase activity+++GO:0071949///FAD binding+++GO:0005102///signaling receptor binding+++GO:0048037///cofactor binding	GO:0006531///aspartate metabolic process+++GO:0007625///grooming behavior+++GO:0006533///aspartate catabolic process+++GO:0007320///insemination+++GO:0042445///hormone metabolic process+++GO:0019478///D-amino acid catabolic process
304954	Uap1l2	9.56	24.79	5.52	24.76	0	0	0	11.74	2.46346	2.34307e-10	3.92815e-09	00520///Amino sugar and nucleotide sugar metabolism+++01130///Biosynthesis of antibiotics+++01100///Metabolic pathways	GO:0005886///plasma membrane+++GO:0005654///nucleoplasm+++GO:0005829///cytosol	GO:0030246///carbohydrate binding+++GO:0003977///UDP-N-acetylglucosamine diphosphorylase activity+++GO:0042802///identical protein binding	GO:0006047///UDP-N-acetylglucosamine metabolic process+++GO:0006048///UDP-N-acetylglucosamine biosynthetic process
315294	Wnt10b	2	2	18	0	1	2	1	0	2.46212	0.000218954	0.00134951	04150///mTOR signaling pathway+++04916///Melanogenesis+++04550///Signaling pathways regulating pluripotency of stem cells+++04310///Wnt signaling pathway+++04390///Hippo signaling pathway	GO:0005575///cellular_component+++GO:0005615///extracellular space+++GO:0005576///extracellular region	GO:0003674///molecular_function+++GO:0005102///signaling receptor binding+++GO:0005109///frizzled binding	GO:0008284///positive regulation of cell proliferation+++GO:0043403///skeletal muscle tissue regeneration+++GO:0051885///positive regulation of timing of anagen+++GO:0071425///hematopoietic stem cell proliferation+++GO:0045165///cell fate commitment+++GO:0045899///positive regulation of RNA polymerase II transcriptional preinitiation complex assembly+++GO:0006629///lipid metabolic process+++GO:00…
100910678	LOC100910678	32.83	10	0	12.89	0	0	0	10.19	2.45373	4.34149e-09	6.17042e-08				GO:0002181///cytoplasmic translation
100360880	Fosb	44	29	33	621	37	44	32	20	2.45322	8.98202e-100	1.7279e-97	04380///Osteoclast differentiation+++04657///IL-17 signaling pathway	GO:0005654///nucleoplasm+++GO:0005634///nucleus+++GO:0043231///intracellular membrane-bounded organelle	GO:0003700///DNA-binding transcription factor activity+++GO:0003677///DNA binding+++GO:0001228///DNA-binding transcription activator activity, RNA polymerase II-specific+++GO:0003690///double-stranded DNA binding+++GO:0000978///RNA polymerase II proximal promoter sequence-specific DNA binding+++GO:0043565///sequence-specific DNA binding	GO:0043278///response to morphine+++GO:0071277///cellular response to calcium ion+++GO:0007565///female pregnancy+++GO:0032870///cellular response to hormone stimulus+++GO:0051412///response to corticosterone+++GO:0006355///regulation of transcription, DNA-templated+++GO:0051591///response to cAMP+++GO:0009612///response to mechanical stimulus+++GO:0006357///regulation of transcription by RNA pol…
690082	LOC690082	4.08	0	0	0	0	0	0	0.81	2.33527	0.122772	0.266979
100365810	LOC100365810	0	16.87	48.98	27.43	16.78	0.49	1.28	0	2.33284	1.65036e-13	3.83774e-12	03010///Ribosome	GO:0022627///cytosolic small ribosomal subunit	GO:0003735///structural constituent of ribosome	GO:0000028///ribosomal small subunit assembly+++GO:0006412///translation
100362810	LOC100362810	1	2	1	1	0	1	0	0	2.32462	0.0884282	0.209038		GO:0005634///nucleus	GO:0003682///chromatin binding+++GO:0046872///metal ion binding+++GO:0042826///histone deacetylase binding+++GO:0000978///RNA polymerase II proximal promoter sequence-specific DNA binding	GO:0000122///negative regulation of transcription by RNA polymerase II+++GO:0045668///negative regulation of osteoblast differentiation+++GO:0030154///cell differentiation+++GO:0043433///negative regulation of DNA-binding transcription factor activity+++GO:0006351///transcription, DNA-templated
171371	Xcl1	3	1	0	1	0	0	1	0	2.32462	0.0884282	0.209038	04060///Cytokine-cytokine receptor interaction+++04062///Chemokine signaling pathway	GO:0005623///cell+++GO:0005615///extracellular space+++GO:0005576///extracellular region	GO:0042379///chemokine receptor binding+++GO:0048020///CCR chemokine receptor binding+++GO:0005125///cytokine activity+++GO:0008009///chemokine activity	GO:0002548///monocyte chemotaxis+++GO:0010820///positive regulation of T cell chemotaxis+++GO:0070098///chemokine-mediated signaling pathway+++GO:0071353///cellular response to interleukin-4+++GO:0051209///release of sequestered calcium ion into cytosol+++GO:0071346///cellular response to interferon-gamma+++GO:0006954///inflammatory response+++GO:0002726///positive regulation of T cell cytokine p…
289250	Olr1588	1	0	1	3	0	0	0	1	2.32462	0.0884282	0.209038	04740///Olfactory transduction	GO:0016020///membrane+++GO:0005886///plasma membrane+++GO:0016021///integral component of membrane	GO:0004930///G protein-coupled receptor activity+++GO:0004984///olfactory receptor activity	GO:0007608///sensory perception of smell+++GO:0050896///response to stimulus+++GO:0050911///detection of chemical stimulus involved in sensory perception of smell+++GO:0007165///signal transduction+++GO:0007186///G protein-coupled receptor signaling pathway
29531	Hpd	1	0	3	1	0	1	0	0	2.32462	0.0884282	0.209038	00360///Phenylalanine metabolism+++00130///Ubiquinone and other terpenoid-quinone biosynthesis+++00350///Tyrosine metabolism+++01100///Metabolic pathways	GO:0000139///Golgi membrane+++GO:0005794///Golgi apparatus+++GO:0005737///cytoplasm+++GO:0016020///membrane+++GO:0005789///endoplasmic reticulum membrane+++GO:0005783///endoplasmic reticulum	GO:0016491///oxidoreductase activity+++GO:0051213///dioxygenase activity+++GO:0016701///oxidoreductase activity, acting on single donors with incorporation of molecular oxygen+++GO:0046872///metal ion binding+++GO:0003868///4-hydroxyphenylpyruvate dioxygenase activity	GO:0009072///aromatic amino acid family metabolic process+++GO:0055114///oxidation-reduction process+++GO:0006572///tyrosine catabolic process+++GO:0006559///L-phenylalanine catabolic process
297698	Erp27	5	0	0	0	0	1	0	0	2.32462	0.0884282	0.209038		GO:0005783///endoplasmic reticulum	GO:0003756///protein disulfide isomerase activity+++GO:0031545///peptidyl-proline 4-dioxygenase activity	GO:0006457///protein folding+++GO:0034976///response to endoplasmic reticulum stress+++GO:1902175///regulation of oxidative stress-induced intrinsic apoptotic signaling pathway+++GO:0019511///peptidyl-proline hydroxylation
300458	Npsr1	1	0	1	3	1	0	0	0	2.32462	0.0884282	0.209038		GO:0016021///integral component of membrane+++GO:0005575///cellular_component+++GO:0005886///plasma membrane+++GO:0016020///membrane+++GO:0005887///integral component of plasma membrane	GO:0003674///molecular_function+++GO:0004930///G protein-coupled receptor activity+++GO:0008188///neuropeptide receptor activity+++GO:0005000///vasopressin receptor activity	GO:1903999///negative regulation of eating behavior+++GO:0007218///neuropeptide signaling pathway+++GO:0051281///positive regulation of release of sequestered calcium ion into cytosol+++GO:2000293///negative regulation of defecation+++GO:0060013///righting reflex+++GO:0070374///positive regulation of ERK1 and ERK2 cascade+++GO:0042755///eating behavior+++GO:0007165///signal transduction+++GO:0007…
305999	Nkx3-1	1	2	0	2	0	0	1	0	2.32462	0.0884282	0.209038		GO:0005634///nucleus+++GO:0090734///site of DNA damage	GO:0008134///transcription factor binding+++GO:0004882///androgen receptor activity+++GO:0008656///cysteine-type endopeptidase activator activity involved in apoptotic process+++GO:0003700///DNA-binding transcription factor activity+++GO:0000976///transcription regulatory region sequence-specific DNA binding+++GO:0000978///RNA polymerase II proximal promoter sequence-specific DNA binding+++GO:003…	GO:0006919///activation of cysteine-type endopeptidase activity involved in apoptotic process+++GO:0001756///somitogenesis+++GO:0008584///male gonad development+++GO:0035907///dorsal aorta development+++GO:0008284///positive regulation of cell proliferation+++GO:0010629///negative regulation of gene expression+++GO:0071383///cellular response to steroid hormone stimulus+++GO:0010942///positive re…
307556	Ccdc178	0	0	2	3	1	0	0	0	2.32462	0.0884282	0.209038
361342	Cplx4	3	1	0	1	1	0	0	0	2.32462	0.0884282	0.209038	04721///Synaptic vesicle cycle	GO:0045202///synapse+++GO:0031201///SNARE complex+++GO:0043195///terminal bouton	GO:0019905///syntaxin binding+++GO:0000149///SNARE binding	GO:0016079///synaptic vesicle exocytosis+++GO:0006836///neurotransmitter transport+++GO:0046928///regulation of neurotransmitter secretion
83790	Cyp2c23	0	2	0	3	0	0	0	1	2.32462	0.0884282	0.209038	00590///Arachidonic acid metabolism+++01100///Metabolic pathways+++00140///Steroid hormone biosynthesis+++04750///Inflammatory mediator regulation of TRP channels+++04726///Serotonergic synapse+++00591///Linoleic acid metabolism+++00830///Retinol metabolism	GO:0005783///endoplasmic reticulum+++GO:0005737///cytoplasm+++GO:0016020///membrane+++GO:0043231///intracellular membrane-bounded organelle+++GO:0031090///organelle membrane+++GO:0005789///endoplasmic reticulum membrane	GO:0016712///oxidoreductase activity, acting on paired donors, with incorporation or reduction of molecular oxygen, reduced flavin or flavoprotein as one donor, and incorporation of one atom of oxygen+++GO:0020037///heme binding+++GO:0008395///steroid hydroxylase activity+++GO:0046872///metal ion binding+++GO:0005506///iron ion binding+++GO:0016705///oxidoreductase activity, acting on paired dono…	GO:0055114///oxidation-reduction process+++GO:0019369///arachidonic acid metabolic process+++GO:0033574///response to testosterone+++GO:0006805///xenobiotic metabolic process+++GO:0042738///exogenous drug catabolic process+++GO:0006082///organic acid metabolic process+++GO:0019373///epoxygenase P450 pathway
299656	RGD1560291	1	2.84	4	4	0	0	2.39	0	2.31128	0.00898128	0.0338777			GO:0005524///ATP binding	GO:0006954///inflammatory response
108349682	LOC108349682	0	70.6	72.25	36.12	36.13	0	0	0	2.31114	3.05915e-24	1.35492e-22	03010///Ribosome	GO:0022625///cytosolic large ribosomal subunit+++GO:0005739///mitochondrion	GO:0043021///ribonucleoprotein complex binding+++GO:0003735///structural constituent of ribosome	GO:0006364///rRNA processing+++GO:0002181///cytoplasmic translation+++GO:0042273///ribosomal large subunit biogenesis
100911168	LOC100911168	0	6.31	15.23	13.4	3.04	0	0	4.09	2.2956	7.82113e-06	6.55316e-05		GO:0031463///Cul3-RING ubiquitin ligase complex+++GO:0005634///nucleus		GO:0016567///protein ubiquitination+++GO:0006511///ubiquitin-dependent protein catabolic process+++GO:2000042///negative regulation of double-strand break repair via homologous recombination+++GO:0071630///nuclear protein quality control by the ubiquitin-proteasome system
502301	Vom2r36	1	3	0	0.82	0	1	0	0	2.27173	0.0989861	0.226913		GO:0005886///plasma membrane+++GO:0016021///integral component of membrane+++GO:0005887///integral component of plasma membrane+++GO:0016020///membrane	GO:0004930///G protein-coupled receptor activity	GO:0007165///signal transduction+++GO:0007186///G protein-coupled receptor signaling pathway
100909443	LOC100909443	0	2.62	0	6.25	1.87	0	0	0	2.24859	0.0261391	0.0807885		GO:0032993///protein-DNA complex+++GO:0005654///nucleoplasm+++GO:0005667///transcription factor complex+++GO:0032991///protein-containing complex	GO:0043565///sequence-specific DNA binding+++GO:0003677///DNA binding	GO:0032330///regulation of chondrocyte differentiation+++GO:0001759///organ induction+++GO:0007338///single fertilization+++GO:0009952///anterior/posterior pattern specification+++GO:0010720///positive regulation of cell development+++GO:0032332///positive regulation of chondrocyte differentiation+++GO:0009953///dorsal/ventral pattern formation+++GO:0001501///skeletal system development+++GO:0007…
499322	Fam111a	37	32	50	542	35	39	36	31	2.23165	2.02968e-81	3.22127e-79		GO:0001650///fibrillar center+++GO:0000785///chromatin+++GO:0005737///cytoplasm+++GO:0005634///nucleus		GO:0006260///DNA replication+++GO:0045071///negative regulation of viral genome replication
25453	Gdnf	1	4	20	3	0	1	3	2	2.22509	8.62587e-05	0.000581315		GO:0005615///extracellular space+++GO:0005576///extracellular region+++GO:0043235///receptor complex	GO:0042803///protein homodimerization activity+++GO:0008083///growth factor activity+++GO:0030971///receptor tyrosine kinase binding+++GO:0030116///glial cell-derived neurotrophic factor receptor binding+++GO:0048018///receptor ligand activity	GO:0021516///dorsal spinal cord development+++GO:0071679///commissural neuron axon guidance+++GO:0008284///positive regulation of cell proliferation+++GO:0001657///ureteric bud development+++GO:0048255///mRNA stabilization+++GO:0010468///regulation of gene expression+++GO:0043524///negative regulation of neuron apoptotic process+++GO:0090190///positive regulation of branching involved in ureteric…
108350810	LOC108350810	0	0	3	1.65	0	1	0	0	2.21992	0.110096	0.245467
100912070	LOC100912070	0	5.04	13.5	1.75	0.63	1.18	2.58	0	2.21117	0.000870255	0.00458352		GO:0005615///extracellular space		GO:1903575///cornified envelope assembly
406159	Btnl7	2	1.45	1	2	0	0	1.4	0	2.20657	0.0608236	0.157732		GO:0016020///membrane+++GO:0009897///external side of plasma membrane+++GO:0016021///integral component of membrane	GO:0005102///signaling receptor binding	GO:0050776///regulation of immune response+++GO:0050852///T cell receptor signaling pathway
494206	Ly49si1	51.29	2.1	7.46	9.5	3.61	1.17	4.4	6.18	2.19807	6.54045e-10	1.0303e-08		GO:0016020///membrane+++GO:0016021///integral component of membrane	GO:0030246///carbohydrate binding	GO:0007155///cell adhesion
102553785	LOC102553785	7.67	2.84	3.03	0	0	0	1	2	2.17689	0.00706872	0.0277289
499886	LOC499886	4.64	3.71	0	3.31	1.51	0	1.08	0	2.17324	0.0125252	0.0446039	04914///Progesterone-mediated oocyte maturation+++04114///Oocyte meiosis		GO:0019901///protein kinase binding	GO:0045859///regulation of protein kinase activity
29183	Areg	4	1	2	2	1	0	1	0	2.17262	0.0282806	0.0860391	04390///Hippo signaling pathway+++04010///MAPK signaling pathway+++04151///PI3K-Akt signaling pathway+++04012///ErbB signaling pathway	GO:0005737///cytoplasm+++GO:0009986///cell surface+++GO:0005634///nucleus+++GO:0005615///extracellular space+++GO:0016020///membrane+++GO:0016021///integral component of membrane	GO:0005154///epidermal growth factor receptor binding+++GO:0005125///cytokine activity+++GO:0008083///growth factor activity	GO:0042542///response to hydrogen peroxide+++GO:0051591///response to cAMP+++GO:0014070///response to organic cyclic compound+++GO:0007186///G protein-coupled receptor signaling pathway+++GO:0042327///positive regulation of phosphorylation+++GO:0050731///positive regulation of peptidyl-tyrosine phosphorylation+++GO:0010469///regulation of signaling receptor activity+++GO:0031175///neuron projecti…
29683	Klrc1	2.47	0	2	0	0	0	1	0	2.16297	0.1232	0.267604	04612///Antigen processing and presentation	GO:0005575///cellular_component+++GO:0016021///integral component of membrane+++GO:0016020///membrane	GO:0003674///molecular_function+++GO:0030246///carbohydrate binding	GO:0008150///biological_process
100911728	LOC100911728	2.65	1.16	1.22	1.68	0	0	0	1.51	2.15446	0.0595694	0.155177	04216///Ferroptosis+++04978///Mineral absorption+++04217///Necroptosis	GO:0005737///cytoplasm+++GO:0005829///cytosol+++GO:0005654///nucleoplasm+++GO:0008043///intracellular ferritin complex+++GO:0014069///postsynaptic density+++GO:0005840///ribosome+++GO:0022627///cytosolic small ribosomal subunit+++GO:0005634///nucleus	GO:0008199///ferric iron binding+++GO:0003723///RNA binding+++GO:0003677///DNA binding+++GO:0003735///structural constituent of ribosome+++GO:0005506///iron ion binding+++GO:0008270///zinc ion binding	GO:0006880///intracellular sequestering of iron ion+++GO:0000184///nuclear-transcribed mRNA catabolic process, nonsense-mediated decay+++GO:0006614///SRP-dependent cotranslational protein targeting to membrane+++GO:0006412///translation+++GO:0006826///iron ion transport+++GO:0006364///rRNA processing+++GO:0006413///translational initiation+++GO:0000028///ribosomal small subunit assembly+++GO:0010…
360649	RGD1359290	372.23	159.41	151.03	128.78	0	1.36	0	183.14	2.13957	1.544e-94	2.74818e-92		GO:0005840///ribosome+++GO:0022625///cytosolic large ribosomal subunit+++GO:0015934///large ribosomal subunit	GO:0003735///structural constituent of ribosome	GO:0002181///cytoplasmic translation+++GO:0006412///translation
287562	Ccl12	9	6	7	4	1	2	0	3	2.11817	0.000243461	0.0014866	04668///TNF signaling pathway+++04621///NOD-like receptor signaling pathway+++04657///IL-17 signaling pathway+++04060///Cytokine-cytokine receptor interaction+++04062///Chemokine signaling pathway	GO:0005576///extracellular region+++GO:0005615///extracellular space+++GO:0005575///cellular_component+++GO:0005623///cell	GO:0004672///protein kinase activity+++GO:0003674///molecular_function+++GO:0048020///CCR chemokine receptor binding+++GO:0008009///chemokine activity+++GO:0016004///phospholipase activator activity+++GO:0005125///cytokine activity	GO:0006887///exocytosis+++GO:0002687///positive regulation of leukocyte migration+++GO:0030593///neutrophil chemotaxis+++GO:0071356///cellular response to tumor necrosis factor+++GO:0071346///cellular response to interferon-gamma+++GO:0010469///regulation of signaling receptor activity+++GO:0043547///positive regulation of GTPase activity+++GO:0048247///lymphocyte chemotaxis+++GO:0006874///cellul…
501741	RGD1565046	2.12	6.15	7.2	3.48	0	2.41	1.98	0	2.1126	0.00176522	0.0084874		GO:0016021///integral component of membrane+++GO:0005886///plasma membrane		GO:0002376///immune system process
292918	Otog	5.24	0	1	2.01	0.04	1.15	0.73	0	2.10598	0.0394727	0.112119		GO:0005576///extracellular region	GO:0046556///alpha-L-arabinofuranosidase activity+++GO:0005198///structural molecule activity	GO:0046373///L-arabinose metabolic process+++GO:0008344///adult locomotory behavior+++GO:0007605///sensory perception of sound
290209	LOC290209	2.08	3	1.47	3.79	1.18	0	0	1.24	2.09785	0.0214658	0.069338	03040///Spliceosome	GO:0005681///spliceosomal complex+++GO:0005737///cytoplasm	GO:0019888///protein phosphatase regulator activity+++GO:0050699///WW domain binding	GO:0045292///mRNA cis splicing, via spliceosome+++GO:0006364///rRNA processing
103690198	LOC103690198	3.91	2.9	2.99	6.9	1.56	1.99	0.38	0	2.08994	0.00355053	0.0155163	04742///Taste transduction	GO:0016021///integral component of membrane	GO:0004930///G protein-coupled receptor activity+++GO:0033038///bitter taste receptor activity	GO:0001580///detection of chemical stimulus involved in sensory perception of bitter taste
690784	LOC690784	1.03	1	1.03	1.16	0	1	0	0	2.07994	0.14398	0.298346
103690084	LOC103690084	1.08	2.2	7.5	7.61	0	1.09	2.17	1.1	2.07921	0.00229231	0.0106377	01100///Metabolic pathways+++04070///Phosphatidylinositol signaling system+++00562///Inositol phosphate metabolism	GO:0030424///axon+++GO:0045334///clathrin-coated endocytic vesicle+++GO:0005769///early endosome+++GO:0030425///dendrite+++GO:0055037///recycling endosome+++GO:0005737///cytoplasm+++GO:0005905///clathrin-coated pit+++GO:0043025///neuronal cell body	GO:0034596///phosphatidylinositol phosphate 4-phosphatase activity+++GO:0042803///protein homodimerization activity+++GO:0052833///inositol monophosphate 4-phosphatase activity+++GO:0008934///inositol monophosphate 1-phosphatase activity+++GO:0052832///inositol monophosphate 3-phosphatase activity+++GO:0034595///phosphatidylinositol phosphate 5-phosphatase activity	GO:0042532///negative regulation of tyrosine phosphorylation of STAT protein+++GO:0001921///positive regulation of receptor recycling+++GO:0014898///cardiac muscle hypertrophy in response to stress+++GO:2000145///regulation of cell motility+++GO:0033137///negative regulation of peptidyl-serine phosphorylation+++GO:2001135///regulation of endocytic recycling+++GO:0008344///adult locomotory behavio…
304197	RGD1564571	1	3	12	5	0	1	4	0	2.07308	0.00114373	0.00580088	04625///C-type lectin receptor signaling pathway+++04145///Phagosome	GO:0016021///integral component of membrane+++GO:0009897///external side of plasma membrane	GO:0030246///carbohydrate binding	GO:0016045///detection of bacterium+++GO:0006910///phagocytosis, recognition+++GO:0006897///endocytosis+++GO:0042535///positive regulation of tumor necrosis factor biosynthetic process+++GO:0050766///positive regulation of phagocytosis+++GO:0001879///detection of yeast
100360950	LOC100360950	0	2.14	4.61	2.15	1.24	0	0.89	0	2.06565	0.0346386	0.100917		GO:0005576///extracellular region+++GO:0005634///nucleus+++GO:0016020///membrane+++GO:0032991///protein-containing complex+++GO:0070062///extracellular exosome+++GO:0005654///nucleoplasm+++GO:0000786///nucleosome+++GO:0000228///nuclear chromosome+++GO:0000788///nuclear nucleosome	GO:0046982///protein heterodimerization activity+++GO:0031492///nucleosomal DNA binding+++GO:0045296///cadherin binding	GO:0051290///protein heterotetramerization+++GO:0006334///nucleosome assembly+++GO:0060968///regulation of gene silencing+++GO:0060964///regulation of gene silencing by miRNA+++GO:0038111///interleukin-7-mediated signaling pathway+++GO:0045652///regulation of megakaryocyte differentiation+++GO:0032200///telomere organization+++GO:0000183///chromatin silencing at rDNA+++GO:0006325///chromatin orga…
102549227	LOC102549227	0	2.4	2.13	0	0	0	0	1.09	2.05788	0.132703	0.282037				GO:0060999///positive regulation of dendritic spine development+++GO:0021895///cerebral cortex neuron differentiation
116637	Ccl4	8	3.33	4	5	0	0	1	4	2.0263	0.00161329	0.00783204	04062///Chemokine signaling pathway+++04623///Cytosolic DNA-sensing pathway+++04620///Toll-like receptor signaling pathway+++04060///Cytokine-cytokine receptor interaction+++04064///NF-kappa B signaling pathway	GO:0005576///extracellular region+++GO:0005615///extracellular space	GO:0008009///chemokine activity+++GO:0005125///cytokine activity+++GO:0048020///CCR chemokine receptor binding	GO:0010469///regulation of signaling receptor activity+++GO:0032760///positive regulation of tumor necrosis factor production+++GO:0002548///monocyte chemotaxis+++GO:0048247///lymphocyte chemotaxis+++GO:0060326///cell chemotaxis+++GO:0006955///immune response+++GO:0071346///cellular response to interferon-gamma+++GO:0070098///chemokine-mediated signaling pathway+++GO:0048245///eosinophil chemotax…
100909671	LOC100909671	0	2.52	2.39	0	0	0	0	1.21	2.02341	0.121545	0.264975		GO:0016021///integral component of membrane+++GO:0005886///plasma membrane		GO:0002376///immune system process
102550845	LOC102550845	0	0	1.45	4.23	0	0	0	1.41	2.01289	0.0969804	0.223499	04728///Dopaminergic synapse+++04261///Adrenergic signaling in cardiomyocytes+++04152///AMPK signaling pathway+++03015///mRNA surveillance pathway+++04071///Sphingolipid signaling pathway+++04151///PI3K-Akt signaling pathway	GO:0005813///centrosome+++GO:0005794///Golgi apparatus+++GO:0005819///spindle+++GO:0005634///nucleus+++GO:0005829///cytosol	GO:0046872///metal ion binding	GO:0001782///B cell homeostasis+++GO:0030865///cortical cytoskeleton organization+++GO:0043029///T cell homeostasis+++GO:0002759///regulation of antimicrobial humoral response+++GO:0045579///positive regulation of B cell differentiation+++GO:0048536///spleen development+++GO:0032147///activation of protein kinase activity+++GO:0000226///microtubule cytoskeleton organization+++GO:0051900///regulat…
302676	RGD1564836	0	2.01	1	1	0	1	0	0	2.0063	0.164066	0.327873		GO:0000785///chromatin+++GO:0005634///nucleus	GO:0003677///DNA binding+++GO:0003906///DNA-(apurinic or apyrimidinic site) endonuclease activity	GO:0006355///regulation of transcription, DNA-templated+++GO:0006284///base-excision repair
100359930	LOC100359930	0	1	0	3	0	1	0	0	2.00269	0.165088	0.329087			GO:0003676///nucleic acid binding
102551168	LOC102551168	2	0	1	1	1	0	0	0	2.00269	0.165088	0.329087		GO:0005829///cytosol+++GO:0005882///intermediate filament		GO:0031424///keratinization
102557108	LOC102557108	1	3	1	3	1	0	1	0	2.00269	0.0496279	0.134333		GO:0016021///integral component of membrane
103692315	LOC103692315	2	1	3	2	0	1	1	0	2.00269	0.0496279	0.134333		GO:0005576///extracellular region	GO:0004867///serine-type endopeptidase inhibitor activity	GO:0030212///hyaluronan metabolic process
103694885	LOC103694885	1	2	0	1	0	0	1	0	2.00269	0.165088	0.329087		GO:0005886///plasma membrane+++GO:0016021///integral component of membrane+++GO:0032420///stereocilium+++GO:0045177///apical part of cell	GO:0005509///calcium ion binding+++GO:0047485///protein N-terminus binding	GO:0007605///sensory perception of sound+++GO:0060122///inner ear receptor cell stereocilium organization+++GO:0007156///homophilic cell adhesion via plasma membrane adhesion molecules+++GO:0007626///locomotory behavior
108348236	LOC108348236	0	1	1	2	0	0	1	0	2.00269	0.165088	0.329087		GO:0005634///nucleus	GO:0003677///DNA binding
108353019	LOC108353019	1	0	3	0	0	0	0	1	2.00269	0.165088	0.329087		GO:0005886///plasma membrane		GO:0002250///adaptive immune response
287480	Olr1466	1	2	1	0	0	1	0	0	2.00269	0.165088	0.329087	04740///Olfactory transduction	GO:0005886///plasma membrane+++GO:0016021///integral component of membrane	GO:0004888///transmembrane signaling receptor activity+++GO:0004930///G protein-coupled receptor activity+++GO:0004984///olfactory receptor activity	GO:0007186///G protein-coupled receptor signaling pathway+++GO:0050907///detection of chemical stimulus involved in sensory perception
294196	Olr1742	3	0	1	0	0	0	1	0	2.00269	0.165088	0.329087	04740///Olfactory transduction	GO:0005886///plasma membrane+++GO:0016020///membrane+++GO:0016021///integral component of membrane	GO:0004930///G protein-coupled receptor activity+++GO:0004984///olfactory receptor activity	GO:0050896///response to stimulus+++GO:0007165///signal transduction+++GO:0007186///G protein-coupled receptor signaling pathway+++GO:0007608///sensory perception of smell+++GO:0050911///detection of chemical stimulus involved in sensory perception of smell
297894	Matn1	1	0	1	2	0	0	0	1	2.00269	0.165088	0.329087		GO:0031012///extracellular matrix+++GO:0062023///collagen-containing extracellular matrix+++GO:0005615///extracellular space	GO:0005201///extracellular matrix structural constituent+++GO:0005509///calcium ion binding	GO:0002062///chondrocyte differentiation+++GO:0030500///regulation of bone mineralization+++GO:0003429///growth plate cartilage chondrocyte morphogenesis
303817	RGD1560559	3	0	0	1	0	1	0	0	2.00269	0.165088	0.329087		GO:0016021///integral component of membrane
306307	Rgr	0	1	2	1	0	0	1	0	2.00269	0.165088	0.329087		GO:0005575///cellular_component+++GO:0005887///integral component of plasma membrane+++GO:0016020///membrane+++GO:0016021///integral component of membrane	GO:0008020///G protein-coupled photoreceptor activity+++GO:0003674///molecular_function+++GO:0004930///G protein-coupled receptor activity	GO:0007602///phototransduction+++GO:0071482///cellular response to light stimulus+++GO:0007186///G protein-coupled receptor signaling pathway+++GO:0007601///visual perception+++GO:0008150///biological_process+++GO:0009584///detection of visible light
309583	Olr1733	1	1	0	0	0	0.5	0	0	2.00269	0.326308	0.522054	04740///Olfactory transduction	GO:0016021///integral component of membrane+++GO:0005886///plasma membrane	GO:0004984///olfactory receptor activity+++GO:0004930///G protein-coupled receptor activity	GO:0007608///sensory perception of smell+++GO:0007186///G protein-coupled receptor signaling pathway
315451	Muc16	0	2	1	1	0	1	0	0	2.00269	0.165088	0.329087		GO:0005886///plasma membrane+++GO:0070062///extracellular exosome+++GO:0005796///Golgi lumen+++GO:0019898///extrinsic component of membrane+++GO:0016021///integral component of membrane+++GO:0031982///vesicle		GO:0007155///cell adhesion+++GO:0016266///O-glycan processing+++GO:0002223///stimulatory C-type lectin receptor signaling pathway
367032	Olr1193	0	7	1	0	0.5	1	0	0.5	2.00269	0.0496279	0.134333	04740///Olfactory transduction	GO:0016020///membrane+++GO:0016021///integral component of membrane+++GO:0005886///plasma membrane	GO:0004984///olfactory receptor activity+++GO:0004930///G protein-coupled receptor activity	GO:0007608///sensory perception of smell+++GO:0050911///detection of chemical stimulus involved in sensory perception of smell+++GO:0050896///response to stimulus+++GO:0007165///signal transduction+++GO:0007186///G protein-coupled receptor signaling pathway
405142	Olr804	1	3	0	0	0	1	0	0	2.00269	0.165088	0.329087	04740///Olfactory transduction	GO:0005886///plasma membrane+++GO:0016020///membrane+++GO:0016021///integral component of membrane	GO:0004930///G protein-coupled receptor activity+++GO:0004984///olfactory receptor activity	GO:0007165///signal transduction+++GO:0007608///sensory perception of smell+++GO:0050896///response to stimulus+++GO:0050911///detection of chemical stimulus involved in sensory perception of smell+++GO:0007186///G protein-coupled receptor signaling pathway
499660	Sprr1a	0	2	2	0	1	0	0	0	2.00269	0.165088	0.329087		GO:0001533///cornified envelope+++GO:0005737///cytoplasm+++GO:0005575///cellular_component+++GO:0071944///cell periphery	GO:0004757///sepiapterin reductase activity+++GO:0016491///oxidoreductase activity+++GO:0005198///structural molecule activity	GO:0018149///peptide cross-linking+++GO:0010033///response to organic substance+++GO:0006729///tetrahydrobiopterin biosynthetic process+++GO:0031424///keratinization+++GO:0030216///keratinocyte differentiation+++GO:0055114///oxidation-reduction process
500245	Bmp10	3	1	0	0	0	0	1	0	2.00269	0.165088	0.329087	04060///Cytokine-cytokine receptor interaction	GO:0005575///cellular_component+++GO:0030018///Z disc+++GO:0005576///extracellular region+++GO:0009986///cell surface+++GO:0005615///extracellular space+++GO:0005737///cytoplasm	GO:0008083///growth factor activity+++GO:0005125///cytokine activity+++GO:0031433///telethonin binding+++GO:0005160///transforming growth factor beta receptor binding+++GO:0033612///receptor serine/threonine kinase binding+++GO:0005179///hormone activity+++GO:0003674///molecular_function	GO:0060298///positive regulation of sarcomere organization+++GO:0007155///cell adhesion+++GO:0007507///heart development+++GO:0030509///BMP signaling pathway+++GO:0055010///ventricular cardiac muscle tissue morphogenesis+++GO:0030336///negative regulation of cell migration+++GO:0010628///positive regulation of gene expression+++GO:0045214///sarcomere organization+++GO:0010596///negative regulatio…
500359	RGD1561551	2	1	0	1	0	1	0	0	2.00269	0.165088	0.329087			GO:0008146///sulfotransferase activity+++GO:0016740///transferase activity
501177	Gpr55	2	7	1	2	1	0	1	1	2.00269	0.0162005	0.0551899		GO:0016021///integral component of membrane+++GO:0016020///membrane+++GO:0005887///integral component of plasma membrane	GO:0004930///G protein-coupled receptor activity+++GO:0004949///cannabinoid receptor activity	GO:0038171///cannabinoid signaling pathway+++GO:0035025///positive regulation of Rho protein signal transduction+++GO:0007202///activation of phospholipase C activity+++GO:0045453///bone resorption+++GO:0070374///positive regulation of ERK1 and ERK2 cascade+++GO:0007186///G protein-coupled receptor signaling pathway+++GO:0045671///negative regulation of osteoclast differentiation+++GO:0051482///p…
64573	Trpc2	2	0	1	1	0	1	0	0	2.00269	0.165088	0.329087		GO:0005634///nucleus+++GO:0034703///cation channel complex+++GO:0005887///integral component of plasma membrane+++GO:0016020///membrane+++GO:0016021///integral component of membrane	GO:0015279///store-operated calcium channel activity+++GO:0070679///inositol 1,4,5 trisphosphate binding+++GO:0003684///damaged DNA binding+++GO:0005262///calcium channel activity+++GO:0005216///ion channel activity	GO:0055085///transmembrane transport+++GO:0006828///manganese ion transport+++GO:0006816///calcium ion transport+++GO:0000012///single strand break repair+++GO:0007338///single fertilization+++GO:0070588///calcium ion transmembrane transport+++GO:0006811///ion transport+++GO:0051480///regulation of cytosolic calcium ion concentration
680315	Fsip2	0	1	2	1	1	0	0	0	2.00269	0.165088	0.329087		GO:0031514///motile cilium+++GO:0005739///mitochondrion
680523	Tmem236	2	3	4	3	1	1	0	1	2.00269	0.0162005	0.0551899		GO:0016021///integral component of membrane+++GO:0016020///membrane
682837	Muc5ac	0	2	2	0	0	0	1	0	2.00269	0.165088	0.329087	04657///IL-17 signaling pathway	GO:0005886///plasma membrane+++GO:0005737///cytoplasm+++GO:0070701///mucus layer+++GO:0005615///extracellular space+++GO:0070062///extracellular exosome+++GO:0005796///Golgi lumen	GO:0005201///extracellular matrix structural constituent	GO:0002223///stimulatory C-type lectin receptor signaling pathway+++GO:0016266///O-glycan processing+++GO:0048015///phosphatidylinositol-mediated signaling
686106	Ccdc144b	1	2	1	0	0	1	0	0	2.00269	0.165088	0.329087
103694586	LOC103694586	0	4.68	21.75	0	0	0.31	6.31	0	1.99997	0.000363713	0.00212808	04210///Apoptosis+++04217///Necroptosis+++04214///Apoptosis - fly	GO:0005758///mitochondrial intermembrane space+++GO:0005829///cytosol+++GO:0005737///cytoplasm+++GO:0048471///perinuclear region of cytoplasm+++GO:0005743///mitochondrial inner membrane+++GO:0005634///nucleus+++GO:0005739///mitochondrion	GO:0003677///DNA binding+++GO:0046983///protein dimerization activity+++GO:0071949///FAD binding+++GO:0016174///NAD(P)H oxidase activity	GO:1904045///cellular response to aldosterone+++GO:0009636///response to toxic substance+++GO:0006919///activation of cysteine-type endopeptidase activity involved in apoptotic process+++GO:0071392///cellular response to estradiol stimulus+++GO:1902510///regulation of apoptotic DNA fragmentation+++GO:0071732///cellular response to nitric oxide+++GO:1902065///response to L-glutamate+++GO:0043525//…
102553148	Cfap58	0	0	1.48	0.5	0	0.5	0	0	1.98819	0.331037	0.527207		GO:0005929///cilium
309467	Ccdc147	0	0	1.48	0.5	0	0.5	0	0	1.98819	0.331037	0.527207		GO:0005929///cilium
362935	Ly6al	2	1.03	1	0	0	1.02	0	0	1.9849	0.165978	0.330032		GO:0031225///anchored component of membrane+++GO:0005886///plasma membrane
103690008	LOC103690008	0	1.97	4.16	10.07	2.41	0	1.87	0	1.923	0.00653293	0.0260075		GO:0016605///PML body+++GO:0005634///nucleus+++GO:0005737///cytoplasm+++GO:0000784///nuclear chromosome, telomeric region+++GO:0000780///condensed nuclear chromosome, centromeric region+++GO:0031618///nuclear pericentric heterochromatin+++GO:1990707///nuclear subtelomeric heterochromatin+++GO:0000792///heterochromatin+++GO:0000228///nuclear chromosome+++GO:0005721///pericentric heterochromatin+++…	GO:0003677///DNA binding+++GO:0035064///methylated histone binding+++GO:0046872///metal ion binding+++GO:0042393///histone binding+++GO:0003682///chromatin binding+++GO:0005524///ATP binding+++GO:0015616///DNA translocase activity+++GO:0004386///helicase activity+++GO:0070087///chromo shadow domain binding	GO:0031297///replication fork processing+++GO:0045944///positive regulation of transcription by RNA polymerase II+++GO:0006338///chromatin remodeling+++GO:0010571///positive regulation of nuclear cell cycle DNA replication+++GO:1900112///regulation of histone H3-K9 trimethylation+++GO:0030900///forebrain development+++GO:0035264///multicellular organism growth+++GO:0006334///nucleosome assembly++…
100910308	LOC100910308	125.14	238.42	200.84	172.79	0	100.29	94.96	0	1.91941	5.32027e-75	7.7347e-73	01130///Biosynthesis of antibiotics+++00230///Purine metabolism+++01110///Biosynthesis of secondary metabolites+++01100///Metabolic pathways		GO:0004639///phosphoribosylaminoimidazolesuccinocarboxamide synthase activity	GO:0006164///purine nucleotide biosynthetic process+++GO:0006189///'de novo' IMP biosynthetic process
494207	Ly49si2	5.52	5.77	16.49	6.61	0	4.77	1.72	2.66	1.91284	7.85822e-05	0.000535456		GO:0009897///external side of plasma membrane+++GO:0016021///integral component of membrane+++GO:0005886///plasma membrane	GO:0030246///carbohydrate binding	GO:0007155///cell adhesion
100910243	LOC100910243	0.15	0	1.64	1.02	0.75	0	0	0	1.9083	0.259769	0.449224	04072///Phospholipase D signaling pathway+++04015///Rap1 signaling pathway+++04014///Ras signaling pathway
54242	Cpa3	10	57	199	32	21	14	34	11	1.89993	5.77126e-31	3.38196e-29	04972///Pancreatic secretion+++04614///Renin-angiotensin system+++04974///Protein digestion and absorption	GO:0005615///extracellular space+++GO:0031410///cytoplasmic vesicle+++GO:0030133///transport vesicle	GO:0016787///hydrolase activity+++GO:0008233///peptidase activity+++GO:0004180///carboxypeptidase activity+++GO:0008270///zinc ion binding+++GO:0008237///metallopeptidase activity+++GO:0046872///metal ion binding+++GO:0004181///metallocarboxypeptidase activity	GO:0006508///proteolysis+++GO:0002002///regulation of angiotensin levels in blood
108351097	LOC108351097	173.69	133.17	3013.93	146.25	254.78	441.13	151.95	92.38	1.8853	0	0		GO:0005829///cytosol+++GO:0005737///cytoplasm+++GO:0005815///microtubule organizing center+++GO:0048471///perinuclear region of cytoplasm	GO:0036312///phosphatidylinositol 3-kinase regulatory subunit binding+++GO:0005524///ATP binding	GO:0032715///negative regulation of interleukin-6 production+++GO:1900016///negative regulation of cytokine production involved in inflammatory response+++GO:0032088///negative regulation of NF-kappaB transcription factor activity+++GO:0045824///negative regulation of innate immune response+++GO:0042110///T cell activation+++GO:0031396///regulation of protein ubiquitination+++GO:0032688///negativ…
303886	Muc20	6	2	3	0	2	1	0	0	1.87716	0.0274426	0.0841278		GO:0005575///cellular_component	GO:0003674///molecular_function	GO:0000187///activation of MAPK activity+++GO:0048012///hepatocyte growth factor receptor signaling pathway+++GO:0008150///biological_process
309225	Olr337	1	4	4	2	0	0	2	1	1.87716	0.0274426	0.0841278	04740///Olfactory transduction	GO:0016021///integral component of membrane+++GO:0016020///membrane+++GO:0005886///plasma membrane	GO:0004930///G protein-coupled receptor activity+++GO:0005549///odorant binding+++GO:0004984///olfactory receptor activity	GO:0050896///response to stimulus+++GO:0007186///G protein-coupled receptor signaling pathway+++GO:0007165///signal transduction+++GO:0007608///sensory perception of smell+++GO:0050911///detection of chemical stimulus involved in sensory perception of smell
103690049	LOC103690049	2.29	0	5.7	1	0.93	0	1.53	0	1.87236	0.046581	0.127829		GO:0005576///extracellular region+++GO:0005783///endoplasmic reticulum+++GO:0005634///nucleus	GO:0003677///DNA binding+++GO:0004520///endodeoxyribonuclease activity	GO:0070948///regulation of neutrophil mediated cytotoxicity+++GO:0002283///neutrophil activation involved in immune response+++GO:0006309///apoptotic DNA fragmentation+++GO:0002673///regulation of acute inflammatory response+++GO:0010623///programmed cell death involved in cell development+++GO:0000737///DNA catabolic process, endonucleolytic
681126	Krt83	3	0	3.23	1	1	0	1	0	1.85669	0.0759698	0.186979		GO:0005882///intermediate filament+++GO:0045095///keratin filament+++GO:0005575///cellular_component	GO:0005198///structural molecule activity+++GO:0003674///molecular_function	GO:0008150///biological_process
100910750	LOC100910750	8.2	2.96	8.35	11.57	0	0	3.05	5.73	1.82639	0.000274454	0.00165516		GO:0005730///nucleolus+++GO:0005681///spliceosomal complex+++GO:0016607///nuclear speck+++GO:0005689///U12-type spliceosomal complex+++GO:0005737///cytoplasm+++GO:0071008///U2-type post-mRNA release spliceosomal complex	GO:0003723///RNA binding+++GO:0005524///ATP binding+++GO:0003725///double-stranded RNA binding+++GO:0004004///ATP-dependent RNA helicase activity	GO:0009636///response to toxic substance+++GO:0043279///response to alkaloid+++GO:0000398///mRNA splicing, via spliceosome
100909897	LOC100909897	0	4	3.01	0	2	0	0	0	1.81211	0.0856823	0.20472		GO:0070449///elongin complex		GO:0006368///transcription elongation from RNA polymerase II promoter
25305	Cort	1	1	3	2	0	1	1	0	1.81005	0.0861509	0.205491		GO:0005576///extracellular region+++GO:0043240///Fanconi anaemia nuclear complex	GO:0001664///G protein-coupled receptor binding+++GO:0005179///hormone activity+++GO:0005184///neuropeptide hormone activity	GO:0010469///regulation of signaling receptor activity+++GO:0007193///adenylate cyclase-inhibiting G protein-coupled receptor signaling pathway+++GO:0045187///regulation of circadian sleep/wake cycle, sleep+++GO:0007218///neuropeptide signaling pathway
296846	Hepacam2	4	2	0	1	0	1	0	1	1.81005	0.0861509	0.205491		GO:0005813///centrosome+++GO:0016020///membrane+++GO:0005794///Golgi apparatus+++GO:0005819///spindle+++GO:0016021///integral component of membrane+++GO:0030496///midbody		GO:0007098///centrosome cycle
100910095	LOC100910095	0	0	1.01	1.01	0	0	0	0.58	1.80292	0.35791	0.554901		GO:0005576///extracellular region+++GO:0032991///protein-containing complex+++GO:0070062///extracellular exosome+++GO:0000788///nuclear nucleosome+++GO:0005634///nucleus+++GO:0000786///nucleosome+++GO:0000784///nuclear chromosome, telomeric region+++GO:0000228///nuclear chromosome+++GO:0005654///nucleoplasm	GO:0000980///RNA polymerase II distal enhancer sequence-specific DNA binding+++GO:0046982///protein heterodimerization activity+++GO:0000979///RNA polymerase II core promoter sequence-specific DNA binding+++GO:0031492///nucleosomal DNA binding	GO:0060964///regulation of gene silencing by miRNA+++GO:0006334///nucleosome assembly+++GO:0006336///DNA replication-independent nucleosome assembly+++GO:0032200///telomere organization+++GO:0045652///regulation of megakaryocyte differentiation+++GO:0000183///chromatin silencing at rDNA+++GO:0007596///blood coagulation+++GO:0044267///cellular protein metabolic process+++GO:0030307///positive regu…
690680	Vom2r15	0	0	2.78	1	0	0	0	1.09	1.79675	0.2096	0.387971		GO:0016020///membrane+++GO:0005886///plasma membrane+++GO:0005887///integral component of plasma membrane+++GO:0016021///integral component of membrane	GO:0004930///G protein-coupled receptor activity	GO:0007165///signal transduction+++GO:0007186///G protein-coupled receptor signaling pathway
689790	Clec2dl1	3	8.83	32.18	4.94	0	5.12	3.3	5.71	1.79524	6.40999e-06	5.46211e-05		GO:0005886///plasma membrane+++GO:0016020///membrane+++GO:0016021///integral component of membrane	GO:0030246///carbohydrate binding
100912499	Lilra3	9.89	10.92	0	0	0	6.02	0	0	1.79213	0.00329641	0.0145493	04380///Osteoclast differentiation	GO:0016021///integral component of membrane+++GO:0005886///plasma membrane	GO:0001540///amyloid-beta binding+++GO:0042803///protein homodimerization activity+++GO:0044877///protein-containing complex binding	GO:0019221///cytokine-mediated signaling pathway+++GO:0019724///B cell mediated immunity+++GO:0043011///myeloid dendritic cell differentiation+++GO:1900271///regulation of long-term synaptic potentiation+++GO:1900454///positive regulation of long-term synaptic depression+++GO:0051248///negative regulation of protein metabolic process+++GO:0035307///positive regulation of protein dephosphorylation…
684526	LOC684526	0	0	0	1.41	0.41	0	0	0	1.78469	0.44562	0.6383		GO:0005634///nucleus		GO:0007275///multicellular organism development+++GO:0006355///regulation of transcription, DNA-templated+++GO:0006351///transcription, DNA-templated
100912642	LOC100912642	1	1	1	8.14	0	0	0	3.28	1.76667	0.0332618	0.0978637	01100///Metabolic pathways+++04750///Inflammatory mediator regulation of TRP channels+++00591///Linoleic acid metabolism+++04726///Serotonergic synapse+++04913///Ovarian steroidogenesis+++04212///Longevity regulating pathway - worm+++00590///Arachidonic acid metabolism	GO:0031090///organelle membrane+++GO:0005789///endoplasmic reticulum membrane	GO:0020037///heme binding+++GO:0005506///iron ion binding+++GO:0070330///aromatase activity
303782	Vpreb1	4.52	4.52	12	4	4.88	0	0	2.53	1.75938	0.00145952	0.00719186		GO:0005615///extracellular space		GO:0006955///immune response+++GO:0002377///immunoglobulin production
192267	Obp1f	3.07	2	2	2.95	2	0	0	1	1.74254	0.0455197	0.125677		GO:0005576///extracellular region	GO:0005549///odorant binding+++GO:0036094///small molecule binding	GO:0007608///sensory perception of smell+++GO:0050896///response to stimulus
100912379	LOC100912379	0	4.81	0	6.69	0	3.45	0	0	1.73966	0.0323587	0.0958282	04062///Chemokine signaling pathway+++04145///Phagosome+++04666///Fc gamma R-mediated phagocytosis+++04670///Leukocyte transendothelial migration+++04380///Osteoclast differentiation	GO:0043025///neuronal cell body+++GO:0005794///Golgi apparatus+++GO:0005791///rough endoplasmic reticulum+++GO:0016020///membrane+++GO:0002102///podosome+++GO:0005829///cytosol+++GO:0043020///NADPH oxidase complex+++GO:0019898///extrinsic component of membrane+++GO:0030425///dendrite+++GO:0005886///plasma membrane	GO:0043325///phosphatidylinositol-3,4-bisphosphate binding+++GO:0035091///phosphatidylinositol binding+++GO:0016176///superoxide-generating NADPH oxidase activator activity+++GO:0017124///SH3 domain binding+++GO:0016175///superoxide-generating NADPH oxidase activity	GO:0006915///apoptotic process+++GO:0045741///positive regulation of epidermal growth factor-activated receptor activity+++GO:0014068///positive regulation of phosphatidylinositol 3-kinase signaling+++GO:0071276///cellular response to cadmium ion+++GO:0071800///podosome assembly+++GO:0006801///superoxide metabolic process+++GO:1900745///positive regulation of p38MAPK cascade+++GO:0034614///cellul…
25680	Clps	0	5	3	2	1	0	2	0	1.73966	0.0459867	0.126691	04975///Fat digestion and absorption	GO:0005576///extracellular region	GO:0008047///enzyme activator activity	GO:0009617///response to bacterium+++GO:0016042///lipid catabolic process+++GO:0007586///digestion+++GO:0032094///response to food+++GO:0009791///post-embryonic development+++GO:0006629///lipid metabolic process+++GO:0043085///positive regulation of catalytic activity
289515	Epgn	4	1	5	0	0	1	2	0	1.73966	0.0459867	0.126691		GO:0016020///membrane+++GO:0005887///integral component of plasma membrane+++GO:0016021///integral component of membrane	GO:0005154///epidermal growth factor receptor binding+++GO:0008083///growth factor activity	GO:0045741///positive regulation of epidermal growth factor-activated receptor activity+++GO:0045840///positive regulation of mitotic nuclear division+++GO:0001525///angiogenesis+++GO:0050679///positive regulation of epithelial cell proliferation+++GO:0043406///positive regulation of MAP kinase activity+++GO:0008284///positive regulation of cell proliferation
29165	Gzmk	4	1	2	3	1	1	0	1	1.73966	0.0459867	0.126691			GO:0008233///peptidase activity+++GO:0016787///hydrolase activity+++GO:0004252///serine-type endopeptidase activity+++GO:0008236///serine-type peptidase activity	GO:0006508///proteolysis
310611	Pglyrp4	1	4	4	1	0	1	1	1	1.73966	0.0459867	0.126691		GO:0005615///extracellular space+++GO:0032991///protein-containing complex	GO:0042834///peptidoglycan binding+++GO:0008745///N-acetylmuramoyl-L-alanine amidase activity+++GO:0016019///peptidoglycan receptor activity+++GO:0008270///zinc ion binding+++GO:0046982///protein heterodimerization activity	GO:0032827///negative regulation of natural killer cell differentiation involved in immune response+++GO:0002221///pattern recognition receptor signaling pathway+++GO:0031640///killing of cells of other organism+++GO:0009253///peptidoglycan catabolic process+++GO:0050830///defense response to Gram-positive bacterium+++GO:0016045///detection of bacterium+++GO:0032689///negative regulation of inter…
502585	Cd160	3	2	3	2	0	1	1	1	1.73966	0.0459867	0.126691		GO:0046658///anchored component of plasma membrane	GO:0032393///MHC class I receptor activity+++GO:0005102///signaling receptor binding	GO:2000353///positive regulation of endothelial cell apoptotic process+++GO:0050829///defense response to Gram-negative bacterium+++GO:0016525///negative regulation of angiogenesis
171118	Ces2c	0	6	3.99	0	1	2	0	0	1.73822	0.046222	0.127211	00983///Drug metabolism - other enzymes	GO:0005615///extracellular space+++GO:0043231///intracellular membrane-bounded organelle	GO:0016787///hydrolase activity+++GO:0052689///carboxylic ester hydrolase activity+++GO:0047619///acylcarnitine hydrolase activity
288398	RGD1562451	0	0	1.98	2.59	0	1.38	0	0	1.73022	0.178987	0.34766	03013///RNA transport+++03015///mRNA surveillance pathway+++03018///RNA degradation	GO:0005829///cytosol+++GO:1990904///ribonucleoprotein complex+++GO:0010494///cytoplasmic stress granule+++GO:0005737///cytoplasm+++GO:0005634///nucleus	GO:0003729///mRNA binding+++GO:0008143///poly(A) binding+++GO:0008266///poly(U) RNA binding+++GO:0003723///RNA binding	GO:0061515///myeloid cell development+++GO:0006396///RNA processing+++GO:0006412///translation+++GO:0007596///blood coagulation+++GO:0043488///regulation of mRNA stability+++GO:0006401///RNA catabolic process
24828	Hist1h2aa	0	2.39	0.95	3.71	0	0	2.14	0	1.72271	0.0960978	0.22219	04217///Necroptosis	GO:0000786///nucleosome+++GO:0000790///nuclear chromatin	GO:0003677///DNA binding+++GO:0046982///protein heterodimerization activity	GO:0006342///chromatin silencing
108352834	LOC108352834	3	0	0	0.26	0	0	1	0	1.70757	0.260765	0.45021
100910915	LOC100910915	1.95	3.67	3.82	3.39	0	1.97	1.97	0	1.70595	0.0257809	0.0799409		GO:0005634///nucleus+++GO:0048471///perinuclear region of cytoplasm	GO:0042802///identical protein binding
306748	Cxcl14	53	183	508	33	33	126	55	26	1.69757	5.58164e-67	7.33119e-65	04062///Chemokine signaling pathway+++04060///Cytokine-cytokine receptor interaction	GO:0005576///extracellular region+++GO:0005794///Golgi apparatus	GO:0008009///chemokine activity	GO:2000503///positive regulation of natural killer cell chemotaxis+++GO:0045662///negative regulation of myoblast differentiation+++GO:0006955///immune response+++GO:0060326///cell chemotaxis+++GO:0048839///inner ear development
497084	Spetex-2B	0.52	0.11	1.6	0.6	0	0	0.89	0	1.67162	0.302003	0.499015
365807	Vom2r47	0	1.05	2.07	0.98	0	0	1.3	0	1.65981	0.216426	0.397668		GO:0016021///integral component of membrane+++GO:0016020///membrane+++GO:0005886///plasma membrane+++GO:0005887///integral component of plasma membrane	GO:0004930///G protein-coupled receptor activity	GO:0007186///G protein-coupled receptor signaling pathway+++GO:0007165///signal transduction
108348150	LOC108348150	14.79	53.94	14.42	13.02	15.91	0	14.72	0	1.65333	2.37376e-09	3.49099e-08		GO:0016021///integral component of membrane
100910579	LOC100910579	0	1.03	1.73	2.8	0	0	0	1.78	1.6459	0.152479	0.310153		GO:0014069///postsynaptic density+++GO:0005829///cytosol+++GO:0005925///focal adhesion+++GO:0070062///extracellular exosome+++GO:0016020///membrane+++GO:0022625///cytosolic large ribosomal subunit+++GO:0042788///polysomal ribosome+++GO:0005634///nucleus	GO:0003723///RNA binding+++GO:0003735///structural constituent of ribosome	GO:0006614///SRP-dependent cotranslational protein targeting to membrane+++GO:0006413///translational initiation+++GO:0006412///translation+++GO:0002181///cytoplasmic translation+++GO:0000184///nuclear-transcribed mRNA catabolic process, nonsense-mediated decay+++GO:0000470///maturation of LSU-rRNA+++GO:0045471///response to ethanol
102556085	LOC102556085	5.26	3.65	5.1	4.79	0	0	4.99	1.06	1.63842	0.00872898	0.0330504		GO:0005887///integral component of plasma membrane	GO:0015211///purine nucleoside transmembrane transporter activity+++GO:0005337///nucleoside transmembrane transporter activity+++GO:0005415///nucleoside:sodium symporter activity	GO:0015860///purine nucleoside transmembrane transport+++GO:0001895///retina homeostasis+++GO:0034394///protein localization to cell surface
100911090	LOC100911090	133.82	67	70.63	0	0.01	0	88.17	0	1.62486	3.92684e-23	1.65092e-21		GO:0005730///nucleolus+++GO:0005634///nucleus	GO:0003700///DNA-binding transcription factor activity+++GO:0003677///DNA binding+++GO:0000981///DNA-binding transcription factor activity, RNA polymerase II-specific+++GO:0046872///metal ion binding	GO:0006351///transcription, DNA-templated+++GO:1901989///positive regulation of cell cycle phase transition+++GO:0043066///negative regulation of apoptotic process+++GO:0045648///positive regulation of erythrocyte differentiation+++GO:0051301///cell division+++GO:0006355///regulation of transcription, DNA-templated+++GO:0045654///positive regulation of megakaryocyte differentiation+++GO:0033674//…
498067	RGD1565472	10.92	7.01	5.61	8.91	3.75	3.21	3.6	0	1.6223	0.000623753	0.00341754		GO:0016020///membrane+++GO:0016021///integral component of membrane	GO:0017137///Rab GTPase binding	GO:0032007///negative regulation of TOR signaling+++GO:0008285///negative regulation of cell proliferation
292615	Vom2r35	0	0	0.31	2.76	1	0	0	0	1.62093	0.292973	0.488673		GO:0016020///membrane+++GO:0016021///integral component of membrane+++GO:0005887///integral component of plasma membrane+++GO:0005886///plasma membrane	GO:0004930///G protein-coupled receptor activity	GO:0007186///G protein-coupled receptor signaling pathway+++GO:0007165///signal transduction
108348438	LOC108348438	10.99	18.42	15.94	13.8	0	1	0	18.48	1.60508	4.57362e-06	4.01404e-05			GO:0004190///aspartic-type endopeptidase activity+++GO:0004170///dUTP diphosphatase activity
405976	Olr1254	0	1	0	0	0	0.33	0	0	1.60216	0.551727	0.731985	04740///Olfactory transduction	GO:0016021///integral component of membrane+++GO:0005886///plasma membrane	GO:0005549///odorant binding+++GO:0004984///olfactory receptor activity+++GO:0004930///G protein-coupled receptor activity	GO:0007186///G protein-coupled receptor signaling pathway
751812	Rasl2-9	1.09	0	0	2.17	0	1.08	0	0	1.59653	0.283771	0.477675	03013///RNA transport+++03008///Ribosome biogenesis in eukaryotes	GO:0005634///nucleus+++GO:0005737///cytoplasm	GO:0003924///GTPase activity+++GO:0000166///nucleotide binding+++GO:0005525///GTP binding	GO:0006606///protein import into nucleus+++GO:0006913///nucleocytoplasmic transport+++GO:0015031///protein transport
103690165	LOC103690165	0	1.3	1.29	1.29	0	0	1.29	0	1.59138	0.243353	0.431492		GO:0005730///nucleolus+++GO:0030896///checkpoint clamp complex		GO:0000077///DNA damage checkpoint+++GO:0000075///cell cycle checkpoint
498169	RGD1561730	7.68	17.63	32.46	5.33	7.81	0	5.03	8.16	1.58994	2.58008e-06	2.38416e-05		GO:0016020///membrane+++GO:0016021///integral component of membrane	GO:0042288///MHC class I protein binding	GO:0045671///negative regulation of osteoclast differentiation+++GO:0007169///transmembrane receptor protein tyrosine kinase signaling pathway+++GO:0001773///myeloid dendritic cell activation
103689998	Nupr1l1	10.05	0	0	20.11	0	10.05	0	0	1.58813	0.00116277	0.00588648		GO:0005634///nucleus	GO:0003682///chromatin binding	GO:0006357///regulation of transcription by RNA polymerase II
100360197	Rad51ap2	0	1	2	0	0	0	0	1	1.58766	0.305783	0.502232		GO:0032991///protein-containing complex
100365184	Prdm14	1	2	0	0	1	0	0	0	1.58766	0.305783	0.502232		GO:0005634///nucleus+++GO:0005654///nucleoplasm	GO:0043565///sequence-specific DNA binding+++GO:0003723///RNA binding+++GO:0031490///chromatin DNA binding+++GO:0003676///nucleic acid binding+++GO:0000977///RNA polymerase II regulatory region sequence-specific DNA binding	GO:0009566///fertilization+++GO:0019827///stem cell population maintenance+++GO:0060817///inactivation of paternal X chromosome+++GO:0030718///germ-line stem cell population maintenance+++GO:1902093///positive regulation of flagellated sperm motility+++GO:0040029///regulation of gene expression, epigenetic+++GO:0001708///cell fate specification+++GO:0034972///histone H3-R26 methylation+++GO:00009…
100912573	Ms4a6e	0	20.65	41.3	0	0	0	0	20.65	1.58766	3.25879e-06	2.94699e-05		GO:0016020///membrane+++GO:0016021///integral component of membrane
102552016	LOC102552016	2	0	2	2	1	0	0	1	1.58766	0.14753	0.302998
102553208	LOC102553208	2	0	1	0	1	0	0	0	1.58766	0.305783	0.502232		GO:0005622///intracellular	GO:0005085///guanyl-nucleotide exchange factor activity	GO:0007264///small GTPase mediated signal transduction
103690566	LOC103690566	1	0	2	0	0	0	0	1	1.58766	0.305783	0.502232
108349482	LOC108349482	3	1	5	3	0	2	0	2	1.58766	0.0405381	0.114369
108349722	LOC108349722	0	3	0	0	0	1	0	0	1.58766	0.305783	0.502232	04640///Hematopoietic cell lineage	GO:0016021///integral component of membrane+++GO:0009986///cell surface	GO:0038024///cargo receptor activity	GO:0006898///receptor-mediated endocytosis
116562	Il2	2	1	0	0	1	0	0	0	1.58766	0.305783	0.502232	04659///Th17 cell differentiation+++04060///Cytokine-cytokine receptor interaction+++04658///Th1 and Th2 cell differentiation+++04672///Intestinal immune network for IgA production+++04151///PI3K-Akt signaling pathway+++04625///C-type lectin receptor signaling pathway+++04660///T cell receptor signaling pathway+++04630///Jak-STAT signaling pathway	GO:0005623///cell+++GO:0005576///extracellular region+++GO:0005615///extracellular space	GO:0005134///interleukin-2 receptor binding+++GO:0043208///glycosphingolipid binding+++GO:0005125///cytokine activity+++GO:0030246///carbohydrate binding+++GO:0031851///kappa-type opioid receptor binding+++GO:0008083///growth factor activity	GO:0007205///protein kinase C-activating G protein-coupled receptor signaling pathway+++GO:0001933///negative regulation of protein phosphorylation+++GO:0002376///immune system process+++GO:0002903///negative regulation of B cell apoptotic process+++GO:0006955///immune response+++GO:0010469///regulation of signaling receptor activity+++GO:0045822///negative regulation of heart contraction+++GO:00…
246073	Foxi2	1	0	1	1	0	0	0	1	1.58766	0.305783	0.502232		GO:0005634///nucleus+++GO:0005575///cellular_component	GO:0000981///DNA-binding transcription factor activity, RNA polymerase II-specific+++GO:0043565///sequence-specific DNA binding+++GO:0003677///DNA binding+++GO:0003674///molecular_function+++GO:0000977///RNA polymerase II regulatory region sequence-specific DNA binding+++GO:0044212///transcription regulatory region DNA binding+++GO:0001228///DNA-binding transcription activator activity, RNA polym…	GO:0048557///embryonic digestive tract morphogenesis+++GO:0030198///extracellular matrix organization+++GO:0030324///lung development+++GO:0048617///embryonic foregut morphogenesis+++GO:0001763///morphogenesis of a branching structure+++GO:0031016///pancreas development+++GO:0045944///positive regulation of transcription by RNA polymerase II+++GO:0043305///negative regulation of mast cell degranu…
24835	Tnf	0	3	5	10	0	0	2	4	1.58766	0.0121228	0.0434389	04064///NF-kappa B signaling pathway+++04920///Adipocytokine signaling pathway+++04668///TNF signaling pathway+++04657///IL-17 signaling pathway+++04664///Fc epsilon RI signaling pathway+++04621///NOD-like receptor signaling pathway+++04380///Osteoclast differentiation+++04150///mTOR signaling pathway+++04217///Necroptosis+++04660///T cell receptor signaling pathway+++04350///TGF-beta signaling p…	GO:0009897///external side of plasma membrane+++GO:0005886///plasma membrane+++GO:0005576///extracellular region+++GO:0016020///membrane+++GO:0005615///extracellular space+++GO:0016021///integral component of membrane	GO:0000977///RNA polymerase II regulatory region sequence-specific DNA binding+++GO:0005125///cytokine activity+++GO:0005164///tumor necrosis factor receptor binding	GO:0050729///positive regulation of inflammatory response+++GO:0009314///response to radiation+++GO:0007165///signal transduction+++GO:0010628///positive regulation of gene expression+++GO:0045760///positive regulation of action potential+++GO:0031642///negative regulation of myelination+++GO:0006955///immune response+++GO:1903078///positive regulation of protein localization to plasma membrane++…
25569	Trh	0	2	1	0	1	0	0	0	1.58766	0.305783	0.502232		GO:0005737///cytoplasm+++GO:0005886///plasma membrane+++GO:0005576///extracellular region+++GO:0005634///nucleus+++GO:0030141///secretory granule	GO:0008437///thyrotropin-releasing hormone activity+++GO:0005179///hormone activity	GO:0014050///negative regulation of glutamate secretion+++GO:0032024///positive regulation of insulin secretion+++GO:0009755///hormone-mediated signaling pathway+++GO:0001666///response to hypoxia+++GO:0010469///regulation of signaling receptor activity+++GO:0014054///positive regulation of gamma-aminobutyric acid secretion+++GO:2000252///negative regulation of feeding behavior+++GO:0045471///res…
25593	Hcrtr1	3	1	3	5	0	0	4	0	1.58766	0.0405381	0.114369	04080///Neuroactive ligand-receptor interaction	GO:0016021///integral component of membrane+++GO:0005886///plasma membrane+++GO:0005887///integral component of plasma membrane+++GO:0016020///membrane	GO:0016499///orexin receptor activity+++GO:0017046///peptide hormone binding+++GO:0004930///G protein-coupled receptor activity	GO:0007218///neuropeptide signaling pathway+++GO:0007631///feeding behavior+++GO:0007186///G protein-coupled receptor signaling pathway+++GO:0007165///signal transduction+++GO:0070374///positive regulation of ERK1 and ERK2 cascade+++GO:0051480///regulation of cytosolic calcium ion concentration
266708	Gzma	1	0	2	0	0	1	0	0	1.58766	0.305783	0.502232	04080///Neuroactive ligand-receptor interaction	GO:0005576///extracellular region+++GO:0005634///nucleus	GO:0008233///peptidase activity+++GO:0016787///hydrolase activity+++GO:0004252///serine-type endopeptidase activity+++GO:0042803///protein homodimerization activity+++GO:0008236///serine-type peptidase activity	GO:0032078///negative regulation of endodeoxyribonuclease activity+++GO:0051603///proteolysis involved in cellular protein catabolic process+++GO:0051354///negative regulation of oxidoreductase activity+++GO:0006508///proteolysis+++GO:0043065///positive regulation of apoptotic process+++GO:0043392///negative regulation of DNA binding
288602	Ervfrd-1	0	4	2	3	2	1	0	0	1.58766	0.0760941	0.1872		GO:0016020///membrane+++GO:0016021///integral component of membrane		GO:0000768///syncytium formation by plasma membrane fusion+++GO:0060711///labyrinthine layer development
290227	Rec8	1	0	2	3	0	1	0	1	1.58766	0.14753	0.302998	04114///Oocyte meiosis	GO:0001673///male germ cell nucleus+++GO:0000793///condensed chromosome+++GO:0030893///meiotic cohesin complex+++GO:0034991///nuclear meiotic cohesin complex+++GO:0000228///nuclear chromosome+++GO:0000775///chromosome, centromeric region+++GO:0005694///chromosome+++GO:0000795///synaptonemal complex+++GO:0000794///condensed nuclear chromosome+++GO:0000778///condensed nuclear chromosome kinetochore…	GO:0005515///protein binding+++GO:0003682///chromatin binding	GO:0007286///spermatid development+++GO:0007129///synapsis+++GO:0007130///synaptonemal complex assembly+++GO:0007059///chromosome segregation+++GO:0000724///double-strand break repair via homologous recombination+++GO:0051321///meiotic cell cycle+++GO:0007062///sister chromatid cohesion+++GO:0006302///double-strand break repair+++GO:0009566///fertilization+++GO:0072520///seminiferous tubule devel…
290338	Adamdec1	2	1	0	0	0	0	1	0	1.58766	0.305783	0.502232		GO:0005576///extracellular region	GO:0008237///metallopeptidase activity+++GO:0004222///metalloendopeptidase activity	GO:0006508///proteolysis
292848	Klk13	0	2	0	1	0	0	0	1	1.58766	0.305783	0.502232		GO:0030141///secretory granule+++GO:0005615///extracellular space+++GO:0005737///cytoplasm	GO:0008236///serine-type peptidase activity+++GO:0008233///peptidase activity+++GO:0004175///endopeptidase activity+++GO:0004252///serine-type endopeptidase activity+++GO:0016787///hydrolase activity	GO:0016485///protein processing+++GO:0006508///proteolysis
293594	Olr292	1	2	0	0	0	1	0	0	1.58766	0.305783	0.502232	04740///Olfactory transduction	GO:0016021///integral component of membrane+++GO:0016020///membrane+++GO:0009897///external side of plasma membrane+++GO:0005886///plasma membrane	GO:0004930///G protein-coupled receptor activity+++GO:0004984///olfactory receptor activity+++GO:0005044///scavenger receptor activity	GO:0006898///receptor-mediated endocytosis+++GO:0007608///sensory perception of smell+++GO:0007186///G protein-coupled receptor signaling pathway+++GO:0050911///detection of chemical stimulus involved in sensory perception of smell+++GO:0050896///response to stimulus+++GO:0032620///interleukin-17 production+++GO:0002365///gamma-delta T cell lineage commitment+++GO:0007165///signal transduction
294793	Ugt3a2	2	1	0	3	1	1	0	0	1.58766	0.14753	0.302998		GO:0043231///intracellular membrane-bounded organelle+++GO:0016020///membrane+++GO:0016021///integral component of membrane	GO:0008194///UDP-glycosyltransferase activity+++GO:0016740///transferase activity+++GO:0016758///transferase activity, transferring hexosyl groups	GO:0071412///cellular response to genistein
301088	Ccr1l1	0	2	1	0	0	0	1	0	1.58766	0.305783	0.502232	04062///Chemokine signaling pathway+++04060///Cytokine-cytokine receptor interaction	GO:0009897///external side of plasma membrane+++GO:0016021///integral component of membrane+++GO:0016020///membrane+++GO:0005737///cytoplasm	GO:0071791///chemokine (C-C motif) ligand 5 binding+++GO:0035717///chemokine (C-C motif) ligand 7 binding+++GO:0016493///C-C chemokine receptor activity+++GO:0019956///chemokine binding+++GO:0004950///chemokine receptor activity+++GO:0019957///C-C chemokine binding+++GO:0004930///G protein-coupled receptor activity	GO:0070098///chemokine-mediated signaling pathway+++GO:0019722///calcium-mediated signaling+++GO:0007204///positive regulation of cytosolic calcium ion concentration+++GO:0090026///positive regulation of monocyte chemotaxis+++GO:0006955///immune response+++GO:0006954///inflammatory response+++GO:0060326///cell chemotaxis+++GO:0007165///signal transduction+++GO:0006935///chemotaxis+++GO:0007186///…
304784	Slc26a9	2	0	1	0	1	0	0	0	1.58766	0.305783	0.502232	04978///Mineral absorption	GO:0016324///apical plasma membrane+++GO:0009986///cell surface+++GO:0016021///integral component of membrane+++GO:0016020///membrane	GO:0015108///chloride transmembrane transporter activity+++GO:0015106///bicarbonate transmembrane transporter activity+++GO:0051117///ATPase binding+++GO:0019531///oxalate transmembrane transporter activity+++GO:0005254///chloride channel activity+++GO:0015116///sulfate transmembrane transporter activity+++GO:0015301///anion:anion antiporter activity+++GO:0008271///secondary active sulfate transm…	GO:0042391///regulation of membrane potential+++GO:0098656///anion transmembrane transport+++GO:0006821///chloride transport+++GO:0010628///positive regulation of gene expression+++GO:1902358///sulfate transmembrane transport+++GO:0006820///anion transport+++GO:0006811///ion transport+++GO:0019532///oxalate transport+++GO:1902476///chloride transmembrane transport+++GO:0008272///sulfate transport…
310303	Kcnmb3	2	1	0	0	1	0	0	0	1.58766	0.305783	0.502232	04911///Insulin secretion+++04022///cGMP-PKG signaling pathway+++04270///Vascular smooth muscle contraction	GO:0016021///integral component of membrane+++GO:0005887///integral component of plasma membrane+++GO:0016020///membrane+++GO:0008076///voltage-gated potassium channel complex	GO:0015459///potassium channel regulator activity+++GO:0015269///calcium-activated potassium channel activity	GO:0019228///neuronal action potential+++GO:0001508///action potential+++GO:0071805///potassium ion transmembrane transport+++GO:0006811///ion transport+++GO:0006813///potassium ion transport+++GO:0005513///detection of calcium ion
311558	Bpifb6	2	2	2	0	0	2	0	0	1.58766	0.14753	0.302998		GO:0005576///extracellular region	GO:0008289///lipid binding
315601	Foxr1	2	3	1	0	0	0	1	1	1.58766	0.14753	0.302998		GO:0005634///nucleus	GO:0003700///DNA-binding transcription factor activity+++GO:0003677///DNA binding+++GO:0043565///sequence-specific DNA binding	GO:0006355///regulation of transcription, DNA-templated
360268	Sult1e1	0	3	0	0	1	0	0	0	1.58766	0.305783	0.502232	00140///Steroid hormone biosynthesis	GO:0005575///cellular_component+++GO:0005737///cytoplasm	GO:0050294///steroid sulfotransferase activity+++GO:0016740///transferase activity+++GO:0005496///steroid binding+++GO:0008289///lipid binding+++GO:0008146///sulfotransferase activity+++GO:0004304///estrone sulfotransferase activity	GO:0008210///estrogen metabolic process
360719	Hgd	4	0	3	2	1	1	0	1	1.58766	0.0760941	0.1872	00643///Styrene degradation+++00350///Tyrosine metabolism+++01100///Metabolic pathways+++01120///Microbial metabolism in diverse environments	GO:0005575///cellular_component	GO:0003674///molecular_function+++GO:0004411///homogentisate 1,2-dioxygenase activity+++GO:0051213///dioxygenase activity+++GO:0042802///identical protein binding	GO:0006520///cellular amino acid metabolic process+++GO:0006559///L-phenylalanine catabolic process+++GO:0055114///oxidation-reduction process+++GO:0006570///tyrosine metabolic process+++GO:0008150///biological_process
362576	RGD1305347	0	2	1	0	1	0	0	0	1.58766	0.305783	0.502232		GO:0055037///recycling endosome+++GO:0016021///integral component of membrane+++GO:0005886///plasma membrane+++GO:0005769///early endosome
362623	Catsper4	2	1	1	2	0	2	0	0	1.58766	0.14753	0.302998		GO:0001669///acrosomal vesicle+++GO:0097228///sperm principal piece+++GO:0036128///CatSper complex+++GO:0016021///integral component of membrane+++GO:0016020///membrane	GO:0005245///voltage-gated calcium channel activity+++GO:0005227///calcium activated cation channel activity+++GO:0005216///ion channel activity	GO:0006811///ion transport+++GO:0055085///transmembrane transport+++GO:0030317///flagellated sperm motility+++GO:0034220///ion transmembrane transport+++GO:0006814///sodium ion transport+++GO:0070588///calcium ion transmembrane transport+++GO:0048240///sperm capacitation
365384	Olr286	0	2	1	0	0	1	0	0	1.58766	0.305783	0.502232	04740///Olfactory transduction	GO:0016021///integral component of membrane+++GO:0005886///plasma membrane+++GO:0016020///membrane	GO:0004930///G protein-coupled receptor activity+++GO:0004984///olfactory receptor activity	GO:0007186///G protein-coupled receptor signaling pathway+++GO:0007608///sensory perception of smell+++GO:0050896///response to stimulus+++GO:0007165///signal transduction+++GO:0050911///detection of chemical stimulus involved in sensory perception of smell
502961	RGD1559679	0	0	1	2	0	1	0	0	1.58766	0.305783	0.502232	04650///Natural killer cell mediated cytotoxicity+++04630///Jak-STAT signaling pathway+++04217///Necroptosis+++04622///RIG-I-like receptor signaling pathway+++04623///Cytosolic DNA-sensing pathway+++04151///PI3K-Akt signaling pathway+++04621///NOD-like receptor signaling pathway+++04060///Cytokine-cytokine receptor interaction+++04620///Toll-like receptor signaling pathway	GO:0005615///extracellular space	GO:0005132///type I interferon receptor binding+++GO:0005125///cytokine activity	GO:0002323///natural killer cell activation involved in immune response+++GO:0002286///T cell activation involved in immune response+++GO:0043330///response to exogenous dsRNA+++GO:0051607///defense response to virus+++GO:0006959///humoral immune response+++GO:0002250///adaptive immune response+++GO:0030183///B cell differentiation+++GO:0042100///B cell proliferation+++GO:0019221///cytokine-media…
54282	Padi1	0	3	0	0	0	0	0	1	1.58766	0.305783	0.502232		GO:0005829///cytosol+++GO:0005737///cytoplasm+++GO:0005654///nucleoplasm+++GO:0005634///nucleus	GO:0046872///metal ion binding+++GO:0004668///protein-arginine deiminase activity+++GO:0005509///calcium ion binding+++GO:0016787///hydrolase activity	GO:0018101///protein citrullination+++GO:0036414///histone citrullination
683282	LOC683282	2	0	0	1	1	0	0	0	1.58766	0.305783	0.502232		GO:0005634///nucleus	GO:0003682///chromatin binding	GO:0006351///transcription, DNA-templated+++GO:0019827///stem cell population maintenance+++GO:2000648///positive regulation of stem cell proliferation+++GO:0060484///lung-associated mesenchyme development+++GO:0006355///regulation of transcription, DNA-templated+++GO:0031060///regulation of histone methylation
685666	Vom2r9	1	0	2	0	0	0	0	1	1.58766	0.305783	0.502232		GO:0005887///integral component of plasma membrane+++GO:0005886///plasma membrane+++GO:0016020///membrane+++GO:0016021///integral component of membrane	GO:0004930///G protein-coupled receptor activity	GO:0007165///signal transduction+++GO:0007186///G protein-coupled receptor signaling pathway
690212	Slc16a5	0	1	1	1	0	0	1	0	1.58766	0.305783	0.502232		GO:0005887///integral component of plasma membrane+++GO:0016020///membrane+++GO:0016021///integral component of membrane	GO:0008028///monocarboxylic acid transmembrane transporter activity	GO:0055085///transmembrane transport+++GO:0015718///monocarboxylic acid transport
691033	LOC691033	0	1	0	2	0	0	0	1	1.58766	0.305783	0.502232				GO:0007165///signal transduction
78976	Kiss1r	1	2	2	1	2	0	0	0	1.58766	0.14753	0.302998	04080///Neuroactive ligand-receptor interaction	GO:0005886///plasma membrane+++GO:0016020///membrane+++GO:0009986///cell surface+++GO:0043231///intracellular membrane-bounded organelle+++GO:0016021///integral component of membrane+++GO:0005887///integral component of plasma membrane	GO:0008528///G protein-coupled peptide receptor activity+++GO:0004930///G protein-coupled receptor activity+++GO:0008188///neuropeptide receptor activity+++GO:0042923///neuropeptide binding	GO:0007218///neuropeptide signaling pathway+++GO:0007186///G protein-coupled receptor signaling pathway+++GO:0008285///negative regulation of cell proliferation+++GO:0050482///arachidonic acid secretion+++GO:0051496///positive regulation of stress fiber assembly+++GO:0050806///positive regulation of synaptic transmission+++GO:0046887///positive regulation of hormone secretion+++GO:0000186///activ…
81924	Cyp8b1	1	0	1	1	0	0	0	1	1.58766	0.305783	0.502232	01100///Metabolic pathways+++00120///Primary bile acid biosynthesis+++03320///PPAR signaling pathway	GO:0005783///endoplasmic reticulum+++GO:0005789///endoplasmic reticulum membrane+++GO:0016020///membrane	GO:0016705///oxidoreductase activity, acting on paired donors, with incorporation or reduction of molecular oxygen+++GO:0005506///iron ion binding+++GO:0020037///heme binding+++GO:0046872///metal ion binding+++GO:0008397///sterol 12-alpha-hydroxylase activity+++GO:0004497///monooxygenase activity	GO:0055114///oxidation-reduction process
83630	Pax4	0	2	1	0	0	0	0	1	1.58766	0.305783	0.502232		GO:0005634///nucleus	GO:0043565///sequence-specific DNA binding+++GO:0003677///DNA binding+++GO:0001227///DNA-binding transcription repressor activity, RNA polymerase II-specific+++GO:0000980///RNA polymerase II distal enhancer sequence-specific DNA binding+++GO:0003690///double-stranded DNA binding	GO:0043066///negative regulation of apoptotic process+++GO:0030154///cell differentiation+++GO:0000122///negative regulation of transcription by RNA polymerase II+++GO:0007275///multicellular organism development+++GO:0031016///pancreas development+++GO:0045597///positive regulation of cell differentiation+++GO:0042493///response to drug+++GO:0007623///circadian rhythm+++GO:0045595///regulation o…
100910172	LOC100910172	1.97	1.98	1	1	1	0	0	1	1.57558	0.151488	0.308566		GO:0005886///plasma membrane+++GO:0030426///growth cone+++GO:0005737///cytoplasm+++GO:0016607///nuclear speck+++GO:0005634///nucleus	GO:0044212///transcription regulatory region DNA binding+++GO:0005516///calmodulin binding+++GO:0003714///transcription corepressor activity	GO:0045892///negative regulation of transcription, DNA-templated
691998	Nlrp1b	2	0	1.03	0	0	0	0	1.02	1.57344	0.306535	0.502492	04621///NOD-like receptor signaling pathway	GO:0005634///nucleus+++GO:0005654///nucleoplasm+++GO:0072558///NLRP1 inflammasome complex+++GO:0005829///cytosol	GO:0005524///ATP binding+++GO:0019899///enzyme binding+++GO:0019904///protein domain specific binding	GO:0045087///innate immune response+++GO:1904784///NLRP1 inflammasome complex assembly+++GO:0030163///protein catabolic process+++GO:0032611///interleukin-1 beta production+++GO:0051402///neuron apoptotic process+++GO:0006954///inflammatory response+++GO:0032610///interleukin-1 alpha production+++GO:0006919///activation of cysteine-type endopeptidase activity involved in apoptotic process+++GO:00…
100361056	LOC100361056	3.13	2.25	3.27	4.5	1.16	1.15	1.08	1.1	1.55297	0.0348651	0.101437		GO:0016021///integral component of membrane
103690132	Hoxa1	3.56	3.42	3	0	0	2.84	0	0.57	1.55196	0.0661765	0.168156		GO:0005575///cellular_component+++GO:0005634///nucleus	GO:0003677///DNA binding+++GO:0003674///molecular_function+++GO:0043565///sequence-specific DNA binding	GO:0007275///multicellular organism development+++GO:0006355///regulation of transcription, DNA-templated+++GO:0008150///biological_process
25192	Klrb1b	5	0	1	3.62	0	1	1	1.3	1.54626	0.0720283	0.17967		GO:0016021///integral component of membrane	GO:0030246///carbohydrate binding
108349143	LOC108349143	3.53	0	7.87	8.15	3.77	0	0	2.99	1.53477	0.0107567	0.0392905			GO:0019863///IgE binding+++GO:0003676///nucleic acid binding	GO:0015074///DNA integration+++GO:0016032///viral process
100909648	LOC100909648	1.34	1.34	0	2.67	0	1.85	0	0	1.53471	0.182142	0.352136	04270///Vascular smooth muscle contraction+++04072///Phospholipase D signaling pathway+++04020///Calcium signaling pathway+++04080///Neuroactive ligand-receptor interaction	GO:0005887///integral component of plasma membrane+++GO:0005886///plasma membrane+++GO:0016021///integral component of membrane	GO:0005000///vasopressin receptor activity+++GO:0004930///G protein-coupled receptor activity+++GO:0017046///peptide hormone binding+++GO:0042803///protein homodimerization activity	GO:0045907///positive regulation of vasoconstriction+++GO:0032870///cellular response to hormone stimulus+++GO:0032849///positive regulation of cellular pH reduction+++GO:1901652///response to peptide+++GO:0007188///adenylate cyclase-modulating G protein-coupled receptor signaling pathway+++GO:0042538///hyperosmotic salinity response+++GO:0007186///G protein-coupled receptor signaling pathway+++G…
59113	Kmo	5	4	16	1	2	3	4	0	1.53321	0.00329158	0.0145313	00380///Tryptophan metabolism+++01100///Metabolic pathways	GO:0031966///mitochondrial membrane+++GO:0016020///membrane+++GO:0005615///extracellular space+++GO:0005741///mitochondrial outer membrane+++GO:0005739///mitochondrion+++GO:0016021///integral component of membrane	GO:0004497///monooxygenase activity+++GO:0050660///flavin adenine dinucleotide binding+++GO:0016491///oxidoreductase activity+++GO:0071949///FAD binding+++GO:0016174///NAD(P)H oxidase activity+++GO:0004502///kynurenine 3-monooxygenase activity	GO:0009435///NAD biosynthetic process+++GO:0034276///kynurenic acid biosynthetic process+++GO:0014049///positive regulation of glutamate secretion+++GO:1903296///positive regulation of glutamate secretion, neurotransmission+++GO:0097052///L-kynurenine metabolic process+++GO:0070189///kynurenine metabolic process+++GO:0032496///response to lipopolysaccharide+++GO:0043420///anthranilate metabolic p…
102546312	LOC102546312	1.12	1.06	0	1.08	1.13	0	0	0	1.53124	0.298456	0.495045	04512///ECM-receptor interaction+++04151///PI3K-Akt signaling pathway+++04810///Regulation of actin cytoskeleton+++04510///Focal adhesion	GO:0034681///integrin alpha11-beta1 complex+++GO:0005925///focal adhesion	GO:0098639///collagen binding involved in cell-matrix adhesion+++GO:0038064///collagen receptor activity+++GO:0046872///metal ion binding+++GO:0005518///collagen binding	GO:0007160///cell-matrix adhesion+++GO:0038065///collagen-activated signaling pathway+++GO:0006929///substrate-dependent cell migration+++GO:0033627///cell adhesion mediated by integrin+++GO:0007229///integrin-mediated signaling pathway
100912336	LOC100912336	3	10	10	0	0	0	6	2	1.52626	0.00586687	0.0236951		GO:0016020///membrane+++GO:0016021///integral component of membrane
687560	LOC687560	6	3	9	5	0	3	3	2	1.52626	0.00586687	0.0236951
305811	Rcor2	120.85	0	34.31	61.02	0	48.86	0	26.37	1.52555	3.07181e-17	9.52812e-16		GO:0005634///nucleus+++GO:0017053///transcriptional repressor complex+++GO:0005667///transcription factor complex+++GO:0000785///chromatin	GO:0003700///DNA-binding transcription factor activity+++GO:0008134///transcription factor binding+++GO:0044212///transcription regulatory region DNA binding+++GO:0005515///protein binding+++GO:0003677///DNA binding+++GO:0003714///transcription corepressor activity	GO:0045892///negative regulation of transcription, DNA-templated
502966	RGD1560539	2.3	2	0	2.3	0	2.3	0	0	1.52353	0.140499	0.293561	04623///Cytosolic DNA-sensing pathway+++04620///Toll-like receptor signaling pathway+++04621///NOD-like receptor signaling pathway+++04060///Cytokine-cytokine receptor interaction+++04217///Necroptosis+++04630///Jak-STAT signaling pathway+++04622///RIG-I-like receptor signaling pathway+++04151///PI3K-Akt signaling pathway+++04650///Natural killer cell mediated cytotoxicity	GO:0005576///extracellular region+++GO:0005615///extracellular space	GO:0005126///cytokine receptor binding+++GO:0005125///cytokine activity+++GO:0005132///type I interferon receptor binding	GO:0051607///defense response to virus+++GO:0043330///response to exogenous dsRNA+++GO:0002250///adaptive immune response+++GO:0006952///defense response+++GO:0006959///humoral immune response+++GO:0019221///cytokine-mediated signaling pathway+++GO:0010469///regulation of signaling receptor activity+++GO:0002286///T cell activation involved in immune response+++GO:0030183///B cell differentiation…
103694886	LOC103694886	2.37	3.88	2.97	12.38	0	2.2	2.63	2.72	1.51918	0.00779458	0.030105	04610///Complement and coagulation cascades	GO:0005576///extracellular region+++GO:0070062///extracellular exosome+++GO:0005579///membrane attack complex		GO:0006883///cellular sodium ion homeostasis+++GO:0006956///complement activation+++GO:0006958///complement activation, classical pathway+++GO:0006957///complement activation, alternative pathway+++GO:0019835///cytolysis+++GO:0030449///regulation of complement activation
687553	Foxl1	5	4	4	7	1	1	2	3	1.51727	0.0105269	0.0386887		GO:0005634///nucleus	GO:0003677///DNA binding+++GO:0043565///sequence-specific DNA binding+++GO:0003700///DNA-binding transcription factor activity+++GO:0000981///DNA-binding transcription factor activity, RNA polymerase II-specific	GO:0061146///Peyer's patch morphogenesis+++GO:0030166///proteoglycan biosynthetic process+++GO:0006355///regulation of transcription, DNA-templated+++GO:0030154///cell differentiation+++GO:0007507///heart development+++GO:0006357///regulation of transcription by RNA polymerase II+++GO:0009653///anatomical structure morphogenesis+++GO:0030111///regulation of Wnt signaling pathway+++GO:0007495///vi…
100360307	Fam83g	4	3	5	5	0	3	1	2	1.50519	0.0190518	0.0629552		GO:0005829///cytosol+++GO:0005634///nucleus		GO:0030509///BMP signaling pathway
679784	Slc17a4	6	4	3	4	1	2	0	3	1.50519	0.0190518	0.0629552		GO:0005764///lysosome+++GO:0016021///integral component of membrane+++GO:0016020///membrane+++GO:0005887///integral component of plasma membrane	GO:0015136///sialic acid transmembrane transporter activity	GO:0015739///sialic acid transport+++GO:0055085///transmembrane transport
304407	Cldn4	5	3.06	5	1.04	1	2	1.04	1	1.48689	0.0343502	0.100276	04514///Cell adhesion molecules (CAMs)+++04670///Leukocyte transendothelial migration+++04530///Tight junction	GO:0016020///membrane+++GO:0005923///bicellular tight junction+++GO:0016324///apical plasma membrane+++GO:0030054///cell junction+++GO:0005886///plasma membrane+++GO:0016021///integral component of membrane+++GO:0016327///apicolateral plasma membrane+++GO:0005887///integral component of plasma membrane+++GO:0009925///basal plasma membrane+++GO:0016328///lateral plasma membrane	GO:0003674///molecular_function+++GO:0005254///chloride channel activity+++GO:0005198///structural molecule activity	GO:0061436///establishment of skin barrier+++GO:0070293///renal absorption+++GO:0032570///response to progesterone+++GO:0007565///female pregnancy+++GO:1902476///chloride transmembrane transport+++GO:0007623///circadian rhythm
363215	Prss39	5	7	1.77	3	0	0	1	5	1.48554	0.0211085	0.0683809		GO:0031410///cytoplasmic vesicle+++GO:0001669///acrosomal vesicle+++GO:0005615///extracellular space+++GO:0005576///extracellular region	GO:0016787///hydrolase activity+++GO:0008233///peptidase activity+++GO:0004252///serine-type endopeptidase activity+++GO:0008236///serine-type peptidase activity	GO:0006508///proteolysis
309209	Vwce	9.53	8	20.59	16.6	0	8.58	4.19	6.89	1.4795	3.28205e-05	0.000243881		GO:0005576///extracellular region+++GO:0005737///cytoplasm	GO:0005509///calcium ion binding	GO:0098586///cellular response to virus
305858	Otx2	10.63	17.15	13.18	18.45	5.14	5.33	4.09	6.92	1.47041	1.65141e-05	0.000129535		GO:0005634///nucleus	GO:0003700///DNA-binding transcription factor activity+++GO:0043565///sequence-specific DNA binding+++GO:0003677///DNA binding	GO:0007275///multicellular organism development+++GO:0006355///regulation of transcription, DNA-templated
685860	Lrr1	2	2	7	0	0	1	3	0	1.46212	0.0649376	0.165804		GO:0005886///plasma membrane+++GO:0005737///cytoplasm+++GO:0005829///cytosol		GO:0016567///protein ubiquitination+++GO:0007165///signal transduction+++GO:0043687///post-translational protein modification+++GO:0015698///inorganic anion transport
288456	RGD1560801	1	0	0	1.72	1	0	0	0	1.4463	0.362635	0.559085	04621///NOD-like receptor signaling pathway	GO:0012506///vesicle membrane+++GO:0005829///cytosol+++GO:0015629///actin cytoskeleton+++GO:0005886///plasma membrane+++GO:0005576///extracellular region+++GO:0005737///cytoplasm+++GO:0000139///Golgi membrane+++GO:0005794///Golgi apparatus	GO:0019955///cytokine binding+++GO:0003779///actin binding+++GO:0005525///GTP binding+++GO:0042802///identical protein binding+++GO:0051879///Hsp90 protein binding+++GO:0003924///GTPase activity+++GO:0019003///GDP binding+++GO:0042803///protein homodimerization activity+++GO:0030507///spectrin binding+++GO:0019899///enzyme binding	GO:1903076///regulation of protein localization to plasma membrane+++GO:0071347///cellular response to interleukin-1+++GO:0051260///protein homooligomerization+++GO:0071346///cellular response to interferon-gamma+++GO:0060333///interferon-gamma-mediated signaling pathway+++GO:1903077///negative regulation of protein localization to plasma membrane+++GO:1900041///negative regulation of interleukin…
685245	Ears2l1	13.86	0	22.85	18.49	12.32	8.19	0	0	1.43103	4.7312e-05	0.000338998	00970///Aminoacyl-tRNA biosynthesis+++01100///Metabolic pathways+++01110///Biosynthesis of secondary metabolites+++01120///Microbial metabolism in diverse environments+++00860///Porphyrin and chlorophyll metabolism	GO:0005739///mitochondrion+++GO:0005759///mitochondrial matrix	GO:0004818///glutamate-tRNA ligase activity+++GO:0000049///tRNA binding+++GO:0008270///zinc ion binding+++GO:0005524///ATP binding+++GO:0050561///glutamate-tRNA(Gln) ligase activity	GO:0070127///tRNA aminoacylation for mitochondrial protein translation+++GO:0006424///glutamyl-tRNA aminoacylation
108353403	LOC108353403	9.23	1.58	14.55	2	3.25	1.05	3.3	2.58	1.42902	0.00421884	0.0179348
366992	Kb15	3	4	2.04	2.03	2.14	0	2	0	1.42165	0.0698375	0.17533		GO:0005882///intermediate filament+++GO:0045095///keratin filament	GO:0005198///structural molecule activity	GO:0031424///keratinization+++GO:0008544///epidermis development+++GO:0070268///cornification+++GO:0031581///hemidesmosome assembly
103693626	LOC103693626	1.99	0	5.97	0	0	0	2.98	0	1.42015	0.124507	0.26949	04145///Phagosome+++04625///C-type lectin receptor signaling pathway	GO:0016021///integral component of membrane	GO:0046872///metal ion binding+++GO:0005537///mannose binding	GO:0002250///adaptive immune response+++GO:0045087///innate immune response+++GO:0007155///cell adhesion+++GO:0006897///endocytosis
24235	C4bpa	2	1	4	1	1	2	0	0	1.41773	0.124048	0.268908	04610///Complement and coagulation cascades	GO:0005576///extracellular region	GO:0001848///complement binding	GO:0002376///immune system process+++GO:0006958///complement activation, classical pathway+++GO:0006955///immune response+++GO:0045087///innate immune response
288596	Trim50	3	2	1	2	1	1	0	1	1.41773	0.124048	0.268908		GO:0005737///cytoplasm+++GO:0016235///aggresome+++GO:0005829///cytosol	GO:0046872///metal ion binding+++GO:0016740///transferase activity+++GO:0008270///zinc ion binding+++GO:0042802///identical protein binding	GO:0070201///regulation of establishment of protein localization
363768	Zpld1	4	2	1	1	0	2	1	0	1.41773	0.124048	0.268908		GO:0030659///cytoplasmic vesicle membrane+++GO:0016021///integral component of membrane+++GO:0005576///extracellular region
494193	Klra2	1	6	1	0	0	1	1	1	1.41773	0.124048	0.268908		GO:0005886///plasma membrane+++GO:0016021///integral component of membrane	GO:0030246///carbohydrate binding	GO:0007155///cell adhesion
685963	LOC685963	60.5	60.7	78.04	69.37	0	40.47	20.23	40.47	1.41142	6.56506e-19	2.22873e-17	03010///Ribosome	GO:0005829///cytosol+++GO:0022625///cytosolic large ribosomal subunit+++GO:0005925///focal adhesion+++GO:0014069///postsynaptic density+++GO:0042788///polysomal ribosome+++GO:0033291///eukaryotic 80S initiation complex	GO:0003723///RNA binding+++GO:0003735///structural constituent of ribosome	GO:0034463///90S preribosome assembly+++GO:0001501///skeletal system development+++GO:0048318///axial mesoderm development+++GO:0001503///ossification+++GO:0002181///cytoplasmic translation+++GO:0007605///sensory perception of sound+++GO:0006413///translational initiation+++GO:0022618///ribonucleoprotein complex assembly+++GO:0006417///regulation of translation+++GO:0042474///middle ear morphogen…
108352618	LOC108352618	4	5.1	6.65	2	4.38	2.33	0	0	1.40613	0.0228011	0.0725558		GO:0016021///integral component of membrane	GO:0003676///nucleic acid binding+++GO:0019863///IgE binding	GO:0016032///viral process+++GO:0015074///DNA integration
364629	Tpte2	2.55	4.51	4.55	4.5	0	0	1.49	4.64	1.39669	0.0309284	0.0923392		GO:0000139///Golgi membrane+++GO:0016021///integral component of membrane+++GO:0005789///endoplasmic reticulum membrane	GO:0051800///phosphatidylinositol-3,4-bisphosphate 3-phosphatase activity+++GO:0016314///phosphatidylinositol-3,4,5-trisphosphate 3-phosphatase activity+++GO:0004725///protein tyrosine phosphatase activity+++GO:0008138///protein tyrosine/serine/threonine phosphatase activity	GO:0006661///phosphatidylinositol biosynthetic process
100360774	LOC100360774	2.65	0	0	0	0	0.53	0.48	0	1.39433	0.382056	0.578859		GO:0005887///integral component of plasma membrane+++GO:0005886///plasma membrane	GO:0017124///SH3 domain binding	GO:0002244///hematopoietic progenitor cell differentiation+++GO:0007010///cytoskeleton organization+++GO:0050766///positive regulation of phagocytosis+++GO:0097530///granulocyte migration+++GO:1900016///negative regulation of cytokine production involved in inflammatory response+++GO:0007160///cell-matrix adhesion+++GO:0006911///phagocytosis, engulfment+++GO:0016477///cell migration+++GO:0006910/…
301595	Ugt1a8	17.21	8.61	7.34	8.17	0	10.57	0	5.26	1.38722	0.000584537	0.00321935	00982///Drug metabolism - cytochrome P450+++00140///Steroid hormone biosynthesis+++00830///Retinol metabolism+++00860///Porphyrin and chlorophyll metabolism+++00980///Metabolism of xenobiotics by cytochrome P450+++00040///Pentose and glucuronate interconversions+++01100///Metabolic pathways+++00053///Ascorbate and aldarate metabolism+++00983///Drug metabolism - other enzymes+++01110///Biosynthesi…	GO:0016021///integral component of membrane+++GO:0016020///membrane+++GO:0005575///cellular_component	GO:0016740///transferase activity+++GO:0016757///transferase activity, transferring glycosyl groups+++GO:0016758///transferase activity, transferring hexosyl groups+++GO:0015020///glucuronosyltransferase activity+++GO:0003674///molecular_function	GO:0008150///biological_process
498335	Cxcl13	84	95	272	64	42	36	52	68	1.38177	1.02833e-33	6.57196e-32	04060///Cytokine-cytokine receptor interaction+++04062///Chemokine signaling pathway	GO:0005576///extracellular region+++GO:0005615///extracellular space	GO:0008009///chemokine activity	GO:0061844///antimicrobial humoral immune response mediated by antimicrobial peptide+++GO:0030593///neutrophil chemotaxis+++GO:0006935///chemotaxis+++GO:0006955///immune response+++GO:0006954///inflammatory response+++GO:0070098///chemokine-mediated signaling pathway+++GO:0006952///defense response+++GO:0071222///cellular response to lipopolysaccharide+++GO:0035754///B cell chemotaxis+++GO:003059…
289337	Tlr5	20	49	162	29	14	29	48	9	1.3812	8.2314e-18	2.65257e-16	04620///Toll-like receptor signaling pathway	GO:0016021///integral component of membrane+++GO:0016020///membrane	GO:0003674///molecular_function+++GO:0004888///transmembrane signaling receptor activity	GO:0007165///signal transduction+++GO:0008584///male gonad development+++GO:0042742///defense response to bacterium+++GO:0001819///positive regulation of cytokine production+++GO:0045429///positive regulation of nitric oxide biosynthetic process+++GO:0034146///toll-like receptor 5 signaling pathway+++GO:0002755///MyD88-dependent toll-like receptor signaling pathway+++GO:0071222///cellular respons…
25370	Adora3	2.35	0	3.63	8.49	3.12	0	1.31	1.16	1.37484	0.0432962	0.120623	04080///Neuroactive ligand-receptor interaction+++04022///cGMP-PKG signaling pathway+++04071///Sphingolipid signaling pathway	GO:0016021///integral component of membrane+++GO:0098685///Schaffer collateral - CA1 synapse+++GO:0042734///presynaptic membrane+++GO:0016020///membrane+++GO:0005886///plasma membrane	GO:0001609///G protein-coupled adenosine receptor activity+++GO:0004930///G protein-coupled receptor activity	GO:2000300///regulation of synaptic vesicle exocytosis+++GO:0007186///G protein-coupled receptor signaling pathway+++GO:0007165///signal transduction+++GO:0014061///regulation of norepinephrine secretion+++GO:0001973///adenosine receptor signaling pathway
300124	Pkdrej	4	6	5	3	2	0	0	5	1.36526	0.0249667	0.0780068		GO:0016021///integral component of membrane+++GO:0016020///membrane	GO:0005262///calcium channel activity+++GO:0005509///calcium ion binding	GO:0050982///detection of mechanical stimulus+++GO:0070588///calcium ion transmembrane transport
365962	Slc44a5	1	4	9	4	1	1	2	3	1.36526	0.0249667	0.0780068		GO:0016021///integral component of membrane+++GO:0016020///membrane
691519	LOC691519	10.35	12.6	17.96	16.61	4.11	10.04	5	3.22	1.36519	6.13601e-05	0.000428216		GO:0005813///centrosome		GO:0045599///negative regulation of fat cell differentiation
102550614	LOC102550614	3	1	4	3	0	2	0	2.28	1.36451	0.079799	0.194096	04740///Olfactory transduction	GO:0005886///plasma membrane+++GO:0016021///integral component of membrane	GO:0004888///transmembrane signaling receptor activity+++GO:0004984///olfactory receptor activity+++GO:0004930///G protein-coupled receptor activity	GO:0007186///G protein-coupled receptor signaling pathway+++GO:0050907///detection of chemical stimulus involved in sensory perception
100360872	Mcpt1l1	39.98	166.97	502.98	97.99	44.94	80	130.87	60	1.35785	1.38935e-50	1.37099e-48	04614///Renin-angiotensin system	GO:0005576///extracellular region+++GO:0005615///extracellular space+++GO:0005737///cytoplasm	GO:0008233///peptidase activity+++GO:0016787///hydrolase activity+++GO:0008236///serine-type peptidase activity+++GO:0004252///serine-type endopeptidase activity	GO:0006508///proteolysis
308428	Irgc	4	9	5	5	1	1	5	2	1.35633	0.0116837	0.0420794	04668///TNF signaling pathway	GO:0016020///membrane	GO:0000166///nucleotide binding+++GO:0016787///hydrolase activity+++GO:0005525///GTP binding+++GO:0003924///GTPase activity
108352174	LOC108352174	1.08	1.37	3.78	2.04	1.08	2.16	0	0	1.35459	0.130908	0.279218
292850	Klk10	0.78	0	0	1	0.7	0	0	0	1.34914	0.484782	0.672985		GO:0005576///extracellular region	GO:0004252///serine-type endopeptidase activity+++GO:0008236///serine-type peptidase activity	GO:0007049///cell cycle
108352465	LOC108352465	19.4	13.3	15.32	8.83	4.7	6.59	1.65	9.6	1.33737	8.7901e-05	0.000590919		GO:0016459///myosin complex	GO:0003774///motor activity+++GO:0003779///actin binding+++GO:0005524///ATP binding
108349728	LOC108349728	3.44	1.42	0.33	4.05	2	0	0	1.67	1.33481	0.114393	0.253152	04080///Neuroactive ligand-receptor interaction	GO:0016021///integral component of membrane+++GO:0005886///plasma membrane	GO:0001594///trace-amine receptor activity
100911485	LOC100911485	22.53	38.66	7.48	7.02	7.69	7.61	0	14.86	1.33016	6.59297e-06	5.58803e-05	04137///Mitophagy - animal+++04214///Apoptosis - fly+++04621///NOD-like receptor signaling pathway	GO:0005739///mitochondrion+++GO:0005741///mitochondrial outer membrane+++GO:0016020///membrane+++GO:0016021///integral component of membrane	GO:0003924///GTPase activity+++GO:0005525///GTP binding	GO:0008053///mitochondrial fusion+++GO:0048662///negative regulation of smooth muscle cell proliferation+++GO:0120162///positive regulation of cold-induced thermogenesis
680920	LOC680920	4	6.37	2.41	2.76	0	2.95	2.25	1	1.32834	0.0413736	0.116167		GO:0016021///integral component of membrane+++GO:0016020///membrane	GO:0005515///protein binding
102547118	LOC102547118	3	0	2	0	2	0	0	0	1.32462	0.248286	0.436843	04723///Retrograde endocannabinoid signaling+++04727///GABAergic synapse+++04080///Neuroactive ligand-receptor interaction	GO:0005576///extracellular region
170570	Acot12	4	3	2	1	2	0	1	1	1.32462	0.102523	0.232988	00620///Pyruvate metabolism	GO:0005829///cytosol+++GO:0005737///cytoplasm	GO:0003824///catalytic activity+++GO:0036042///long-chain fatty acyl-CoA binding+++GO:0016790///thiolester hydrolase activity+++GO:0047617///acyl-CoA hydrolase activity+++GO:0005524///ATP binding+++GO:0016787///hydrolase activity+++GO:0008289///lipid binding+++GO:0000062///fatty-acyl-CoA binding+++GO:0052689///carboxylic ester hydrolase activity+++GO:0016290///palmitoyl-CoA hydrolase activity+++G…	GO:0006637///acyl-CoA metabolic process+++GO:1900535///palmitic acid biosynthetic process+++GO:0006090///pyruvate metabolic process+++GO:0006631///fatty acid metabolic process+++GO:0006084///acetyl-CoA metabolic process+++GO:0008152///metabolic process+++GO:0006629///lipid metabolic process
245921	Acvr1c	0	0	0	5	0	0	2	0	1.32462	0.248286	0.436843	04350///TGF-beta signaling pathway+++04060///Cytokine-cytokine receptor interaction+++04550///Signaling pathways regulating pluripotency of stem cells	GO:0005737///cytoplasm+++GO:0005886///plasma membrane+++GO:0016021///integral component of membrane+++GO:0005887///integral component of plasma membrane+++GO:0043235///receptor complex+++GO:0016020///membrane+++GO:0009986///cell surface+++GO:0048179///activin receptor complex	GO:0046872///metal ion binding+++GO:0004672///protein kinase activity+++GO:0004675///transmembrane receptor protein serine/threonine kinase activity+++GO:0046332///SMAD binding+++GO:0004674///protein serine/threonine kinase activity+++GO:0016301///kinase activity+++GO:0005524///ATP binding+++GO:0016361///activin receptor activity, type I+++GO:0070700///BMP receptor binding+++GO:0038100///nodal bi…	GO:1901164///negative regulation of trophoblast cell migration+++GO:0007181///transforming growth factor beta receptor complex assembly+++GO:0019915///lipid storage+++GO:0030901///midbrain development+++GO:0032924///activin receptor signaling pathway+++GO:0033993///response to lipid+++GO:0021766///hippocampus development+++GO:0021549///cerebellum development+++GO:0032868///response to insulin+++G…
25430	Dio1	0	3	0	2	0	2	0	0	1.32462	0.248286	0.436843	04919///Thyroid hormone signaling pathway	GO:0016020///membrane+++GO:0016021///integral component of membrane+++GO:0005789///endoplasmic reticulum membrane+++GO:0005783///endoplasmic reticulum	GO:0004800///thyroxine 5'-deiodinase activity+++GO:0016491///oxidoreductase activity	GO:0055114///oxidation-reduction process+++GO:0042403///thyroid hormone metabolic process+++GO:0006091///generation of precursor metabolites and energy+++GO:0042446///hormone biosynthetic process
25735	Hnf4a	3	1	1	0	0	0	0	2	1.32462	0.248286	0.436843	04152///AMPK signaling pathway	GO:0005654///nucleoplasm+++GO:0005737///cytoplasm+++GO:0005634///nucleus	GO:0050544///arachidonic acid binding+++GO:0046872///metal ion binding+++GO:0070491///repressing transcription factor binding+++GO:0004879///nuclear receptor activity+++GO:0003707///steroid hormone receptor activity+++GO:0036042///long-chain fatty acyl-CoA binding+++GO:0000987///proximal promoter sequence-specific DNA binding+++GO:0043565///sequence-specific DNA binding+++GO:0016290///palmitoyl-C…	GO:0031667///response to nutrient levels+++GO:0071548///response to dexamethasone+++GO:0070365///hepatocyte differentiation+++GO:0030336///negative regulation of cell migration+++GO:0006637///acyl-CoA metabolic process+++GO:1902569///negative regulation of activation of Janus kinase activity+++GO:0042632///cholesterol homeostasis+++GO:0051591///response to cAMP+++GO:0045944///positive regulation …
289038	Mgat4e	1	8	1	5	3	1	2	0	1.32462	0.0455336	0.125688		GO:0016020///membrane+++GO:0016021///integral component of membrane	GO:0016757///transferase activity, transferring glycosyl groups	GO:0006486///protein glycosylation
291558	RGD1562699	2	2	1	0	1	0	0	1	1.32462	0.248286	0.436843
29180	Uts2	1	4	10	5	2	3	3	0	1.32462	0.0209411	0.0679368		GO:0005576///extracellular region+++GO:0005623///cell+++GO:0005615///extracellular space	GO:0051429///corticotropin-releasing hormone receptor binding+++GO:0005179///hormone activity+++GO:0042562///hormone binding+++GO:0001664///G protein-coupled receptor binding+++GO:0051431///corticotropin-releasing hormone receptor 2 binding	GO:0010763///positive regulation of fibroblast migration+++GO:0046882///negative regulation of follicle-stimulating hormone secretion+++GO:0031669///cellular response to nutrient levels+++GO:0045776///negative regulation of blood pressure+++GO:0008283///cell proliferation+++GO:0009755///hormone-mediated signaling pathway+++GO:0010469///regulation of signaling receptor activity+++GO:0035902///resp…
293741	Ms4a12	3	6	12	4	2	0	4	4	1.32462	0.00983462	0.0365678		GO:0016020///membrane+++GO:0016021///integral component of membrane
29589	Pou3f4	2	1	1	1	0	0	0	2	1.32462	0.248286	0.436843		GO:0005634///nucleus	GO:0003680///AT DNA binding+++GO:0000977///RNA polymerase II regulatory region sequence-specific DNA binding+++GO:0003700///DNA-binding transcription factor activity+++GO:0043565///sequence-specific DNA binding+++GO:0003690///double-stranded DNA binding+++GO:0003677///DNA binding	GO:2001054///negative regulation of mesenchymal cell apoptotic process+++GO:0007605///sensory perception of sound+++GO:0090103///cochlea morphogenesis+++GO:0006357///regulation of transcription by RNA polymerase II+++GO:0021879///forebrain neuron differentiation+++GO:0006355///regulation of transcription, DNA-templated+++GO:0006366///transcription by RNA polymerase II+++GO:0048839///inner ear dev…
296323	Arhgap40	2	1	0	2	0	1	1	0	1.32462	0.248286	0.436843		GO:0005737///cytoplasm	GO:0005096///GTPase activator activity	GO:0043547///positive regulation of GTPase activity+++GO:0030833///regulation of actin filament polymerization+++GO:0007165///signal transduction+++GO:0051056///regulation of small GTPase mediated signal transduction+++GO:0032956///regulation of actin cytoskeleton organization
298881	Nt5c1b	1	0	2	2	1	0	1	0	1.32462	0.248286	0.436843	01110///Biosynthesis of secondary metabolites+++00240///Pyrimidine metabolism+++00760///Nicotinate and nicotinamide metabolism+++01100///Metabolic pathways+++00230///Purine metabolism	GO:0005783///endoplasmic reticulum+++GO:0005829///cytosol+++GO:0005737///cytoplasm	GO:0000287///magnesium ion binding+++GO:0008253///5'-nucleotidase activity+++GO:0000166///nucleotide binding+++GO:0008106///alcohol dehydrogenase (NADP+) activity	GO:0016311///dephosphorylation+++GO:0046085///adenosine metabolic process+++GO:0042572///retinol metabolic process+++GO:0009116///nucleoside metabolic process+++GO:0009117///nucleotide metabolic process+++GO:0055114///oxidation-reduction process
353218	Tnfsf9	2	6	9	3	0	4	3	1	1.32462	0.0209411	0.0679368	04060///Cytokine-cytokine receptor interaction	GO:0005886///plasma membrane+++GO:0016020///membrane+++GO:0016021///integral component of membrane+++GO:0005575///cellular_component+++GO:0005615///extracellular space	GO:0003674///molecular_function+++GO:0005164///tumor necrosis factor receptor binding+++GO:0005125///cytokine activity+++GO:0005102///signaling receptor binding+++GO:0032813///tumor necrosis factor receptor superfamily binding	GO:0042104///positive regulation of activated T cell proliferation+++GO:0032735///positive regulation of interleukin-12 production+++GO:0032755///positive regulation of interleukin-6 production+++GO:0042127///regulation of cell proliferation+++GO:0032729///positive regulation of interferon-gamma production+++GO:0010469///regulation of signaling receptor activity+++GO:0006955///immune response+++G…
66022	Kcns2	3	7	3	2	2	2	1	1	1.32462	0.0455336	0.125688		GO:0008076///voltage-gated potassium channel complex+++GO:0016020///membrane+++GO:0005886///plasma membrane+++GO:0048471///perinuclear region of cytoplasm+++GO:0016021///integral component of membrane	GO:0005216///ion channel activity+++GO:0005244///voltage-gated ion channel activity+++GO:0005267///potassium channel activity+++GO:0005249///voltage-gated potassium channel activity	GO:0006811///ion transport+++GO:0006813///potassium ion transport+++GO:0071805///potassium ion transmembrane transport+++GO:0034765///regulation of ion transmembrane transport+++GO:1902259///regulation of delayed rectifier potassium channel activity+++GO:0055085///transmembrane transport+++GO:0051260///protein homooligomerization
680875	LOC680875	1	0	1	3	1	1	0	0	1.32462	0.248286	0.436843		GO:0005856///cytoskeleton	GO:0008017///microtubule binding	GO:0007155///cell adhesion+++GO:0007229///integrin-mediated signaling pathway+++GO:0030177///positive regulation of Wnt signaling pathway+++GO:0010632///regulation of epithelial cell migration+++GO:0045104///intermediate filament cytoskeleton organization+++GO:0048870///cell motility+++GO:0043001///Golgi to plasma membrane protein transport+++GO:0051893///regulation of focal adhesion assembly+++G…
681033	Prss41	5	2	0	3	1	1	1	1	1.32462	0.102523	0.232988		GO:0043229///intracellular organelle+++GO:0005886///plasma membrane	GO:0008233///peptidase activity+++GO:0004252///serine-type endopeptidase activity+++GO:0008236///serine-type peptidase activity+++GO:0016787///hydrolase activity	GO:0006508///proteolysis
85259	Cnga1	1	1	2	1	2	0	0	0	1.32462	0.248286	0.436843	04024///cAMP signaling pathway+++04022///cGMP-PKG signaling pathway+++04744///Phototransduction	GO:0017071///intracellular cyclic nucleotide activated cation channel complex+++GO:0042622///photoreceptor outer segment membrane+++GO:0005737///cytoplasm+++GO:0016020///membrane+++GO:0001750///photoreceptor outer segment+++GO:0043195///terminal bouton+++GO:0016021///integral component of membrane	GO:0005223///intracellular cGMP-activated cation channel activity+++GO:0000166///nucleotide binding+++GO:0005221///intracellular cyclic nucleotide activated cation channel activity+++GO:0005216///ion channel activity+++GO:0030553///cGMP binding+++GO:0005222///intracellular cAMP-activated cation channel activity	GO:0055085///transmembrane transport+++GO:0050896///response to stimulus+++GO:0007283///spermatogenesis+++GO:0007601///visual perception+++GO:0051899///membrane depolarization+++GO:0098655///cation transmembrane transport+++GO:0006811///ion transport+++GO:0051480///regulation of cytosolic calcium ion concentration
288995	Gpr39	1	0	1.49	0	0	0	0	1	1.31884	0.416796	0.612632		GO:0016021///integral component of membrane+++GO:0016020///membrane	GO:0004930///G protein-coupled receptor activity	GO:0007165///signal transduction+++GO:0007186///G protein-coupled receptor signaling pathway
289309	Kif28p	2.02	0	0	3	0	0	1	1.02	1.31603	0.249718	0.438208		GO:0005871///kinesin complex+++GO:0031966///mitochondrial membrane+++GO:0005874///microtubule+++GO:0005739///mitochondrion+++GO:0016020///membrane+++GO:0005622///intracellular	GO:0003777///microtubule motor activity+++GO:0005524///ATP binding+++GO:0000166///nucleotide binding+++GO:0008017///microtubule binding+++GO:0016887///ATPase activity	GO:0030705///cytoskeleton-dependent intracellular transport+++GO:0072384///organelle transport along microtubule+++GO:0007018///microtubule-based movement+++GO:0007005///mitochondrion organization
353303	Col23a1	0	0	0	11.1	4.47	0	0	0	1.31491	0.0871808	0.207027		GO:0005886///plasma membrane+++GO:0005615///extracellular space+++GO:0016021///integral component of membrane+++GO:0009986///cell surface+++GO:0005581///collagen trimer	GO:0042803///protein homodimerization activity+++GO:0042802///identical protein binding+++GO:0008201///heparin binding	GO:0070207///protein homotrimerization
170847	Kcnj15	100.02	62.03	221.58	197.67	43.84	36.02	78.82	76.37	1.30901	5.85825e-35	3.99894e-33	04971///Gastric acid secretion	GO:0016021///integral component of membrane+++GO:0005886///plasma membrane+++GO:0016020///membrane	GO:0005242///inward rectifier potassium channel activity+++GO:0005244///voltage-gated ion channel activity	GO:0034765///regulation of ion transmembrane transport+++GO:0006813///potassium ion transport+++GO:0006811///ion transport+++GO:1990573///potassium ion import across plasma membrane
685181	LOC685181	1.98	4	4.25	0	0	1.56	0	2.58	1.3078	0.102008	0.232108		GO:0005886///plasma membrane+++GO:0016021///integral component of membrane	GO:0042288///MHC class I protein binding	GO:0045671///negative regulation of osteoclast differentiation+++GO:0007169///transmembrane receptor protein tyrosine kinase signaling pathway+++GO:0001773///myeloid dendritic cell activation
59327	Twist2	25	29	54	22	5	12	18	18	1.29714	6.94199e-09	9.56658e-08		GO:0005730///nucleolus+++GO:0005575///cellular_component+++GO:0005737///cytoplasm+++GO:0005634///nucleus	GO:0003674///molecular_function+++GO:0003677///DNA binding+++GO:0046983///protein dimerization activity	GO:0030335///positive regulation of cell migration+++GO:0007275///multicellular organism development+++GO:0030154///cell differentiation+++GO:0045892///negative regulation of transcription, DNA-templated+++GO:0045668///negative regulation of osteoblast differentiation+++GO:0043066///negative regulation of apoptotic process
686129	LOC686129	0	1.42	0	0	0	0.58	0	0	1.29446	0.545574	0.726504	04060///Cytokine-cytokine receptor interaction+++04350///TGF-beta signaling pathway+++04390///Hippo signaling pathway+++04550///Signaling pathways regulating pluripotency of stem cells	GO:0005901///caveola+++GO:0009897///external side of plasma membrane+++GO:0043025///neuronal cell body+++GO:0030425///dendrite+++GO:0016021///integral component of membrane	GO:0005524///ATP binding+++GO:0042803///protein homodimerization activity+++GO:0000981///DNA-binding transcription factor activity, RNA polymerase II-specific+++GO:0046332///SMAD binding+++GO:0046872///metal ion binding+++GO:0098821///BMP receptor activity	GO:0045669///positive regulation of osteoblast differentiation+++GO:0021998///neural plate mediolateral regionalization+++GO:0002062///chondrocyte differentiation+++GO:0009950///dorsal/ventral axis specification+++GO:1904414///positive regulation of cardiac ventricle development+++GO:0035137///hindlimb morphogenesis+++GO:0050679///positive regulation of epithelial cell proliferation+++GO:0007398/…
102547956	LOC102547956	1.04	4.65	3.04	2.29	0	1.52	1.52	1.48	1.28842	0.0934172	0.217657		GO:0005634///nucleus	GO:0042826///histone deacetylase binding+++GO:0003682///chromatin binding+++GO:0046872///metal ion binding+++GO:0000978///RNA polymerase II proximal promoter sequence-specific DNA binding	GO:0043433///negative regulation of DNA-binding transcription factor activity+++GO:0045668///negative regulation of osteoblast differentiation+++GO:0030154///cell differentiation+++GO:0006351///transcription, DNA-templated+++GO:0000122///negative regulation of transcription by RNA polymerase II
304922	Fmo6	6.04	4.24	1.04	1.01	0	0	4.05	1.01	1.28766	0.0761067	0.187195	01120///Microbial metabolism in diverse environments+++00982///Drug metabolism - cytochrome P450	GO:0016021///integral component of membrane+++GO:0005783///endoplasmic reticulum+++GO:0031090///organelle membrane+++GO:0005789///endoplasmic reticulum membrane+++GO:0043231///intracellular membrane-bounded organelle+++GO:0016020///membrane	GO:0050661///NADP binding+++GO:0050660///flavin adenine dinucleotide binding+++GO:0016491///oxidoreductase activity+++GO:0004499///N,N-dimethylaniline monooxygenase activity+++GO:0004497///monooxygenase activity	GO:0055114///oxidation-reduction process
103689957	LOC103689957	10.99	7.03	5.59	12.45	9.45	0	2.8	2.58	1.28457	0.0024643	0.0113254		GO:0005694///chromosome+++GO:0005737///cytoplasm+++GO:0005730///nucleolus+++GO:0000151///ubiquitin ligase complex+++GO:0005634///nucleus+++GO:0005829///cytosol	GO:0004842///ubiquitin-protein transferase activity+++GO:0008270///zinc ion binding+++GO:0016274///protein-arginine N-methyltransferase activity	GO:0006511///ubiquitin-dependent protein catabolic process+++GO:0016567///protein ubiquitination+++GO:0043687///post-translational protein modification+++GO:0006464///cellular protein modification process+++GO:0000209///protein polyubiquitination+++GO:0007605///sensory perception of sound
170896	Ucn2	0	4	11	2	3	3	1	0	1.2828	0.0378368	0.108207		GO:0030424///axon+++GO:0043679///axon terminus+++GO:0005576///extracellular region+++GO:0043196///varicosity+++GO:0043005///neuron projection+++GO:0005615///extracellular space	GO:0005179///hormone activity+++GO:0001664///G protein-coupled receptor binding+++GO:0051429///corticotropin-releasing hormone receptor binding+++GO:0051431///corticotropin-releasing hormone receptor 2 binding	GO:0009749///response to glucose+++GO:0071456///cellular response to hypoxia+++GO:0045838///positive regulation of membrane potential+++GO:0031669///cellular response to nutrient levels+++GO:0042594///response to starvation+++GO:0010469///regulation of signaling receptor activity+++GO:0051412///response to corticosterone+++GO:0035902///response to immobilization stress+++GO:0007586///digestion+++…
303496	Tbx21	4	4	4	5	2	4	1	0	1.2828	0.0378368	0.108207	04659///Th17 cell differentiation+++04658///Th1 and Th2 cell differentiation	GO:0043025///neuronal cell body+++GO:0005634///nucleus	GO:0043565///sequence-specific DNA binding+++GO:0003700///DNA-binding transcription factor activity+++GO:0044212///transcription regulatory region DNA binding+++GO:0003677///DNA binding	GO:0045893///positive regulation of transcription, DNA-templated+++GO:2000329///negative regulation of T-helper 17 cell lineage commitment+++GO:0006355///regulation of transcription, DNA-templated+++GO:0010628///positive regulation of gene expression+++GO:0009615///response to virus+++GO:0045580///regulation of T cell differentiation+++GO:0048304///positive regulation of isotype switching to IgG …
301012	Col7a1	24	26	126	13	14	25	21	18	1.27953	4.8337e-12	9.66993e-11	04974///Protein digestion and absorption	GO:0005615///extracellular space+++GO:0005575///cellular_component+++GO:0031012///extracellular matrix+++GO:0005581///collagen trimer	GO:0003674///molecular_function	GO:0008150///biological_process+++GO:0003429///growth plate cartilage chondrocyte morphogenesis
316153	Sult1c2a	0	2.41	0	0	1	0	0	0	1.27173	0.437383	0.631345		GO:0005764///lysosome+++GO:0005737///cytoplasm+++GO:0005829///cytosol	GO:0008146///sulfotransferase activity+++GO:0004062///aryl sulfotransferase activity+++GO:0016740///transferase activity
315870	Tbx18	144	182	369	245	57	74	165	95	1.26819	7.12646e-53	7.3364e-51		GO:0005634///nucleus+++GO:0005575///cellular_component	GO:0003700///DNA-binding transcription factor activity+++GO:0003677///DNA binding+++GO:0003674///molecular_function	GO:0008150///biological_process+++GO:0006355///regulation of transcription, DNA-templated+++GO:0072001///renal system development
102547504	LOC102547504	4	2	3	3	0	3	1	1	1.26573	0.0842417	0.202433		GO:0022625///cytosolic large ribosomal subunit+++GO:0033291///eukaryotic 80S initiation complex+++GO:0042788///polysomal ribosome+++GO:0005925///focal adhesion+++GO:0014069///postsynaptic density+++GO:0005829///cytosol	GO:0003735///structural constituent of ribosome+++GO:0003723///RNA binding	GO:0006417///regulation of translation+++GO:0006614///SRP-dependent cotranslational protein targeting to membrane+++GO:0034463///90S preribosome assembly+++GO:0006413///translational initiation+++GO:0042474///middle ear morphogenesis+++GO:0001501///skeletal system development+++GO:0002181///cytoplasmic translation+++GO:0007605///sensory perception of sound+++GO:0022618///ribonucleoprotein complex…
94168	Spp2	7	3	1	1	1	2	1	1	1.26573	0.0842417	0.202433		GO:0032991///protein-containing complex+++GO:0005576///extracellular region		GO:0046849///bone remodeling+++GO:0065003///protein-containing complex assembly
689519	LOC689519	4.3	5	5.15	3.06	0	2.21	5.1	0	1.26293	0.0373382	0.107062	04391///Hippo signaling pathway - fly+++04392///Hippo signaling pathway - multiple species+++04011///MAPK signaling pathway - yeast+++04390///Hippo signaling pathway	GO:0032993///protein-DNA complex+++GO:0005737///cytoplasm+++GO:0005654///nucleoplasm+++GO:0005667///transcription factor complex+++GO:0005634///nucleus	GO:0043565///sequence-specific DNA binding+++GO:0000978///RNA polymerase II proximal promoter sequence-specific DNA binding+++GO:0001077///proximal promoter DNA-binding transcription activator activity, RNA polymerase II-specific+++GO:0001085///RNA polymerase II transcription factor binding+++GO:0003677///DNA binding+++GO:0003700///DNA-binding transcription factor activity	GO:0001708///cell fate specification+++GO:0001830///trophectodermal cell fate commitment+++GO:0048568///embryonic organ development+++GO:0045165///cell fate commitment+++GO:0001825///blastocyst formation+++GO:0035329///hippo signaling+++GO:1902459///positive regulation of stem cell population maintenance+++GO:0007566///embryo implantation+++GO:0045944///positive regulation of transcription by RNA…
103691744	LOC103691744	9.04	25.31	16.71	7.94	9.11	9.94	0	5.91	1.24379	0.000159089	0.00100961	01230///Biosynthesis of amino acids+++00450///Selenocompound metabolism+++01130///Biosynthesis of antibiotics+++01100///Metabolic pathways+++00270///Cysteine and methionine metabolism+++00260///Glycine, serine and threonine metabolism	GO:0005829///cytosol+++GO:0005737///cytoplasm	GO:0030170///pyridoxal phosphate binding+++GO:0016829///lyase activity+++GO:0003824///catalytic activity	GO:0030308///negative regulation of cell growth+++GO:0071266///'de novo' L-methionine biosynthetic process+++GO:0043123///positive regulation of I-kappaB kinase/NF-kappaB signaling+++GO:0006749///glutathione metabolic process+++GO:0051092///positive regulation of NF-kappaB transcription factor activity+++GO:0070814///hydrogen sulfide biosynthetic process+++GO:0018272///protein-pyridoxal-5-phospha…
103690230	LOC103690230	2	0	5.03	5.49	3.25	0	1.04	1.03	1.23743	0.0831584	0.200399		GO:0005634///nucleus+++GO:0005737///cytoplasm+++GO:0031588///nucleotide-activated protein kinase complex	GO:0004679///AMP-activated protein kinase activity+++GO:0005524///ATP binding+++GO:0035174///histone serine kinase activity	GO:0042149///cellular response to glucose starvation+++GO:0035404///histone-serine phosphorylation+++GO:0032007///negative regulation of TOR signaling+++GO:0035556///intracellular signal transduction
689346	LOC689346	1	0	1.35	0	1	0	0	0	1.23535	0.453455	0.644914		GO:0005634///nucleus+++GO:0005829///cytosol+++GO:0070062///extracellular exosome+++GO:0022625///cytosolic large ribosomal subunit+++GO:0005925///focal adhesion	GO:0003723///RNA binding+++GO:0003735///structural constituent of ribosome+++GO:0046872///metal ion binding	GO:0000184///nuclear-transcribed mRNA catabolic process, nonsense-mediated decay+++GO:0006413///translational initiation+++GO:0006614///SRP-dependent cotranslational protein targeting to membrane+++GO:0006412///translation
192107	Prss8	3.11	6.23	3.09	2.09	0	3.11	2.06	1.04	1.22807	0.0636242	0.163415		GO:0019897///extrinsic component of plasma membrane+++GO:0016021///integral component of membrane+++GO:0005576///extracellular region+++GO:0005615///extracellular space+++GO:0046658///anchored component of plasma membrane+++GO:0005886///plasma membrane+++GO:0016020///membrane	GO:0017080///sodium channel regulator activity+++GO:0008236///serine-type peptidase activity+++GO:0016787///hydrolase activity+++GO:0008233///peptidase activity+++GO:0004252///serine-type endopeptidase activity	GO:0042493///response to drug+++GO:0010765///positive regulation of sodium ion transport+++GO:0051385///response to mineralocorticoid+++GO:1902307///positive regulation of sodium ion transmembrane transport+++GO:0043434///response to peptide hormone+++GO:0006508///proteolysis
108348553	LOC108348553	7	7.75	4	9.79	3.01	3	1.51	4.7	1.22643	0.0093855	0.0351656		GO:0005615///extracellular space+++GO:0005737///cytoplasm	GO:0004867///serine-type endopeptidase inhibitor activity	GO:0042176///regulation of protein catabolic process
246758	Allc	1	2	3	1	1	2	0	0	1.22509	0.198659	0.373786	01100///Metabolic pathways+++01120///Microbial metabolism in diverse environments+++00230///Purine metabolism		GO:0004037///allantoicase activity+++GO:0016787///hydrolase activity	GO:0000256///allantoin catabolic process
292165	Wdr63	1	1	0	5	0	1	2	0	1.22509	0.198659	0.373786		GO:0030286///dynein complex	GO:0045503///dynein light chain binding+++GO:0045504///dynein heavy chain binding+++GO:0008574///ATP-dependent microtubule motor activity, plus-end-directed	GO:0007018///microtubule-based movement
294562	Pou5f1	2	8	3	1	2	1	1	2	1.22509	0.0690942	0.173923	04550///Signaling pathways regulating pluripotency of stem cells	GO:0044798///nuclear transcription factor complex+++GO:0017053///transcriptional repressor complex+++GO:0005730///nucleolus+++GO:0005654///nucleoplasm+++GO:0005667///transcription factor complex+++GO:0005737///cytoplasm+++GO:0005634///nucleus+++GO:0000790///nuclear chromatin	GO:0000978///RNA polymerase II proximal promoter sequence-specific DNA binding+++GO:0003682///chromatin binding+++GO:0070974///POU domain binding+++GO:0001228///DNA-binding transcription activator activity, RNA polymerase II-specific+++GO:0001162///RNA polymerase II intronic transcription regulatory region sequence-specific DNA binding+++GO:0071837///HMG box domain binding+++GO:0043565///sequence…	GO:0006366///transcription by RNA polymerase II+++GO:0010033///response to organic substance+++GO:0001824///blastocyst development+++GO:0034097///response to cytokine+++GO:0048863///stem cell differentiation+++GO:0045596///negative regulation of cell differentiation+++GO:0045165///cell fate commitment+++GO:0001712///ectodermal cell fate commitment+++GO:1990830///cellular response to leukemia inhi…
301075	Topaz1	2	3	2	0	2	0	1	0	1.22509	0.198659	0.373786		GO:0005829///cytosol+++GO:0005737///cytoplasm		GO:0007283///spermatogenesis+++GO:0048137///spermatocyte division+++GO:0030154///cell differentiation+++GO:1901995///positive regulation of meiotic cell cycle phase transition+++GO:0098781///ncRNA transcription+++GO:0006915///apoptotic process+++GO:0007286///spermatid development
315190	Upk3a	6	5	0	3	0	0	0	6	1.22509	0.0690942	0.173923		GO:0120001///apical plasma membrane urothelial plaque+++GO:0016324///apical plasma membrane+++GO:0016020///membrane+++GO:0016021///integral component of membrane		GO:0000902///cell morphogenesis+++GO:0055078///sodium ion homeostasis+++GO:0055075///potassium ion homeostasis+++GO:0030855///epithelial cell differentiation+++GO:0006833///water transport+++GO:0001822///kidney development+++GO:0015840///urea transport+++GO:0060157///urinary bladder development
365226	Ovol3	5	2	6	1	2	0	1	3	1.22509	0.0690942	0.173923		GO:0005634///nucleus	GO:0043565///sequence-specific DNA binding+++GO:0001227///DNA-binding transcription repressor activity, RNA polymerase II-specific+++GO:0003676///nucleic acid binding+++GO:0001228///DNA-binding transcription activator activity, RNA polymerase II-specific	GO:0045944///positive regulation of transcription by RNA polymerase II+++GO:0045892///negative regulation of transcription, DNA-templated+++GO:0000122///negative regulation of transcription by RNA polymerase II
365362	Abca14	3	2	1	1	0	2	1	0	1.22509	0.198659	0.373786	02010///ABC transporters	GO:0043231///intracellular membrane-bounded organelle+++GO:0016020///membrane+++GO:0016021///integral component of membrane	GO:0016887///ATPase activity+++GO:0005524///ATP binding+++GO:0005319///lipid transporter activity+++GO:0000166///nucleotide binding+++GO:0042626///ATPase activity, coupled to transmembrane movement of substances	GO:0055085///transmembrane transport+++GO:0006869///lipid transport
499278	Fam24a	1	2	1	3	3	0	0	0	1.22509	0.198659	0.373786		GO:0005576///extracellular region
361938	Intu	6.68	3.69	9.85	7.86	5.47	1.11	0	5.46	1.2244	0.0100734	0.0372811		GO:0042995///cell projection+++GO:0005575///cellular_component+++GO:0031514///motile cilium+++GO:0009986///cell surface+++GO:0036064///ciliary basal body+++GO:0005856///cytoskeleton+++GO:0005737///cytoplasm	GO:0003674///molecular_function	GO:0030278///regulation of ossification+++GO:0021915///neural tube development+++GO:0008150///biological_process+++GO:0021513///spinal cord dorsal/ventral patterning+++GO:0060271///cilium assembly+++GO:0008589///regulation of smoothened signaling pathway+++GO:0010839///negative regulation of keratinocyte proliferation+++GO:0060173///limb development+++GO:0030030///cell projection organization+++G…
102553715	LOC102553715	0	55.96	55.96	74.61	0	24.2	18.65	37.3	1.22133	3.61137e-11	6.55659e-10		GO:0031012///extracellular matrix+++GO:0005576///extracellular region+++GO:0071953///elastic fiber+++GO:0005615///extracellular space+++GO:0001527///microfibril		GO:0007155///cell adhesion+++GO:0071493///cellular response to UV-B+++GO:0009650///UV protection+++GO:0010712///regulation of collagen metabolic process+++GO:0097435///supramolecular fiber organization+++GO:0048251///elastic fiber assembly
100910018	LOC100910018	0	0	4.98	0	1.22	0.92	0	0	1.22123	0.279484	0.472967		GO:0005737///cytoplasm+++GO:0005634///nucleus	GO:0003676///nucleic acid binding+++GO:0003723///RNA binding	GO:0000398///mRNA splicing, via spliceosome
310738	Ngf	18	10	46	40	2	6	18	23	1.22087	2.30156e-07	2.53959e-06	04151///PI3K-Akt signaling pathway+++04210///Apoptosis+++04010///MAPK signaling pathway+++04750///Inflammatory mediator regulation of TRP channels+++04722///Neurotrophin signaling pathway+++04015///Rap1 signaling pathway+++04060///Cytokine-cytokine receptor interaction+++04014///Ras signaling pathway	GO:0005615///extracellular space+++GO:0008021///synaptic vesicle+++GO:0005796///Golgi lumen+++GO:0005576///extracellular region+++GO:0031410///cytoplasmic vesicle+++GO:0030424///axon+++GO:0030425///dendrite+++GO:0005788///endoplasmic reticulum lumen	GO:0004857///enzyme inhibitor activity+++GO:0005163///nerve growth factor receptor binding+++GO:0030414///peptidase inhibitor activity+++GO:0003674///molecular_function+++GO:0005102///signaling receptor binding+++GO:0008083///growth factor activity+++GO:0008191///metalloendopeptidase inhibitor activity	GO:0035094///response to nicotine+++GO:0031954///positive regulation of protein autophosphorylation+++GO:0008284///positive regulation of cell proliferation+++GO:0050804///modulation of chemical synaptic transmission+++GO:0032496///response to lipopolysaccharide+++GO:0009314///response to radiation+++GO:0070374///positive regulation of ERK1 and ERK2 cascade+++GO:0032092///positive regulation of p…
691194	Mrgprb3	4.02	10.47	18	5	2.02	5.03	6.04	3.03	1.22035	0.00302082	0.0135368		GO:0016020///membrane+++GO:0016021///integral component of membrane	GO:0004930///G protein-coupled receptor activity	GO:0007165///signal transduction+++GO:0007186///G protein-coupled receptor signaling pathway
24695	Pthlh	23	8	29	12	5	8	9	9	1.21842	4.04831e-05	0.000293938	04928///Parathyroid hormone synthesis, secretion and action	GO:0005575///cellular_component+++GO:0005737///cytoplasm+++GO:0005576///extracellular region+++GO:0005634///nucleus	GO:0051428///peptide hormone receptor binding+++GO:0005179///hormone activity	GO:0030282///bone mineralization+++GO:0007189///adenylate cyclase-activating G protein-coupled receptor signaling pathway+++GO:0002076///osteoblast development+++GO:0010469///regulation of signaling receptor activity
685125	LOC685125	0	0	1.41	1.04	0	1.06	0	0	1.21141	0.451007	0.642777
311120	RGD1565767	2	2.08	0	2.2	2.72	0	0	0	1.20985	0.228002	0.412414		GO:0005840///ribosome+++GO:0022625///cytosolic large ribosomal subunit	GO:0003723///RNA binding+++GO:0003735///structural constituent of ribosome	GO:0002181///cytoplasmic translation+++GO:0006412///translation
108352192	LOC108352192	1	0	2	0	1	0	0	0.3	1.20914	0.404942	0.602039		GO:0016021///integral component of membrane+++GO:0005886///plasma membrane	GO:0016503///pheromone receptor activity	GO:0045925///positive regulation of female receptivity+++GO:0019236///response to pheromone
102550375	LOC102550375	2.01	3.04	3.01	8.06	0	4	2	1	1.20612	0.0540158	0.143477
103690398	NEWGENE_1565505	8	3	8	4	3	3	4	0	1.20433	0.0215205	0.0694382		GO:0005634///nucleus	GO:0001077///proximal promoter DNA-binding transcription activator activity, RNA polymerase II-specific+++GO:0000978///RNA polymerase II proximal promoter sequence-specific DNA binding+++GO:0046872///metal ion binding+++GO:0003677///DNA binding+++GO:0003700///DNA-binding transcription factor activity+++GO:0001078///proximal promoter DNA-binding transcription repressor activity, RNA polymerase II-…	GO:0000122///negative regulation of transcription by RNA polymerase II+++GO:0045944///positive regulation of transcription by RNA polymerase II+++GO:0006366///transcription by RNA polymerase II
108349753	LOC108349753	3	7	5	8	5	3	1	1	1.20433	0.0215205	0.0694382
100911964	LOC100911964	1.3	0	0	1.16	0	0	1.07	0	1.20374	0.452358	0.644124		GO:0000775///chromosome, centromeric region+++GO:0005721///pericentric heterochromatin+++GO:0005634///nucleus	GO:0003682///chromatin binding+++GO:0005524///ATP binding+++GO:0004386///helicase activity	GO:0007275///multicellular organism development+++GO:1990830///cellular response to leukemia inhibitory factor+++GO:0051301///cell division+++GO:0010216///maintenance of DNA methylation+++GO:0006351///transcription, DNA-templated+++GO:0006346///methylation-dependent chromatin silencing+++GO:0001655///urogenital system development+++GO:0006342///chromatin silencing+++GO:0007049///cell cycle+++GO:0…
690171	LOC690171	4.26	3.06	1.87	1.69	1.82	2.25	0	0.68	1.19837	0.115296	0.254469		GO:0000228///nuclear chromosome+++GO:0000788///nuclear nucleosome+++GO:0000786///nucleosome+++GO:0000784///nuclear chromosome, telomeric region+++GO:0001740///Barr body+++GO:0005634///nucleus+++GO:0005654///nucleoplasm+++GO:0032991///protein-containing complex	GO:0000979///RNA polymerase II core promoter sequence-specific DNA binding+++GO:0046982///protein heterodimerization activity+++GO:0000980///RNA polymerase II distal enhancer sequence-specific DNA binding+++GO:0031492///nucleosomal DNA binding	GO:0035264///multicellular organism growth+++GO:0007566///embryo implantation+++GO:0001649///osteoblast differentiation+++GO:0042692///muscle cell differentiation+++GO:0048477///oogenesis+++GO:0006997///nucleus organization+++GO:0090230///regulation of centromere complex assembly+++GO:0007338///single fertilization+++GO:0031508///pericentric heterochromatin assembly+++GO:0031509///telomeric heter…
103690344	LOC103690344	0	0	0	2.31	0	1.01	0	0	1.19623	0.468687	0.659339		GO:0005634///nucleus	GO:0000981///DNA-binding transcription factor activity, RNA polymerase II-specific+++GO:0046872///metal ion binding+++GO:0003677///DNA binding	GO:0006355///regulation of transcription, DNA-templated+++GO:0006351///transcription, DNA-templated
311013	Arsj	8	6	19	8	2	3	7	6	1.19032	0.00235947	0.0109147		GO:0005576///extracellular region	GO:0003824///catalytic activity+++GO:0008484///sulfuric ester hydrolase activity	GO:0008152///metabolic process
246075	Prlhr	8.31	12.16	4.58	1	2.55	1.04	4.64	3.21	1.18989	0.0153877	0.0529942	04080///Neuroactive ligand-receptor interaction	GO:0016020///membrane+++GO:0016021///integral component of membrane+++GO:0005886///plasma membrane	GO:0004983///neuropeptide Y receptor activity+++GO:0017046///peptide hormone binding+++GO:0004930///G protein-coupled receptor activity	GO:0007631///feeding behavior+++GO:0007186///G protein-coupled receptor signaling pathway+++GO:0042445///hormone metabolic process+++GO:0007218///neuropeptide signaling pathway+++GO:0007165///signal transduction
688900	Slfn1	24.03	16.73	20	12.38	11.5	7.11	7.34	6.21	1.18809	5.00629e-05	0.00035603			GO:0005524///ATP binding
50669	Prf1	6	6	6	7	2	1	5	3	1.18712	0.0178172	0.0596463	04210///Apoptosis+++04650///Natural killer cell mediated cytotoxicity	GO:0031904///endosome lumen+++GO:0005829///cytosol+++GO:0005576///extracellular region+++GO:0044194///cytolytic granule+++GO:0016020///membrane+++GO:0005886///plasma membrane+++GO:0031410///cytoplasmic vesicle+++GO:0016021///integral component of membrane+++GO:0005615///extracellular space+++GO:0005768///endosome	GO:0003674///molecular_function+++GO:0042802///identical protein binding+++GO:0005509///calcium ion binding+++GO:0046872///metal ion binding+++GO:0022829///wide pore channel activity	GO:0051607///defense response to virus+++GO:0007623///circadian rhythm+++GO:0006915///apoptotic process+++GO:0051712///positive regulation of killing of cells of other organism+++GO:0051260///protein homooligomerization+++GO:0002418///immune response to tumor cell+++GO:0019835///cytolysis+++GO:0045471///response to ethanol+++GO:0001913///T cell mediated cytotoxicity+++GO:0002357///defense respons…
114122	Vcan	157	467	1107	239	139	224	342	162	1.18679	3.59997e-98	6.72171e-96	04514///Cell adhesion molecules (CAMs)	GO:0005576///extracellular region+++GO:0031012///extracellular matrix+++GO:0009986///cell surface+++GO:0062023///collagen-containing extracellular matrix+++GO:0045202///synapse	GO:0005509///calcium ion binding+++GO:0030246///carbohydrate binding+++GO:0005540///hyaluronic acid binding+++GO:0030169///low-density lipoprotein particle binding	GO:0007417///central nervous system development+++GO:0009611///response to wounding+++GO:0031103///axon regeneration+++GO:0007155///cell adhesion
102555951	LOC102555951	0	0	18.57	9.8	0	0.24	0	12.26	1.18513	0.0117125	0.0421672	04520///Adherens junction+++04810///Regulation of actin cytoskeleton	GO:0005886///plasma membrane+++GO:0060076///excitatory synapse+++GO:0001726///ruffle+++GO:0044306///neuron projection terminus+++GO:0098685///Schaffer collateral - CA1 synapse+++GO:0061846///dendritic spine cytoplasm+++GO:0061845///neuron projection branch point+++GO:0043197///dendritic spine+++GO:0030175///filopodium+++GO:0005829///cytosol+++GO:0043198///dendritic shaft+++GO:0005794///Golgi appa…	GO:0001221///transcription cofactor binding+++GO:0070064///proline-rich region binding+++GO:0008093///cytoskeletal adaptor activity+++GO:0097110///scaffold protein binding+++GO:0042802///identical protein binding+++GO:0030165///PDZ domain binding	GO:0008286///insulin receptor signaling pathway+++GO:0061003///positive regulation of dendritic spine morphogenesis+++GO:0048167///regulation of synaptic plasticity+++GO:0008360///regulation of cell shape+++GO:0010976///positive regulation of neuron projection development+++GO:0030182///neuron differentiation+++GO:2000463///positive regulation of excitatory postsynaptic potential+++GO:0009617///r…
60584	Lif	7	5	22	9	7	5	5	2	1.18103	0.00196971	0.00933393	04550///Signaling pathways regulating pluripotency of stem cells+++04668///TNF signaling pathway+++04060///Cytokine-cytokine receptor interaction+++04630///Jak-STAT signaling pathway	GO:0005576///extracellular region+++GO:0005615///extracellular space+++GO:0005829///cytosol	GO:0005102///signaling receptor binding+++GO:0005146///leukemia inhibitory factor receptor binding+++GO:0005125///cytokine activity+++GO:0008083///growth factor activity	GO:0060426///lung vasculature development+++GO:0033138///positive regulation of peptidyl-serine phosphorylation+++GO:0008285///negative regulation of cell proliferation+++GO:0048711///positive regulation of astrocyte differentiation+++GO:0042531///positive regulation of tyrosine phosphorylation of STAT protein+++GO:0072108///positive regulation of mesenchymal to epithelial transition involved in …
362443	Klrb1a	7	4	3	3.38	2	0	1	4.7	1.17719	0.0497132	0.134392		GO:0016021///integral component of membrane+++GO:0016020///membrane	GO:0030246///carbohydrate binding
103690099	LOC103690099	0	4.14	5.38	7.4	0	0	0	7.5	1.17646	0.0529508	0.141042	03050///Proteasome	GO:0005634///nucleus+++GO:0005737///cytoplasm+++GO:1990111///spermatoproteasome complex+++GO:0019774///proteasome core complex, beta-subunit complex+++GO:0005839///proteasome core complex	GO:0004298///threonine-type endopeptidase activity	GO:0051603///proteolysis involved in cellular protein catabolic process+++GO:0045444///fat cell differentiation+++GO:0019882///antigen processing and presentation+++GO:0052548///regulation of endopeptidase activity
25660	Cd28	17	20	29.07	30.98	9	9.03	9.01	16	1.17574	3.60814e-06	3.23679e-05	04660///T cell receptor signaling pathway+++04514///Cell adhesion molecules (CAMs)+++04672///Intestinal immune network for IgA production	GO:0005886///plasma membrane+++GO:0045121///membrane raft+++GO:0001772///immunological synapse+++GO:0016021///integral component of membrane+++GO:0016020///membrane+++GO:0009986///cell surface+++GO:0009897///external side of plasma membrane+++GO:0098636///protein complex involved in cell adhesion	GO:0019901///protein kinase binding+++GO:0042803///protein homodimerization activity+++GO:0002020///protease binding+++GO:0005070///SH3/SH2 adaptor activity+++GO:0015026///coreceptor activity	GO:0010629///negative regulation of gene expression+++GO:0050852///T cell receptor signaling pathway+++GO:0045944///positive regulation of transcription by RNA polymerase II+++GO:0097190///apoptotic signaling pathway+++GO:0042129///regulation of T cell proliferation+++GO:0042110///T cell activation+++GO:0006955///immune response+++GO:0045086///positive regulation of interleukin-2 biosynthetic pro…
25656	Guca2a	4	2	1	2	0	1	2	1	1.17262	0.159188	0.320497		GO:0005576///extracellular region	GO:0030250///guanylate cyclase activator activity+++GO:0030249///guanylate cyclase regulator activity	GO:0031282///regulation of guanylate cyclase activity+++GO:0031284///positive regulation of guanylate cyclase activity
501738	Cd300lb	0	4	4	1	0	0	3	1	1.17262	0.159188	0.320497		GO:0016020///membrane+++GO:0016021///integral component of membrane		GO:0002446///neutrophil mediated immunity+++GO:0071222///cellular response to lipopolysaccharide+++GO:0033005///positive regulation of mast cell activation
25583	Cryba1	2	3	4	5	3.26	3	0	0	1.16389	0.0809142	0.196407		GO:0005634///nucleus+++GO:0005737///cytoplasm	GO:0005212///structural constituent of eye lens+++GO:0003674///molecular_function	GO:0051898///negative regulation of protein kinase B signaling+++GO:0014067///negative regulation of phosphatidylinositol 3-kinase signaling+++GO:2000210///positive regulation of anoikis+++GO:0032007///negative regulation of TOR signaling+++GO:0002088///lens development in camera-type eye+++GO:0070373///negative regulation of ERK1 and ERK2 cascade+++GO:0007601///visual perception+++GO:0001818///n…
25661	Fn1	2436	5396	18430	4833	2076	4806	4275	2753	1.16325	0	0	04151///PI3K-Akt signaling pathway+++04510///Focal adhesion+++04810///Regulation of actin cytoskeleton+++04512///ECM-receptor interaction	GO:0005577///fibrinogen complex+++GO:0031012///extracellular matrix+++GO:0070062///extracellular exosome+++GO:0016324///apical plasma membrane+++GO:0005793///endoplasmic reticulum-Golgi intermediate compartment+++GO:0005576///extracellular region+++GO:0062023///collagen-containing extracellular matrix+++GO:0005615///extracellular space+++GO:0005604///basement membrane	GO:0045340///mercury ion binding+++GO:0097718///disordered domain specific binding+++GO:0005201///extracellular matrix structural constituent+++GO:0002020///protease binding+++GO:0005515///protein binding+++GO:0005178///integrin binding+++GO:0016504///peptidase activator activity+++GO:0051087///chaperone binding+++GO:0043394///proteoglycan binding+++GO:0042802///identical protein binding+++GO:000…	GO:0071773///cellular response to BMP stimulus+++GO:1904646///cellular response to amyloid-beta+++GO:0018149///peptide cross-linking+++GO:0001932///regulation of protein phosphorylation+++GO:0010039///response to iron ion+++GO:0001503///ossification+++GO:0035924///cellular response to vascular endothelial growth factor stimulus+++GO:0007160///cell-matrix adhesion+++GO:0007155///cell adhesion+++GO…
287813	Igsf7	23.41	26.86	71.57	31.49	13.14	6.5	28.41	20.58	1.16242	7.90582e-09	1.08088e-07		GO:0016021///integral component of membrane+++GO:0005886///plasma membrane		GO:0002376///immune system process+++GO:0050715///positive regulation of cytokine secretion
100912132	LOC100912132	0	4.33	0	0	1.94	0	0	0	1.161	0.332665	0.528715		GO:0022625///cytosolic large ribosomal subunit	GO:0003735///structural constituent of ribosome+++GO:0045182///translation regulator activity	GO:0006417///regulation of translation+++GO:1990403///embryonic brain development+++GO:0006412///translation
292793	Sbsn	31	112	253	63	38	78	61	30	1.15156	3.79329e-23	1.5983e-21		GO:0005737///cytoplasm+++GO:0005576///extracellular region
29220	Thbs4	1071	1624	3045	1435	486	772	1587	391	1.15146	0	0	04510///Focal adhesion+++04512///ECM-receptor interaction+++04151///PI3K-Akt signaling pathway+++04145///Phagosome	GO:0005576///extracellular region+++GO:0005604///basement membrane+++GO:0031594///neuromuscular junction+++GO:0031012///extracellular matrix+++GO:0062023///collagen-containing extracellular matrix+++GO:0005615///extracellular space+++GO:0016529///sarcoplasmic reticulum+++GO:0005783///endoplasmic reticulum	GO:0005509///calcium ion binding+++GO:0008083///growth factor activity+++GO:0005178///integrin binding+++GO:0043237///laminin-1 binding+++GO:0008201///heparin binding+++GO:0005518///collagen binding+++GO:0001968///fibronectin binding	GO:0006986///response to unfolded protein+++GO:0007399///nervous system development+++GO:0007155///cell adhesion+++GO:0048812///neuron projection morphogenesis+++GO:0051781///positive regulation of cell division+++GO:0010469///regulation of signaling receptor activity+++GO:0001938///positive regulation of endothelial cell proliferation+++GO:0048266///behavioral response to pain+++GO:0051260///pro…
293779	Glyat	7.04	4.05	6.88	8.05	2.99	2.01	1.76	5.02	1.14597	0.018765	0.0622394	00360///Phenylalanine metabolism	GO:0005739///mitochondrion	GO:0016740///transferase activity+++GO:0047961///glycine N-acyltransferase activity+++GO:0016746///transferase activity, transferring acyl groups+++GO:0047962///glycine N-benzoyltransferase activity	GO:1901787///benzoyl-CoA metabolic process+++GO:0009636///response to toxic substance+++GO:0032787///monocarboxylic acid metabolic process+++GO:0006544///glycine metabolic process
353253	Kir3dl1	0	1	0	1.27	0	0.03	0	1	1.14274	0.488569	0.676171	04612///Antigen processing and presentation	GO:0005886///plasma membrane+++GO:0016020///membrane+++GO:0016021///integral component of membrane
140944	Slc28a3	1	2	2	6	1	2	1	1	1.1402	0.128039	0.274744		GO:0016020///membrane+++GO:0016021///integral component of membrane+++GO:0005887///integral component of plasma membrane	GO:0015390///purine-specific nucleoside:sodium symporter activity+++GO:0005415///nucleoside:sodium symporter activity+++GO:0005337///nucleoside transmembrane transporter activity+++GO:0015389///pyrimidine- and adenine-specific:sodium symporter activity	GO:1901642///nucleoside transmembrane transport+++GO:0015855///pyrimidine nucleobase transport+++GO:1904823///purine nucleobase transmembrane transport+++GO:0001895///retina homeostasis+++GO:0072531///pyrimidine-containing compound transmembrane transport+++GO:0015864///pyrimidine nucleoside transport+++GO:0015860///purine nucleoside transmembrane transport+++GO:0035725///sodium ion transmembrane…
25047	Fcer1a	1	3	6	1	3	2	0	0	1.1402	0.128039	0.274744	04071///Sphingolipid signaling pathway+++04664///Fc epsilon RI signaling pathway+++04072///Phospholipase D signaling pathway	GO:0016020///membrane+++GO:0005886///plasma membrane+++GO:0005576///extracellular region+++GO:0016021///integral component of membrane	GO:0019863///IgE binding+++GO:0019768///high-affinity IgE receptor activity	GO:0038095///Fc-epsilon receptor signaling pathway+++GO:0006955///immune response
29391	Tsx	2	5	2	2	0	2	2	1	1.1402	0.128039	0.274744
300846	Tinag	2	4	4	1	1	4	0	0	1.1402	0.128039	0.274744		GO:0005604///basement membrane+++GO:0005615///extracellular space	GO:0008234///cysteine-type peptidase activity+++GO:0005044///scavenger receptor activity+++GO:0030247///polysaccharide binding	GO:0007155///cell adhesion+++GO:0006508///proteolysis+++GO:0006898///receptor-mediated endocytosis+++GO:0006955///immune response
690479	Bpifb5	51	100	93	79	2	52	89	4	1.13841	1.77387e-16	5.18149e-15			GO:0008289///lipid binding
298478	Olr869	1.5	3.87	1	1.31	1	1	0.5	1	1.13644	0.204697	0.381677	04740///Olfactory transduction	GO:0016020///membrane+++GO:0005886///plasma membrane+++GO:0016021///integral component of membrane	GO:0004984///olfactory receptor activity+++GO:0004930///G protein-coupled receptor activity	GO:0007186///G protein-coupled receptor signaling pathway+++GO:0007165///signal transduction+++GO:0007608///sensory perception of smell+++GO:0050911///detection of chemical stimulus involved in sensory perception of smell+++GO:0050896///response to stimulus
360707	RGD1310935	1	2.45	0	1.93	1.62	0	0	0.84	1.13164	0.290097	0.485235		GO:0016020///membrane+++GO:0016021///integral component of membrane
100911660	LOC100911660	30.32	38.47	26.38	31.84	20.35	13.52	10.64	13.77	1.12656	3.02957e-07	3.28203e-06		GO:0005575///cellular_component	GO:0005524///ATP binding+++GO:0003674///molecular_function	GO:0008150///biological_process
103690044	LOC103690044	0	1.23	1.33	0	1.18	0	0	0	1.12005	0.469229	0.659713	00983///Drug metabolism - other enzymes+++00980///Metabolism of xenobiotics by cytochrome P450+++00982///Drug metabolism - cytochrome P450+++00480///Glutathione metabolism	GO:0005737///cytoplasm	GO:0016491///oxidoreductase activity+++GO:0050610///methylarsonate reductase activity+++GO:0004364///glutathione transferase activity+++GO:0045174///glutathione dehydrogenase (ascorbate) activity	GO:0009407///toxin catabolic process+++GO:0006749///glutathione metabolic process+++GO:0006805///xenobiotic metabolic process+++GO:0071243///cellular response to arsenic-containing substance+++GO:0019852///L-ascorbic acid metabolic process+++GO:0055114///oxidation-reduction process
286912	Krt20	4	3	3	3	3	0	3	0	1.11817	0.103376	0.234366	04915///Estrogen signaling pathway	GO:0005829///cytosol+++GO:0005737///cytoplasm+++GO:0005882///intermediate filament	GO:0005198///structural molecule activity	GO:0050708///regulation of protein secretion+++GO:0045109///intermediate filament organization+++GO:0009267///cellular response to starvation+++GO:0006915///apoptotic process
304918	Zbtb37	5	10	7	17	4	0	8	6	1.11817	0.00478743	0.0199817		GO:0005634///nucleus	GO:0003676///nucleic acid binding	GO:0006351///transcription, DNA-templated
685440	Nek5	5	2	5	1	2	0	3	1	1.11817	0.103376	0.234366			GO:0004672///protein kinase activity+++GO:0005524///ATP binding	GO:0006468///protein phosphorylation
690948	LOC690948	6.78	4.36	38.31	0	16.99	0	5.86	0	1.11647	0.0015106	0.00740143	04380///Osteoclast differentiation	GO:0005886///plasma membrane+++GO:0016021///integral component of membrane
103690125	NEWGENE_1590969	2.42	3	2	3.34	0	1	1	3	1.10837	0.141219	0.294419		GO:0005737///cytoplasm+++GO:0032421///stereocilium bundle+++GO:0016021///integral component of membrane+++GO:0001750///photoreceptor outer segment+++GO:0005615///extracellular space+++GO:0005887///integral component of plasma membrane+++GO:0045202///synapse+++GO:0005886///plasma membrane+++GO:0032420///stereocilium	GO:0005509///calcium ion binding+++GO:0047485///protein N-terminus binding+++GO:0044877///protein-containing complex binding	GO:0035264///multicellular organism growth+++GO:0048839///inner ear development+++GO:0050957///equilibrioception+++GO:1905515///non-motile cilium assembly+++GO:0007015///actin filament organization+++GO:0007267///cell-cell signaling+++GO:0002009///morphogenesis of an epithelium+++GO:0050953///sensory perception of light stimulus+++GO:0060088///auditory receptor cell stereocilium organization+++GO…
683163	Tnfsf8	2	6	5	2	3	2	1	1	1.10223	0.0837487	0.201515	04060///Cytokine-cytokine receptor interaction	GO:0016021///integral component of membrane+++GO:0016020///membrane	GO:0005164///tumor necrosis factor receptor binding	GO:0043374///CD8-positive, alpha-beta T cell differentiation+++GO:0006955///immune response+++GO:0050830///defense response to Gram-positive bacterium+++GO:0045944///positive regulation of transcription by RNA polymerase II
685157	LOC685157	24.59	38.59	36.18	23.32	36.56	0	1.43	19.29	1.10149	7.69522e-07	7.78722e-06		GO:0016020///membrane+++GO:0016021///integral component of membrane	GO:0042288///MHC class I protein binding	GO:0007169///transmembrane receptor protein tyrosine kinase signaling pathway
108348270	LOC108348270	0	3.63	1.53	4	2.25	2.04	0	0	1.09706	0.178217	0.346979	00980///Metabolism of xenobiotics by cytochrome P450+++00053///Ascorbate and aldarate metabolism+++00982///Drug metabolism - cytochrome P450+++00983///Drug metabolism - other enzymes+++01100///Metabolic pathways+++00830///Retinol metabolism+++00860///Porphyrin and chlorophyll metabolism+++00040///Pentose and glucuronate interconversions+++01110///Biosynthesis of secondary metabolites+++00140///St…	GO:0016021///integral component of membrane+++GO:0043231///intracellular membrane-bounded organelle+++GO:0005789///endoplasmic reticulum membrane+++GO:0005783///endoplasmic reticulum+++GO:0016020///membrane	GO:0042803///protein homodimerization activity+++GO:0005496///steroid binding+++GO:0005080///protein kinase C binding+++GO:0008144///drug binding+++GO:0046982///protein heterodimerization activity+++GO:0004857///enzyme inhibitor activity+++GO:0015020///glucuronosyltransferase activity+++GO:0005504///fatty acid binding+++GO:0019899///enzyme binding	GO:0052697///xenobiotic glucuronidation+++GO:0052696///flavonoid glucuronidation
100910180	LOC100910180	0	0.32	0	0	0	0	0.15	0	1.0958	0.80151	0.89835		GO:0022625///cytosolic large ribosomal subunit	GO:0003735///structural constituent of ribosome	GO:0006412///translation
362445	Clec2d2	13.85	6.18	4.18	9.6	6.49	1.01	1	7.36	1.09475	0.00982183	0.0365274		GO:0016021///integral component of membrane+++GO:0005886///plasma membrane+++GO:0016020///membrane	GO:0030246///carbohydrate binding
308099	Fndc1	209	433	1298	294	147	287	393	225	1.08919	5.10987e-97	9.35745e-95		GO:0016607///nuclear speck+++GO:0005737///cytoplasm+++GO:0005576///extracellular region+++GO:0005911///cell-cell junction+++GO:0031966///mitochondrial membrane+++GO:0005886///plasma membrane		GO:0051223///regulation of protein transport+++GO:0001934///positive regulation of protein phosphorylation+++GO:0010666///positive regulation of cardiac muscle cell apoptotic process+++GO:0071456///cellular response to hypoxia
25542	Ccl3	7	6.67	7	9	1	1	4	8	1.08627	0.016235	0.0552627	04062///Chemokine signaling pathway+++04060///Cytokine-cytokine receptor interaction+++04620///Toll-like receptor signaling pathway	GO:0005737///cytoplasm+++GO:0005829///cytosol+++GO:0005615///extracellular space+++GO:0005622///intracellular+++GO:0005576///extracellular region	GO:0048020///CCR chemokine receptor binding+++GO:0016004///phospholipase activator activity+++GO:0016301///kinase activity+++GO:0005125///cytokine activity+++GO:0008201///heparin binding+++GO:0004698///calcium-dependent protein kinase C activity+++GO:0008009///chemokine activity+++GO:0004672///protein kinase activity+++GO:0042056///chemoattractant activity	GO:0006954///inflammatory response+++GO:0006955///immune response+++GO:0051930///regulation of sensory perception of pain+++GO:0007010///cytoskeleton organization+++GO:0050729///positive regulation of inflammatory response+++GO:0070374///positive regulation of ERK1 and ERK2 cascade+++GO:0006816///calcium ion transport+++GO:0048247///lymphocyte chemotaxis+++GO:0070098///chemokine-mediated signalin…
25694	Has2	53	91	111	50	28	34	46	36	1.08543	1.34389e-14	3.46338e-13		GO:0005737///cytoplasm+++GO:0016021///integral component of membrane+++GO:0005887///integral component of plasma membrane+++GO:0005575///cellular_component+++GO:0016020///membrane	GO:0003674///molecular_function+++GO:0016757///transferase activity, transferring glycosyl groups+++GO:0042802///identical protein binding+++GO:0050501///hyaluronan synthase activity+++GO:0016740///transferase activity	GO:0071498///cellular response to fluid shear stress+++GO:1901201///regulation of extracellular matrix assembly+++GO:0036120///cellular response to platelet-derived growth factor stimulus+++GO:0060349///bone morphogenesis+++GO:1900026///positive regulation of substrate adhesion-dependent cell spreading+++GO:0036302///atrioventricular canal development+++GO:0045226///extracellular polysaccharide b…
25627	Cma1	9	25	78	19	12	21	22	7	1.08192	4.80102e-07	5.01566e-06	04614///Renin-angiotensin system	GO:0005576///extracellular region+++GO:0030141///secretory granule+++GO:0005615///extracellular space+++GO:0005737///cytoplasm	GO:0004252///serine-type endopeptidase activity+++GO:0008233///peptidase activity+++GO:0016787///hydrolase activity+++GO:0008236///serine-type peptidase activity+++GO:0042277///peptide binding	GO:0006508///proteolysis+++GO:0022617///extracellular matrix disassembly+++GO:0050720///interleukin-1 beta biosynthetic process+++GO:0045766///positive regulation of angiogenesis+++GO:0034769///basement membrane disassembly+++GO:0071333///cellular response to glucose stimulus+++GO:0030901///midbrain development+++GO:0006518///peptide metabolic process
108352430	C12H7orf61	4.41	4.41	4.41	10	0	4.41	4.41	2.21	1.07725	0.0346492	0.100932
103690078	LOC103690078	0.86	0	0	2.34	0	1.07	0	0.45	1.07669	0.433215	0.627659		GO:0016461///unconventional myosin complex+++GO:0031941///filamentous actin+++GO:0030018///Z disc+++GO:0005634///nucleus	GO:0003774///motor activity+++GO:0005524///ATP binding+++GO:0003779///actin binding	GO:0001701///in utero embryonic development+++GO:0001570///vasculogenesis+++GO:0048739///cardiac muscle fiber development
310926	LOC310926	134.3	118.83	1126.07	107.75	183.2	288.86	142.05	92.61	1.07584	6.01279e-64	7.63424e-62
366545	Atp6v1e2	3	7	5	6	3	1	3	3	1.07308	0.0452676	0.125117	04721///Synaptic vesicle cycle+++04966///Collecting duct acid secretion+++01100///Metabolic pathways+++00190///Oxidative phosphorylation+++04150///mTOR signaling pathway+++04145///Phagosome	GO:0033178///proton-transporting two-sector ATPase complex, catalytic domain+++GO:0001669///acrosomal vesicle	GO:0046961///proton-transporting ATPase activity, rotational mechanism+++GO:0008553///proton-exporting ATPase activity, phosphorylative mechanism	GO:0015991///ATP hydrolysis coupled proton transport
501183	Rbm44	5	6	3	7	2	3	2	3	1.07308	0.0452676	0.125117		GO:0045171///intercellular bridge+++GO:0005737///cytoplasm	GO:0042803///protein homodimerization activity+++GO:0003723///RNA binding+++GO:0003676///nucleic acid binding
405968	Olr1105	8	6	12	18	0	5	7	9	1.06981	0.0038413	0.0165815	04740///Olfactory transduction	GO:0016021///integral component of membrane+++GO:0005886///plasma membrane+++GO:0016020///membrane	GO:0004984///olfactory receptor activity+++GO:0004930///G protein-coupled receptor activity	GO:0007165///signal transduction+++GO:0007186///G protein-coupled receptor signaling pathway+++GO:0050896///response to stimulus+++GO:0050911///detection of chemical stimulus involved in sensory perception of smell+++GO:0007608///sensory perception of smell
108351574	LOC108351574	3.19	5.5	19.74	9.21	4.64	0	4.13	9.22	1.06776	0.00759274	0.0294149			GO:0004190///aspartic-type endopeptidase activity+++GO:0004170///dUTP diphosphatase activity
102552860	LOC102552860	14.2	5.05	17.79	15.58	11.33	7.31	6.51	0	1.06775	0.00159694	0.00777051			GO:0003964///RNA-directed DNA polymerase activity+++GO:0004519///endonuclease activity	GO:0015074///DNA integration
292777	Tbcb	43.6	30.91	12.5	43.34	6.21	31.25	18.69	6.19	1.06685	6.88389e-07	7.0184e-06		GO:0005737///cytoplasm+++GO:0005829///cytosol+++GO:0005874///microtubule		GO:0030154///cell differentiation+++GO:0007399///nervous system development
362262	Emilin3	10	19	22	20	8	6	14	6	1.06498	0.000253425	0.00154102		GO:0005737///cytoplasm+++GO:0031012///extracellular matrix		GO:0010811///positive regulation of cell-substrate adhesion
25292	Apoc1	0	0	2.85	5.5	0	3.5	0.5	0	1.06447	0.209755	0.388145	04979///Cholesterol metabolism	GO:0034361///very-low-density lipoprotein particle+++GO:0034364///high-density lipoprotein particle+++GO:0005576///extracellular region	GO:0003674///molecular_function	GO:0006869///lipid transport+++GO:0042157///lipoprotein metabolic process+++GO:0032368///regulation of lipid transport
363071	Stra6	60	61	256	126	36	33	77	95	1.06422	2.18451e-22	8.88974e-21		GO:0016020///membrane+++GO:0016021///integral component of membrane+++GO:0032991///protein-containing complex+++GO:0005887///integral component of plasma membrane+++GO:0005886///plasma membrane	GO:0038023///signaling receptor activity+++GO:0019841///retinol binding+++GO:0034632///retinol transmembrane transporter activity+++GO:0016918///retinal binding	GO:0060325///face morphogenesis+++GO:0048546///digestive tract morphogenesis+++GO:0048566///embryonic digestive tract development+++GO:0061038///uterus morphogenesis+++GO:0060426///lung vasculature development+++GO:0007631///feeding behavior+++GO:0003184///pulmonary valve morphogenesis+++GO:0060322///head development+++GO:0043010///camera-type eye development+++GO:0003281///ventricular septum dev…
314467	Rd3l	8	7	3	7	4	1	5	2	1.06159	0.0303539	0.0909231
367264	Stat4	14	17	8	13	6	6	4	9	1.05928	0.00182394	0.00873885	04217///Necroptosis+++04658///Th1 and Th2 cell differentiation+++04630///Jak-STAT signaling pathway	GO:0005737///cytoplasm+++GO:0005634///nucleus	GO:0003677///DNA binding+++GO:0003700///DNA-binding transcription factor activity+++GO:0043565///sequence-specific DNA binding	GO:0019221///cytokine-mediated signaling pathway+++GO:0006355///regulation of transcription, DNA-templated+++GO:0007165///signal transduction+++GO:0008150///biological_process+++GO:0045944///positive regulation of transcription by RNA polymerase II
311783	Il36rn	2.17	1.99	6	1.08	2	0	1	2.41	1.05763	0.14774	0.3032	04060///Cytokine-cytokine receptor interaction	GO:0005615///extracellular space+++GO:0005576///extracellular region	GO:0005152///interleukin-1 receptor antagonist activity+++GO:0005125///cytokine activity+++GO:0005149///interleukin-1 receptor binding	GO:0010469///regulation of signaling receptor activity+++GO:1902714///negative regulation of interferon-gamma secretion+++GO:0032755///positive regulation of interleukin-6 production+++GO:0001960///negative regulation of cytokine-mediated signaling pathway+++GO:0032715///negative regulation of interleukin-6 production+++GO:0030593///neutrophil chemotaxis+++GO:0046330///positive regulation of JNK …
309775	Nepn	18	19	8	9	10	5	8	3	1.05714	0.00151575	0.00742285		GO:0005615///extracellular space+++GO:0005614///interstitial matrix+++GO:0031012///extracellular matrix		GO:0030512///negative regulation of transforming growth factor beta receptor signaling pathway+++GO:0030198///extracellular matrix organization+++GO:0000122///negative regulation of transcription by RNA polymerase II
681124	Dnase1l2	6.81	5.72	3.07	1.8	3.32	2.08	1.34	1.65	1.05504	0.0722644	0.180141		GO:0005576///extracellular region+++GO:0005737///cytoplasm+++GO:0005634///nucleus	GO:0004536///deoxyribonuclease activity+++GO:0004519///endonuclease activity+++GO:0046872///metal ion binding	GO:0006308///DNA catabolic process+++GO:0001942///hair follicle development+++GO:0003335///corneocyte development
679564	Lypd6	8	8	6	7	3	6	3	2	1.05332	0.0204816	0.0668046		GO:0031225///anchored component of membrane+++GO:0005886///plasma membrane+++GO:0045202///synapse+++GO:0005737///cytoplasm+++GO:0016020///membrane+++GO:0030054///cell junction+++GO:0005576///extracellular region+++GO:0043005///neuron projection+++GO:0045121///membrane raft	GO:0030550///acetylcholine receptor inhibitor activity+++GO:0030548///acetylcholine receptor regulator activity	GO:2000272///negative regulation of signaling receptor activity+++GO:0099601///regulation of neurotransmitter receptor activity
497856	Rmi2	5	9	11	8	3	5	4	4	1.04709	0.01389	0.0485296	03460///Fanconi anemia pathway	GO:0005829///cytosol+++GO:0016607///nuclear speck	GO:0003677///DNA binding	GO:0006281///DNA repair+++GO:0033045///regulation of sister chromatid segregation+++GO:2000042///negative regulation of double-strand break repair via homologous recombination
266771	Vom1r90	9.99	6.57	5.09	3.55	3.93	1.82	2.7	3.79	1.04451	0.0319162	0.0947388		GO:0016020///membrane+++GO:0016021///integral component of membrane+++GO:0005886///plasma membrane	GO:0016503///pheromone receptor activity+++GO:0004930///G protein-coupled receptor activity	GO:0019236///response to pheromone+++GO:0007186///G protein-coupled receptor signaling pathway+++GO:0007165///signal transduction
501028	RGD1560917	7.04	7.1	5.33	8.79	9.84	0.91	0	2.98	1.04412	0.0231293	0.0734285		GO:0005762///mitochondrial large ribosomal subunit	GO:0003735///structural constituent of ribosome	GO:0006412///translation
102547294	Iqcn	15	17	34	16	10	11	9	10	1.03832	0.000117484	0.000768897	04380///Osteoclast differentiation+++04010///MAPK signaling pathway+++04657///IL-17 signaling pathway+++04928///Parathyroid hormone synthesis, secretion and action	GO:0005667///transcription factor complex+++GO:0035976///transcription factor AP-1 complex+++GO:0000790///nuclear chromatin+++GO:0032993///protein-DNA complex+++GO:0032991///protein-containing complex+++GO:0005634///nucleus	GO:0000978///RNA polymerase II proximal promoter sequence-specific DNA binding+++GO:0019899///enzyme binding+++GO:0000981///DNA-binding transcription factor activity, RNA polymerase II-specific+++GO:0003690///double-stranded DNA binding+++GO:0003700///DNA-binding transcription factor activity+++GO:0016922///nuclear receptor binding+++GO:0008134///transcription factor binding+++GO:0044212///transc…	GO:0051726///regulation of cell cycle+++GO:0002076///osteoblast development+++GO:0045669///positive regulation of osteoblast differentiation+++GO:0000122///negative regulation of transcription by RNA polymerase II+++GO:0014070///response to organic cyclic compound+++GO:0051591///response to cAMP+++GO:0007623///circadian rhythm+++GO:0009612///response to mechanical stimulus+++GO:0009416///response…
25253	Dpp4	161	201	573	173	69	110	225	137	1.03695	2.09792e-45	1.77578e-43	04974///Protein digestion and absorption	GO:0045121///membrane raft+++GO:0030054///cell junction+++GO:0005576///extracellular region+++GO:0016020///membrane+++GO:0030139///endocytic vesicle+++GO:0030027///lamellipodium+++GO:0005783///endoplasmic reticulum+++GO:0031258///lamellipodium membrane+++GO:0016324///apical plasma membrane+++GO:0005886///plasma membrane+++GO:0071438///invadopodium membrane+++GO:0009986///cell surface+++GO:0005794…	GO:0042277///peptide binding+++GO:0042803///protein homodimerization activity+++GO:0005518///collagen binding+++GO:0004252///serine-type endopeptidase activity+++GO:0008233///peptidase activity+++GO:0016787///hydrolase activity+++GO:0005102///signaling receptor binding+++GO:0008239///dipeptidyl-peptidase activity+++GO:0008236///serine-type peptidase activity+++GO:0002020///protease binding+++GO:0…	GO:0043542///endothelial cell migration+++GO:0051234///establishment of localization+++GO:0006508///proteolysis+++GO:0031295///T cell costimulation+++GO:0008284///positive regulation of cell proliferation+++GO:0002709///regulation of T cell mediated immunity+++GO:0007155///cell adhesion+++GO:0010716///negative regulation of extracellular matrix disassembly
287131	Ccdc154	2	6	10	5.14	3	2.26	2	4.04	1.03676	0.0410149	0.115398		GO:0005769///early endosome
84007	C3ar1	59.4	73	137.15	66.07	21.4	26.97	42.59	73.04	1.03583	7.46969e-15	1.95144e-13	04080///Neuroactive ligand-receptor interaction+++04610///Complement and coagulation cascades	GO:0016021///integral component of membrane+++GO:0016020///membrane+++GO:0005886///plasma membrane+++GO:0005623///cell	GO:0001850///complement component C3a binding+++GO:0004876///complement component C3a receptor activity+++GO:0004930///G protein-coupled receptor activity+++GO:0004875///complement receptor activity	GO:0008217///regulation of blood pressure+++GO:0007204///positive regulation of cytosolic calcium ion concentration+++GO:0010759///positive regulation of macrophage chemotaxis+++GO:0048661///positive regulation of smooth muscle cell proliferation+++GO:0010575///positive regulation of vascular endothelial growth factor production+++GO:0006954///inflammatory response+++GO:0051482///positive regulat…
689757	LOC689757	3	2	6.55	2	0	1	2.67	2.96	1.03391	0.118734	0.260188		GO:0005886///plasma membrane+++GO:0016021///integral component of membrane+++GO:0016020///membrane	GO:0030246///carbohydrate binding
500224	Lbx2	0.41	1.41	3.71	0	0	2.71	0	0	1.03168	0.319785	0.514776		GO:0005634///nucleus	GO:0003677///DNA binding	GO:0006355///regulation of transcription, DNA-templated+++GO:0006351///transcription, DNA-templated
313019	Tent5b	10	9.24	14.91	26.09	8	10.94	5.98	4.62	1.03075	0.00103358	0.00532588			GO:0016779///nucleotidyltransferase activity+++GO:0016740///transferase activity+++GO:1990817///RNA adenylyltransferase activity
103690024	LOC103690024	8.98	6.98	3.5	2.07	2.85	0.01	0	7.71	1.02907	0.0501132	0.135147	04146///Peroxisome	GO:0005777///peroxisome+++GO:0005782///peroxisomal matrix+++GO:0005739///mitochondrion+++GO:0005829///cytosol+++GO:0032991///protein-containing complex+++GO:0005778///peroxisomal membrane+++GO:0005794///Golgi apparatus+++GO:0016020///membrane	GO:0005052///peroxisome matrix targeting signal-1 binding+++GO:0008022///protein C-terminus binding	GO:0006635///fatty acid beta-oxidation+++GO:0048468///cell development+++GO:0016560///protein import into peroxisome matrix, docking+++GO:0021895///cerebral cortex neuron differentiation+++GO:0007029///endoplasmic reticulum organization+++GO:0007006///mitochondrial membrane organization+++GO:0016561///protein import into peroxisome matrix, translocation+++GO:0040018///positive regulation of multi…
108349825	LOC108349825	1.22	0	0	1.22	0	0	0	1.2	1.02654	0.510438	0.696567		GO:0005634///nucleus+++GO:0005739///mitochondrion	GO:0102571///[protein]-3-O-(N-acetyl-D-glucosaminyl)-L-serine/L-threonine O-N-acetyl-alpha-D-glucosaminase activity+++GO:0016231///beta-N-acetylglucosaminidase activity+++GO:0102166///[protein]-3-O-(N-acetyl-D-glucosaminyl)-L-threonine O-N-acetyl-alpha-D-glucosaminase activity+++GO:0004402///histone acetyltransferase activity+++GO:0102167///[protein]-3-O-(N-acetyl-D-glucosaminyl)-L-serine O-N-ace…	GO:0010524///positive regulation of calcium ion transport into cytosol+++GO:0051928///positive regulation of calcium ion transport+++GO:0006612///protein targeting to membrane+++GO:0007568///aging+++GO:0051054///positive regulation of DNA metabolic process+++GO:0046060///dATP metabolic process+++GO:0010616///negative regulation of cardiac muscle adaptation+++GO:0051901///positive regulation of mi…
306079	LOC306079	5.54	2.11	2.62	3.17	1.35	1.06	1.05	3.16	1.02432	0.123093	0.267462	03010///Ribosome	GO:0022625///cytosolic large ribosomal subunit+++GO:0005840///ribosome	GO:0003723///RNA binding+++GO:0003735///structural constituent of ribosome	GO:0006412///translation+++GO:0042273///ribosomal large subunit biogenesis
501031	RGD1560775	30.2	18.15	20.58	32.38	20.97	14.32	6.21	8.41	1.02407	2.31077e-05	0.000176317
102553500	LOC102553500	1	0	2	1.05	1	0	0	1	1.02062	0.398722	0.595955
102553456	LOC102553456	1.11	1	0	2	0	1.03	1	0	1.02035	0.395351	0.592638	04218///Cellular senescence	GO:0017053///transcriptional repressor complex		GO:0007049///cell cycle+++GO:0006351///transcription, DNA-templated
304729	Gli2	72	57	76	84	33	38	36	36	1.01775	1.14129e-12	2.44223e-11	04390///Hippo signaling pathway+++04340///Hedgehog signaling pathway	GO:0005575///cellular_component	GO:0003674///molecular_function+++GO:0003676///nucleic acid binding	GO:0030850///prostate gland development+++GO:0009612///response to mechanical stimulus
108348191	LOC108348191	0	0	2.97	2.38	0	1.51	1.14	0	1.01624	0.333789	0.529839		GO:0005802///trans-Golgi network+++GO:0005654///nucleoplasm+++GO:0016020///membrane+++GO:0005829///cytosol	GO:0042802///identical protein binding	GO:0090160///Golgi to lysosome transport+++GO:0015031///protein transport
305431	Stk32b	47	64	76	47	20	30	29	37	1.01508	1.70287e-10	2.88791e-09		GO:0005622///intracellular	GO:0004674///protein serine/threonine kinase activity+++GO:0004672///protein kinase activity+++GO:0005524///ATP binding+++GO:0016301///kinase activity+++GO:0000166///nucleotide binding	GO:0018105///peptidyl-serine phosphorylation+++GO:0016310///phosphorylation+++GO:0006468///protein phosphorylation+++GO:0035556///intracellular signal transduction
681871	LOC681871	1	4	1	2.06	2	2	0	0	1.01347	0.236553	0.423497		GO:0005886///plasma membrane+++GO:0016021///integral component of membrane	GO:0004930///G protein-coupled receptor activity
287561	Ccl7	34	36	42	79	17	13	31	34	1.01027	9.08764e-09	1.23097e-07	04657///IL-17 signaling pathway+++04062///Chemokine signaling pathway+++04060///Cytokine-cytokine receptor interaction	GO:0005576///extracellular region+++GO:0005615///extracellular space	GO:0031727///CCR2 chemokine receptor binding+++GO:0005125///cytokine activity+++GO:0031726///CCR1 chemokine receptor binding+++GO:0008009///chemokine activity+++GO:0008201///heparin binding+++GO:0048020///CCR chemokine receptor binding	GO:0070374///positive regulation of ERK1 and ERK2 cascade+++GO:0048245///eosinophil chemotaxis+++GO:0071347///cellular response to interleukin-1+++GO:0006954///inflammatory response+++GO:0071361///cellular response to ethanol+++GO:0002548///monocyte chemotaxis+++GO:0030593///neutrophil chemotaxis+++GO:0071356///cellular response to tumor necrosis factor+++GO:0070098///chemokine-mediated signaling…
103693367	LOC103693367	0	0	1.11	3.36	0	1.06	0	1.17	1.00592	0.381003	0.577999		GO:0005859///muscle myosin complex+++GO:0032982///myosin filament+++GO:0070062///extracellular exosome+++GO:0030016///myofibril	GO:0051015///actin filament binding+++GO:0000146///microfilament motor activity+++GO:0005516///calmodulin binding+++GO:0005524///ATP binding	GO:0006936///muscle contraction
100912450	LOC100912450	111.59	32.4	19.28	61.74	8.03	28.72	30.84	44.84	1.00366	5.50714e-10	8.78421e-09		GO:0005634///nucleus+++GO:0016021///integral component of membrane+++GO:0000786///nucleosome	GO:0003677///DNA binding+++GO:0046982///protein heterodimerization activity	GO:0006352///DNA-templated transcription, initiation+++GO:0006334///nucleosome assembly
100911615	LOC100911615	0	550.63	0	0	0	0	0	275.31	1.00272	3.08849e-22	1.23572e-20	01100///Metabolic pathways+++04923///Regulation of lipolysis in adipocytes+++00561///Glycerolipid metabolism+++04714///Thermogenesis	GO:0005886///plasma membrane+++GO:0005737///cytoplasm+++GO:0016021///integral component of membrane+++GO:0005811///lipid droplet+++GO:0016020///membrane	GO:0004806///triglyceride lipase activity	GO:0055088///lipid homeostasis+++GO:0019433///triglyceride catabolic process+++GO:0010898///positive regulation of triglyceride catabolic process+++GO:0010891///negative regulation of sequestering of triglyceride
100328908	Zfp831	5	1	1	5	3	1	1	1	1.00269	0.152268	0.309889		GO:0005634///nucleus	GO:0003676///nucleic acid binding	GO:0007165///signal transduction+++GO:0007275///multicellular organism development+++GO:0006366///transcription by RNA polymerase II
100359775	Bpifa6	0	1	1	0	1	0	0	0	1.00269	0.558928	0.736459			GO:0008289///lipid binding
100361314	Prr9	1	0	0	1	0	0	1	0	1.00269	0.558928	0.736459		GO:0001533///cornified envelope+++GO:0005737///cytoplasm	GO:0005198///structural molecule activity	GO:0018149///peptide cross-linking+++GO:0030216///keratinocyte differentiation
100361371	Smco2	1	0	0	1	1	0	0	0	1.00269	0.558928	0.736459		GO:0016021///integral component of membrane
100365683	Nr2e3	1	1	2	0	0	0	2	0	1.00269	0.408512	0.604985		GO:0005634///nucleus+++GO:0005667///transcription factor complex	GO:0004879///nuclear receptor activity+++GO:0043565///sequence-specific DNA binding+++GO:0046872///metal ion binding+++GO:0003677///DNA binding+++GO:0003700///DNA-binding transcription factor activity+++GO:0000978///RNA polymerase II proximal promoter sequence-specific DNA binding+++GO:0008270///zinc ion binding+++GO:0003707///steroid hormone receptor activity	GO:0045872///positive regulation of rhodopsin gene expression+++GO:0000122///negative regulation of transcription by RNA polymerase II+++GO:0045944///positive regulation of transcription by RNA polymerase II+++GO:0008285///negative regulation of cell proliferation+++GO:0006355///regulation of transcription, DNA-templated+++GO:0042462///eye photoreceptor cell development+++GO:0043401///steroid hor…
100909643	LOC100909643	1	0	0	1	0	1	0	0	1.00269	0.558928	0.736459	04650///Natural killer cell mediated cytotoxicity+++04151///PI3K-Akt signaling pathway+++04622///RIG-I-like receptor signaling pathway+++04060///Cytokine-cytokine receptor interaction+++04620///Toll-like receptor signaling pathway+++04630///Jak-STAT signaling pathway+++04621///NOD-like receptor signaling pathway+++04623///Cytosolic DNA-sensing pathway+++04217///Necroptosis	GO:0005615///extracellular space	GO:0005132///type I interferon receptor binding+++GO:0005125///cytokine activity	GO:0002323///natural killer cell activation involved in immune response+++GO:0042100///B cell proliferation+++GO:0030183///B cell differentiation+++GO:0006959///humoral immune response+++GO:0002250///adaptive immune response+++GO:0033141///positive regulation of peptidyl-serine phosphorylation of STAT protein+++GO:0043330///response to exogenous dsRNA+++GO:0019221///cytokine-mediated signaling pa…
100909960	LOC100909960	0	0	2	0	0	0	0	1	1.00269	0.558928	0.736459		GO:0005929///cilium
100911044	LOC100911044	1	3	0	0	0	0	0	2	1.00269	0.408512	0.604985		GO:0005886///plasma membrane+++GO:0016021///integral component of membrane	GO:0004930///G protein-coupled receptor activity
100911639	LOC100911639	0	1	0	1	1	0	0	0	1.00269	0.558928	0.736459
100912524	LOC100912524	0	0	0	2	0	0	0	1	1.00269	0.558928	0.736459		GO:0005634///nucleus	GO:0035064///methylated histone binding	GO:0007276///gamete generation+++GO:0006915///apoptotic process+++GO:0051726///regulation of cell cycle+++GO:0007049///cell cycle
102547412	LOC102547412	0	0	0	2	1	0	0	0	1.00269	0.558928	0.736459		GO:0005622///intracellular	GO:0046872///metal ion binding+++GO:0003676///nucleic acid binding	GO:0006355///regulation of transcription, DNA-templated
102548161	LOC102548161	3	1	3	3	1	1	1	2	1.00269	0.191268	0.364398
102551309	LOC102551309	1	0	0	1	0	0	0	1	1.00269	0.558928	0.736459
102554838	LOC102554838	0	4	2	0	0	0	0	3	1.00269	0.311408	0.506514		GO:0005737///cytoplasm+++GO:0043005///neuron projection	GO:0015631///tubulin binding	GO:0007019///microtubule depolymerization+++GO:0031110///regulation of microtubule polymerization or depolymerization+++GO:0051493///regulation of cytoskeleton organization+++GO:0031175///neuron projection development
102554931	LOC102554931	0	0	1	1	1	0	0	0	1.00269	0.558928	0.736459		GO:0030286///dynein complex+++GO:0005874///microtubule+++GO:0097228///sperm principal piece+++GO:0036157///outer dynein arm	GO:0045503///dynein light chain binding+++GO:0045505///dynein intermediate chain binding+++GO:0051959///dynein light intermediate chain binding+++GO:0005524///ATP binding+++GO:0008569///ATP-dependent microtubule motor activity, minus-end-directed	GO:0003341///cilium movement+++GO:0036158///outer dynein arm assembly
103689938	LOC103689938	1	1	2	0	0	0	1	1	1.00269	0.408512	0.604985		GO:0016020///membrane+++GO:0016021///integral component of membrane
103690003	LOC103690003	0.04	0	0.04	0	0	0	0.04	0	1.00269	0.90695	0.960297
103690116	LOC103690116	0	0	1.69	1.69	0	0	0	1.69	1.00269	0.447395	0.639639		GO:0062023///collagen-containing extracellular matrix		GO:0030500///regulation of bone mineralization
108349946	LOC108349946	0	1	1	0	1	0	0	0	1.00269	0.558928	0.736459
108349954	LOC108349954	0	2	0	0	1	0	0	0	1.00269	0.558928	0.736459		GO:0036126///sperm flagellum+++GO:0005737///cytoplasm+++GO:0097225///sperm midpiece+++GO:0001669///acrosomal vesicle		GO:0007283///spermatogenesis+++GO:0030154///cell differentiation+++GO:0010737///protein kinase A signaling
108351843	Vsig10l2	0	1	1	0	0	1	0	0	1.00269	0.558928	0.736459	04971///Gastric acid secretion+++04270///Vascular smooth muscle contraction+++04020///Calcium signaling pathway+++04371///Apelin signaling pathway+++04921///Oxytocin signaling pathway+++04510///Focal adhesion+++04022///cGMP-PKG signaling pathway+++04611///Platelet activation+++04810///Regulation of actin cytoskeleton	GO:0016021///integral component of membrane		GO:0006939///smooth muscle contraction+++GO:0030335///positive regulation of cell migration
108352945	LOC108352945	0	2	0	0	1	0	0	0	1.00269	0.558928	0.736459
117232	Barhl1	0	3	2	1	2	0	1	0	1.00269	0.311408	0.506514		GO:0005634///nucleus	GO:0001228///DNA-binding transcription activator activity, RNA polymerase II-specific+++GO:0003677///DNA binding+++GO:0000977///RNA polymerase II regulatory region sequence-specific DNA binding+++GO:0043565///sequence-specific DNA binding+++GO:0003700///DNA-binding transcription factor activity	GO:0030901///midbrain development+++GO:0045727///positive regulation of translation+++GO:0001764///neuron migration+++GO:0045165///cell fate commitment+++GO:0045664///regulation of neuron differentiation+++GO:0030182///neuron differentiation+++GO:0048513///animal organ development+++GO:0045944///positive regulation of transcription by RNA polymerase II+++GO:0001709///cell fate determination+++GO:…
117518	Ccl17	1	1	0	0	0	0	1	0	1.00269	0.558928	0.736459	04657///IL-17 signaling pathway+++04062///Chemokine signaling pathway+++04060///Cytokine-cytokine receptor interaction+++04625///C-type lectin receptor signaling pathway	GO:0005615///extracellular space+++GO:0005575///cellular_component+++GO:0005576///extracellular region	GO:0008009///chemokine activity+++GO:0031729///CCR4 chemokine receptor binding+++GO:0048020///CCR chemokine receptor binding+++GO:0005125///cytokine activity	GO:0071346///cellular response to interferon-gamma+++GO:0007186///G protein-coupled receptor signaling pathway+++GO:0071356///cellular response to tumor necrosis factor+++GO:0010469///regulation of signaling receptor activity+++GO:0071347///cellular response to interleukin-1+++GO:0006935///chemotaxis+++GO:0048247///lymphocyte chemotaxis+++GO:0008150///biological_process+++GO:0030593///neutrophil …
140936	Rcvrn	1	1	0	0	0	0	1	0	1.00269	0.558928	0.736459	04744///Phototransduction	GO:0030425///dendrite	GO:0005509///calcium ion binding	GO:0007601///visual perception+++GO:0051924///regulation of calcium ion transport+++GO:0007602///phototransduction
171028	Atp12a	0	1	0	1	0	0	0	1	1.00269	0.558928	0.736459	00190///Oxidative phosphorylation	GO:0016021///integral component of membrane+++GO:0016020///membrane+++GO:0016323///basolateral plasma membrane+++GO:0016324///apical plasma membrane	GO:0019829///cation-transporting ATPase activity+++GO:0016787///hydrolase activity+++GO:0000166///nucleotide binding+++GO:0005391///sodium:potassium-exchanging ATPase activity+++GO:0046872///metal ion binding+++GO:0008900///potassium:proton exchanging ATPase activity+++GO:0005524///ATP binding	GO:0015991///ATP hydrolysis coupled proton transport+++GO:0014070///response to organic cyclic compound+++GO:0030007///cellular potassium ion homeostasis+++GO:0099132///ATP hydrolysis coupled cation transmembrane transport+++GO:0010038///response to metal ion+++GO:0036376///sodium ion export across plasma membrane+++GO:0006883///cellular sodium ion homeostasis+++GO:0006814///sodium ion transport+…
171179	Glyatl2	1	0	0	1	0	1	0	0	1.00269	0.558928	0.736459	00360///Phenylalanine metabolism	GO:0005813///centrosome+++GO:0005739///mitochondrion+++GO:0005874///microtubule+++GO:0005856///cytoskeleton+++GO:0005737///cytoplasm+++GO:0005815///microtubule organizing center	GO:0016746///transferase activity, transferring acyl groups+++GO:0043015///gamma-tubulin binding+++GO:0016740///transferase activity+++GO:0047961///glycine N-acyltransferase activity
171496	Atp2c2	2	2	2	2	1	1	0	2	1.00269	0.242456	0.430363		GO:0031410///cytoplasmic vesicle+++GO:0005575///cellular_component+++GO:0048471///perinuclear region of cytoplasm+++GO:0016020///membrane+++GO:0000139///Golgi membrane+++GO:0009898///cytoplasmic side of plasma membrane+++GO:0016021///integral component of membrane	GO:0003674///molecular_function+++GO:0015410///manganese-transporting ATPase activity+++GO:0005388///calcium-transporting ATPase activity+++GO:0000166///nucleotide binding+++GO:0008553///proton-exporting ATPase activity, phosphorylative mechanism+++GO:0005524///ATP binding+++GO:0016787///hydrolase activity+++GO:0046872///metal ion binding	GO:0099132///ATP hydrolysis coupled cation transmembrane transport+++GO:0006816///calcium ion transport+++GO:0070588///calcium ion transmembrane transport+++GO:0008150///biological_process+++GO:1902600///proton transmembrane transport+++GO:0072659///protein localization to plasma membrane+++GO:0006811///ion transport+++GO:0090280///positive regulation of calcium ion import+++GO:0071421///manganes…
171528	Gzmb	0	1	7	0	0	2	2	0	1.00269	0.242456	0.430363	04210///Apoptosis+++04650///Natural killer cell mediated cytotoxicity	GO:0005737///cytoplasm+++GO:0030141///secretory granule+++GO:0005769///early endosome	GO:0016787///hydrolase activity+++GO:0008236///serine-type peptidase activity+++GO:0005515///protein binding+++GO:0004252///serine-type endopeptidase activity+++GO:0008233///peptidase activity	GO:0010942///positive regulation of cell death+++GO:0008626///granzyme-mediated apoptotic signaling pathway+++GO:0019835///cytolysis+++GO:0006915///apoptotic process+++GO:0006508///proteolysis+++GO:0060545///positive regulation of necroptotic process+++GO:0042267///natural killer cell mediated cytotoxicity
24217	Atp4b	1	0	0	1	0	0	0	1	1.00269	0.558928	0.736459	04966///Collecting duct acid secretion+++04971///Gastric acid secretion+++00190///Oxidative phosphorylation	GO:0005886///plasma membrane+++GO:0016021///integral component of membrane+++GO:0016020///membrane+++GO:0005890///sodium:potassium-exchanging ATPase complex+++GO:0005575///cellular_component	GO:0001671///ATPase activator activity+++GO:0008900///potassium:proton exchanging ATPase activity+++GO:0005391///sodium:potassium-exchanging ATPase activity	GO:0010248///establishment or maintenance of transmembrane electrochemical gradient+++GO:0036376///sodium ion export across plasma membrane+++GO:1902600///proton transmembrane transport+++GO:0006814///sodium ion transport+++GO:1990573///potassium ion import across plasma membrane+++GO:0010243///response to organonitrogen compound+++GO:0032781///positive regulation of ATPase activity+++GO:0030007/…
24792	Agxt	0	1	0	1	0	0	1	0	1.00269	0.558928	0.736459	00680///Methane metabolism+++00250///Alanine, aspartate and glutamate metabolism+++01120///Microbial metabolism in diverse environments+++00260///Glycine, serine and threonine metabolism+++01100///Metabolic pathways+++01200///Carbon metabolism+++01130///Biosynthesis of antibiotics+++00630///Glyoxylate and dicarboxylate metabolism+++01110///Biosynthesis of secondary metabolites+++04146///Peroxisome	GO:0005782///peroxisomal matrix+++GO:0005759///mitochondrial matrix+++GO:0043231///intracellular membrane-bounded organelle+++GO:0005777///peroxisome+++GO:0005739///mitochondrion	GO:0003824///catalytic activity+++GO:0030170///pyridoxal phosphate binding+++GO:0016597///amino acid binding+++GO:0042803///protein homodimerization activity+++GO:0005102///signaling receptor binding+++GO:0042802///identical protein binding+++GO:0008483///transaminase activity+++GO:0043621///protein self-association+++GO:0004760///serine-pyruvate transaminase activity+++GO:0008453///alanine-glyox…	GO:0019448///L-cysteine catabolic process+++GO:0051384///response to glucocorticoid+++GO:0009436///glyoxylate catabolic process+++GO:0019265///glycine biosynthetic process, by transamination of glyoxylate+++GO:0051591///response to cAMP+++GO:0042853///L-alanine catabolic process+++GO:0007219///Notch signaling pathway+++GO:0046487///glyoxylate metabolic process+++GO:0046724///oxalic acid secretion…
24903	Kng2	1	1	2	0	0	2	0	0	1.00269	0.408512	0.604985	04610///Complement and coagulation cascades	GO:0005623///cell+++GO:0072562///blood microparticle	GO:0004869///cysteine-type endopeptidase inhibitor activity	GO:0030195///negative regulation of blood coagulation+++GO:0042311///vasodilation+++GO:0006953///acute-phase response+++GO:0007204///positive regulation of cytosolic calcium ion concentration
25086	Cyp2e1	3	2	1	2	3	1	0	0	1.00269	0.242456	0.430363	01100///Metabolic pathways+++00982///Drug metabolism - cytochrome P450+++00980///Metabolism of xenobiotics by cytochrome P450+++00140///Steroid hormone biosynthesis+++00983///Drug metabolism - other enzymes+++00590///Arachidonic acid metabolism+++00591///Linoleic acid metabolism	GO:0005783///endoplasmic reticulum+++GO:0031227///intrinsic component of endoplasmic reticulum membrane+++GO:0031090///organelle membrane+++GO:0043231///intracellular membrane-bounded organelle+++GO:0016020///membrane+++GO:0005737///cytoplasm+++GO:0005789///endoplasmic reticulum membrane+++GO:0005739///mitochondrion+++GO:0000139///Golgi membrane	GO:0016712///oxidoreductase activity, acting on paired donors, with incorporation or reduction of molecular oxygen, reduced flavin or flavoprotein as one donor, and incorporation of one atom of oxygen+++GO:0016705///oxidoreductase activity, acting on paired donors, with incorporation or reduction of molecular oxygen+++GO:0016491///oxidoreductase activity+++GO:0005506///iron ion binding+++GO:00083…	GO:0008202///steroid metabolic process+++GO:0016098///monoterpenoid metabolic process+++GO:0019373///epoxygenase P450 pathway+++GO:0006805///xenobiotic metabolic process+++GO:0046483///heterocycle metabolic process+++GO:0009617///response to bacterium+++GO:0010193///response to ozone+++GO:0055114///oxidation-reduction process+++GO:0010243///response to organonitrogen compound+++GO:0017144///drug …
25206	Gucy1b2	1	1	0	0	1	0	0	0	1.00269	0.558928	0.736459	04270///Vascular smooth muscle contraction+++00230///Purine metabolism+++04921///Oxytocin signaling pathway+++04924///Renin secretion+++04970///Salivary secretion+++04713///Circadian entrainment+++04611///Platelet activation+++04730///Long-term depression+++04022///cGMP-PKG signaling pathway+++04540///Gap junction	GO:0005829///cytosol+++GO:0005737///cytoplasm	GO:0046872///metal ion binding+++GO:0004383///guanylate cyclase activity+++GO:0016849///phosphorus-oxygen lyase activity+++GO:0020037///heme binding+++GO:0005525///GTP binding+++GO:0000166///nucleotide binding+++GO:0016829///lyase activity+++GO:0043167///ion binding	GO:0009190///cyclic nucleotide biosynthetic process+++GO:0019934///cGMP-mediated signaling+++GO:0006182///cGMP biosynthetic process+++GO:0035556///intracellular signal transduction
252859	Mlnr	1	7	6	0	0	6	0	1	1.00269	0.122039	0.265779	04080///Neuroactive ligand-receptor interaction+++04020///Calcium signaling pathway	GO:0016021///integral component of membrane+++GO:0016020///membrane+++GO:0043025///neuronal cell body	GO:0004997///thyrotropin-releasing hormone receptor activity+++GO:0004930///G protein-coupled receptor activity	GO:0007165///signal transduction+++GO:0007200///phospholipase C-activating G protein-coupled receptor signaling pathway+++GO:0007186///G protein-coupled receptor signaling pathway
25483	Msx2	0	0	2	0	1	0	0	0	1.00269	0.558928	0.736459		GO:0005634///nucleus+++GO:0005575///cellular_component+++GO:0005829///cytosol+++GO:0016607///nuclear speck	GO:0003712///transcription coregulator activity+++GO:0000977///RNA polymerase II regulatory region sequence-specific DNA binding+++GO:0008134///transcription factor binding+++GO:0000978///RNA polymerase II proximal promoter sequence-specific DNA binding+++GO:0003677///DNA binding+++GO:0044212///transcription regulatory region DNA binding+++GO:0001227///DNA-binding transcription repressor activity…	GO:0090427///activation of meiosis+++GO:0061312///BMP signaling pathway involved in heart development+++GO:0043066///negative regulation of apoptotic process+++GO:0042476///odontogenesis+++GO:0061180///mammary gland epithelium development+++GO:0043065///positive regulation of apoptotic process+++GO:0008285///negative regulation of cell proliferation+++GO:0030513///positive regulation of BMP signa…
25658	Gckr	4	1	4	3	3	1	1	1	1.00269	0.152268	0.309889		GO:0005739///mitochondrion+++GO:0005654///nucleoplasm+++GO:0005634///nucleus+++GO:0005829///cytosol+++GO:0005737///cytoplasm	GO:0019904///protein domain specific binding+++GO:0097367///carbohydrate derivative binding+++GO:0016301///kinase activity+++GO:0019899///enzyme binding+++GO:0005515///protein binding+++GO:0070095///fructose-6-phosphate binding+++GO:0004857///enzyme inhibitor activity+++GO:0030246///carbohydrate binding	GO:0009750///response to fructose+++GO:0005975///carbohydrate metabolic process+++GO:1901135///carbohydrate derivative metabolic process+++GO:0006006///glucose metabolic process+++GO:0016310///phosphorylation+++GO:0034504///protein localization to nucleus+++GO:0033132///negative regulation of glucokinase activity+++GO:0001678///cellular glucose homeostasis+++GO:0051594///detection of glucose+++GO…
25726	Mc5r	5	6	9	8	2	5	5	2	1.00269	0.0287604	0.0871783	04080///Neuroactive ligand-receptor interaction	GO:0016020///membrane+++GO:0005886///plasma membrane+++GO:0016021///integral component of membrane	GO:0004977///melanocortin receptor activity+++GO:0004930///G protein-coupled receptor activity+++GO:0042562///hormone binding	GO:0007189///adenylate cyclase-activating G protein-coupled receptor signaling pathway+++GO:0007186///G protein-coupled receptor signaling pathway+++GO:0007165///signal transduction
286976	Gcnt3	0	3	1	0	1	1	0	0	1.00269	0.408512	0.604985	00512///Mucin type O-glycan biosynthesis+++01100///Metabolic pathways	GO:0005794///Golgi apparatus+++GO:0016021///integral component of membrane+++GO:0016020///membrane+++GO:0000139///Golgi membrane	GO:0016740///transferase activity+++GO:0008375///acetylglucosaminyltransferase activity+++GO:0047225///acetylgalactosaminyl-O-glycosyl-glycoprotein beta-1,6-N-acetylglucosaminyltransferase activity+++GO:0003829///beta-1,3-galactosyl-O-glycosyl-glycoprotein beta-1,6-N-acetylglucosaminyltransferase activity+++GO:0008109///N-acetyllactosaminide beta-1,6-N-acetylglucosaminyltransferase activity+++GO:…	GO:0006486///protein glycosylation+++GO:0060993///kidney morphogenesis+++GO:0002426///immunoglobulin production in mucosal tissue+++GO:0050892///intestinal absorption+++GO:0048729///tissue morphogenesis
289533	Ugt2a3	0	1	0	1	0	0	0	1	1.00269	0.558928	0.736459	00860///Porphyrin and chlorophyll metabolism+++00140///Steroid hormone biosynthesis+++00040///Pentose and glucuronate interconversions+++00980///Metabolism of xenobiotics by cytochrome P450+++01100///Metabolic pathways+++00830///Retinol metabolism+++00053///Ascorbate and aldarate metabolism+++00982///Drug metabolism - cytochrome P450+++01110///Biosynthesis of secondary metabolites+++00983///Drug …	GO:0016020///membrane+++GO:0016021///integral component of membrane	GO:0016740///transferase activity+++GO:0016757///transferase activity, transferring glycosyl groups+++GO:0016758///transferase activity, transferring hexosyl groups+++GO:0015020///glucuronosyltransferase activity	GO:0052695///cellular glucuronidation
289720	Psapl1	0	1	2	1	1	0	1	0	1.00269	0.408512	0.604985	04142///Lysosome	GO:0005829///cytosol+++GO:0005615///extracellular space+++GO:0005764///lysosome	GO:0001664///G protein-coupled receptor binding+++GO:0008047///enzyme activator activity	GO:0019216///regulation of lipid metabolic process+++GO:0060736///prostate gland growth+++GO:0060742///epithelial cell differentiation involved in prostate gland development+++GO:0006629///lipid metabolic process+++GO:0007193///adenylate cyclase-inhibiting G protein-coupled receptor signaling pathway+++GO:0006665///sphingolipid metabolic process
290055	Olr1644	0	0	1.02	1	0	0	0	1.01	1.00269	0.556969	0.736068	04740///Olfactory transduction	GO:0016021///integral component of membrane+++GO:0016020///membrane+++GO:0005886///plasma membrane	GO:0004930///G protein-coupled receptor activity+++GO:0004984///olfactory receptor activity	GO:0050896///response to stimulus+++GO:0007186///G protein-coupled receptor signaling pathway+++GO:0007608///sensory perception of smell+++GO:0050911///detection of chemical stimulus involved in sensory perception of smell+++GO:0007165///signal transduction
291754	Dsg4	0	1	2	1	0	0	1	1	1.00269	0.408512	0.604985		GO:0016021///integral component of membrane+++GO:0030054///cell junction+++GO:0030057///desmosome+++GO:0005886///plasma membrane+++GO:0016020///membrane	GO:0005509///calcium ion binding+++GO:0046872///metal ion binding	GO:0030509///BMP signaling pathway+++GO:0030216///keratinocyte differentiation+++GO:0098609///cell-cell adhesion+++GO:0007156///homophilic cell adhesion via plasma membrane adhesion molecules+++GO:0001942///hair follicle development+++GO:0007155///cell adhesion
291846	Prss54	0	0	0	2	0	1	0	0	1.00269	0.558928	0.736459		GO:0005576///extracellular region	GO:0004252///serine-type endopeptidase activity	GO:0006508///proteolysis
293197	Olr40	1	0	1	0	0	1	0	0	1.00269	0.558928	0.736459	04740///Olfactory transduction	GO:0016021///integral component of membrane+++GO:0016020///membrane+++GO:0005886///plasma membrane	GO:0004984///olfactory receptor activity+++GO:0004930///G protein-coupled receptor activity	GO:0050896///response to stimulus+++GO:0007165///signal transduction+++GO:0050911///detection of chemical stimulus involved in sensory perception of smell+++GO:0007186///G protein-coupled receptor signaling pathway+++GO:0007608///sensory perception of smell
29323	Slc6a18	0	0	0	2	0	0	0	1	1.00269	0.558928	0.736459		GO:0016021///integral component of membrane+++GO:0016020///membrane+++GO:0016324///apical plasma membrane+++GO:0031526///brush border membrane+++GO:0005886///plasma membrane+++GO:0005887///integral component of plasma membrane	GO:0015293///symporter activity+++GO:0005328///neurotransmitter:sodium symporter activity+++GO:0015175///neutral amino acid transmembrane transporter activity	GO:0006972///hyperosmotic response+++GO:0006865///amino acid transport+++GO:0003333///amino acid transmembrane transport+++GO:0006970///response to osmotic stress+++GO:0015804///neutral amino acid transport+++GO:0006836///neurotransmitter transport+++GO:0055085///transmembrane transport
293305	Olr159	0	0	2	0	0	0.5	0.5	0	1.00269	0.558928	0.736459	04740///Olfactory transduction	GO:0016021///integral component of membrane+++GO:0016020///membrane+++GO:0005886///plasma membrane	GO:0004930///G protein-coupled receptor activity+++GO:0004984///olfactory receptor activity	GO:0007186///G protein-coupled receptor signaling pathway+++GO:0007165///signal transduction+++GO:0050911///detection of chemical stimulus involved in sensory perception of smell+++GO:0050896///response to stimulus+++GO:0007608///sensory perception of smell
29646	Adh4	2	1	4	3	0	1	1	3	1.00269	0.191268	0.364398	00830///Retinol metabolism+++00071///Fatty acid degradation+++01100///Metabolic pathways+++00980///Metabolism of xenobiotics by cytochrome P450+++00010///Glycolysis / Gluconeogenesis+++00350///Tyrosine metabolism+++00982///Drug metabolism - cytochrome P450	GO:0005737///cytoplasm	GO:0051903///S-(hydroxymethyl)glutathione dehydrogenase activity+++GO:0051287///NAD binding+++GO:0016491///oxidoreductase activity+++GO:0004024///alcohol dehydrogenase activity, zinc-dependent+++GO:0035276///ethanol binding+++GO:0046872///metal ion binding+++GO:0004022///alcohol dehydrogenase (NAD) activity+++GO:0008270///zinc ion binding	GO:0007568///aging+++GO:0006069///ethanol oxidation+++GO:0042698///ovulation cycle+++GO:0055114///oxidation-reduction process
299829	RGD1559995	3	2	3	0	3	0	1	0	1.00269	0.242456	0.430363		GO:0005737///cytoplasm	GO:0003729///mRNA binding	GO:0007275///multicellular organism development+++GO:0010468///regulation of gene expression
304990	Olr1595	0	1	0	1	0	0	1	0	1.00269	0.558928	0.736459	04740///Olfactory transduction	GO:0005886///plasma membrane+++GO:0016021///integral component of membrane+++GO:0016020///membrane	GO:0004930///G protein-coupled receptor activity+++GO:0004984///olfactory receptor activity	GO:0007608///sensory perception of smell+++GO:0007165///signal transduction+++GO:0007186///G protein-coupled receptor signaling pathway+++GO:0050896///response to stimulus+++GO:0050911///detection of chemical stimulus involved in sensory perception of smell
306365	Potem	1	0	1	0	0	0	1	0	1.00269	0.558928	0.736459
308190	Cyp26c1	1	0	4	1	3	0	0	0	1.00269	0.311408	0.506514	01100///Metabolic pathways+++00830///Retinol metabolism	GO:0005575///cellular_component	GO:0003674///molecular_function+++GO:0005506///iron ion binding+++GO:0008401///retinoic acid 4-hydroxylase activity+++GO:0020037///heme binding+++GO:0016705///oxidoreductase activity, acting on paired donors, with incorporation or reduction of molecular oxygen+++GO:0046872///metal ion binding+++GO:0001972///retinoic acid binding+++GO:0016491///oxidoreductase activity+++GO:0004497///monooxygenase …	GO:0055114///oxidation-reduction process+++GO:0008150///biological_process+++GO:0034653///retinoic acid catabolic process+++GO:0014032///neural crest cell development+++GO:0048284///organelle fusion+++GO:0016125///sterol metabolic process+++GO:0009952///anterior/posterior pattern specification+++GO:0007417///central nervous system development
312316	Doxl1	27	8	11	2	8	6	7	3	1.00269	0.00419471	0.0178521		GO:0005886///plasma membrane	GO:0048038///quinone binding+++GO:0052597///diamine oxidase activity+++GO:0005507///copper ion binding+++GO:0008131///primary amine oxidase activity+++GO:0016491///oxidoreductase activity+++GO:0046872///metal ion binding	GO:0046677///response to antibiotic+++GO:0009308///amine metabolic process+++GO:0055114///oxidation-reduction process
313149	Cfap221	0	2	0	0	1	0	0	0	1.00269	0.558928	0.736459		GO:0005929///cilium	GO:0005516///calmodulin binding	GO:0003341///cilium movement+++GO:0044458///motile cilium assembly+++GO:0060271///cilium assembly
313152	Ifnk	1	0	0	1	0	0	0	1	1.00269	0.558928	0.736459	04060///Cytokine-cytokine receptor interaction+++04622///RIG-I-like receptor signaling pathway+++04630///Jak-STAT signaling pathway	GO:0005615///extracellular space+++GO:0005576///extracellular region	GO:0005132///type I interferon receptor binding+++GO:0005126///cytokine receptor binding+++GO:0005125///cytokine activity	GO:0051607///defense response to virus+++GO:0043330///response to exogenous dsRNA+++GO:0002250///adaptive immune response+++GO:0019221///cytokine-mediated signaling pathway+++GO:0006959///humoral immune response+++GO:0006952///defense response+++GO:0030183///B cell differentiation+++GO:0010469///regulation of signaling receptor activity+++GO:0042100///B cell proliferation+++GO:0002323///natural k…
313545	Tmem125	2	1	4	1	2	1	1	0	1.00269	0.242456	0.430363		GO:0005575///cellular_component+++GO:0016020///membrane+++GO:0016021///integral component of membrane	GO:0003674///molecular_function	GO:0008150///biological_process
315947	Nme9	0	0	0	2	0	0	1	0	1.00269	0.558928	0.736459		GO:0005737///cytoplasm+++GO:0005856///cytoskeleton+++GO:0005622///intracellular	GO:0004550///nucleoside diphosphate kinase activity	GO:0006183///GTP biosynthetic process+++GO:0006228///UTP biosynthetic process+++GO:0045454///cell redox homeostasis+++GO:0006241///CTP biosynthetic process
317221	Rtl3	3	8	11	10	3	6	2	5	1.00269	0.0194007	0.0638588		GO:0005634///nucleus	GO:0003676///nucleic acid binding+++GO:0008270///zinc ion binding
360486	Linc00514	0	1	1	2	2	0	0	0	1.00269	0.408512	0.604985
361412	Adamts18	7	10	6	3	6	3	1	3	1.00269	0.0350993	0.101885		GO:0005576///extracellular region	GO:0008233///peptidase activity+++GO:0008237///metallopeptidase activity+++GO:0004222///metalloendopeptidase activity	GO:0006508///proteolysis
361707	Tsga10ip	17	11	17	21	7	6	14	6	1.00269	0.000787007	0.00419848		GO:0036064///ciliary basal body+++GO:0032391///photoreceptor connecting cilium		GO:0044782///cilium organization
362604	Tlr12	10	5	4	5	2	4	5	1	1.00269	0.0429144	0.119699		GO:0005887///integral component of plasma membrane		GO:0006954///inflammatory response+++GO:0002224///toll-like receptor signaling pathway+++GO:0007165///signal transduction
363993	Gpr25	3	1	0	0	2	0	0	0	1.00269	0.408512	0.604985		GO:0016021///integral component of membrane+++GO:0016020///membrane	GO:0004930///G protein-coupled receptor activity	GO:0007165///signal transduction+++GO:0007186///G protein-coupled receptor signaling pathway
364304	Rnase1	1	0	1	0	0	0	1	0	1.00269	0.558928	0.736459		GO:0005576///extracellular region	GO:0004519///endonuclease activity+++GO:0004522///ribonuclease A activity+++GO:0016787///hydrolase activity+++GO:0003676///nucleic acid binding+++GO:0004540///ribonuclease activity+++GO:0004518///nuclease activity	GO:0090502///RNA phosphodiester bond hydrolysis, endonucleolytic+++GO:0090501///RNA phosphodiester bond hydrolysis+++GO:0090305///nucleic acid phosphodiester bond hydrolysis
364729	Nme8	0	1	0	1	0	1	0	0	1.00269	0.558928	0.736459		GO:0005623///cell+++GO:0097598///sperm cytoplasmic droplet+++GO:0035686///sperm fibrous sheath+++GO:0097228///sperm principal piece+++GO:0005737///cytoplasm+++GO:0036157///outer dynein arm	GO:0008017///microtubule binding	GO:0034614///cellular response to reactive oxygen species+++GO:0007283///spermatogenesis+++GO:0060271///cilium assembly+++GO:0007286///spermatid development+++GO:0007275///multicellular organism development+++GO:0045454///cell redox homeostasis+++GO:0030317///flagellated sperm motility+++GO:0030154///cell differentiation
364973	Best2	1	0	0	1	0	0	0	1	1.00269	0.558928	0.736459	04970///Salivary secretion	GO:0016021///integral component of membrane+++GO:0005886///plasma membrane+++GO:0016020///membrane+++GO:0034707///chloride channel complex	GO:0005254///chloride channel activity	GO:0006811///ion transport+++GO:0006821///chloride transport+++GO:1902476///chloride transmembrane transport
365564	Atoh7	1	0	1	0	0	0	1	0	1.00269	0.558928	0.736459		GO:0005575///cellular_component	GO:0003674///molecular_function+++GO:0046983///protein dimerization activity	GO:0008150///biological_process+++GO:0021554///optic nerve development+++GO:0007623///circadian rhythm+++GO:0006355///regulation of transcription, DNA-templated+++GO:0009649///entrainment of circadian clock+++GO:0003407///neural retina development
405038	Olr312	2	0	0	0	0	1	0	0	1.00269	0.558928	0.736459	04740///Olfactory transduction	GO:0005886///plasma membrane+++GO:0016021///integral component of membrane+++GO:0016020///membrane	GO:0004930///G protein-coupled receptor activity+++GO:0005549///odorant binding+++GO:0004984///olfactory receptor activity	GO:0050911///detection of chemical stimulus involved in sensory perception of smell+++GO:0007186///G protein-coupled receptor signaling pathway+++GO:0007165///signal transduction+++GO:0050896///response to stimulus+++GO:0007608///sensory perception of smell
405207	Olr837	0	3	0	5	1	3	0	0	1.00269	0.242456	0.430363	04740///Olfactory transduction	GO:0005886///plasma membrane+++GO:0016020///membrane+++GO:0016021///integral component of membrane	GO:0004930///G protein-coupled receptor activity+++GO:0004984///olfactory receptor activity	GO:0050911///detection of chemical stimulus involved in sensory perception of smell+++GO:0007186///G protein-coupled receptor signaling pathway+++GO:0007608///sensory perception of smell+++GO:0007165///signal transduction+++GO:0050896///response to stimulus
405216	Olr1104	0	1	0	1	0	1	0	0	1.00269	0.558928	0.736459	04740///Olfactory transduction	GO:0016021///integral component of membrane+++GO:0005886///plasma membrane+++GO:0016020///membrane	GO:0004984///olfactory receptor activity+++GO:0004930///G protein-coupled receptor activity	GO:0007608///sensory perception of smell+++GO:0050911///detection of chemical stimulus involved in sensory perception of smell+++GO:0007186///G protein-coupled receptor signaling pathway+++GO:0050896///response to stimulus+++GO:0007165///signal transduction
494499	Gsta5	4	2	0	0	0	0	1	2	1.00269	0.311408	0.506514	00480///Glutathione metabolism+++00982///Drug metabolism - cytochrome P450+++00980///Metabolism of xenobiotics by cytochrome P450+++00983///Drug metabolism - other enzymes	GO:0005634///nucleus+++GO:0005640///nuclear outer membrane+++GO:0005829///cytosol+++GO:0005737///cytoplasm	GO:0042803///protein homodimerization activity+++GO:0016740///transferase activity+++GO:0004364///glutathione transferase activity+++GO:0043295///glutathione binding+++GO:0008144///drug binding	GO:0042178///xenobiotic catabolic process+++GO:0007568///aging+++GO:0042493///response to drug+++GO:0031667///response to nutrient levels
497651	Rnase11	1	1	0	0	0	0	0	1	1.00269	0.558928	0.736459		GO:0005576///extracellular region	GO:0004540///ribonuclease activity+++GO:0003676///nucleic acid binding	GO:0090501///RNA phosphodiester bond hydrolysis
497970	Heatr9	0	1	0	1	0	0	0	1	1.00269	0.558928	0.736459				GO:0002244///hematopoietic progenitor cell differentiation
498275	Fcrlb	1	1	2	2	1	1	1	0	1.00269	0.311408	0.506514		GO:0005737///cytoplasm		GO:0050777///negative regulation of immune response
498943	RGD1561415	2	1	0	1	0	1	1	0	1.00269	0.408512	0.604985
499000	Zdhhc11	4	1	3	2	1	1	0	3	1.00269	0.191268	0.364398		GO:0005886///plasma membrane+++GO:0016020///membrane+++GO:0005794///Golgi apparatus+++GO:0016021///integral component of membrane+++GO:0005783///endoplasmic reticulum+++GO:0030173///integral component of Golgi membrane	GO:0016740///transferase activity+++GO:0016409///palmitoyltransferase activity+++GO:0019706///protein-cysteine S-palmitoyltransferase activity+++GO:0016746///transferase activity, transferring acyl groups+++GO:0008270///zinc ion binding	GO:0018230///peptidyl-L-cysteine S-palmitoylation+++GO:0006612///protein targeting to membrane+++GO:0018345///protein palmitoylation
499721	Clca4l	2	1	1	0	0	0	1	1	1.00269	0.408512	0.604985	04924///Renin secretion+++04972///Pancreatic secretion	GO:0005887///integral component of plasma membrane	GO:0005229///intracellular calcium activated chloride channel activity	GO:0034220///ion transmembrane transport+++GO:0006821///chloride transport
500409	Esrp1	0	1	1	0	0	1	0	0	1.00269	0.558928	0.736459		GO:0005634///nucleus+++GO:0005654///nucleoplasm+++GO:0016604///nuclear body	GO:0003723///RNA binding+++GO:0003729///mRNA binding+++GO:0003676///nucleic acid binding	GO:0006397///mRNA processing+++GO:0043484///regulation of RNA splicing+++GO:0042669///regulation of inner ear auditory receptor cell fate specification+++GO:0008380///RNA splicing
500513	RGD1562532	2	0	0	0	0	0	0	1	1.00269	0.558928	0.736459
500598	Tnfrsf18	2	0	2	6	2	1	2	0	1.00269	0.191268	0.364398	04060///Cytokine-cytokine receptor interaction	GO:0005887///integral component of plasma membrane+++GO:0016020///membrane+++GO:0016021///integral component of membrane	GO:0005031///tumor necrosis factor-activated receptor activity	GO:0033209///tumor necrosis factor-mediated signaling pathway+++GO:0043066///negative regulation of apoptotic process
501084	RGD1559960	1	0	0	1	0	1	0	0	1.00269	0.558928	0.736459		GO:0005764///lysosome	GO:0016740///transferase activity+++GO:0008146///sulfotransferase activity
57305	Uts2r	0	1	0	1	1	0	0	0	1.00269	0.558928	0.736459	04080///Neuroactive ligand-receptor interaction	GO:0005769///early endosome+++GO:0005887///integral component of plasma membrane+++GO:0055037///recycling endosome+++GO:0005886///plasma membrane+++GO:0016020///membrane+++GO:0016021///integral component of membrane	GO:0001604///urotensin II receptor activity+++GO:0008528///G protein-coupled peptide receptor activity+++GO:0004930///G protein-coupled receptor activity	GO:0045777///positive regulation of blood pressure+++GO:0007218///neuropeptide signaling pathway+++GO:0045907///positive regulation of vasoconstriction+++GO:0007165///signal transduction+++GO:0007186///G protein-coupled receptor signaling pathway+++GO:0010841///positive regulation of circadian sleep/wake cycle, wakefulness+++GO:0030307///positive regulation of cell growth+++GO:0035814///negative …
641640	Defb36	3	1	1	1	1	1	1	0	1.00269	0.311408	0.506514		GO:0005576///extracellular region		GO:0042742///defense response to bacterium+++GO:0006952///defense response+++GO:0045087///innate immune response
64621	Akp3	1	0	1	0	0	1	0	0	1.00269	0.558928	0.736459	00730///Thiamine metabolism+++00790///Folate biosynthesis+++01100///Metabolic pathways+++02020///Two-component system	GO:0009897///external side of plasma membrane	GO:0008270///zinc ion binding+++GO:0003824///catalytic activity+++GO:0016791///phosphatase activity+++GO:0016787///hydrolase activity+++GO:0000287///magnesium ion binding+++GO:0004035///alkaline phosphatase activity	GO:0006793///phosphorus metabolic process+++GO:0016311///dephosphorylation
65050	Barhl2	1	1	0	0	0	0	1	0	1.00269	0.558928	0.736459		GO:0005634///nucleus	GO:0001077///proximal promoter DNA-binding transcription activator activity, RNA polymerase II-specific+++GO:0003700///DNA-binding transcription factor activity+++GO:0001228///DNA-binding transcription activator activity, RNA polymerase II-specific+++GO:0000977///RNA polymerase II regulatory region sequence-specific DNA binding	GO:0045727///positive regulation of translation+++GO:0001709///cell fate determination+++GO:0030182///neuron differentiation+++GO:0045664///regulation of neuron differentiation+++GO:0030516///regulation of axon extension+++GO:0006357///regulation of transcription by RNA polymerase II+++GO:0001764///neuron migration+++GO:0007399///nervous system development
65132	Cldn7	1	1	0	0	0	0	0	1	1.00269	0.558928	0.736459	04530///Tight junction+++04670///Leukocyte transendothelial migration+++04514///Cell adhesion molecules (CAMs)	GO:0016328///lateral plasma membrane+++GO:0016020///membrane+++GO:0016021///integral component of membrane+++GO:0005886///plasma membrane+++GO:0005923///bicellular tight junction+++GO:0016323///basolateral plasma membrane+++GO:0030054///cell junction+++GO:0016327///apicolateral plasma membrane	GO:0005198///structural molecule activity+++GO:0042802///identical protein binding+++GO:0050839///cell adhesion molecule binding	GO:0007162///negative regulation of cell adhesion+++GO:0016338///calcium-independent cell-cell adhesion via plasma membrane cell-adhesion molecules+++GO:0008284///positive regulation of cell proliferation+++GO:0045471///response to ethanol+++GO:0032463///negative regulation of protein homooligomerization+++GO:0043066///negative regulation of apoptotic process+++GO:2000147///positive regulation of…
679834	Meig1	1	0	0	1	1	0	0	0	1.00269	0.558928	0.736459		GO:0005634///nucleus		GO:0007283///spermatogenesis+++GO:0030154///cell differentiation
680620	Pou5f2	0	2	0	0	0	0	0	1	1.00269	0.558928	0.736459		GO:0005634///nucleus	GO:0003700///DNA-binding transcription factor activity+++GO:0003677///DNA binding	GO:0006355///regulation of transcription, DNA-templated+++GO:0030154///cell differentiation+++GO:0051321///meiotic cell cycle+++GO:0007283///spermatogenesis+++GO:0007275///multicellular organism development
681290	LOC681290	6	3	4	5	0	1	3	5	1.00269	0.0795497	0.193663		GO:0016021///integral component of membrane
682006	Tmem247	1	1	0	0	0	0	0	1	1.00269	0.558928	0.736459		GO:0016021///integral component of membrane+++GO:0016020///membrane+++GO:0005783///endoplasmic reticulum
684545	Nlrp2	1	1	0	0	0	0	1	0	1.00269	0.558928	0.736459			GO:0005524///ATP binding+++GO:0000166///nucleotide binding	GO:0050718///positive regulation of interleukin-1 beta secretion
685227	Wfdc11	2	0	0	0	0	1	0	0	1.00269	0.558928	0.736459		GO:0005576///extracellular region
686140	Fam47e	0	2	2	0	0	0	1	1	1.00269	0.408512	0.604985		GO:0005737///cytoplasm
687403	Acp7	0	0	0	2	0	1	0	0	1.00269	0.558928	0.736459		GO:0005576///extracellular region	GO:0016787///hydrolase activity+++GO:0003993///acid phosphatase activity+++GO:0046872///metal ion binding	GO:0016311///dephosphorylation
687866	Myo1h	1	1	0	0	0	0	0	1	1.00269	0.558928	0.736459		GO:0016459///myosin complex	GO:0003774///motor activity+++GO:0003779///actin binding+++GO:0005524///ATP binding
688389	LOC688389	2	0	0	0	1	0	0	0	1.00269	0.558928	0.736459		GO:0016020///membrane+++GO:0016021///integral component of membrane	GO:0022857///transmembrane transporter activity+++GO:0015179///L-amino acid transmembrane transporter activity	GO:1902475///L-alpha-amino acid transmembrane transport+++GO:0055085///transmembrane transport
688750	Cd209f	2	2	0	0	0	0	2	0	1.00269	0.408512	0.604985	04145///Phagosome+++04625///C-type lectin receptor signaling pathway	GO:0016021///integral component of membrane+++GO:0016020///membrane	GO:0030246///carbohydrate binding
689437	LOC689437	0	0	0	2	0	0	0	1	1.00269	0.558928	0.736459		GO:0016021///integral component of membrane
689524	Wdr64	1	1	1	3	2	0	1	0	1.00269	0.311408	0.506514
690227	Vom2r77	0	1	0	1	0	0	0	1	1.00269	0.558928	0.736459		GO:0005886///plasma membrane+++GO:0016020///membrane+++GO:0005887///integral component of plasma membrane+++GO:0016021///integral component of membrane	GO:0004930///G protein-coupled receptor activity	GO:0007186///G protein-coupled receptor signaling pathway+++GO:0007165///signal transduction
691352	LOC691352	0	2	0	0	1	0	0	0	1.00269	0.558928	0.736459
691693	LOC691693	0.96	0	0.96	0	0	0	0.96	0	1.00269	0.566897	0.736966
691982	Tmem95	4	3	2	3	1	4	0	1	1.00269	0.152268	0.309889		GO:0016021///integral component of membrane+++GO:0016020///membrane
78974	Six3	1	0	0	1	1	0	0	0	1.00269	0.558928	0.736459		GO:0005667///transcription factor complex+++GO:0005634///nucleus	GO:0000976///transcription regulatory region sequence-specific DNA binding+++GO:0003700///DNA-binding transcription factor activity+++GO:0042826///histone deacetylase binding+++GO:0001222///transcription corepressor binding+++GO:0005102///signaling receptor binding+++GO:0003713///transcription coactivator activity+++GO:0000980///RNA polymerase II distal enhancer sequence-specific DNA binding+++GO…	GO:1902692///regulation of neuroblast proliferation+++GO:0030178///negative regulation of Wnt signaling pathway+++GO:0021537///telencephalon development+++GO:0097402///neuroblast migration+++GO:0021797///forebrain anterior/posterior pattern specification+++GO:0021536///diencephalon development+++GO:0021978///telencephalon regionalization+++GO:0002088///lens development in camera-type eye+++GO:190…
291615	Pabpc2	5	6	10.9	4	3	3	3	4	0.997134	0.0363037	0.104647	03015///mRNA surveillance pathway+++03018///RNA degradation+++03013///RNA transport	GO:0005634///nucleus+++GO:0005829///cytosol+++GO:0010494///cytoplasmic stress granule+++GO:0005737///cytoplasm+++GO:1990904///ribonucleoprotein complex	GO:0008143///poly(A) binding+++GO:0003730///mRNA 3'-UTR binding+++GO:0008266///poly(U) RNA binding+++GO:0003723///RNA binding+++GO:0003676///nucleic acid binding	GO:0006413///translational initiation+++GO:0060213///positive regulation of nuclear-transcribed mRNA poly(A) tail shortening+++GO:0048255///mRNA stabilization+++GO:0000184///nuclear-transcribed mRNA catabolic process, nonsense-mediated decay+++GO:0000398///mRNA splicing, via spliceosome+++GO:0031047///gene silencing by RNA+++GO:0043488///regulation of mRNA stability+++GO:2000623///negative regula…
503122	Cyp4f40	0	0	1.14	1.23	1.19	0	0	0	0.996619	0.526724	0.710444		GO:0005789///endoplasmic reticulum membrane+++GO:0031090///organelle membrane	GO:0020037///heme binding+++GO:0004497///monooxygenase activity+++GO:0046872///metal ion binding+++GO:0005506///iron ion binding+++GO:0016491///oxidoreductase activity+++GO:0016705///oxidoreductase activity, acting on paired donors, with incorporation or reduction of molecular oxygen	GO:0055114///oxidation-reduction process
362951	RGD1309808	14.79	5.05	7.75	15.76	3.65	3.1	9.68	5.34	0.996384	0.0067944	0.0268463		GO:0005576///extracellular region	GO:0008289///lipid binding	GO:0006869///lipid transport+++GO:0042157///lipoprotein metabolic process
103693700	LOC103693700	1.11	0	0	1.1	0	1.11	0	0	0.99618	0.541166	0.722909		GO:0022625///cytosolic large ribosomal subunit	GO:0003735///structural constituent of ribosome	GO:0006412///translation
108352309	LOC108352309	0	1	1.01	0	0	0	1.01	0	0.995534	0.560275	0.73569		GO:0071007///U2-type catalytic step 2 spliceosome+++GO:0030532///small nuclear ribonucleoprotein complex+++GO:0071013///catalytic step 2 spliceosome+++GO:0005685///U1 snRNP+++GO:0005687///U4 snRNP+++GO:0034709///methylosome+++GO:0005689///U12-type spliceosomal complex+++GO:0005732///small nucleolar ribonucleoprotein complex+++GO:0034719///SMN-Sm protein complex+++GO:0005681///spliceosomal complex…	GO:0003723///RNA binding	GO:0051170///import into nucleus+++GO:0006369///termination of RNA polymerase II transcription+++GO:0008380///RNA splicing+++GO:0000398///mRNA splicing, via spliceosome+++GO:0000387///spliceosomal snRNP assembly+++GO:0008334///histone mRNA metabolic process
25276	Sycp1	1	0	0	0.99	0	1	0	0	0.995462	0.562256	0.733637		GO:0000794///condensed nuclear chromosome+++GO:0000775///chromosome, centromeric region+++GO:0000802///transverse filament+++GO:0005634///nucleus+++GO:0000801///central element+++GO:0005694///chromosome+++GO:0000795///synaptonemal complex+++GO:0001673///male germ cell nucleus	GO:0003677///DNA binding	GO:0007129///synapsis+++GO:0000711///meiotic DNA repair synthesis+++GO:0051026///chiasma assembly+++GO:0051301///cell division+++GO:0035092///sperm chromatin condensation+++GO:0007130///synaptonemal complex assembly+++GO:0051321///meiotic cell cycle+++GO:0032880///regulation of protein localization+++GO:0007131///reciprocal meiotic recombination+++GO:0007049///cell cycle+++GO:0051878///lateral el…
108351325	LOC108351325	0	0	1.72	1.68	1.71	0	0	0	0.994232	0.449237	0.640973	00860///Porphyrin and chlorophyll metabolism+++01100///Metabolic pathways+++01110///Biosynthesis of secondary metabolites+++00970///Aminoacyl-tRNA biosynthesis+++01120///Microbial metabolism in diverse environments	GO:0097452///GAIT complex+++GO:1990904///ribonucleoprotein complex+++GO:0005829///cytosol+++GO:0017101///aminoacyl-tRNA synthetase multienzyme complex+++GO:0005737///cytoplasm+++GO:0005886///plasma membrane	GO:0005524///ATP binding+++GO:0035613///RNA stem-loop binding+++GO:0042803///protein homodimerization activity+++GO:0004818///glutamate-tRNA ligase activity+++GO:0008270///zinc ion binding+++GO:0004827///proline-tRNA ligase activity+++GO:0051020///GTPase binding+++GO:0042802///identical protein binding	GO:0006424///glutamyl-tRNA aminoacylation+++GO:0044539///long-chain fatty acid import+++GO:0071346///cellular response to interferon-gamma+++GO:0032869///cellular response to insulin stimulus+++GO:0017148///negative regulation of translation+++GO:0006433///prolyl-tRNA aminoacylation
108350933	LOC108350933	7.83	2.9	5.49	0	0.99	0	1	6.21	0.986771	0.100496	0.229462		GO:0001650///fibrillar center+++GO:0005730///nucleolus+++GO:0030687///preribosome, large subunit precursor+++GO:0005634///nucleus+++GO:0000794///condensed nuclear chromosome+++GO:0005783///endoplasmic reticulum	GO:0008097///5S rRNA binding	GO:0000447///endonucleolytic cleavage in ITS1 to separate SSU-rRNA from 5.8S rRNA and LSU-rRNA from tricistronic rRNA transcript (SSU-rRNA, 5.8S rRNA, LSU-rRNA)+++GO:0002244///hematopoietic progenitor cell differentiation+++GO:1902570///protein localization to nucleolus+++GO:0007080///mitotic metaphase plate congression+++GO:0042273///ribosomal large subunit biogenesis+++GO:0000055///ribosomal la…
499413	Hsf2bp	5.97	5	8.63	8	1	6	3	4	0.981935	0.0328596	0.0968899		GO:0005737///cytoplasm
83584	Casp6	21.23	36.97	14.02	23.62	13.37	28.38	6.96	0	0.979103	7.28715e-05	0.000499941	04210///Apoptosis	GO:0030424///axon+++GO:0043025///neuronal cell body+++GO:0005829///cytosol+++GO:0005634///nucleus+++GO:0005737///cytoplasm	GO:0008233///peptidase activity+++GO:0097200///cysteine-type endopeptidase activity involved in execution phase of apoptosis+++GO:0097153///cysteine-type endopeptidase activity involved in apoptotic process+++GO:0004197///cysteine-type endopeptidase activity+++GO:0008234///cysteine-type peptidase activity+++GO:0004175///endopeptidase activity+++GO:0016787///hydrolase activity	GO:0002525///acute inflammatory response to non-antigenic stimulus+++GO:0046670///positive regulation of retinal cell programmed cell death+++GO:0042542///response to hydrogen peroxide+++GO:0043065///positive regulation of apoptotic process+++GO:0010038///response to metal ion+++GO:0006508///proteolysis+++GO:0009408///response to heat+++GO:0032355///response to estradiol+++GO:0034097///response t…
100363268	LOC100363268	64.22	66.9	0	0	44.75	0	0	21.98	0.977174	3.61934e-06	3.24531e-05	04714///Thermogenesis+++04723///Retrograde endocannabinoid signaling+++00190///Oxidative phosphorylation+++01100///Metabolic pathways	GO:0005739///mitochondrion+++GO:0005747///mitochondrial respiratory chain complex I+++GO:0005758///mitochondrial intermembrane space		GO:0055114///oxidation-reduction process+++GO:0032981///mitochondrial respiratory chain complex I assembly
54271	Tpsab1	7	8	31	3	7	5	9	4	0.973547	0.00475855	0.0198786		GO:0005615///extracellular space+++GO:0005576///extracellular region	GO:0016787///hydrolase activity+++GO:0004252///serine-type endopeptidase activity+++GO:0008233///peptidase activity+++GO:0008236///serine-type peptidase activity	GO:0006508///proteolysis
292594	Lilrb4	46	28	55	16	17	25	7	25	0.973149	1.2072e-06	1.18146e-05	04380///Osteoclast differentiation	GO:0016020///membrane+++GO:0016021///integral component of membrane		GO:0002250///adaptive immune response
102555622	LOC102555622	0	2.33	0	0	0	0	1.19	0	0.972062	0.53869	0.720714		GO:0005634///nucleus	GO:0003677///DNA binding+++GO:0042803///protein homodimerization activity+++GO:0000978///RNA polymerase II proximal promoter sequence-specific DNA binding+++GO:0001078///proximal promoter DNA-binding transcription repressor activity, RNA polymerase II-specific+++GO:0046872///metal ion binding+++GO:0046982///protein heterodimerization activity	GO:0007507///heart development+++GO:0006351///transcription, DNA-templated+++GO:1901249///regulation of lung goblet cell differentiation+++GO:0000122///negative regulation of transcription by RNA polymerase II+++GO:0061140///lung secretory cell differentiation+++GO:1901250///negative regulation of lung goblet cell differentiation+++GO:0048617///embryonic foregut morphogenesis
25008	Lta	1	0	1.91	1	1	1	0	0	0.969862	0.426661	0.621759	04060///Cytokine-cytokine receptor interaction+++04064///NF-kappa B signaling pathway+++04668///TNF signaling pathway	GO:0016020///membrane+++GO:0005576///extracellular region+++GO:0005615///extracellular space	GO:0003674///molecular_function+++GO:0005125///cytokine activity+++GO:0005164///tumor necrosis factor receptor binding	GO:0044130///negative regulation of growth of symbiont in host+++GO:0060252///positive regulation of glial cell proliferation+++GO:0010469///regulation of signaling receptor activity+++GO:0001666///response to hypoxia+++GO:0048535///lymph node development+++GO:0032729///positive regulation of interferon-gamma production+++GO:0048147///negative regulation of fibroblast proliferation+++GO:0006959//…
171178	Adh7	8	19	12	4	0	8	4	10	0.969526	0.00840434	0.0320634	00010///Glycolysis / Gluconeogenesis+++00830///Retinol metabolism+++00071///Fatty acid degradation+++01100///Metabolic pathways+++01110///Biosynthesis of secondary metabolites+++00350///Tyrosine metabolism+++00980///Metabolism of xenobiotics by cytochrome P450+++00982///Drug metabolism - cytochrome P450	GO:0005886///plasma membrane+++GO:0005576///extracellular region+++GO:0005829///cytosol+++GO:0005737///cytoplasm	GO:0004031///aldehyde oxidase activity+++GO:0035276///ethanol binding+++GO:0048019///receptor antagonist activity+++GO:0042803///protein homodimerization activity+++GO:0004745///retinol dehydrogenase activity+++GO:0046872///metal ion binding+++GO:0008270///zinc ion binding+++GO:0016491///oxidoreductase activity+++GO:0004022///alcohol dehydrogenase (NAD) activity+++GO:0004024///alcohol dehydrogena…	GO:0055114///oxidation-reduction process+++GO:0042573///retinoic acid metabolic process+++GO:0010430///fatty acid omega-oxidation+++GO:1900116///extracellular negative regulation of signal transduction+++GO:0042572///retinol metabolic process+++GO:0006068///ethanol catabolic process+++GO:0009617///response to bacterium+++GO:0001523///retinoid metabolic process+++GO:0006067///ethanol metabolic pro…
81503	Cxcl1	9	4	1	27	5	5	8	3	0.967928	0.0101748	0.0375761	04060///Cytokine-cytokine receptor interaction+++04062///Chemokine signaling pathway+++04668///TNF signaling pathway+++04621///NOD-like receptor signaling pathway+++04657///IL-17 signaling pathway	GO:0005623///cell+++GO:0005615///extracellular space+++GO:0005576///extracellular region	GO:0005125///cytokine activity+++GO:0008009///chemokine activity+++GO:0008083///growth factor activity	GO:0001975///response to amphetamine+++GO:0071222///cellular response to lipopolysaccharide+++GO:0030595///leukocyte chemotaxis+++GO:0043268///positive regulation of potassium ion transport+++GO:0061844///antimicrobial humoral immune response mediated by antimicrobial peptide+++GO:0032355///response to estradiol+++GO:0007204///positive regulation of cytosolic calcium ion concentration+++GO:000695…
103693258	LOC103693258	0	1.11	0	1.17	0	1.17	0	0	0.965219	0.545446	0.726435	04977///Vitamin digestion and absorption+++02010///ABC transporters+++04071///Sphingolipid signaling pathway	GO:0005886///plasma membrane+++GO:0005887///integral component of plasma membrane+++GO:0016020///membrane+++GO:0016323///basolateral plasma membrane+++GO:0005737///cytoplasm	GO:0008559///xenobiotic transmembrane transporting ATPase activity+++GO:0046624///sphingolipid transporter activity+++GO:0034634///glutathione transmembrane transporter activity+++GO:0005324///long-chain fatty acid transporter activity+++GO:0015238///drug transmembrane transporter activity+++GO:0034040///lipid-transporting ATPase activity+++GO:0005524///ATP binding+++GO:0016491///oxidoreductase a…	GO:0055085///transmembrane transport+++GO:0015911///plasma membrane long-chain fatty acid transport+++GO:0030335///positive regulation of cell migration+++GO:1905701///positive regulation of drug transmembrane export+++GO:0006855///drug transmembrane transport+++GO:0046618///drug export+++GO:0060548///negative regulation of cell death+++GO:0033700///phospholipid efflux+++GO:0042908///xenobiotic t…
108351354	LOC108351354	1	3	2	1.97	1.02	2.07	0	1	0.965172	0.258331	0.447713		GO:0016021///integral component of membrane+++GO:0005886///plasma membrane	GO:0046872///metal ion binding
108348142	LOC108348142	35.82	41.55	18.66	25.02	10.6	13.08	20.69	17.91	0.961456	1.12805e-05	9.18497e-05	03010///Ribosome	GO:0014069///postsynaptic density+++GO:0005925///focal adhesion+++GO:0016020///membrane+++GO:0098794///postsynapse+++GO:0022625///cytosolic large ribosomal subunit+++GO:0042788///polysomal ribosome+++GO:0005829///cytosol	GO:0003723///RNA binding+++GO:0003735///structural constituent of ribosome+++GO:0019843///rRNA binding	GO:0000184///nuclear-transcribed mRNA catabolic process, nonsense-mediated decay+++GO:0002181///cytoplasmic translation+++GO:0006413///translational initiation+++GO:0006614///SRP-dependent cotranslational protein targeting to membrane+++GO:0006412///translation
102552889	LOC102552889	19.63	8.58	7.09	13.17	7.32	4.41	7.45	5.76	0.961324	0.0054651	0.0223402	03050///Proteasome	GO:0005829///cytosol+++GO:0031595///nuclear proteasome complex+++GO:0005576///extracellular region+++GO:0000502///proteasome complex+++GO:0070062///extracellular exosome+++GO:0022624///proteasome accessory complex+++GO:0008541///proteasome regulatory particle, lid subcomplex+++GO:0016020///membrane+++GO:0005737///cytoplasm+++GO:0034774///secretory granule lumen+++GO:0005654///nucleoplasm+++GO:000…		GO:0043312///neutrophil degranulation+++GO:0043687///post-translational protein modification+++GO:0016579///protein deubiquitination+++GO:0043161///proteasome-mediated ubiquitin-dependent protein catabolic process
103693048	LOC103693048	7.5	3.5	3.5	2.66	3	0	1.83	4.01	0.959625	0.0988106	0.226592
100910117	LOC100910117	7.98	15.83	8.66	10.04	6.29	2.85	12.83	0	0.954961	0.00966817	0.0360333		GO:0005634///nucleus	GO:0046872///metal ion binding+++GO:0000981///DNA-binding transcription factor activity, RNA polymerase II-specific+++GO:0003677///DNA binding	GO:0006351///transcription, DNA-templated
102546376	LOC102546376	16.75	14.79	5.96	9.1	5.63	6.36	9.32	2.79	0.95399	0.00679363	0.0268489
103694543	LOC103694543	0	0	3.38	1.12	0	1.14	1.19	0	0.952288	0.400971	0.59805		GO:0001650///fibrillar center	GO:0046872///metal ion binding+++GO:0032453///histone demethylase activity (H3-K4 specific)+++GO:0003677///DNA binding+++GO:0050681///androgen receptor binding+++GO:0051213///dioxygenase activity	GO:0006355///regulation of transcription, DNA-templated+++GO:0006351///transcription, DNA-templated+++GO:0060765///regulation of androgen receptor signaling pathway+++GO:0034720///histone H3-K4 demethylation+++GO:0002457///T cell antigen processing and presentation
299685	Bpifc	5.24	16.94	8.54	7.37	4.33	3.52	8.38	3.51	0.950984	0.0146568	0.0508172		GO:0005615///extracellular space	GO:0008289///lipid binding
108348094	NEWGENE_1306399	106.18	119	116.27	107	0	58.5	105.93	68	0.950844	5.57908e-17	1.70551e-15		GO:0005634///nucleus
102548194	LOC102548194	1	2	3	2	2	0	1	1.15	0.949582	0.263913	0.454203		GO:0005929///cilium+++GO:0012505///endomembrane system+++GO:0005886///plasma membrane+++GO:0036064///ciliary basal body+++GO:0005829///cytosol	GO:0005096///GTPase activator activity+++GO:0017137///Rab GTPase binding	GO:0090630///activation of GTPase activity+++GO:0043547///positive regulation of GTPase activity+++GO:1902018///negative regulation of cilium assembly+++GO:0031338///regulation of vesicle fusion+++GO:0006886///intracellular protein transport
365395	Clcf1	16	17	56	17	9	13	20	13	0.949254	4.79365e-05	0.000342699	04060///Cytokine-cytokine receptor interaction	GO:0005576///extracellular region+++GO:0097058///CRLF-CLCF1 complex+++GO:0097059///CNTFR-CLCF1 complex	GO:0005125///cytokine activity+++GO:0005102///signaling receptor binding+++GO:0005127///ciliary neurotrophic factor receptor binding+++GO:0046982///protein heterodimerization activity	GO:0008284///positive regulation of cell proliferation+++GO:0030890///positive regulation of B cell proliferation+++GO:0043524///negative regulation of neuron apoptotic process+++GO:0042531///positive regulation of tyrosine phosphorylation of STAT protein+++GO:0007166///cell surface receptor signaling pathway+++GO:0010469///regulation of signaling receptor activity
499377	Plekhs1	6.65	5.94	6.91	5.95	0	7.44	1.18	4.6	0.947637	0.0466772	0.128038
303148	Slc36a3	1.01	3.02	3.02	1.01	0	1.18	1	2.01	0.946523	0.263416	0.453677	04138///Autophagy - yeast	GO:0016021///integral component of membrane+++GO:0016020///membrane	GO:0015180///L-alanine transmembrane transporter activity+++GO:0015187///glycine transmembrane transporter activity+++GO:0015193///L-proline transmembrane transporter activity+++GO:0015171///amino acid transmembrane transporter activity+++GO:0015078///proton transmembrane transporter activity+++GO:0005280///amino acid:proton symporter activity	GO:0003333///amino acid transmembrane transport+++GO:0035524///proline transmembrane transport+++GO:1902600///proton transmembrane transport+++GO:0015816///glycine transport+++GO:0015808///L-alanine transport
100910264	LOC100910264	1.13	0	0	1.12	0	1.17	0	0	0.94611	0.554742	0.734399		GO:0005886///plasma membrane+++GO:0009897///external side of plasma membrane+++GO:0016021///integral component of membrane	GO:0038023///signaling receptor activity+++GO:0030246///carbohydrate binding	GO:0007155///cell adhesion
103690020	LOC103690020	39.34	40.03	27.17	14.42	4.7	10.63	13.44	34.21	0.944258	1.53386e-05	0.000121163	04512///ECM-receptor interaction+++04920///Adipocytokine signaling pathway+++03320///PPAR signaling pathway+++04152///AMPK signaling pathway+++04640///Hematopoietic cell lineage+++04975///Fat digestion and absorption+++04979///Cholesterol metabolism+++04145///Phagosome	GO:0016020///membrane+++GO:0016021///integral component of membrane	GO:0070053///thrombospondin receptor activity+++GO:0050431///transforming growth factor beta binding+++GO:0070538///oleic acid binding	GO:0007166///cell surface receptor signaling pathway+++GO:0006955///immune response
310550	Dchs2	15	11	8	14	10	5	3	7	0.9438	0.0064768	0.025838	04392///Hippo signaling pathway - multiple species+++04391///Hippo signaling pathway - fly	GO:0016021///integral component of membrane+++GO:0005886///plasma membrane	GO:0005509///calcium ion binding	GO:0007156///homophilic cell adhesion via plasma membrane adhesion molecules
100910669	LOC100910669	31	39.51	53.99	79.73	47.51	20.19	21.95	16.8	0.942712	2.0167e-08	2.58989e-07		GO:0016020///membrane+++GO:0016021///integral component of membrane	GO:0042288///MHC class I protein binding	GO:0007169///transmembrane receptor protein tyrosine kinase signaling pathway+++GO:0007165///signal transduction
100912416	LOC100912416	11.37	16.46	22.2	28.62	4.87	6.27	14.7	15.19	0.941461	0.000505419	0.00283109		GO:0005886///plasma membrane+++GO:0030054///cell junction	GO:0044325///ion channel binding	GO:0030335///positive regulation of cell migration+++GO:0002244///hematopoietic progenitor cell differentiation+++GO:0090314///positive regulation of protein targeting to membrane+++GO:0010360///negative regulation of anion channel activity
501568	RGD1560207	3	8	6	6	3	3	0	6	0.941293	0.0600463	0.15612
192203	Fap	57	71	147	69	26	51	66	37	0.937105	4.31434e-13	9.59891e-12		GO:0030027///lamellipodium+++GO:0009986///cell surface+++GO:0071438///invadopodium membrane+++GO:0045177///apical part of cell+++GO:0045178///basal part of cell+++GO:0005615///extracellular space+++GO:0005886///plasma membrane	GO:0002020///protease binding+++GO:0008233///peptidase activity+++GO:0008239///dipeptidyl-peptidase activity+++GO:0042803///protein homodimerization activity+++GO:0008236///serine-type peptidase activity+++GO:0005178///integrin binding+++GO:0004252///serine-type endopeptidase activity+++GO:0004175///endopeptidase activity	GO:0051603///proteolysis involved in cellular protein catabolic process+++GO:0043542///endothelial cell migration+++GO:0097325///melanocyte proliferation+++GO:0010716///negative regulation of extracellular matrix disassembly+++GO:0071850///mitotic cell cycle arrest+++GO:0071158///positive regulation of cell cycle arrest+++GO:0060244///negative regulation of cell proliferation involved in contact …
296499	Dlx2	5	8	6	2	1	4	1	5	0.935579	0.0738248	0.183036		GO:0005634///nucleus+++GO:0000790///nuclear chromatin+++GO:0005737///cytoplasm	GO:0003727///single-stranded RNA binding+++GO:0044212///transcription regulatory region DNA binding+++GO:0001228///DNA-binding transcription activator activity, RNA polymerase II-specific+++GO:0003682///chromatin binding+++GO:0000977///RNA polymerase II regulatory region sequence-specific DNA binding+++GO:0071837///HMG box domain binding+++GO:0000978///RNA polymerase II proximal promoter sequence…	GO:0006357///regulation of transcription by RNA polymerase II+++GO:0021879///forebrain neuron differentiation+++GO:0051216///cartilage development+++GO:0060349///bone morphogenesis+++GO:0008283///cell proliferation+++GO:0045746///negative regulation of Notch signaling pathway+++GO:0030154///cell differentiation+++GO:0090263///positive regulation of canonical Wnt signaling pathway+++GO:0050679///p…
498491	Tlr11	8	5	5	3	0	2	3	6	0.935579	0.0738248	0.183036		GO:0005887///integral component of plasma membrane		GO:0002224///toll-like receptor signaling pathway+++GO:0007165///signal transduction+++GO:0006954///inflammatory response
59300	Nat8f1	13.52	10.48	23.85	28.95	5.24	6.99	8.73	19.35	0.932662	0.000650114	0.00354464	00480///Glutathione metabolism	GO:0016020///membrane+++GO:0016021///integral component of membrane	GO:0008080///N-acetyltransferase activity	GO:0001702///gastrulation with mouth forming second
679594	LOC679594	0	3.33	8.21	6.63	2.99	4.03	2.53	0	0.930679	0.0978069	0.224913		GO:0005840///ribosome+++GO:0005634///nucleus	GO:0003735///structural constituent of ribosome+++GO:0046872///metal ion binding	GO:0006412///translation
498894	RGD1560813	0	8.85	0	3.9	0	6.71	0	0	0.928806	0.166205	0.33038	04217///Necroptosis	GO:0000790///nuclear chromatin+++GO:0000786///nucleosome	GO:0003677///DNA binding+++GO:0046982///protein heterodimerization activity	GO:0006342///chromatin silencing
81737	Ntf3	6	5	2	6	1	5	2	2	0.928693	0.0910396	0.213476	04010///MAPK signaling pathway+++04014///Ras signaling pathway+++04722///Neurotrophin signaling pathway+++04151///PI3K-Akt signaling pathway	GO:0016020///membrane+++GO:0030425///dendrite+++GO:0005576///extracellular region+++GO:0031410///cytoplasmic vesicle+++GO:0030424///axon+++GO:0008021///synaptic vesicle+++GO:0005615///extracellular space+++GO:0016021///integral component of membrane	GO:0042056///chemoattractant activity+++GO:0008083///growth factor activity+++GO:0048406///nerve growth factor binding+++GO:0005165///neurotrophin receptor binding+++GO:0005102///signaling receptor binding	GO:0021675///nerve development+++GO:0043524///negative regulation of neuron apoptotic process+++GO:0038180///nerve growth factor signaling pathway+++GO:0042552///myelination+++GO:0050930///induction of positive chemotaxis+++GO:0050804///modulation of chemical synaptic transmission+++GO:0048812///neuron projection morphogenesis+++GO:0050732///negative regulation of peptidyl-tyrosine phosphorylatio…
500534	Ccdc24	7.2	3.07	7.62	3.47	5.42	0	2.5	3.33	0.92768	0.0734246	0.182317	00514///Other types of O-glycan biosynthesis+++00052///Galactose metabolism+++00515///Mannose type O-glycan biosynthesis+++00601///Glycosphingolipid biosynthesis - lacto and neolacto series+++01100///Metabolic pathways+++00533///Glycosaminoglycan biosynthesis - keratan sulfate+++00510///N-Glycan biosynthesis+++00513///Various types of N-glycan biosynthesis	GO:0032580///Golgi cisterna membrane+++GO:0005654///nucleoplasm+++GO:0043231///intracellular membrane-bounded organelle+++GO:0005794///Golgi apparatus+++GO:0016021///integral component of membrane	GO:0046872///metal ion binding+++GO:0003831///beta-N-acetylglucosaminylglycopeptide beta-1,4-galactosyltransferase activity+++GO:0003945///N-acetyllactosamine synthase activity+++GO:0004461///lactose synthase activity	GO:0007626///locomotory behavior+++GO:0008542///visual learning+++GO:0007420///brain development+++GO:0007613///memory+++GO:0021680///cerebellar Purkinje cell layer development+++GO:0006486///protein glycosylation+++GO:0005975///carbohydrate metabolic process
286986	Vom2r75	1	3	0	0	1.11	1	0	0	0.92545	0.439449	0.632792		GO:0016021///integral component of membrane+++GO:0005886///plasma membrane+++GO:0016020///membrane	GO:0004930///G protein-coupled receptor activity	GO:0007186///G protein-coupled receptor signaling pathway+++GO:0007165///signal transduction
303856	Atp13a5	24	15	16	53	5	4	21	27	0.924691	5.95707e-05	0.000416645		GO:0016021///integral component of membrane+++GO:0016020///membrane+++GO:0005623///cell	GO:0000166///nucleotide binding+++GO:0016887///ATPase activity+++GO:0016787///hydrolase activity+++GO:0005524///ATP binding+++GO:0046872///metal ion binding	GO:0006812///cation transport+++GO:0006874///cellular calcium ion homeostasis
679817	Ces1a	8	10	10	8	4	3	2	10	0.924691	0.0204616	0.0667507		GO:0005615///extracellular space	GO:0004771///sterol esterase activity+++GO:0004806///triglyceride lipase activity+++GO:0052689///carboxylic ester hydrolase activity+++GO:0016787///hydrolase activity	GO:0016042///lipid catabolic process
501998	Cbln3	10.14	8.09	5.7	5.7	7.59	2.92	1	4.14	0.923589	0.0356728	0.103219		GO:0005615///extracellular space+++GO:0045202///synapse
103690038	LOC103690038	0	0	91.29	220.96	0	0	0	164.99	0.923016	9.38041e-12	1.83043e-10		GO:0005634///nucleus	GO:0003677///DNA binding+++GO:0046872///metal ion binding	GO:0006351///transcription, DNA-templated+++GO:0006355///regulation of transcription, DNA-templated
291555	Atp8b1	54.74	57.74	124.35	71.83	29.96	50.34	47.34	35.47	0.922867	1.23989e-11	2.37802e-10		GO:0016020///membrane+++GO:0005794///Golgi apparatus+++GO:0005886///plasma membrane+++GO:0016021///integral component of membrane+++GO:0031526///brush border membrane+++GO:0032420///stereocilium	GO:0016787///hydrolase activity+++GO:1901612///cardiolipin binding+++GO:0000287///magnesium ion binding+++GO:0005319///lipid transporter activity+++GO:0000166///nucleotide binding+++GO:0003674///molecular_function+++GO:0004012///phospholipid-translocating ATPase activity+++GO:0005524///ATP binding+++GO:0015247///aminophospholipid transmembrane transporter activity	GO:0021650///vestibulocochlear nerve formation+++GO:0008206///bile acid metabolic process+++GO:0015917///aminophospholipid transport+++GO:0015914///phospholipid transport+++GO:0008150///biological_process+++GO:0060119///inner ear receptor cell development+++GO:0045332///phospholipid translocation+++GO:0007605///sensory perception of sound+++GO:0007030///Golgi organization
108351613	LOC108351613	1.09	0	1.42	1.95	0	1.26	1.1	0	0.92095	0.416199	0.612038			GO:0003676///nucleic acid binding+++GO:0019863///IgE binding	GO:0016032///viral process+++GO:0015074///DNA integration
688996	Kcnk16	27	6	5	11	5	3	11	7	0.916963	0.00725154	0.0283235		GO:0016021///integral component of membrane+++GO:0016020///membrane+++GO:0005887///integral component of plasma membrane	GO:0022841///potassium ion leak channel activity+++GO:0005267///potassium channel activity	GO:0006811///ion transport+++GO:0071805///potassium ion transmembrane transport+++GO:0006813///potassium ion transport
24237	C6	43	36	223	22	34	36	58	44	0.916279	5.19556e-12	1.03721e-10	04610///Complement and coagulation cascades	GO:0005576///extracellular region+++GO:0005579///membrane attack complex+++GO:0005615///extracellular space	GO:0003674///molecular_function	GO:0043065///positive regulation of apoptotic process+++GO:0019835///cytolysis+++GO:0045087///innate immune response+++GO:0006956///complement activation+++GO:0006958///complement activation, classical pathway+++GO:0002376///immune system process+++GO:0006955///immune response
25194	Gnrh1	9	7	11	5	3	0	7	7	0.91523	0.0302798	0.0907584	04912///GnRH signaling pathway	GO:0043204///perikaryon+++GO:0005576///extracellular region+++GO:0043679///axon terminus+++GO:0043005///neuron projection+++GO:0005798///Golgi-associated vesicle+++GO:0005739///mitochondrion+++GO:1990008///neurosecretory vesicle+++GO:0005615///extracellular space+++GO:0098556///cytoplasmic side of rough endoplasmic reticulum membrane+++GO:0030425///dendrite	GO:0005183///gonadotropin hormone-releasing hormone activity+++GO:0031530///gonadotropin-releasing hormone receptor binding+++GO:0005179///hormone activity	GO:0045471///response to ethanol+++GO:0010469///regulation of signaling receptor activity+++GO:0014070///response to organic cyclic compound+++GO:0042698///ovulation cycle+++GO:0030728///ovulation+++GO:0031960///response to corticosteroid+++GO:1990637///response to prolactin+++GO:0044849///estrous cycle+++GO:0032496///response to lipopolysaccharide+++GO:0048545///response to steroid hormone+++GO:…
361873	Cxadrl1	4.01	1.33	2.22	6.16	1.16	2.15	1.6	2.38	0.914983	0.156126	0.315851		GO:0030426///growth cone+++GO:0016021///integral component of membrane+++GO:0045121///membrane raft+++GO:0016327///apicolateral plasma membrane+++GO:0044297///cell body+++GO:0005737///cytoplasm+++GO:0005912///adherens junction+++GO:0005634///nucleus+++GO:0030175///filopodium+++GO:0043005///neuron projection+++GO:0001669///acrosomal vesicle+++GO:0014704///intercalated disc+++GO:0016323///basolater…	GO:0008013///beta-catenin binding+++GO:0050839///cell adhesion molecule binding+++GO:0071253///connexin binding+++GO:0030165///PDZ domain binding	GO:0007157///heterophilic cell-cell adhesion via plasma membrane cell adhesion molecules+++GO:0030593///neutrophil chemotaxis+++GO:0098904///regulation of AV node cell action potential+++GO:0060044///negative regulation of cardiac muscle cell proliferation+++GO:0046629///gamma-delta T cell activation+++GO:0007005///mitochondrion organization+++GO:0031532///actin cytoskeleton reorganization+++GO:0…
297756	LOC297756	0	2.59	0	2.5	0	0	2.71	0	0.912066	0.388959	0.586054	03010///Ribosome	GO:0005840///ribosome+++GO:0022627///cytosolic small ribosomal subunit	GO:0003735///structural constituent of ribosome	GO:0006412///translation+++GO:0000462///maturation of SSU-rRNA from tricistronic rRNA transcript (SSU-rRNA, 5.8S rRNA, LSU-rRNA)
114768	Uox	3	3	5	4	1	2	3	2	0.909584	0.14007	0.292936	00232///Caffeine metabolism+++00230///Purine metabolism+++01120///Microbial metabolism in diverse environments+++01100///Metabolic pathways	GO:0005777///peroxisome+++GO:0005782///peroxisomal matrix	GO:0004846///urate oxidase activity+++GO:0016491///oxidoreductase activity	GO:0006145///purine nucleobase catabolic process+++GO:0019628///urate catabolic process+++GO:0006144///purine nucleobase metabolic process+++GO:0055114///oxidation-reduction process
500931	Fam186b	4	3	3	5	3	3	1	1	0.909584	0.14007	0.292936		GO:0032991///protein-containing complex
100911599	LOC100911599	81.31	49.13	72.36	30.6	21.27	39.92	38.02	25.27	0.909584	5.87017e-09	8.16635e-08	04146///Peroxisome	GO:0097733///photoreceptor cell cilium+++GO:0005778///peroxisomal membrane+++GO:0001750///photoreceptor outer segment+++GO:0005829///cytosol	GO:0008022///protein C-terminus binding+++GO:0042623///ATPase activity, coupled+++GO:0044877///protein-containing complex binding+++GO:0005524///ATP binding	GO:0007031///peroxisome organization+++GO:0050821///protein stabilization+++GO:0016561///protein import into peroxisome matrix, translocation
81508	Bhmt	12.56	7.91	11.63	12	3.21	4.35	8.46	7.52	0.908358	0.0114997	0.0415266	00260///Glycine, serine and threonine metabolism+++00270///Cysteine and methionine metabolism+++01100///Metabolic pathways	GO:0005829///cytosol+++GO:0032991///protein-containing complex+++GO:0005737///cytoplasm+++GO:0070062///extracellular exosome	GO:0047150///betaine-homocysteine S-methyltransferase activity+++GO:0008168///methyltransferase activity+++GO:0008270///zinc ion binding+++GO:0046872///metal ion binding+++GO:0016740///transferase activity+++GO:0044877///protein-containing complex binding	GO:0006479///protein methylation+++GO:0009086///methionine biosynthetic process+++GO:0032259///methylation+++GO:0006579///amino-acid betaine catabolic process+++GO:0010243///response to organonitrogen compound+++GO:0071267///L-methionine salvage+++GO:0006577///amino-acid betaine metabolic process
103694556	LOC103694556	0.13	0.27	0.38	0.4	0.36	0	0.13	0.14	0.908056	0.679412	0.82095	04120///Ubiquitin mediated proteolysis	GO:0005737///cytoplasm	GO:0005524///ATP binding+++GO:0004839///ubiquitin activating enzyme activity	GO:0006974///cellular response to DNA damage stimulus+++GO:0007283///spermatogenesis+++GO:0006511///ubiquitin-dependent protein catabolic process
103694557	LOC103694557	0.13	0.27	0.38	0.4	0.36	0	0.13	0.14	0.908056	0.679412	0.82095	04120///Ubiquitin mediated proteolysis	GO:0005737///cytoplasm	GO:0004839///ubiquitin activating enzyme activity+++GO:0005524///ATP binding	GO:0006974///cellular response to DNA damage stimulus+++GO:0006511///ubiquitin-dependent protein catabolic process+++GO:0007283///spermatogenesis
113918	Slc6a20	277.96	121.66	227.73	681.98	44.95	83.45	191.08	381.03	0.905045	6.92541e-43	5.63652e-41		GO:0005887///integral component of plasma membrane+++GO:0016021///integral component of membrane+++GO:0016020///membrane+++GO:0016324///apical plasma membrane+++GO:0005886///plasma membrane	GO:0005328///neurotransmitter:sodium symporter activity+++GO:0015293///symporter activity+++GO:0015193///L-proline transmembrane transporter activity+++GO:0015171///amino acid transmembrane transporter activity	GO:0015816///glycine transport+++GO:0015838///amino-acid betaine transport+++GO:0015824///proline transport+++GO:0006836///neurotransmitter transport+++GO:0003333///amino acid transmembrane transport+++GO:0006865///amino acid transport+++GO:0055085///transmembrane transport+++GO:0035524///proline transmembrane transport
100910720	LOC100910720	0	2.81	10.45	2.87	2.51	2.79	0	3.34	0.903337	0.1282	0.274921		GO:0005634///nucleus+++GO:0005730///nucleolus+++GO:0071013///catalytic step 2 spliceosome+++GO:0005783///endoplasmic reticulum	GO:0004004///ATP-dependent RNA helicase activity+++GO:0046872///metal ion binding+++GO:0005524///ATP binding+++GO:0003677///DNA binding+++GO:0003723///RNA binding	GO:0051607///defense response to virus+++GO:0045944///positive regulation of transcription by RNA polymerase II+++GO:0010501///RNA secondary structure unwinding+++GO:0000398///mRNA splicing, via spliceosome+++GO:0035458///cellular response to interferon-beta+++GO:0008283///cell proliferation+++GO:0030154///cell differentiation
310836	Abca4	13	9	52	10	9	12	12	12	0.903158	0.000518637	0.00289746	02010///ABC transporters	GO:0016020///membrane+++GO:0016021///integral component of membrane+++GO:0001750///photoreceptor outer segment+++GO:0043231///intracellular membrane-bounded organelle+++GO:0005887///integral component of plasma membrane+++GO:0005575///cellular_component	GO:0005524///ATP binding+++GO:0005548///phospholipid transporter activity+++GO:0000166///nucleotide binding+++GO:0003674///molecular_function+++GO:0090555///phosphatidylethanolamine-translocating ATPase activity+++GO:0004012///phospholipid-translocating ATPase activity+++GO:0016887///ATPase activity+++GO:0042626///ATPase activity, coupled to transmembrane movement of substances+++GO:0005319///lip…	GO:0055085///transmembrane transport+++GO:0045494///photoreceptor cell maintenance+++GO:0006869///lipid transport+++GO:0045332///phospholipid translocation+++GO:0006649///phospholipid transfer to membrane+++GO:0007601///visual perception+++GO:0008150///biological_process
24617	Serpine1	88.47	106.57	311.23	187.04	82.87	123.77	121.11	43.79	0.902676	2.11917e-23	9.02899e-22	04371///Apelin signaling pathway+++04066///HIF-1 signaling pathway+++04390///Hippo signaling pathway+++04218///Cellular senescence+++04115///p53 signaling pathway+++04610///Complement and coagulation cascades	GO:0042583///chromaffin granule+++GO:0062023///collagen-containing extracellular matrix+++GO:0070062///extracellular exosome+++GO:0005576///extracellular region+++GO:0005737///cytoplasm+++GO:0005615///extracellular space	GO:0004867///serine-type endopeptidase inhibitor activity+++GO:0005102///signaling receptor binding+++GO:0030414///peptidase inhibitor activity+++GO:0002020///protease binding	GO:0010469///regulation of signaling receptor activity+++GO:0032869///cellular response to insulin stimulus+++GO:0045766///positive regulation of angiogenesis+++GO:0070849///response to epidermal growth factor+++GO:0071316///cellular response to nicotine+++GO:1905043///positive regulation of epithelium regeneration+++GO:0008585///female gonad development+++GO:0035690///cellular response to drug++…
29403	Asgr2	78	61	77	60	24	25	54	45	0.901764	3.31178e-10	5.40933e-09	04918///Thyroid hormone synthesis	GO:0016020///membrane+++GO:0016021///integral component of membrane+++GO:0044322///endoplasmic reticulum quality control compartment+++GO:0048471///perinuclear region of cytoplasm	GO:0030246///carbohydrate binding	GO:0055088///lipid homeostasis+++GO:0006897///endocytosis+++GO:0030282///bone mineralization+++GO:0031647///regulation of protein stability+++GO:0009100///glycoprotein metabolic process
60378	Lypd3	5	19	6	11	3	5	3	11	0.900814	0.0155367	0.0534109		GO:0005886///plasma membrane+++GO:0031225///anchored component of membrane+++GO:0016021///integral component of membrane+++GO:0016020///membrane	GO:0043236///laminin binding	GO:0007160///cell-matrix adhesion
192262	C1s	1512	1505	2972	1785	632	954	1517	1071	0.89992	5.15947e-243	2.28516e-240	04610///Complement and coagulation cascades	GO:0005615///extracellular space+++GO:0005576///extracellular region	GO:0016787///hydrolase activity+++GO:0008233///peptidase activity+++GO:0005509///calcium ion binding+++GO:0042802///identical protein binding+++GO:0046872///metal ion binding+++GO:0008236///serine-type peptidase activity+++GO:0004252///serine-type endopeptidase activity+++GO:0003674///molecular_function	GO:0006508///proteolysis+++GO:0002376///immune system process+++GO:0006958///complement activation, classical pathway+++GO:0051591///response to cAMP+++GO:0010001///glial cell differentiation+++GO:0045087///innate immune response
100363289	LOC100363289	15.12	16.14	16.17	19.95	9.74	8.07	9.78	8.65	0.897431	0.00198803	0.00940907
29132	Atp1a4	38.64	20.71	23.25	48.55	13.71	9.03	32.06	15.78	0.89658	1.62998e-05	0.00012796	04970///Salivary secretion+++04964///Proximal tubule bicarbonate reclamation+++04911///Insulin secretion+++04919///Thyroid hormone signaling pathway+++04971///Gastric acid secretion+++04925///Aldosterone synthesis and secretion+++04261///Adrenergic signaling in cardiomyocytes+++04972///Pancreatic secretion+++04024///cAMP signaling pathway+++04960///Aldosterone-regulated sodium reabsorption+++0497…	GO:0016020///membrane+++GO:0016021///integral component of membrane+++GO:0005886///plasma membrane+++GO:0005890///sodium:potassium-exchanging ATPase complex	GO:0005391///sodium:potassium-exchanging ATPase activity+++GO:0000166///nucleotide binding+++GO:0046872///metal ion binding+++GO:0016787///hydrolase activity+++GO:0005524///ATP binding	GO:0009566///fertilization+++GO:0036376///sodium ion export across plasma membrane+++GO:0007283///spermatogenesis+++GO:0006883///cellular sodium ion homeostasis+++GO:1990573///potassium ion import across plasma membrane+++GO:0030007///cellular potassium ion homeostasis+++GO:0006811///ion transport+++GO:0006814///sodium ion transport+++GO:0030317///flagellated sperm motility+++GO:0006813///potassi…
499754	Ccdc183	5	3	3	2	2	2	0	3	0.895778	0.175088	0.342795		GO:0005930///axoneme		GO:0036158///outer dynein arm assembly+++GO:0003341///cilium movement
680522	Hist1h1b	6	3	3	1	3	2	2	0	0.895778	0.175088	0.342795		GO:0005634///nucleus+++GO:0005694///chromosome+++GO:0005720///nuclear heterochromatin+++GO:0000786///nucleosome+++GO:0000790///nuclear chromatin	GO:0031490///chromatin DNA binding+++GO:0031492///nucleosomal DNA binding+++GO:0042826///histone deacetylase binding+++GO:0005515///protein binding+++GO:0003677///DNA binding+++GO:0003690///double-stranded DNA binding	GO:0016584///nucleosome positioning+++GO:0030261///chromosome condensation+++GO:0006355///regulation of transcription, DNA-templated+++GO:0045910///negative regulation of DNA recombination+++GO:0071169///establishment of protein localization to chromatin+++GO:0031936///negative regulation of chromatin silencing+++GO:0050821///protein stabilization+++GO:0051574///positive regulation of histone H3-…
316620	Mlph	3	7	11	5	3	4	2	5	0.895778	0.0551458	0.145929		GO:0030425///dendrite+++GO:0030864///cortical actin cytoskeleton+++GO:0048471///perinuclear region of cytoplasm	GO:0030674///protein binding, bridging+++GO:0017137///Rab GTPase binding+++GO:0046872///metal ion binding+++GO:0003779///actin binding+++GO:0017022///myosin binding	GO:0006886///intracellular protein transport
690955	Lilrb3b	76.59	115	78.28	7.78	54.7	40.68	16.26	37.92	0.895236	3.7608e-10	6.09052e-09	04380///Osteoclast differentiation	GO:0016020///membrane+++GO:0005886///plasma membrane+++GO:0016021///integral component of membrane	GO:0001540///amyloid-beta binding+++GO:0042803///protein homodimerization activity+++GO:0044877///protein-containing complex binding	GO:0002250///adaptive immune response+++GO:0002376///immune system process
687345	LOC687345	3.3	5.94	0	11.01	1.05	2.49	5.24	2.13	0.894964	0.0908107	0.213044		GO:0005789///endoplasmic reticulum membrane+++GO:0031090///organelle membrane	GO:0005506///iron ion binding+++GO:0020037///heme binding+++GO:0070330///aromatase activity	GO:0006954///inflammatory response+++GO:0006691///leukotriene metabolic process
287140	Prss34	9	10	31	0	1	6	17	3	0.891662	0.00807122	0.0309975		GO:0031012///extracellular matrix+++GO:0005615///extracellular space	GO:0004252///serine-type endopeptidase activity+++GO:0005539///glycosaminoglycan binding+++GO:0008233///peptidase activity+++GO:0008236///serine-type peptidase activity+++GO:0008201///heparin binding	GO:0019800///peptide cross-linking via chondroitin 4-sulfate glycosaminoglycan+++GO:0006508///proteolysis
501416	LOC501416	128.19	124.1	114.94	32.59	53.15	37	53.25	72.72	0.890211	7.39063e-14	1.78623e-12		GO:0016591///RNA polymerase II, holoenzyme	GO:0003899///DNA-directed 5'-3' RNA polymerase activity	GO:0051685///maintenance of ER location
407756	Btla	22	12	56	8	10	20	16	7	0.889483	0.000214718	0.00132511		GO:0016021///integral component of membrane+++GO:0005887///integral component of plasma membrane+++GO:0016020///membrane	GO:0038023///signaling receptor activity	GO:0002768///immune response-regulating cell surface receptor signaling pathway+++GO:0002376///immune system process+++GO:0002250///adaptive immune response
309767	Rsph4a	1.06	0.6	0	2.07	0	0	0	2.02	0.887514	0.471098	0.661608		GO:0001534///radial spoke+++GO:0005730///nucleolus+++GO:0005930///axoneme+++GO:0005634///nucleus+++GO:0005654///nucleoplasm		GO:0003341///cilium movement+++GO:0035082///axoneme assembly
25553	Slc6a4	12	8	11	17	3	9	3	11	0.887216	0.00974914	0.0362783	04726///Serotonergic synapse	GO:0005887///integral component of plasma membrane+++GO:0099056///integral component of presynaptic membrane+++GO:0005829///cytosol+++GO:0045121///membrane raft+++GO:0099154///serotonergic synapse+++GO:0005886///plasma membrane+++GO:0099055///integral component of postsynaptic membrane+++GO:0016020///membrane+++GO:0016021///integral component of membrane+++GO:0005768///endosome+++GO:0043005///neu…	GO:0017022///myosin binding+++GO:0051015///actin filament binding+++GO:0046872///metal ion binding+++GO:0019811///cocaine binding+++GO:0015293///symporter activity+++GO:0051378///serotonin binding+++GO:0050998///nitric-oxide synthase binding+++GO:0005515///protein binding+++GO:0008504///monoamine transmembrane transporter activity+++GO:0042803///protein homodimerization activity+++GO:0017137///Ra…	GO:0051259///protein complex oligomerization+++GO:0071300///cellular response to retinoic acid+++GO:0015844///monoamine transport+++GO:0042713///sperm ejaculation+++GO:0045787///positive regulation of cell cycle+++GO:0007420///brain development+++GO:0007613///memory+++GO:0046621///negative regulation of organ growth+++GO:0042493///response to drug+++GO:0010628///positive regulation of gene expres…
292401	Smoc2	439	373	814	738	279	353	415	237	0.883278	5.45725e-73	7.64216e-71		GO:0005615///extracellular space+++GO:0005604///basement membrane+++GO:0062023///collagen-containing extracellular matrix+++GO:0005614///interstitial matrix+++GO:0071944///cell periphery+++GO:0031012///extracellular matrix	GO:0005539///glycosaminoglycan binding+++GO:0005509///calcium ion binding+++GO:0008201///heparin binding	GO:0045766///positive regulation of angiogenesis+++GO:2000573///positive regulation of DNA biosynthetic process+++GO:0010811///positive regulation of cell-substrate adhesion+++GO:2001028///positive regulation of endothelial cell chemotaxis+++GO:0035470///positive regulation of vascular wound healing+++GO:1900748///positive regulation of vascular endothelial growth factor signaling pathway+++GO:00…
362119	C5	7	17	11	11	7	9	3	6	0.882399	0.011784	0.0424006	04610///Complement and coagulation cascades	GO:0005576///extracellular region+++GO:0005623///cell+++GO:0005579///membrane attack complex+++GO:0005615///extracellular space	GO:0004866///endopeptidase inhibitor activity+++GO:0031714///C5a anaphylatoxin chemotactic receptor binding	GO:0010575///positive regulation of vascular endothelial growth factor production+++GO:0002376///immune system process+++GO:0042593///glucose homeostasis+++GO:0033602///negative regulation of dopamine secretion+++GO:0045087///innate immune response+++GO:0010951///negative regulation of endopeptidase activity+++GO:0006874///cellular calcium ion homeostasis+++GO:0002523///leukocyte migration involv…
102549995	LOC102549995	0	0	0.8	0.8	0.87	0	0	0	0.881678	0.638794	0.793441		GO:0005576///extracellular region	GO:0046556///alpha-L-arabinofuranosidase activity	GO:0046373///L-arabinose metabolic process+++GO:0007605///sensory perception of sound
498012	Ace3	1	5	5	2	2.01	1	1	3.06	0.881423	0.181018	0.350639	04614///Renin-angiotensin system+++04924///Renin secretion	GO:0001669///acrosomal vesicle+++GO:0016020///membrane+++GO:0016021///integral component of membrane	GO:0008237///metallopeptidase activity+++GO:0008241///peptidyl-dipeptidase activity+++GO:0046872///metal ion binding+++GO:0008233///peptidase activity+++GO:0016787///hydrolase activity+++GO:0004180///carboxypeptidase activity	GO:0006508///proteolysis
108348047	LOC108348047	97.96	189.62	234.3	121.47	74.68	73.02	89.03	113.41	0.880365	5.4347e-21	2.04958e-19	04666///Fc gamma R-mediated phagocytosis+++04650///Natural killer cell mediated cytotoxicity+++04145///Phagosome+++04611///Platelet activation+++04380///Osteoclast differentiation	GO:0005886///plasma membrane+++GO:0016021///integral component of membrane+++GO:0009986///cell surface	GO:0034987///immunoglobulin receptor binding+++GO:0019864///IgG binding	GO:0021675///nerve development+++GO:1905449///regulation of Fc-gamma receptor signaling pathway involved in phagocytosis+++GO:1904467///regulation of tumor necrosis factor secretion+++GO:0001813///regulation of antibody-dependent cellular cytotoxicity
366270	Edn3	25	22	67	20	13	18	20	22	0.878958	1.83267e-05	0.000142811		GO:0005575///cellular_component+++GO:0005576///extracellular region	GO:0031705///bombesin receptor binding	GO:0046888///negative regulation of hormone secretion+++GO:0042310///vasoconstriction+++GO:0019229///regulation of vasoconstriction+++GO:0050880///regulation of blood vessel size+++GO:0046928///regulation of neurotransmitter secretion
405224	Olr1587	5	4	4	3	2	2	1	3.72	0.878365	0.13898	0.291409	04740///Olfactory transduction	GO:0016020///membrane+++GO:0005886///plasma membrane+++GO:0016021///integral component of membrane	GO:0004930///G protein-coupled receptor activity+++GO:0004984///olfactory receptor activity	GO:0007165///signal transduction+++GO:0007608///sensory perception of smell+++GO:0007186///G protein-coupled receptor signaling pathway+++GO:0050896///response to stimulus+++GO:0050911///detection of chemical stimulus involved in sensory perception of smell
100361556	LOC100361556	5	3	1	2	1	2	3	0	0.877162	0.220426	0.402513		GO:0009986///cell surface
289236	Vsig8	3	1	2	5	1	1	3	1	0.877162	0.220426	0.402513		GO:0016021///integral component of membrane+++GO:0016020///membrane
296130	Gpat2	4	3	0	4	2	2	1	1	0.877162	0.220426	0.402513	00564///Glycerophospholipid metabolism+++00561///Glycerolipid metabolism+++01100///Metabolic pathways+++01110///Biosynthesis of secondary metabolites	GO:0005739///mitochondrion+++GO:0031966///mitochondrial membrane+++GO:0005575///cellular_component	GO:0003674///molecular_function+++GO:0004366///glycerol-3-phosphate O-acyltransferase activity+++GO:0008374///O-acyltransferase activity+++GO:0016746///transferase activity, transferring acyl groups	GO:0019432///triglyceride biosynthetic process+++GO:0006631///fatty acid metabolic process+++GO:0044255///cellular lipid metabolic process+++GO:0008150///biological_process+++GO:0006072///glycerol-3-phosphate metabolic process+++GO:1990511///piRNA biosynthetic process+++GO:0008654///phospholipid biosynthetic process
311446	Hao1	2	3	3	3	0	2	1	3	0.877162	0.220426	0.402513	01110///Biosynthesis of secondary metabolites+++04146///Peroxisome+++01130///Biosynthesis of antibiotics+++00630///Glyoxylate and dicarboxylate metabolism+++01120///Microbial metabolism in diverse environments+++01100///Metabolic pathways+++01200///Carbon metabolism	GO:0005777///peroxisome	GO:0003973///(S)-2-hydroxy-acid oxidase activity+++GO:0008891///glycolate oxidase activity+++GO:0016491///oxidoreductase activity+++GO:0005102///signaling receptor binding+++GO:0010181///FMN binding+++GO:0003824///catalytic activity	GO:0001561///fatty acid alpha-oxidation+++GO:0055114///oxidation-reduction process+++GO:0006979///response to oxidative stress+++GO:0046296///glycolate catabolic process
315829	Fam83b	2	5	1	3	0	3	1	2	0.877162	0.220426	0.402513		GO:0005737///cytoplasm+++GO:0016020///membrane	GO:0036313///phosphatidylinositol 3-kinase catalytic subunit binding+++GO:0036312///phosphatidylinositol 3-kinase regulatory subunit binding+++GO:0005154///epidermal growth factor receptor binding+++GO:0019901///protein kinase binding	GO:0008283///cell proliferation+++GO:0007173///epidermal growth factor receptor signaling pathway
363913	Fzd10	6	5	7	4	2	1	5	4	0.877162	0.0831006	0.200285	04310///Wnt signaling pathway+++04390///Hippo signaling pathway+++04916///Melanogenesis+++04150///mTOR signaling pathway+++04550///Signaling pathways regulating pluripotency of stem cells	GO:0005886///plasma membrane+++GO:0005737///cytoplasm+++GO:0009986///cell surface+++GO:0005654///nucleoplasm+++GO:0016021///integral component of membrane	GO:0042813///Wnt-activated receptor activity+++GO:0004930///G protein-coupled receptor activity+++GO:0017147///Wnt-protein binding	GO:0034260///negative regulation of GTPase activity+++GO:0007275///multicellular organism development+++GO:0043507///positive regulation of JUN kinase activity+++GO:0043547///positive regulation of GTPase activity+++GO:0016055///Wnt signaling pathway+++GO:0035567///non-canonical Wnt signaling pathway+++GO:0032956///regulation of actin cytoskeleton organization+++GO:0038031///non-canonical Wnt sig…
365402	RGD1566289	3	3	4	1	1	1	1	3	0.877162	0.220426	0.402513		GO:0005576///extracellular region	GO:0005496///steroid binding
108351831	LOC108351831	9.05	13.1	9.06	11.21	8.06	5.02	3.02	7.04	0.877049	0.0161228	0.0549791		GO:0014069///postsynaptic density+++GO:0005829///cytosol+++GO:0005634///nucleus+++GO:0022627///cytosolic small ribosomal subunit+++GO:0005840///ribosome+++GO:0005654///nucleoplasm	GO:0008270///zinc ion binding+++GO:0003723///RNA binding+++GO:0003735///structural constituent of ribosome+++GO:0003677///DNA binding	GO:0006413///translational initiation+++GO:0008283///cell proliferation+++GO:0006614///SRP-dependent cotranslational protein targeting to membrane+++GO:0000028///ribosomal small subunit assembly+++GO:0006364///rRNA processing+++GO:0000184///nuclear-transcribed mRNA catabolic process, nonsense-mediated decay+++GO:0006412///translation
316018	Rtp3	4	2	2.01	3	1	2	2	1.02	0.873672	0.221778	0.404072		GO:0005737///cytoplasm+++GO:0009986///cell surface+++GO:0016021///integral component of membrane	GO:0031849///olfactory receptor binding	GO:0001580///detection of chemical stimulus involved in sensory perception of bitter taste+++GO:0051205///protein insertion into membrane+++GO:0006612///protein targeting to membrane
299343	Tdrd9	0	3.48	3.26	2	0	1.14	0	3.64	0.873316	0.276498	0.469039		GO:0005737///cytoplasm+++GO:0005634///nucleus+++GO:0071547///piP-body	GO:0016787///hydrolase activity+++GO:0003723///RNA binding+++GO:0003676///nucleic acid binding+++GO:0004386///helicase activity+++GO:0000166///nucleotide binding+++GO:0005524///ATP binding+++GO:0034459///ATP-dependent 3'-5' RNA helicase activity+++GO:0016887///ATPase activity	GO:0007283///spermatogenesis+++GO:0007275///multicellular organism development+++GO:0030154///cell differentiation+++GO:0009566///fertilization+++GO:0051321///meiotic cell cycle+++GO:0043046///DNA methylation involved in gamete generation+++GO:0007141///male meiosis I+++GO:0010529///negative regulation of transposition+++GO:0031047///gene silencing by RNA+++GO:0034587///piRNA metabolic process+++…
29142	Vnn1	8	3	12	8	7	4	3	3	0.869427	0.0411793	0.115775	00770///Pantothenate and CoA biosynthesis	GO:0005575///cellular_component	GO:0016811///hydrolase activity, acting on carbon-nitrogen (but not peptide) bonds, in linear amides+++GO:0017159///pantetheine hydrolase activity+++GO:0003674///molecular_function	GO:0006954///inflammatory response+++GO:0008150///biological_process+++GO:0002526///acute inflammatory response+++GO:0098609///cell-cell adhesion+++GO:0033089///positive regulation of T cell differentiation in thymus+++GO:0015939///pantothenate metabolic process+++GO:1902176///negative regulation of oxidative stress-induced intrinsic apoptotic signaling pathway+++GO:0006807///nitrogen compound me…
685590	LOC685590	54.32	26.75	18.35	76.69	40.59	26.72	15.48	13.79	0.869374	1.13794e-06	1.11885e-05	04151///PI3K-Akt signaling pathway+++04510///Focal adhesion+++04152///AMPK signaling pathway+++04620///Toll-like receptor signaling pathway+++04664///Fc epsilon RI signaling pathway+++04670///Leukocyte transendothelial migration+++04150///mTOR signaling pathway+++04370///VEGF signaling pathway+++04625///C-type lectin receptor signaling pathway+++04923///Regulation of lipolysis in adipocytes+++046…	GO:0005943///phosphatidylinositol 3-kinase complex, class IA+++GO:0005886///plasma membrane+++GO:0005942///phosphatidylinositol 3-kinase complex+++GO:0005829///cytosol+++GO:0005737///cytoplasm	GO:0004674///protein serine/threonine kinase activity+++GO:0035005///1-phosphatidylinositol-4-phosphate 3-kinase activity+++GO:0016303///1-phosphatidylinositol-3-kinase activity+++GO:0005524///ATP binding+++GO:0046934///phosphatidylinositol-4,5-bisphosphate 3-kinase activity	GO:0045087///innate immune response+++GO:0006468///protein phosphorylation+++GO:0030168///platelet activation+++GO:0006909///phagocytosis+++GO:0014870///response to muscle inactivity+++GO:1903544///response to butyrate+++GO:0002250///adaptive immune response+++GO:0010629///negative regulation of gene expression+++GO:0014065///phosphatidylinositol 3-kinase signaling+++GO:0071548///response to dexa…
499949	Apcdd1l	4.83	2.07	6.73	4.09	0.99	2.12	6.61	0	0.869044	0.122815	0.26704		GO:0016021///integral component of membrane
501072	Acaa1b	1.11	0	1.2	5.69	3.44	0.95	0	0	0.868472	0.300096	0.496726	03320///PPAR signaling pathway+++01040///Biosynthesis of unsaturated fatty acids+++00592///alpha-Linolenic acid metabolism+++01100///Metabolic pathways+++01212///Fatty acid metabolism+++04146///Peroxisome+++00280///Valine, leucine and isoleucine degradation+++01130///Biosynthesis of antibiotics+++00071///Fatty acid degradation+++01110///Biosynthesis of secondary metabolites	GO:0005777///peroxisome	GO:0016740///transferase activity+++GO:0003824///catalytic activity+++GO:0005515///protein binding+++GO:0016746///transferase activity, transferring acyl groups+++GO:0003988///acetyl-CoA C-acyltransferase activity+++GO:0016747///transferase activity, transferring acyl groups other than amino-acyl groups	GO:0006629///lipid metabolic process+++GO:0006631///fatty acid metabolic process+++GO:0006635///fatty acid beta-oxidation+++GO:0010124///phenylacetate catabolic process
363677	Gjd3	9	2	2	7	3	3	4	1	0.86519	0.102436	0.232887		GO:0030054///cell junction+++GO:0009986///cell surface+++GO:0005921///gap junction+++GO:0005922///connexin complex+++GO:0016020///membrane+++GO:0016021///integral component of membrane+++GO:0005886///plasma membrane	GO:0086077///gap junction channel activity involved in AV node cell-bundle of His cell electrical coupling+++GO:0005243///gap junction channel activity+++GO:0005216///ion channel activity	GO:0007154///cell communication+++GO:0007507///heart development+++GO:0016264///gap junction assembly+++GO:0007268///chemical synaptic transmission+++GO:0055085///transmembrane transport+++GO:0086053///AV node cell to bundle of His cell communication by electrical coupling+++GO:0001570///vasculogenesis+++GO:0009749///response to glucose+++GO:0048738///cardiac muscle tissue development+++GO:004846…
102551486	LOC102551486	3	6	7	4	3	5.01	0	3	0.863879	0.102879	0.233532
685394	Arl14epl	9.73	9.05	8.69	15.18	8.21	6.76	5.43	3.08	0.863807	0.0172344	0.058073
298579	Pla2g2d	30	52	171	32	25	41	54	37	0.862891	7.69452e-10	1.20512e-08	04014///Ras signaling pathway+++04972///Pancreatic secretion+++00565///Ether lipid metabolism+++01100///Metabolic pathways+++00592///alpha-Linolenic acid metabolism+++04975///Fat digestion and absorption+++00591///Linoleic acid metabolism+++00590///Arachidonic acid metabolism+++01110///Biosynthesis of secondary metabolites+++00564///Glycerophospholipid metabolism+++04270///Vascular smooth muscle …	GO:0005576///extracellular region	GO:0004623///phospholipase A2 activity+++GO:0016787///hydrolase activity+++GO:0043395///heparan sulfate proteoglycan binding+++GO:0102567///phospholipase A2 activity (consuming 1,2-dipalmitoylphosphatidylcholine)+++GO:0005543///phospholipid binding+++GO:0008201///heparin binding+++GO:0005509///calcium ion binding+++GO:0102568///phospholipase A2 activity consuming 1,2-dioleoylphosphatidylethanolam…	GO:0016042///lipid catabolic process+++GO:0042130///negative regulation of T cell proliferation+++GO:0006629///lipid metabolic process+++GO:0002361///CD4-positive, CD25-positive, alpha-beta regulatory T cell differentiation+++GO:0006644///phospholipid metabolic process+++GO:0050482///arachidonic acid secretion+++GO:0050868///negative regulation of T cell activation
365855	RGD1563667	3.51	4.7	3	11.45	2.35	3.74	1.18	5.22	0.862068	0.0830893	0.200283		GO:0005634///nucleus+++GO:0005737///cytoplasm	GO:0031625///ubiquitin protein ligase binding	GO:0006511///ubiquitin-dependent protein catabolic process+++GO:0043161///proteasome-mediated ubiquitin-dependent protein catabolic process+++GO:0030162///regulation of proteolysis
494201	Oas1e	1.29	5	4.03	1	2.11	4.13	0	0	0.861949	0.220667	0.402663		GO:0005654///nucleoplasm+++GO:0005829///cytosol+++GO:0005634///nucleus	GO:0001730///2'-5'-oligoadenylate synthetase activity+++GO:0005524///ATP binding+++GO:0016740///transferase activity+++GO:0003723///RNA binding+++GO:0003725///double-stranded RNA binding	GO:0051607///defense response to virus+++GO:0006955///immune response+++GO:0045071///negative regulation of viral genome replication+++GO:0060700///regulation of ribonuclease activity
108350568	LOC108350568	1.07	4.22	4.17	2.13	0	1.05	2.1	3.25	0.85943	0.216386	0.397672
24470	Hsd3b5	0	1.38	0.92	1.19	0	0	0	1.93	0.85732	0.498445	0.684814	04913///Ovarian steroidogenesis+++04925///Aldosterone synthesis and secretion+++04927///Cortisol synthesis and secretion+++01100///Metabolic pathways+++00140///Steroid hormone biosynthesis	GO:0005739///mitochondrion+++GO:0016020///membrane+++GO:0005783///endoplasmic reticulum+++GO:0031966///mitochondrial membrane+++GO:0043231///intracellular membrane-bounded organelle+++GO:0016021///integral component of membrane+++GO:0005789///endoplasmic reticulum membrane	GO:0000253///3-keto sterol reductase activity+++GO:0016853///isomerase activity+++GO:0003854///3-beta-hydroxy-delta5-steroid dehydrogenase activity+++GO:0005496///steroid binding+++GO:0016229///steroid dehydrogenase activity+++GO:0016616///oxidoreductase activity, acting on the CH-OH group of donors, NAD or NADP as acceptor+++GO:0047024///5alpha-androstane-3beta,17beta-diol dehydrogenase activity…	GO:0051412///response to corticosterone+++GO:0021766///hippocampus development+++GO:0050810///regulation of steroid biosynthetic process+++GO:0006694///steroid biosynthetic process+++GO:0008207///C21-steroid hormone metabolic process+++GO:0042448///progesterone metabolic process+++GO:0055114///oxidation-reduction process
316137	Adgre1	191	279	447	294	107	132	218	213	0.856659	2.06874e-36	1.48117e-34		GO:0016021///integral component of membrane+++GO:0016020///membrane+++GO:0005886///plasma membrane+++GO:0071944///cell periphery+++GO:0005887///integral component of plasma membrane+++GO:0009897///external side of plasma membrane	GO:0005509///calcium ion binding+++GO:0004888///transmembrane signaling receptor activity+++GO:0004930///G protein-coupled receptor activity	GO:0007165///signal transduction+++GO:0002250///adaptive immune response+++GO:0007189///adenylate cyclase-activating G protein-coupled receptor signaling pathway+++GO:0007186///G protein-coupled receptor signaling pathway+++GO:0007166///cell surface receptor signaling pathway+++GO:0002376///immune system process
362741	Pax9	54.98	41	48	83	18	19	52	37	0.851835	5.65275e-08	6.81802e-07		GO:0005575///cellular_component+++GO:0005634///nucleus	GO:0003674///molecular_function+++GO:0003700///DNA-binding transcription factor activity+++GO:0000977///RNA polymerase II regulatory region sequence-specific DNA binding+++GO:0001228///DNA-binding transcription activator activity, RNA polymerase II-specific+++GO:0003677///DNA binding	GO:0042481///regulation of odontogenesis+++GO:0071363///cellular response to growth factor stimulus+++GO:0008150///biological_process+++GO:0042476///odontogenesis+++GO:0007492///endoderm development+++GO:0007275///multicellular organism development+++GO:0009887///animal organ morphogenesis+++GO:0045892///negative regulation of transcription, DNA-templated+++GO:0006355///regulation of transcriptio…
294093	Ankrd22	2	4	3	0	1	3	0	1	0.85069	0.280185	0.473669		GO:0016021///integral component of membrane+++GO:0016020///membrane
680678	Tcf24	3	1	3	2	1	3	0	1	0.85069	0.280185	0.473669		GO:0005634///nucleus	GO:0046983///protein dimerization activity	GO:0006355///regulation of transcription, DNA-templated+++GO:0006351///transcription, DNA-templated
108349232	LOC108349232	4	6	1	6	2	2	2	3.45	0.849842	0.138095	0.289936			GO:0003676///nucleic acid binding+++GO:0005198///structural molecule activity+++GO:0008270///zinc ion binding	GO:0016032///viral process
103690108	LOC103690108	1216.14	505.68	1452.47	1901.53	480.25	552.08	1225.06	567.69	0.848043	2.65183e-144	7.42708e-142	04612///Antigen processing and presentation+++04145///Phagosome+++04218///Cellular senescence+++04514///Cell adhesion molecules (CAMs)+++04144///Endocytosis	GO:0016020///membrane+++GO:0016021///integral component of membrane	GO:0005102///signaling receptor binding+++GO:0042605///peptide antigen binding	GO:0002474///antigen processing and presentation of peptide antigen via MHC class I+++GO:0006955///immune response
102551365	LOC102551365	9	16	31	14	8	8	18	5	0.846574	0.00270622	0.0122919			GO:0008270///zinc ion binding+++GO:0003676///nucleic acid binding
689008	Fbn2	68	100	173	120	42	43	87	85	0.845692	1.47016e-14	3.77857e-13		GO:0005576///extracellular region+++GO:0001527///microfibril+++GO:0031012///extracellular matrix+++GO:0062023///collagen-containing extracellular matrix	GO:0005509///calcium ion binding+++GO:0005201///extracellular matrix structural constituent	GO:0030326///embryonic limb morphogenesis+++GO:0048048///embryonic eye morphogenesis+++GO:0060346///bone trabecula formation+++GO:0043010///camera-type eye development+++GO:0030501///positive regulation of bone mineralization+++GO:0035108///limb morphogenesis+++GO:0045669///positive regulation of osteoblast differentiation+++GO:0035583///sequestering of TGFbeta in extracellular matrix
25293	Aqp4	123.58	15.22	65.07	93.74	27	47.54	16.52	75.31	0.841721	7.55355e-10	1.18596e-08	04962///Vasopressin-regulated water reabsorption+++04976///Bile secretion	GO:0016021///integral component of membrane+++GO:0009925///basal plasma membrane+++GO:0005886///plasma membrane+++GO:0031253///cell projection membrane+++GO:0042383///sarcolemma+++GO:0016323///basolateral plasma membrane+++GO:0016020///membrane+++GO:0005887///integral component of plasma membrane+++GO:0030315///T-tubule+++GO:0046930///pore complex+++GO:0032991///protein-containing complex+++GO:00…	GO:0015267///channel activity+++GO:0015288///porin activity+++GO:0005515///protein binding+++GO:0015250///water channel activity	GO:0071392///cellular response to estradiol stimulus+++GO:0009314///response to radiation+++GO:0015670///carbon dioxide transport+++GO:0071333///cellular response to glucose stimulus+++GO:0071346///cellular response to interferon-gamma+++GO:0051260///protein homooligomerization+++GO:0006833///water transport+++GO:0060354///negative regulation of cell adhesion molecule production+++GO:0042538///hy…
170672	Nphs2	7.34	10.7	10.19	17.88	6.12	7.89	4.13	7.7	0.838167	0.0157963	0.0540984		GO:0005886///plasma membrane+++GO:0032991///protein-containing complex+++GO:0045121///membrane raft+++GO:0005911///cell-cell junction+++GO:0036057///slit diaphragm+++GO:0031235///intrinsic component of the cytoplasmic side of the plasma membrane+++GO:0005575///cellular_component+++GO:0005887///integral component of plasma membrane+++GO:0016020///membrane+++GO:0016021///integral component of membr…	GO:0003674///molecular_function	GO:0008150///biological_process+++GO:0072249///metanephric glomerular visceral epithelial cell development+++GO:0007588///excretion+++GO:0031532///actin cytoskeleton reorganization
305340	Rbm47	17	23	45	22	16	11	13	20	0.83727	0.00023941	0.00146468		GO:0005634///nucleus	GO:0003676///nucleic acid binding+++GO:0003723///RNA binding	GO:0002244///hematopoietic progenitor cell differentiation+++GO:0016554///cytidine to uridine editing
108351322	LOC108351322	11	5	15	17	3	5	14	5	0.832768	0.0143259	0.0498334		GO:0016021///integral component of membrane
117249	Dnah3	2	4	3	7	2	3	0	4	0.832768	0.157385	0.317638		GO:0005874///microtubule+++GO:0036156///inner dynein arm	GO:0008569///ATP-dependent microtubule motor activity, minus-end-directed+++GO:0045503///dynein light chain binding+++GO:0051959///dynein light intermediate chain binding+++GO:0045505///dynein intermediate chain binding+++GO:0005524///ATP binding	GO:0003341///cilium movement+++GO:0036159///inner dynein arm assembly
311956	Wdr86	3	5	4	4	3	0	1	5	0.832768	0.157385	0.317638
313018	Kdf1	1.87	4.67	4.63	0	2.6	0	3.69	0	0.831191	0.238211	0.425225		GO:0030054///cell junction+++GO:0005737///cytoplasm		GO:0007275///multicellular organism development+++GO:0003334///keratinocyte development+++GO:0016331///morphogenesis of embryonic epithelium+++GO:2000647///negative regulation of stem cell proliferation+++GO:0048589///developmental growth+++GO:0030154///cell differentiation+++GO:0045606///positive regulation of epidermal cell differentiation+++GO:0060887///limb epidermis development+++GO:0010482/…
103690143	LOC103690143	1	0	0	2.55	1	0	1	0	0.830512	0.506394	0.693084		GO:0005576///extracellular region		GO:0042628///mating plug formation+++GO:1901318///negative regulation of flagellated sperm motility+++GO:0050817///coagulation
83497	Ocln	100.57	77.2	112.65	130.31	36.74	37.71	80.85	82.14	0.828025	5.38815e-13	1.18633e-11	04670///Leukocyte transendothelial migration+++04514///Cell adhesion molecules (CAMs)+++04530///Tight junction	GO:0016020///membrane+++GO:0016327///apicolateral plasma membrane+++GO:0005911///cell-cell junction+++GO:0030054///cell junction+++GO:0005886///plasma membrane+++GO:0016328///lateral plasma membrane+++GO:0016021///integral component of membrane+++GO:0005923///bicellular tight junction+++GO:0031410///cytoplasmic vesicle+++GO:0016324///apical plasma membrane+++GO:0030139///endocytic vesicle	GO:0005515///protein binding+++GO:0019904///protein domain specific binding	GO:0070673///response to interleukin-18+++GO:0070830///bicellular tight junction assembly+++GO:0045216///cell-cell junction organization+++GO:0071356///cellular response to tumor necrosis factor
108349777	LOC108349777	1.16	1.79	1.86	4.35	0	2.89	2.28	0	0.827877	0.287128	0.481623			GO:0003676///nucleic acid binding+++GO:0008270///zinc ion binding+++GO:0003964///RNA-directed DNA polymerase activity+++GO:0004523///RNA-DNA hybrid ribonuclease activity	GO:0015074///DNA integration
100909612	LOC100909612	1	1	0	1.54	0	0	1	1	0.826443	0.508778	0.695248	03320///PPAR signaling pathway+++04714///Thermogenesis+++04371///Apelin signaling pathway	GO:0005739///mitochondrion+++GO:0016021///integral component of membrane+++GO:0031966///mitochondrial membrane+++GO:0016020///membrane	GO:0022857///transmembrane transporter activity+++GO:0017077///oxidative phosphorylation uncoupler activity	GO:0006839///mitochondrial transport+++GO:1990542///mitochondrial transmembrane transport+++GO:1990845///adaptive thermogenesis+++GO:1902600///proton transmembrane transport+++GO:0009409///response to cold+++GO:0071398///cellular response to fatty acid
688583	LOC688583	62.87	36.02	62.51	14.79	32.27	21.57	21.79	23.99	0.825318	3.2239e-06	2.9196e-05		GO:0005634///nucleus+++GO:0005694///chromosome+++GO:0005737///cytoplasm	GO:0003723///RNA binding+++GO:0008301///DNA binding, bending+++GO:0003677///DNA binding+++GO:0000400///four-way junction DNA binding	GO:0045638///negative regulation of myeloid cell differentiation+++GO:0045578///negative regulation of B cell differentiation+++GO:0032392///DNA geometric change+++GO:0006355///regulation of transcription, DNA-templated+++GO:0006351///transcription, DNA-templated+++GO:0045087///innate immune response
102550582	LOC102550582	0	2.01	5.94	6.14	0	0	7.99	0	0.821098	0.189891	0.362882			GO:0003964///RNA-directed DNA polymerase activity+++GO:0004519///endonuclease activity	GO:0015074///DNA integration+++GO:0019068///virion assembly
300718	Sh2d7	14.74	17.46	16.33	9.12	5.82	6.89	6.61	13.38	0.820723	0.00803489	0.0308953		GO:0005737///cytoplasm
100909893	LOC100909893	9	8	6	14	6	6	7	2	0.819829	0.0338813	0.099318		GO:0016021///integral component of membrane
297584	Clec4a2	12	17	10	5	5	6	5	9	0.818269	0.020905	0.0678371		GO:0016020///membrane+++GO:0016021///integral component of membrane	GO:0030246///carbohydrate binding	GO:0032720///negative regulation of tumor necrosis factor production+++GO:0002250///adaptive immune response+++GO:0045087///innate immune response+++GO:0001818///negative regulation of cytokine production+++GO:0042590///antigen processing and presentation of exogenous peptide antigen via MHC class I+++GO:0002470///plasmacytoid dendritic cell antigen processing and presentation+++GO:0036037///CD8-…
108353009	LOC108353009	5.44	2.45	3.22	1.66	0	2.02	2.85	2.39	0.81741	0.213803	0.394123		GO:0005886///plasma membrane+++GO:0016021///integral component of membrane	GO:0046872///metal ion binding
108353010	LOC108353010	5.44	2.45	3.22	1.66	0	2.02	2.85	2.39	0.81741	0.213803	0.394123		GO:0005886///plasma membrane+++GO:0016021///integral component of membrane	GO:0046872///metal ion binding
24186	Alb	15	8	17	11	11	5	7	6	0.817138	0.0130028	0.0460293	04918///Thyroid hormone synthesis	GO:0070062///extracellular exosome+++GO:0005794///Golgi apparatus+++GO:0005615///extracellular space+++GO:0005737///cytoplasm+++GO:0032991///protein-containing complex+++GO:0005604///basement membrane+++GO:0043209///myelin sheath+++GO:0005576///extracellular region+++GO:0005783///endoplasmic reticulum	GO:0046872///metal ion binding+++GO:0015643///toxic substance binding+++GO:0008289///lipid binding+++GO:0003677///DNA binding+++GO:0005504///fatty acid binding+++GO:0042802///identical protein binding+++GO:0008144///drug binding+++GO:0008270///zinc ion binding+++GO:0030170///pyridoxal phosphate binding+++GO:0051087///chaperone binding+++GO:0019825///oxygen binding+++GO:0019899///enzyme binding	GO:0009267///cellular response to starvation+++GO:0043066///negative regulation of apoptotic process+++GO:0070541///response to platinum ion+++GO:0010033///response to organic substance+++GO:0042311///vasodilation+++GO:0019836///hemolysis by symbiont of host erythrocytes+++GO:0046010///positive regulation of circadian sleep/wake cycle, non-REM sleep+++GO:0046689///response to mercury ion+++GO:005…
307049	RGD1564062	2.23	4.25	0	6.11	1.76	0	4.27	1.13	0.81694	0.217287	0.398674		GO:0015934///large ribosomal subunit+++GO:0005783///endoplasmic reticulum+++GO:0005829///cytosol	GO:0003735///structural constituent of ribosome	GO:0006412///translation
304966	Fcgr3a	39	23	52	30	17	21	15	29	0.815066	3.12232e-05	0.000232738	04650///Natural killer cell mediated cytotoxicity+++04380///Osteoclast differentiation+++04145///Phagosome	GO:0009897///external side of plasma membrane+++GO:0009986///cell surface+++GO:0016021///integral component of membrane	GO:0019767///IgE receptor activity+++GO:0019770///IgG receptor activity+++GO:0019864///IgG binding+++GO:0019863///IgE binding	GO:0051930///regulation of sensory perception of pain+++GO:0045780///positive regulation of bone resorption+++GO:0042060///wound healing+++GO:0071222///cellular response to lipopolysaccharide+++GO:0042119///neutrophil activation
684440	Tlr8	58	65	104	61	27	18	61	58	0.815066	3.87849e-09	5.56637e-08	04620///Toll-like receptor signaling pathway	GO:0005886///plasma membrane+++GO:0016021///integral component of membrane+++GO:0016020///membrane+++GO:0009897///external side of plasma membrane	GO:0003725///double-stranded RNA binding+++GO:0008329///signaling pattern recognition receptor activity+++GO:0004888///transmembrane signaling receptor activity+++GO:0003677///DNA binding+++GO:0003723///RNA binding+++GO:0008144///drug binding+++GO:0003727///single-stranded RNA binding	GO:0045087///innate immune response+++GO:0045089///positive regulation of innate immune response+++GO:0002755///MyD88-dependent toll-like receptor signaling pathway+++GO:0007249///I-kappaB kinase/NF-kappaB signaling+++GO:0032755///positive regulation of interleukin-6 production+++GO:0001932///regulation of protein phosphorylation+++GO:0001774///microglial cell activation+++GO:0045416///positive r…
24646	Abcb1b	6.25	21.2	43.07	20.6	7.38	14.86	23.01	6.64	0.815005	0.000924932	0.00483539	04976///Bile secretion+++02010///ABC transporters	GO:0031526///brush border membrane+++GO:0016021///integral component of membrane+++GO:0045177///apical part of cell+++GO:0016324///apical plasma membrane+++GO:0016020///membrane	GO:0005515///protein binding+++GO:0016887///ATPase activity+++GO:0042626///ATPase activity, coupled to transmembrane movement of substances+++GO:0005524///ATP binding+++GO:0000166///nucleotide binding	GO:0036146///cellular response to mycotoxin+++GO:0071312///cellular response to alkaloid+++GO:0001666///response to hypoxia+++GO:0071217///cellular response to external biotic stimulus+++GO:0014072///response to isoquinoline alkaloid+++GO:0043215///daunorubicin transport+++GO:0010046///response to mycotoxin+++GO:1904478///regulation of intestinal absorption+++GO:0009914///hormone transport+++GO:0…
102554231	LOC102554231	0	0	1	7.53	1	0	0	3.86	0.814283	0.311202	0.506481		GO:0016021///integral component of membrane+++GO:0005886///plasma membrane	GO:0042288///MHC class I protein binding	GO:0045671///negative regulation of osteoclast differentiation+++GO:0007169///transmembrane receptor protein tyrosine kinase signaling pathway+++GO:0001773///myeloid dendritic cell activation
290681	Nat3	4.04	8	7.02	4	4.09	1	5.1	2.95	0.814121	0.0959519	0.221988	00232///Caffeine metabolism+++01120///Microbial metabolism in diverse environments+++00633///Nitrotoluene degradation+++00983///Drug metabolism - other enzymes+++01100///Metabolic pathways+++01110///Biosynthesis of secondary metabolites	GO:0005886///plasma membrane	GO:0015179///L-amino acid transmembrane transporter activity+++GO:0008080///N-acetyltransferase activity+++GO:0016746///transferase activity, transferring acyl groups+++GO:0016740///transferase activity+++GO:0016407///acetyltransferase activity+++GO:0004060///arylamine N-acetyltransferase activity	GO:0015807///L-amino acid transport+++GO:1902475///L-alpha-amino acid transmembrane transport
108348048	LOC108348048	2637.89	1198.12	3404.25	3956.83	70.28	3358.18	1492.4	1459.97	0.814001	1.39863e-294	7.39912e-292
502160	Lvrn	146	173	203	176	70	77	150	101	0.813152	5.69627e-20	2.02021e-18		GO:0005737///cytoplasm+++GO:0005886///plasma membrane	GO:0008237///metallopeptidase activity+++GO:0008233///peptidase activity+++GO:0016787///hydrolase activity+++GO:0042277///peptide binding+++GO:0046872///metal ion binding+++GO:0070006///metalloaminopeptidase activity+++GO:0004177///aminopeptidase activity+++GO:0008270///zinc ion binding	GO:0043171///peptide catabolic process+++GO:0006508///proteolysis
29252	Gzmm	41	31	23	33	13	12	18	30	0.812869	8.96211e-05	0.000600786		GO:0005576///extracellular region+++GO:0005575///cellular_component	GO:0008236///serine-type peptidase activity+++GO:0008233///peptidase activity+++GO:0004175///endopeptidase activity+++GO:0004252///serine-type endopeptidase activity+++GO:0016787///hydrolase activity	GO:0001913///T cell mediated cytotoxicity+++GO:0006915///apoptotic process+++GO:0008150///biological_process+++GO:0019835///cytolysis+++GO:0002376///immune system process+++GO:0008219///cell death+++GO:0006508///proteolysis+++GO:0045087///innate immune response
25314	Emp1	1098	1363	3017	1229	647	989	1185	1010	0.81064	4.75179e-176	1.5083e-173		GO:0005886///plasma membrane+++GO:0016020///membrane+++GO:0016021///integral component of membrane	GO:0003674///molecular_function	GO:0008150///biological_process+++GO:0008219///cell death+++GO:0032060///bleb assembly
102546579	LOC102546579	2	0	3	2	1	1	2	0	0.810048	0.361088	0.55767		GO:0016021///integral component of membrane	GO:0004930///G protein-coupled receptor activity
102548061	LOC102548061	5	2	3	4	2	1	2	3	0.810048	0.196498	0.371039
24886	Tbxas1	37	43	83	33	21	28	30	33	0.810048	1.34689e-06	1.30809e-05	04611///Platelet activation+++00590///Arachidonic acid metabolism+++01100///Metabolic pathways	GO:0005789///endoplasmic reticulum membrane+++GO:0005575///cellular_component+++GO:0016021///integral component of membrane+++GO:0016020///membrane+++GO:0005783///endoplasmic reticulum	GO:0005506///iron ion binding+++GO:0046872///metal ion binding+++GO:0016491///oxidoreductase activity+++GO:0016853///isomerase activity+++GO:0004796///thromboxane-A synthase activity+++GO:0004497///monooxygenase activity+++GO:0016705///oxidoreductase activity, acting on paired donors, with incorporation or reduction of molecular oxygen+++GO:0020037///heme binding+++GO:0003674///molecular_function	GO:0006631///fatty acid metabolic process+++GO:0070542///response to fatty acid+++GO:0006693///prostaglandin metabolic process+++GO:0045907///positive regulation of vasoconstriction+++GO:0045471///response to ethanol+++GO:0055114///oxidation-reduction process+++GO:0030644///cellular chloride ion homeostasis+++GO:0006633///fatty acid biosynthetic process+++GO:0001516///prostaglandin biosynthetic p…
252898	Acox2	3	4	3	4	2	5	0	1	0.810048	0.196498	0.371039	01100///Metabolic pathways+++03320///PPAR signaling pathway+++00120///Primary bile acid biosynthesis+++04146///Peroxisome	GO:0043231///intracellular membrane-bounded organelle+++GO:0005829///cytosol+++GO:0005777///peroxisome	GO:0005102///signaling receptor binding+++GO:0050660///flavin adenine dinucleotide binding+++GO:0005504///fatty acid binding+++GO:0071949///FAD binding+++GO:0016491///oxidoreductase activity+++GO:0003997///acyl-CoA oxidase activity+++GO:0033791///3alpha,7alpha,12alpha-trihydroxy-5beta-cholestanoyl-CoA 24-hydroxylase activity+++GO:0016627///oxidoreductase activity, acting on the CH-CH group of don…	GO:0010942///positive regulation of cell death+++GO:0006631///fatty acid metabolic process+++GO:0055114///oxidation-reduction process+++GO:0033540///fatty acid beta-oxidation using acyl-CoA oxidase+++GO:0006629///lipid metabolic process+++GO:1902884///positive regulation of response to oxidative stress+++GO:0006635///fatty acid beta-oxidation+++GO:0055088///lipid homeostasis
288322	Lipi	1	0	3	3	1	1	2	0	0.810048	0.361088	0.55767		GO:0005575///cellular_component+++GO:0005576///extracellular region	GO:0052689///carboxylic ester hydrolase activity+++GO:0003674///molecular_function+++GO:0008201///heparin binding+++GO:0004620///phospholipase activity	GO:0006629///lipid metabolic process+++GO:0016042///lipid catabolic process+++GO:0008150///biological_process
303236	Odf4	1	1	1	4	0	1	1	2	0.810048	0.361088	0.55767		GO:0001520///outer dense fiber+++GO:0016020///membrane+++GO:0016021///integral component of membrane+++GO:0005886///plasma membrane+++GO:0031514///motile cilium		GO:0030154///cell differentiation+++GO:0007275///multicellular organism development+++GO:0007283///spermatogenesis
680246	Tdgf1	2	4	1	0	0	1	3	0	0.810048	0.361088	0.55767	03010///Ribosome	GO:0005576///extracellular region+++GO:0005575///cellular_component+++GO:0045121///membrane raft+++GO:0016324///apical plasma membrane+++GO:0005615///extracellular space+++GO:0009986///cell surface	GO:0038100///nodal binding+++GO:0003674///molecular_function+++GO:0005102///signaling receptor binding+++GO:0008083///growth factor activity+++GO:0070697///activin receptor binding	GO:0002042///cell migration involved in sprouting angiogenesis+++GO:0030335///positive regulation of cell migration+++GO:0071346///cellular response to interferon-gamma+++GO:0043066///negative regulation of apoptotic process+++GO:0071354///cellular response to interleukin-6+++GO:0007368///determination of left/right symmetry+++GO:0008150///biological_process+++GO:0038092///nodal signaling pathway…
687030	Muc3	4	1	0	2	0	3	1	0	0.810048	0.361088	0.55767		GO:0016021///integral component of membrane
89810	Opn1mw	1	2	3	1	0	1	1	2	0.810048	0.361088	0.55767		GO:0016021///integral component of membrane+++GO:0005886///plasma membrane+++GO:0016020///membrane+++GO:0005887///integral component of plasma membrane+++GO:0001750///photoreceptor outer segment	GO:0003674///molecular_function+++GO:0008020///G protein-coupled photoreceptor activity+++GO:0004930///G protein-coupled receptor activity+++GO:0042802///identical protein binding+++GO:0009881///photoreceptor activity	GO:0009584///detection of visible light+++GO:0007186///G protein-coupled receptor signaling pathway+++GO:0007602///phototransduction+++GO:0071482///cellular response to light stimulus+++GO:0007601///visual perception+++GO:0007165///signal transduction+++GO:0008150///biological_process+++GO:0050896///response to stimulus+++GO:0018298///protein-chromophore linkage
89814	Tnfsf4	4	2	4	4	2	3	2	1	0.810048	0.196498	0.371039	04060///Cytokine-cytokine receptor interaction	GO:0005615///extracellular space+++GO:0016021///integral component of membrane+++GO:0016020///membrane+++GO:0009986///cell surface	GO:0005164///tumor necrosis factor receptor binding+++GO:0005125///cytokine activity+++GO:0032813///tumor necrosis factor receptor superfamily binding	GO:0002726///positive regulation of T cell cytokine production+++GO:0032743///positive regulation of interleukin-2 production+++GO:0050871///positive regulation of B cell activation+++GO:0006954///inflammatory response+++GO:2000525///positive regulation of T cell costimulation+++GO:0001816///cytokine production+++GO:2000570///positive regulation of T-helper 2 cell activation+++GO:0035783///CD4-po…
302369	Tbx22	8	9	4	7	4	3	4	5	0.810048	0.0677615	0.171315		GO:0005634///nucleus+++GO:0005575///cellular_component	GO:0003677///DNA binding+++GO:0000977///RNA polymerase II regulatory region sequence-specific DNA binding+++GO:0003674///molecular_function+++GO:0003700///DNA-binding transcription factor activity	GO:0045892///negative regulation of transcription, DNA-templated+++GO:0008150///biological_process+++GO:0000122///negative regulation of transcription by RNA polymerase II+++GO:0006355///regulation of transcription, DNA-templated
100909441	LOC100909441	914.67	1036.04	752.14	1288.45	0	704.06	731.58	845.69	0.809677	2.31887e-105	4.69817e-103	04530///Tight junction+++04145///Phagosome+++04210///Apoptosis+++04540///Gap junction	GO:0005874///microtubule+++GO:0005856///cytoskeleton+++GO:0005737///cytoplasm	GO:0005525///GTP binding+++GO:0005200///structural constituent of cytoskeleton+++GO:0000166///nucleotide binding+++GO:0003924///GTPase activity	GO:0000226///microtubule cytoskeleton organization+++GO:0000278///mitotic cell cycle+++GO:0007017///microtubule-based process
296510	Sp5	9	3	16	10.49	4	2	4	12	0.809673	0.0322953	0.0956554		GO:0005634///nucleus	GO:0000981///DNA-binding transcription factor activity, RNA polymerase II-specific+++GO:0043565///sequence-specific DNA binding+++GO:0000977///RNA polymerase II regulatory region sequence-specific DNA binding+++GO:0003676///nucleic acid binding	GO:0060349///bone morphogenesis+++GO:0071407///cellular response to organic cyclic compound+++GO:0036342///post-anal tail morphogenesis+++GO:0000122///negative regulation of transcription by RNA polymerase II+++GO:0006357///regulation of transcription by RNA polymerase II
60327	F13a1	153	149	495	84	87	129	170	118	0.808412	1.48339e-24	6.71049e-23	04610///Complement and coagulation cascades	GO:0005737///cytoplasm+++GO:0005575///cellular_component+++GO:0005576///extracellular region	GO:0046872///metal ion binding+++GO:0003810///protein-glutamine gamma-glutamyltransferase activity+++GO:0016740///transferase activity+++GO:0003674///molecular_function+++GO:0016746///transferase activity, transferring acyl groups	GO:0018149///peptide cross-linking+++GO:0007596///blood coagulation+++GO:0042060///wound healing+++GO:0007599///hemostasis+++GO:0072378///blood coagulation, fibrin clot formation
291669	RGD1564574	5	9.01	9.01	12.64	3.39	5.01	6	6.01	0.807724	0.0397567	0.112758		GO:0022627///cytosolic small ribosomal subunit+++GO:0015935///small ribosomal subunit	GO:0003735///structural constituent of ribosome+++GO:0003723///RNA binding	GO:0097421///liver regeneration+++GO:1990830///cellular response to leukemia inhibitory factor+++GO:0000462///maturation of SSU-rRNA from tricistronic rRNA transcript (SSU-rRNA, 5.8S rRNA, LSU-rRNA)+++GO:0042274///ribosomal small subunit biogenesis+++GO:0006364///rRNA processing+++GO:0006412///translation
114020	Nat8f5	42.78	33.51	31.05	54.84	25.62	13.18	28.32	25.72	0.807471	1.16518e-05	9.45096e-05	00480///Glutathione metabolism	GO:0016021///integral component of membrane+++GO:0016020///membrane	GO:0008080///N-acetyltransferase activity	GO:0007368///determination of left/right symmetry+++GO:0007507///heart development
296149	Sirpb3	7.03	5.16	6.89	2.26	2.76	4.09	1	4.37	0.807009	0.111952	0.249079		GO:0005886///plasma membrane+++GO:0016021///integral component of membrane+++GO:0016020///membrane
494199	Oas1f	117.32	105.63	68.47	28.48	30.15	37.2	79.4	36.45	0.806895	7.58528e-10	1.18996e-08			GO:0003725///double-stranded RNA binding+++GO:0016740///transferase activity+++GO:0005524///ATP binding+++GO:0003723///RNA binding	GO:0006955///immune response+++GO:0051607///defense response to virus
501668	Dmrtc1a	55.22	40.72	77.1	14.94	34.55	34.23	31.71	7.18	0.806656	2.40819e-06	2.23508e-05		GO:0005634///nucleus	GO:0003700///DNA-binding transcription factor activity+++GO:0042803///protein homodimerization activity	GO:0006355///regulation of transcription, DNA-templated
688913	Dcun1d2	263.85	157.64	87.01	212.97	178.2	128.17	107.22	0	0.805431	2.79571e-20	1.00842e-18		GO:0000151///ubiquitin ligase complex	GO:0031624///ubiquitin conjugating enzyme binding+++GO:0097602///cullin family protein binding+++GO:0032182///ubiquitin-like protein binding	GO:0045116///protein neddylation+++GO:0051443///positive regulation of ubiquitin-protein transferase activity
303384	Mmp28	37.99	67.72	47.66	57.26	14.19	57.92	29.92	18.72	0.805381	6.1965e-07	6.37216e-06		GO:0031012///extracellular matrix	GO:0008270///zinc ion binding+++GO:0004222///metalloendopeptidase activity+++GO:0016787///hydrolase activity+++GO:0008237///metallopeptidase activity+++GO:0008233///peptidase activity+++GO:0046872///metal ion binding	GO:0006508///proteolysis
24370	Foxg1	5.19	5.1	2.92	6.4	0	3.09	5.1	3.06	0.804358	0.128666	0.275764	04068///FoxO signaling pathway	GO:0005634///nucleus+++GO:0005575///cellular_component	GO:0043565///sequence-specific DNA binding+++GO:0003677///DNA binding+++GO:0003700///DNA-binding transcription factor activity+++GO:0003674///molecular_function	GO:0045892///negative regulation of transcription, DNA-templated+++GO:0007568///aging+++GO:0006355///regulation of transcription, DNA-templated+++GO:0007275///multicellular organism development+++GO:0007420///brain development
287136	Prss29	12	22	26	1	4	9	16	6	0.804148	0.00738108	0.0287352		GO:0005615///extracellular space	GO:0008236///serine-type peptidase activity+++GO:0004252///serine-type endopeptidase activity+++GO:0008233///peptidase activity+++GO:0016787///hydrolase activity	GO:0006508///proteolysis
24190	Aldob	11	8	8	6	6	3	4	6	0.79916	0.0499931	0.134956	01130///Biosynthesis of antibiotics+++01230///Biosynthesis of amino acids+++01100///Metabolic pathways+++00051///Fructose and mannose metabolism+++00030///Pentose phosphate pathway+++00680///Methane metabolism+++01120///Microbial metabolism in diverse environments+++00010///Glycolysis / Gluconeogenesis+++00710///Carbon fixation in photosynthetic organisms+++01200///Carbon metabolism+++01110///Bio…	GO:0030867///rough endoplasmic reticulum membrane+++GO:0048471///perinuclear region of cytoplasm+++GO:0005634///nucleus+++GO:0034451///centriolar satellite+++GO:0043231///intracellular membrane-bounded organelle+++GO:0005737///cytoplasm+++GO:0005815///microtubule organizing center+++GO:0030868///smooth endoplasmic reticulum membrane+++GO:0005856///cytoskeleton+++GO:0005829///cytosol+++GO:0005764/…	GO:0061609///fructose-1-phosphate aldolase activity+++GO:0004332///fructose-bisphosphate aldolase activity+++GO:0016829///lyase activity+++GO:0031210///phosphatidylcholine binding+++GO:0042802///identical protein binding+++GO:0003824///catalytic activity+++GO:0008092///cytoskeletal protein binding+++GO:0051117///ATPase binding+++GO:0070061///fructose binding	GO:0006000///fructose metabolic process+++GO:0001889///liver development+++GO:0042594///response to starvation+++GO:0031668///cellular response to extracellular stimulus+++GO:0009750///response to fructose+++GO:0006116///NADH oxidation+++GO:0032869///cellular response to insulin stimulus+++GO:0051384///response to glucocorticoid+++GO:0042493///response to drug+++GO:0046688///response to copper io…
679787	Clec5a	67.01	39.57	66.17	68.6	35.09	29	42.72	32.21	0.798528	1.17703e-07	1.36436e-06		GO:0016021///integral component of membrane+++GO:0016020///membrane+++GO:0009986///cell surface+++GO:0005829///cytosol+++GO:0005886///plasma membrane	GO:0005515///protein binding+++GO:0030246///carbohydrate binding+++GO:0001618///virus receptor activity	GO:0030099///myeloid cell differentiation+++GO:0045087///innate immune response+++GO:0002076///osteoblast development+++GO:0046718///viral entry into host cell+++GO:0033033///negative regulation of myeloid cell apoptotic process+++GO:0043066///negative regulation of apoptotic process+++GO:0050715///positive regulation of cytokine secretion
103691544	LOC103691544	0	3	0	0	0	0	1.73	0	0.796884	0.555514	0.734756		GO:0005634///nucleus+++GO:0016607///nuclear speck	GO:0000977///RNA polymerase II regulatory region sequence-specific DNA binding+++GO:0042803///protein homodimerization activity+++GO:0046872///metal ion binding+++GO:0003700///DNA-binding transcription factor activity+++GO:0001228///DNA-binding transcription activator activity, RNA polymerase II-specific+++GO:0003677///DNA binding	GO:0060039///pericardium development+++GO:0006954///inflammatory response+++GO:0009617///response to bacterium+++GO:0030154///cell differentiation+++GO:0051726///regulation of cell cycle+++GO:0090336///positive regulation of brown fat cell differentiation+++GO:0045893///positive regulation of transcription, DNA-templated+++GO:0001701///in utero embryonic development+++GO:0043069///negative regula…
100362113	LOC100362113	192.9	179.05	181.22	126.28	109.41	47.2	132.34	102.94	0.796612	7.3607e-19	2.49439e-17		GO:0005737///cytoplasm		GO:0006915///apoptotic process+++GO:0043066///negative regulation of apoptotic process+++GO:0050769///positive regulation of neurogenesis+++GO:0007249///I-kappaB kinase/NF-kappaB signaling
689081	LOC689081	5	7	11	3	3	4	4	4	0.796242	0.0828664	0.199973		GO:0005615///extracellular space	GO:0030414///peptidase inhibitor activity+++GO:0004869///cysteine-type endopeptidase inhibitor activity	GO:0010466///negative regulation of peptidase activity+++GO:0010951///negative regulation of endopeptidase activity
102555392	LOC102555392	0	1.06	0	6.13	0	0	0	4.15	0.795574	0.362111	0.558571		GO:0031965///nuclear membrane+++GO:0020005///symbiont-containing vacuole membrane+++GO:0005789///endoplasmic reticulum membrane+++GO:0032580///Golgi cisterna membrane	GO:0042802///identical protein binding+++GO:0019003///GDP binding+++GO:0005525///GTP binding+++GO:0003924///GTPase activity	GO:0045087///innate immune response+++GO:0009617///response to bacterium+++GO:0042832///defense response to protozoan+++GO:0010506///regulation of autophagy+++GO:0019221///cytokine-mediated signaling pathway+++GO:0050829///defense response to Gram-negative bacterium+++GO:0035458///cellular response to interferon-beta
103694226	LOC103694226	0	1.06	0	6.13	0	0	0	4.15	0.795574	0.362111	0.558571		GO:0005789///endoplasmic reticulum membrane+++GO:0016020///membrane	GO:0003924///GTPase activity+++GO:0005525///GTP binding	GO:0035458///cellular response to interferon-beta+++GO:0006952///defense response
360918	Pf4	49	23	32	17	19	15	17	19	0.792274	0.000195112	0.00121356	04060///Cytokine-cytokine receptor interaction+++04062///Chemokine signaling pathway	GO:0005615///extracellular space+++GO:0005576///extracellular region+++GO:0032991///protein-containing complex+++GO:0031091///platelet alpha granule+++GO:0031982///vesicle	GO:0003674///molecular_function+++GO:0008009///chemokine activity+++GO:0005125///cytokine activity+++GO:0008201///heparin binding+++GO:0048248///CXCR3 chemokine receptor binding	GO:0030168///platelet activation+++GO:0030595///leukocyte chemotaxis+++GO:0019221///cytokine-mediated signaling pathway+++GO:0065003///protein-containing complex assembly+++GO:0043950///positive regulation of cAMP-mediated signaling+++GO:0030593///neutrophil chemotaxis+++GO:0007189///adenylate cyclase-activating G protein-coupled receptor signaling pathway+++GO:0071222///cellular response to lipo…
25616	Rln1	7	5	4	3	1	2	1	7	0.791189	0.140363	0.293308	04926///Relaxin signaling pathway	GO:0005576///extracellular region	GO:0005179///hormone activity	GO:0007188///adenylate cyclase-modulating G protein-coupled receptor signaling pathway+++GO:0010469///regulation of signaling receptor activity+++GO:0043066///negative regulation of apoptotic process+++GO:0050878///regulation of body fluid levels+++GO:0010749///regulation of nitric oxide mediated signal transduction+++GO:0042127///regulation of cell proliferation
363458	Col4a6	11	5	10	12	4	4	6	8	0.791189	0.0370534	0.106422	04926///Relaxin signaling pathway+++04151///PI3K-Akt signaling pathway+++04974///Protein digestion and absorption+++04510///Focal adhesion+++04512///ECM-receptor interaction	GO:0005581///collagen trimer+++GO:0005575///cellular_component+++GO:0005615///extracellular space+++GO:0031012///extracellular matrix+++GO:0005604///basement membrane+++GO:0005587///collagen type IV trimer	GO:0003674///molecular_function+++GO:0005201///extracellular matrix structural constituent+++GO:0005198///structural molecule activity	GO:0030198///extracellular matrix organization+++GO:0038063///collagen-activated tyrosine kinase receptor signaling pathway+++GO:0071230///cellular response to amino acid stimulus+++GO:0008150///biological_process
681341	LOC681341	3	0	11.56	2.31	1.96	3	1	3.82	0.789247	0.165626	0.329505		GO:0016021///integral component of membrane+++GO:0005886///plasma membrane	GO:0042288///MHC class I protein binding	GO:0045671///negative regulation of osteoclast differentiation+++GO:0001773///myeloid dendritic cell activation+++GO:0007169///transmembrane receptor protein tyrosine kinase signaling pathway
108348812	LOC108348812	0	5.6	2.94	4.89	2.44	2.59	0	2.77	0.786607	0.217419	0.398801			GO:0003676///nucleic acid binding+++GO:0004523///RNA-DNA hybrid ribonuclease activity+++GO:0004190///aspartic-type endopeptidase activity	GO:0015074///DNA integration
113892	Nat8f3	248.39	195.27	131.17	299.6	100.52	119.74	153.05	134.7	0.786179	2.57436e-23	1.09195e-21	00480///Glutathione metabolism	GO:0031965///nuclear membrane+++GO:0005634///nucleus+++GO:0016020///membrane+++GO:0048471///perinuclear region of cytoplasm+++GO:0005737///cytoplasm+++GO:0016021///integral component of membrane	GO:0016746///transferase activity, transferring acyl groups+++GO:0004402///histone acetyltransferase activity+++GO:0008080///N-acetyltransferase activity+++GO:0016740///transferase activity	GO:0001702///gastrulation with mouth forming second+++GO:0016573///histone acetylation
24231	C2	398	493	805	437	220	322	376	322	0.785237	2.50159e-54	2.6322e-52	04610///Complement and coagulation cascades	GO:0005576///extracellular region+++GO:0005575///cellular_component	GO:0008233///peptidase activity+++GO:0016787///hydrolase activity+++GO:0004252///serine-type endopeptidase activity+++GO:0005515///protein binding+++GO:0008236///serine-type peptidase activity	GO:2000427///positive regulation of apoptotic cell clearance+++GO:0006958///complement activation, classical pathway+++GO:0007584///response to nutrient+++GO:0006956///complement activation+++GO:0006508///proteolysis
405349	Olr1737	2	1.5	1	0.66	0	0	3	0	0.785102	0.445301	0.638035	04740///Olfactory transduction	GO:0016020///membrane+++GO:0016021///integral component of membrane+++GO:0005886///plasma membrane	GO:0004984///olfactory receptor activity+++GO:0004930///G protein-coupled receptor activity	GO:0050896///response to stimulus+++GO:0007608///sensory perception of smell+++GO:0007186///G protein-coupled receptor signaling pathway+++GO:0050911///detection of chemical stimulus involved in sensory perception of smell+++GO:0007165///signal transduction
291760	Dsc2	12	15	14	14	2	10	13	7	0.784053	0.0128084	0.0454594		GO:0031410///cytoplasmic vesicle+++GO:0014704///intercalated disc+++GO:0016020///membrane+++GO:0030057///desmosome+++GO:0016021///integral component of membrane+++GO:0005913///cell-cell adherens junction+++GO:0005886///plasma membrane	GO:0005509///calcium ion binding	GO:0086091///regulation of heart rate by cardiac conduction+++GO:0086073///bundle of His cell-Purkinje myocyte adhesion involved in cell communication+++GO:0086042///cardiac muscle cell-cardiac muscle cell adhesion+++GO:0007156///homophilic cell adhesion via plasma membrane adhesion molecules+++GO:0009267///cellular response to starvation+++GO:0007155///cell adhesion+++GO:0098911///regulation of …
308350	Lilrb3	18	74	49	29	32	23	32	12	0.782728	1.24469e-05	0.000100233	04380///Osteoclast differentiation	GO:0030667///secretory granule membrane+++GO:0005886///plasma membrane+++GO:0016021///integral component of membrane+++GO:0005887///integral component of plasma membrane	GO:0004888///transmembrane signaling receptor activity+++GO:0038023///signaling receptor activity	GO:0043312///neutrophil degranulation+++GO:0045671///negative regulation of osteoclast differentiation+++GO:0006952///defense response+++GO:0007166///cell surface receptor signaling pathway+++GO:0002250///adaptive immune response
305269	Stap1	26.12	20.04	29.12	19.33	11.08	10.89	20.06	13.07	0.782634	0.00111637	0.00567723		GO:0032991///protein-containing complex+++GO:0043231///intracellular membrane-bounded organelle+++GO:0005739///mitochondrion+++GO:0005634///nucleus+++GO:0005654///nucleoplasm+++GO:0005737///cytoplasm	GO:0005068///transmembrane receptor protein tyrosine kinase adaptor activity+++GO:0005157///macrophage colony-stimulating factor receptor binding+++GO:0030971///receptor tyrosine kinase binding+++GO:0019901///protein kinase binding+++GO:0035591///signaling adaptor activity+++GO:0005070///SH3/SH2 adaptor activity+++GO:0001784///phosphotyrosine residue binding	GO:1902227///negative regulation of macrophage colony-stimulating factor signaling pathway+++GO:0060100///positive regulation of phagocytosis, engulfment+++GO:0071222///cellular response to lipopolysaccharide+++GO:1904140///negative regulation of microglial cell migration+++GO:1904151///positive regulation of microglial cell mediated cytotoxicity+++GO:0042326///negative regulation of phosphorylat…
309288	Rorb	10.9	5.11	11.09	12.7	6.05	1.98	5.09	10.06	0.782581	0.0345218	0.100684	04710///Circadian rhythm	GO:0005575///cellular_component+++GO:0005634///nucleus	GO:0000978///RNA polymerase II proximal promoter sequence-specific DNA binding+++GO:0008270///zinc ion binding+++GO:0003707///steroid hormone receptor activity+++GO:0008502///melatonin receptor activity+++GO:0001228///DNA-binding transcription activator activity, RNA polymerase II-specific+++GO:0046872///metal ion binding+++GO:0004879///nuclear receptor activity+++GO:0003677///DNA binding+++GO:00…	GO:0046548///retinal rod cell development+++GO:0007623///circadian rhythm+++GO:0030522///intracellular receptor signaling pathway+++GO:0045893///positive regulation of transcription, DNA-templated+++GO:0042752///regulation of circadian rhythm+++GO:0043401///steroid hormone mediated signaling pathway+++GO:0045892///negative regulation of transcription, DNA-templated+++GO:0007275///multicellular or…
29268	Tpsb2	7	18	50	16	13	17	16	7	0.782568	0.00139151	0.00689063		GO:0005576///extracellular region+++GO:0005615///extracellular space	GO:0008236///serine-type peptidase activity+++GO:0008233///peptidase activity+++GO:0016787///hydrolase activity+++GO:0004252///serine-type endopeptidase activity	GO:0006508///proteolysis
306889	RGD1564786	13	9.01	11	3	6	7	7	1	0.780702	0.0447945	0.124053		GO:0005737///cytoplasm+++GO:0005622///intracellular+++GO:0005615///extracellular space+++GO:0097180///serine protease inhibitor complex	GO:0002020///protease binding+++GO:0004867///serine-type endopeptidase inhibitor activity	GO:0010951///negative regulation of endopeptidase activity+++GO:0008406///gonad development+++GO:0007605///sensory perception of sound+++GO:0071470///cellular response to osmotic stress
100361444	Angptl8	1	4	4	3	0	3	0	4	0.780301	0.246936	0.435574	04979///Cholesterol metabolism	GO:0005576///extracellular region	GO:0005179///hormone activity	GO:0050746///regulation of lipoprotein metabolic process+++GO:0070328///triglyceride homeostasis+++GO:0044255///cellular lipid metabolic process+++GO:0010954///positive regulation of protein processing+++GO:0019216///regulation of lipid metabolic process+++GO:0048469///cell maturation+++GO:0045444///fat cell differentiation
117064	Vip	3	1	5	3	0	3	2	2	0.780301	0.246936	0.435574		GO:0043025///neuronal cell body+++GO:0043005///neuron projection+++GO:0005576///extracellular region+++GO:0043204///perikaryon	GO:0005102///signaling receptor binding+++GO:0005184///neuropeptide hormone activity+++GO:0005179///hormone activity+++GO:0051428///peptide hormone receptor binding	GO:0043267///negative regulation of potassium ion transport+++GO:0010469///regulation of signaling receptor activity+++GO:0007611///learning or memory+++GO:0032880///regulation of protein localization+++GO:0060406///positive regulation of penile erection+++GO:0007189///adenylate cyclase-activating G protein-coupled receptor signaling pathway+++GO:0051930///regulation of sensory perception of pain…
360417	Ptprq	1	3	5	3	1	4	2	0	0.780301	0.246936	0.435574		GO:0016020///membrane+++GO:0032421///stereocilium bundle+++GO:0016021///integral component of membrane+++GO:0005886///plasma membrane	GO:0016791///phosphatase activity+++GO:0016787///hydrolase activity+++GO:0004721///phosphoprotein phosphatase activity+++GO:0004725///protein tyrosine phosphatase activity	GO:0002244///hematopoietic progenitor cell differentiation+++GO:0016311///dephosphorylation+++GO:0045598///regulation of fat cell differentiation+++GO:0050885///neuromuscular process controlling balance+++GO:0042472///inner ear morphogenesis+++GO:0035335///peptidyl-tyrosine dephosphorylation+++GO:0006470///protein dephosphorylation+++GO:0050910///detection of mechanical stimulus involved in senso…
690393	Tex12	11.6	14.99	19.09	18.93	4.01	4.01	9.43	20.26	0.779504	0.00726995	0.0283838		GO:0000801///central element+++GO:0000795///synaptonemal complex		GO:0007130///synaptonemal complex assembly+++GO:0000711///meiotic DNA repair synthesis
685025	LOC685025	25.69	9.62	9.09	19.83	10.76	10.12	5.41	11.2	0.779435	0.00744824	0.0289257	01110///Biosynthesis of secondary metabolites	GO:0005737///cytoplasm+++GO:0005654///nucleoplasm+++GO:0005730///nucleolus	GO:0035198///miRNA binding+++GO:0097322///7SK snRNA binding+++GO:0005524///ATP binding+++GO:0004004///ATP-dependent RNA helicase activity+++GO:0019843///rRNA binding+++GO:0030515///snoRNA binding	GO:0006366///transcription by RNA polymerase II+++GO:0010501///RNA secondary structure unwinding+++GO:0006364///rRNA processing
25432	Drd4	2	1	3.09	3.4	1.25	2.07	2.22	0	0.779215	0.303762	0.500835	04728///Dopaminergic synapse+++04080///Neuroactive ligand-receptor interaction	GO:0043025///neuronal cell body+++GO:0098794///postsynapse+++GO:0012506///vesicle membrane+++GO:0016021///integral component of membrane+++GO:0016020///membrane+++GO:0005938///cell cortex+++GO:0030424///axon+++GO:0005886///plasma membrane+++GO:0098982///GABA-ergic synapse+++GO:0005737///cytoplasm+++GO:0005887///integral component of plasma membrane+++GO:0043679///axon terminus+++GO:0030425///dend…	GO:0017124///SH3 domain binding+++GO:0035240///dopamine binding+++GO:0046872///metal ion binding+++GO:0030594///neurotransmitter receptor activity+++GO:0001591///dopamine neurotransmitter receptor activity, coupled via Gi/Go+++GO:0008144///drug binding+++GO:0042802///identical protein binding+++GO:0005515///protein binding+++GO:0004930///G protein-coupled receptor activity+++GO:0004993///G protei…	GO:0050709///negative regulation of protein secretion+++GO:0008344///adult locomotory behavior+++GO:0007195///adenylate cyclase-inhibiting dopamine receptor signaling pathway+++GO:1904706///negative regulation of vascular smooth muscle cell proliferation+++GO:0099149///regulation of postsynaptic neurotransmitter receptor internalization+++GO:0007623///circadian rhythm+++GO:0042053///regulation of…
116487	Tgfbi	1896	2518	3532	2828	1106	1339	1932	1923	0.776824	9.72144e-262	4.62862e-259		GO:0005615///extracellular space+++GO:0005802///trans-Golgi network+++GO:0031012///extracellular matrix+++GO:0005604///basement membrane	GO:0005178///integrin binding+++GO:0050840///extracellular matrix binding+++GO:0005518///collagen binding+++GO:0050839///cell adhesion molecule binding+++GO:0003674///molecular_function	GO:0008283///cell proliferation+++GO:0007155///cell adhesion+++GO:0030198///extracellular matrix organization+++GO:0001525///angiogenesis+++GO:0002062///chondrocyte differentiation
313504	Foxd2	143.95	124	166.3	141.91	61	57.56	85.85	132.77	0.775644	1.4476e-15	4.01889e-14		GO:0005634///nucleus	GO:0043565///sequence-specific DNA binding+++GO:0003700///DNA-binding transcription factor activity+++GO:0000981///DNA-binding transcription factor activity, RNA polymerase II-specific+++GO:0003677///DNA binding	GO:0045944///positive regulation of transcription by RNA polymerase II+++GO:0009653///anatomical structure morphogenesis+++GO:0006355///regulation of transcription, DNA-templated+++GO:0030154///cell differentiation+++GO:0006357///regulation of transcription by RNA polymerase II
292301	Tbxt	11	6	16	8	3	6	7	8	0.775283	0.0333176	0.0979899		GO:0005634///nucleus+++GO:0005575///cellular_component+++GO:0000790///nuclear chromatin+++GO:0000785///chromatin+++GO:0005737///cytoplasm	GO:0003674///molecular_function+++GO:0000981///DNA-binding transcription factor activity, RNA polymerase II-specific+++GO:0001102///RNA polymerase II activating transcription factor binding+++GO:0043565///sequence-specific DNA binding+++GO:0000978///RNA polymerase II proximal promoter sequence-specific DNA binding+++GO:0001085///RNA polymerase II transcription factor binding+++GO:0003677///DNA bi…	GO:0022414///reproductive process+++GO:0030509///BMP signaling pathway+++GO:0061371///determination of heart left/right asymmetry+++GO:0014028///notochord formation+++GO:0045944///positive regulation of transcription by RNA polymerase II+++GO:0008284///positive regulation of cell proliferation+++GO:0001839///neural plate morphogenesis+++GO:0003007///heart morphogenesis+++GO:0000122///negative reg…
689210	Spdef	11	7	16	7	11	4	4	5	0.775283	0.0333176	0.0979899		GO:0005634///nucleus	GO:0000981///DNA-binding transcription factor activity, RNA polymerase II-specific+++GO:0043565///sequence-specific DNA binding+++GO:0003677///DNA binding+++GO:0003700///DNA-binding transcription factor activity	GO:0006355///regulation of transcription, DNA-templated+++GO:0043065///positive regulation of apoptotic process+++GO:0045944///positive regulation of transcription by RNA polymerase II+++GO:0000122///negative regulation of transcription by RNA polymerase II+++GO:0006357///regulation of transcription by RNA polymerase II+++GO:0060576///intestinal epithelial cell development+++GO:0060480///lung gob…
100912068	LOC100912068	66.86	61.2	75.46	63.55	27.13	31.13	60.15	38	0.774579	5.71521e-08	6.889e-07		GO:0005634///nucleus	GO:0003700///DNA-binding transcription factor activity+++GO:0003676///nucleic acid binding	GO:0006974///cellular response to DNA damage stimulus+++GO:0008630///intrinsic apoptotic signaling pathway in response to DNA damage+++GO:0000122///negative regulation of transcription by RNA polymerase II
366452	Ptch2	157	177	234	238	64	91	161	157	0.771633	5.57611e-21	2.09876e-19		GO:0016021///integral component of membrane	GO:0097108///hedgehog family protein binding+++GO:0008158///hedgehog receptor activity+++GO:0005119///smoothened binding	GO:0001709///cell fate determination+++GO:0043588///skin development+++GO:0042633///hair cycle+++GO:0045606///positive regulation of epidermal cell differentiation+++GO:0009957///epidermal cell fate specification+++GO:0008544///epidermis development
100911796	LOC100911796	11.31	5.56	10.91	2.1	1	10.02	3.95	2.58	0.770402	0.0707723	0.17714	04071///Sphingolipid signaling pathway+++04022///cGMP-PKG signaling pathway+++04080///Neuroactive ligand-receptor interaction	GO:0016021///integral component of membrane+++GO:0042734///presynaptic membrane	GO:0001609///G protein-coupled adenosine receptor activity	GO:0007186///G protein-coupled receptor signaling pathway+++GO:0014061///regulation of norepinephrine secretion
689458	LOC689458	9.74	9	8	8	7	3.2	5	5.22	0.769308	0.0516604	0.138165		GO:0016021///integral component of membrane+++GO:0016020///membrane
293591	Scart1	3	2	6	6	0	2	6	2	0.768228	0.173955	0.341262		GO:0016020///membrane+++GO:0009897///external side of plasma membrane+++GO:0005886///plasma membrane	GO:0005044///scavenger receptor activity	GO:0006898///receptor-mediated endocytosis
25236	Gpc3	1139	1525	2631	1888	537	958	1538	1193	0.767987	8.51168e-172	2.65746e-169		GO:0031225///anchored component of membrane+++GO:0046658///anchored component of plasma membrane+++GO:0005575///cellular_component+++GO:0062023///collagen-containing extracellular matrix+++GO:0016020///membrane+++GO:0005886///plasma membrane+++GO:0005764///lysosome	GO:0003674///molecular_function+++GO:0060422///peptidyl-dipeptidase inhibitor activity+++GO:0030414///peptidase inhibitor activity	GO:0010466///negative regulation of peptidase activity+++GO:0042074///cell migration involved in gastrulation+++GO:0072180///mesonephric duct morphogenesis+++GO:0072203///cell proliferation involved in metanephros development+++GO:0010171///body morphogenesis+++GO:0045926///negative regulation of growth+++GO:0090263///positive regulation of canonical Wnt signaling pathway+++GO:0035116///embryonic…
100361947	Zfp42	3.3	6.26	2.47	3.33	2.71	0.37	3.39	2.57	0.767477	0.196611	0.371143		GO:0005737///cytoplasm+++GO:0032991///protein-containing complex+++GO:0005634///nucleus	GO:0000978///RNA polymerase II proximal promoter sequence-specific DNA binding+++GO:0046872///metal ion binding+++GO:0001077///proximal promoter DNA-binding transcription activator activity, RNA polymerase II-specific+++GO:0043565///sequence-specific DNA binding	GO:0045944///positive regulation of transcription by RNA polymerase II+++GO:0007286///spermatid development+++GO:1990830///cellular response to leukemia inhibitory factor+++GO:2000653///regulation of genetic imprinting+++GO:0001701///in utero embryonic development
246266	Aspg	36	74	97	34	19	46	47	30	0.765836	3.30235e-07	3.55932e-06			GO:0016787///hydrolase activity+++GO:0003847///1-alkyl-2-acetylglycerophosphocholine esterase activity+++GO:0004622///lysophospholipase activity+++GO:0004067///asparaginase activity	GO:0006629///lipid metabolic process+++GO:0006644///phospholipid metabolic process+++GO:0006528///asparagine metabolic process+++GO:0016042///lipid catabolic process+++GO:0006520///cellular amino acid metabolic process
298605	Tmem82	11	12	11	5	11	5	4	3	0.764534	0.0402947	0.113944		GO:0016021///integral component of membrane+++GO:0016020///membrane
29139	Dcn	15622	16782	22653	17216	6427	8904	14791	12546	0.762996	0	0	04350///TGF-beta signaling pathway	GO:0031012///extracellular matrix+++GO:0005576///extracellular region+++GO:0005589///collagen type VI trimer	GO:0047485///protein N-terminus binding+++GO:0005518///collagen binding+++GO:0005539///glycosaminoglycan binding+++GO:0050840///extracellular matrix binding	GO:0032496///response to lipopolysaccharide+++GO:0009612///response to mechanical stimulus+++GO:0014068///positive regulation of phosphatidylinositol 3-kinase signaling+++GO:0007519///skeletal muscle tissue development+++GO:0019800///peptide cross-linking via chondroitin 4-sulfate glycosaminoglycan+++GO:0016525///negative regulation of angiogenesis+++GO:0042060///wound healing+++GO:0001822///kidn…
108348208	LOC108348208	9.06	6.11	12.36	8.36	4.19	7.29	3.19	6.53	0.762211	0.049755	0.134466		GO:0005829///cytosol+++GO:0005737///cytoplasm+++GO:0005634///nucleus+++GO:0005783///endoplasmic reticulum	GO:0008289///lipid binding+++GO:0019841///retinol binding+++GO:0001972///retinoic acid binding+++GO:0016918///retinal binding	GO:0048672///positive regulation of collateral sprouting+++GO:0042573///retinoic acid metabolic process+++GO:0048385///regulation of retinoic acid receptor signaling pathway+++GO:0006869///lipid transport+++GO:0002138///retinoic acid biosynthetic process+++GO:0035115///embryonic forelimb morphogenesis
102547257	LOC102547257	8.88	5.8	1.09	3.36	2.31	1.12	2.37	5.5	0.762207	0.152013	0.309535		GO:0016020///membrane+++GO:0005783///endoplasmic reticulum+++GO:0048471///perinuclear region of cytoplasm+++GO:0031985///Golgi cisterna+++GO:0005641///nuclear envelope lumen+++GO:0005768///endosome+++GO:0016021///integral component of membrane+++GO:0005802///trans-Golgi network+++GO:0043025///neuronal cell body+++GO:0005615///extracellular space+++GO:0005769///early endosome+++GO:0034362///low-de…	GO:0030306///ADP-ribosylation factor binding+++GO:0001540///amyloid-beta binding+++GO:0030169///low-density lipoprotein particle binding	GO:0014910///regulation of smooth muscle cell migration+++GO:0006605///protein targeting+++GO:0034067///protein localization to Golgi apparatus+++GO:1902997///negative regulation of neurofibrillary tangle assembly+++GO:2001137///positive regulation of endocytic recycling+++GO:1902430///negative regulation of amyloid-beta formation+++GO:0051604///protein maturation+++GO:0050768///negative regulati…
293154	Folr2	94	110	211	81	46	61	96	90	0.762133	3.02243e-13	6.82824e-12	04144///Endocytosis	GO:0009986///cell surface+++GO:0005575///cellular_component+++GO:0031362///anchored component of external side of plasma membrane	GO:0038023///signaling receptor activity+++GO:0051870///methotrexate binding+++GO:0061714///folic acid receptor activity+++GO:0003674///molecular_function+++GO:0008144///drug binding+++GO:0005542///folic acid binding	GO:0007342///fusion of sperm to egg plasma membrane involved in single fertilization+++GO:0071231///cellular response to folic acid+++GO:0008284///positive regulation of cell proliferation+++GO:0007155///cell adhesion+++GO:0008150///biological_process+++GO:0035036///sperm-egg recognition+++GO:1904447///folate import across plasma membrane+++GO:0015884///folic acid transport
102547688	LOC102547688	20.2	8.68	8.79	9.17	9.6	2.45	6.2	9.42	0.762112	0.0250114	0.0781016		GO:0005634///nucleus	GO:0000978///RNA polymerase II proximal promoter sequence-specific DNA binding+++GO:0042826///histone deacetylase binding+++GO:0003682///chromatin binding+++GO:0046872///metal ion binding	GO:0030154///cell differentiation+++GO:0045668///negative regulation of osteoblast differentiation+++GO:0000122///negative regulation of transcription by RNA polymerase II+++GO:0006351///transcription, DNA-templated+++GO:0043433///negative regulation of DNA-binding transcription factor activity
117027	Ccr3	6	4	12	0	4	4	2	3	0.761685	0.124724	0.269836	04060///Cytokine-cytokine receptor interaction+++04062///Chemokine signaling pathway	GO:0009897///external side of plasma membrane+++GO:0016020///membrane+++GO:0005886///plasma membrane+++GO:0005737///cytoplasm+++GO:0005768///endosome+++GO:0016021///integral component of membrane+++GO:0005615///extracellular space	GO:0004930///G protein-coupled receptor activity+++GO:0004950///chemokine receptor activity+++GO:0016493///C-C chemokine receptor activity+++GO:0019957///C-C chemokine binding+++GO:0019956///chemokine binding	GO:0007204///positive regulation of cytosolic calcium ion concentration+++GO:0006935///chemotaxis+++GO:0035476///angioblast cell migration+++GO:0002551///mast cell chemotaxis+++GO:0045766///positive regulation of angiogenesis+++GO:0019722///calcium-mediated signaling+++GO:0070098///chemokine-mediated signaling pathway+++GO:0048245///eosinophil chemotaxis+++GO:0007165///signal transduction+++GO:00…
501570	RGD1565785	12	14	11	7	7	5	6	8	0.761685	0.0299188	0.089931
497796	LOC497796	13.46	5.82	1.82	1.1	5.21	0	7.91	0	0.761485	0.123109	0.267466		GO:0016021///integral component of membrane+++GO:0016020///membrane	GO:0030246///carbohydrate binding	GO:0007155///cell adhesion
685357	Baiap2l2	23	18	21	9	7	14	11	10	0.760123	0.00590344	0.02381		GO:0005829///cytosol+++GO:0071439///clathrin complex+++GO:0005654///nucleoplasm+++GO:0015629///actin cytoskeleton+++GO:0044291///cell-cell contact zone+++GO:0012506///vesicle membrane	GO:0005543///phospholipid binding	GO:0007009///plasma membrane organization+++GO:0051764///actin crosslink formation+++GO:0051017///actin filament bundle assembly+++GO:0061024///membrane organization+++GO:0030838///positive regulation of actin filament polymerization+++GO:2000251///positive regulation of actin cytoskeleton reorganization
108348044	LOC108348044	37.12	42	89.86	37.12	21	33	30	38	0.759157	2.79337e-06	2.5626e-05	04014///Ras signaling pathway	GO:0005737///cytoplasm+++GO:0005856///cytoskeleton+++GO:0016020///membrane	GO:0005096///GTPase activator activity	GO:0007165///signal transduction
100909455	LOC100909455	45.18	23.29	51.11	27.63	11.05	21.62	10.98	43.71	0.755524	8.03316e-05	0.000545424		GO:0005737///cytoplasm+++GO:0005829///cytosol+++GO:0005654///nucleoplasm+++GO:0005634///nucleus	GO:0008140///cAMP response element binding protein binding	GO:0050995///negative regulation of lipid catabolic process+++GO:0045944///positive regulation of transcription by RNA polymerase II+++GO:0097009///energy homeostasis+++GO:0043951///negative regulation of cAMP-mediated signaling+++GO:0042116///macrophage activation+++GO:0006351///transcription, DNA-templated+++GO:0051289///protein homotetramerization+++GO:0032793///positive regulation of CREB tra…
293744	Ms4a7	20	24	31	21	8	11	18	20	0.754766	0.00146412	0.00721081		GO:0016020///membrane+++GO:0016021///integral component of membrane
309666	Ubash3a	44	9	38	37	11	18	24	23	0.754766	0.000238863	0.00146181		GO:0005654///nucleoplasm+++GO:0005794///Golgi apparatus	GO:0016791///phosphatase activity	GO:0050860///negative regulation of T cell receptor signaling pathway+++GO:0001817///regulation of cytokine production+++GO:0009968///negative regulation of signal transduction+++GO:0016311///dephosphorylation
108349172	LOC108349172	1	1.03	1	0	0	0	1.8	0	0.754014	0.572233	0.741322		GO:0005634///nucleus	GO:0000978///RNA polymerase II proximal promoter sequence-specific DNA binding+++GO:0046872///metal ion binding+++GO:0003682///chromatin binding+++GO:0042826///histone deacetylase binding	GO:0045668///negative regulation of osteoblast differentiation+++GO:0000122///negative regulation of transcription by RNA polymerase II+++GO:0006351///transcription, DNA-templated+++GO:0030154///cell differentiation+++GO:0043433///negative regulation of DNA-binding transcription factor activity
298861	Ptrhd1	411.13	262.53	291.13	270.28	237.97	133.42	173.45	189.16	0.753434	4.4399e-30	2.5166e-28			GO:0004045///aminoacyl-tRNA hydrolase activity
301227	Trem2	81	105	168	73	60	45	67	82	0.752101	2.23713e-11	4.18117e-10	04380///Osteoclast differentiation	GO:0005886///plasma membrane+++GO:0016021///integral component of membrane	GO:0097110///scaffold protein binding+++GO:0005543///phospholipid binding	GO:0050850///positive regulation of calcium-mediated signaling+++GO:0050731///positive regulation of peptidyl-tyrosine phosphorylation+++GO:0097028///dendritic cell differentiation+++GO:0030316///osteoclast differentiation+++GO:0002588///positive regulation of antigen processing and presentation of peptide antigen via MHC class II+++GO:1903082///positive regulation of C-C chemokine receptor CCR7 …
116649	Kcnj4	26	34	42	14	19	16.99	7	26.03	0.751732	0.000491707	0.00276322	04921///Oxytocin signaling pathway+++04725///Cholinergic synapse	GO:0030425///dendrite+++GO:0016020///membrane+++GO:0045211///postsynaptic membrane+++GO:0030054///cell junction+++GO:0030659///cytoplasmic vesicle membrane+++GO:0043025///neuronal cell body+++GO:0016021///integral component of membrane+++GO:0016323///basolateral plasma membrane+++GO:0031410///cytoplasmic vesicle+++GO:0045202///synapse+++GO:0005886///plasma membrane	GO:0005244///voltage-gated ion channel activity+++GO:0030165///PDZ domain binding+++GO:0005242///inward rectifier potassium channel activity	GO:0034220///ion transmembrane transport+++GO:0034765///regulation of ion transmembrane transport+++GO:0071260///cellular response to mechanical stimulus+++GO:0071805///potassium ion transmembrane transport+++GO:1990573///potassium ion import across plasma membrane+++GO:0006813///potassium ion transport+++GO:0006811///ion transport
306454	Cldn22	53.13	22.02	34	32.8	9.47	16.45	33.3	25.4	0.749006	0.000121418	0.000792464	04670///Leukocyte transendothelial migration+++04530///Tight junction+++04514///Cell adhesion molecules (CAMs)	GO:0016021///integral component of membrane+++GO:0030054///cell junction+++GO:0016020///membrane+++GO:0005886///plasma membrane+++GO:0005923///bicellular tight junction	GO:0005198///structural molecule activity	GO:0016338///calcium-independent cell-cell adhesion via plasma membrane cell-adhesion molecules
102546424	LOC102546424	23.15	18.32	30.55	18.58	7.3	14.65	17.38	14.7	0.748444	0.00215215	0.0100732			GO:0004519///endonuclease activity+++GO:0003964///RNA-directed DNA polymerase activity	GO:0019068///virion assembly+++GO:0015074///DNA integration
24653	Pla2g4a	37	39	92	55	28	21	56	27.99	0.748419	1.48096e-06	1.42665e-05	04664///Fc epsilon RI signaling pathway+++00592///alpha-Linolenic acid metabolism+++04014///Ras signaling pathway+++00565///Ether lipid metabolism+++04010///MAPK signaling pathway+++04730///Long-term depression+++04270///Vascular smooth muscle contraction+++04913///Ovarian steroidogenesis+++04724///Glutamatergic synapse+++04750///Inflammatory mediator regulation of TRP channels+++04217///Necropto…	GO:0031410///cytoplasmic vesicle+++GO:0005829///cytosol+++GO:0005794///Golgi apparatus+++GO:0048471///perinuclear region of cytoplasm+++GO:0005783///endoplasmic reticulum+++GO:0005634///nucleus+++GO:0005811///lipid droplet+++GO:0005737///cytoplasm+++GO:0042588///zymogen granule+++GO:0043231///intracellular membrane-bounded organelle	GO:0004620///phospholipase activity+++GO:0005509///calcium ion binding+++GO:0102567///phospholipase A2 activity (consuming 1,2-dipalmitoylphosphatidylcholine)+++GO:0046872///metal ion binding+++GO:0004622///lysophospholipase activity+++GO:0016787///hydrolase activity+++GO:0102568///phospholipase A2 activity consuming 1,2-dioleoylphosphatidylethanolamine)+++GO:0004623///phospholipase A2 activity++…	GO:0043065///positive regulation of apoptotic process+++GO:0050729///positive regulation of inflammatory response+++GO:0007568///aging+++GO:0009395///phospholipid catabolic process+++GO:0030501///positive regulation of bone mineralization+++GO:0043129///surfactant homeostasis+++GO:0046475///glycerophospholipid catabolic process+++GO:0051384///response to glucocorticoid+++GO:0009408///response to …
681092	Pou6f2	19	17	21	14	9.35	9	10	14	0.74815	0.00662036	0.0263005		GO:0005634///nucleus	GO:0003700///DNA-binding transcription factor activity	GO:0007275///multicellular organism development+++GO:0006355///regulation of transcription, DNA-templated+++GO:0006366///transcription by RNA polymerase II
89829	Socs3	142	176	325	309	145	153	117	153	0.747764	2.82876e-23	1.19719e-21	04920///Adipocytokine signaling pathway+++04630///Jak-STAT signaling pathway+++04120///Ubiquitin mediated proteolysis+++04380///Osteoclast differentiation+++04917///Prolactin signaling pathway+++04910///Insulin signaling pathway+++04668///TNF signaling pathway	GO:0005737///cytoplasm	GO:0001784///phosphotyrosine residue binding	GO:0032570///response to progesterone+++GO:0007165///signal transduction+++GO:0009968///negative regulation of signal transduction+++GO:0032094///response to food+++GO:0060708///spongiotrophoblast differentiation+++GO:0001932///regulation of protein phosphorylation+++GO:0043066///negative regulation of apoptotic process+++GO:0046627///negative regulation of insulin receptor signaling pathway+++GO…
689257	Adgrd1	178	124	216	157	68	97	101	137	0.746801	6.30986e-17	1.91967e-15		GO:0005887///integral component of plasma membrane+++GO:0016020///membrane+++GO:0016021///integral component of membrane+++GO:0005886///plasma membrane	GO:0004888///transmembrane signaling receptor activity+++GO:0004930///G protein-coupled receptor activity	GO:0007186///G protein-coupled receptor signaling pathway+++GO:0007166///cell surface receptor signaling pathway+++GO:0007189///adenylate cyclase-activating G protein-coupled receptor signaling pathway
313831	Vit	243	334	491	374	118	209	292	242	0.746679	2.54361e-34	1.68205e-32		GO:0031012///extracellular matrix+++GO:0062023///collagen-containing extracellular matrix+++GO:0005615///extracellular space+++GO:0005614///interstitial matrix	GO:0005539///glycosaminoglycan binding	GO:0030198///extracellular matrix organization+++GO:0003429///growth plate cartilage chondrocyte morphogenesis+++GO:0021510///spinal cord development+++GO:0010811///positive regulation of cell-substrate adhesion
295279	Fcgr1a	103	103	137	114	58	46	80	89	0.745987	6.34544e-12	1.25623e-10	04640///Hematopoietic cell lineage+++04145///Phagosome+++04666///Fc gamma R-mediated phagocytosis+++04380///Osteoclast differentiation	GO:0016020///membrane+++GO:0016021///integral component of membrane+++GO:0045121///membrane raft	GO:0031774///leukotriene receptor binding+++GO:0005515///protein binding	GO:0071871///response to epinephrine+++GO:0060100///positive regulation of phagocytosis, engulfment+++GO:0032355///response to estradiol
448830	Ly96	72.02	38.3	58.75	56.3	32.42	30.53	37.12	34.59	0.745667	1.40844e-06	1.36299e-05	04620///Toll-like receptor signaling pathway+++04064///NF-kappa B signaling pathway	GO:0046696///lipopolysaccharide receptor complex+++GO:0031226///intrinsic component of plasma membrane+++GO:0005615///extracellular space	GO:0035662///Toll-like receptor 4 binding+++GO:0001530///lipopolysaccharide binding	GO:0045087///innate immune response
108348113	Egfl1	14.04	11.42	11.04	37.63	12.59	11.84	6.7	13.19	0.744793	0.00571458	0.0231661	04012///ErbB signaling pathway+++04015///Rap1 signaling pathway+++04072///Phospholipase D signaling pathway+++04010///MAPK signaling pathway+++04068///FoxO signaling pathway+++04510///Focal adhesion+++04014///Ras signaling pathway+++04151///PI3K-Akt signaling pathway+++04540///Gap junction+++04630///Jak-STAT signaling pathway+++04810///Regulation of actin cytoskeleton+++04066///HIF-1 signaling pa…	GO:0043235///receptor complex+++GO:0005886///plasma membrane+++GO:0005622///intracellular+++GO:0005615///extracellular space+++GO:0016021///integral component of membrane	GO:0042813///Wnt-activated receptor activity+++GO:0017147///Wnt-protein binding+++GO:0005154///epidermal growth factor receptor binding+++GO:0008083///growth factor activity+++GO:0005509///calcium ion binding	GO:2000573///positive regulation of DNA biosynthetic process+++GO:0043388///positive regulation of DNA binding+++GO:0044332///Wnt signaling pathway involved in dorsal/ventral axis specification+++GO:0060059///embryonic retina morphogenesis in camera-type eye+++GO:0046425///regulation of JAK-STAT cascade+++GO:0035556///intracellular signal transduction+++GO:0001822///kidney development+++GO:006007…
25021	Itgam	79.17	100.74	215	58	67.02	53	86	65	0.743518	9.0324e-12	1.76796e-10	04145///Phagosome+++04810///Regulation of actin cytoskeleton+++04514///Cell adhesion molecules (CAMs)+++04015///Rap1 signaling pathway+++04670///Leukocyte transendothelial migration+++04610///Complement and coagulation cascades+++04640///Hematopoietic cell lineage	GO:0016020///membrane+++GO:0008305///integrin complex+++GO:0016021///integral component of membrane	GO:0046982///protein heterodimerization activity	GO:0007229///integrin-mediated signaling pathway+++GO:0007155///cell adhesion
407760	Krt86	2	0	3.68	1	1	0	1	2	0.742541	0.407984	0.604861		GO:0005882///intermediate filament+++GO:0005575///cellular_component+++GO:0045095///keratin filament	GO:0005198///structural molecule activity+++GO:0003674///molecular_function	GO:0008150///biological_process
108351105	LOC108351105	54.82	60	78	90	19	24.43	64.15	62	0.740611	7.79386e-08	9.25399e-07
103690152	LOC103690152	12.22	12.46	4.49	13.69	6.23	13.25	6.23	0	0.739996	0.0366472	0.105525		GO:0030424///axon+++GO:0043005///neuron projection+++GO:0043025///neuronal cell body+++GO:0016021///integral component of membrane	GO:0004222///metalloendopeptidase activity+++GO:0046872///metal ion binding	GO:0007229///integrin-mediated signaling pathway
102551208	Tctex1d4	1	1	2	1	1	0	0	2	0.739659	0.475566	0.665502		GO:0036126///sperm flagellum+++GO:0005930///axoneme+++GO:0001669///acrosomal vesicle+++GO:0005634///nucleus+++GO:0005815///microtubule organizing center+++GO:0005737///cytoplasm	GO:0008157///protein phosphatase 1 binding
102555817	LOC102555817	0	0	2	3	0	3	0	0	0.739659	0.475566	0.665502
103692827	LOC103692827	0	0	1	4	1	1	1	0	0.739659	0.475566	0.665502		GO:0016021///integral component of membrane
108348722	LOC108348722	0	0	3	2	0	1	1	1	0.739659	0.475566	0.665502
108351813	LOC108351813	3	3	5	4	1	3	4	1	0.739659	0.216557	0.397851		GO:0005886///plasma membrane	GO:0003887///DNA-directed DNA polymerase activity+++GO:0004523///RNA-DNA hybrid ribonuclease activity+++GO:0005198///structural molecule activity+++GO:0008270///zinc ion binding+++GO:0003723///RNA binding+++GO:0003964///RNA-directed DNA polymerase activity+++GO:0004190///aspartic-type endopeptidase activity	GO:0016032///viral process
24443	Hdc	18	30	36	11	14	19	12	12	0.739659	0.00187171	0.00893179	01110///Biosynthesis of secondary metabolites+++01100///Metabolic pathways+++00340///Histidine metabolism	GO:0005829///cytosol+++GO:0043025///neuronal cell body+++GO:0030425///dendrite	GO:0016831///carboxy-lyase activity+++GO:0042803///protein homodimerization activity+++GO:0004398///histidine decarboxylase activity+++GO:0030170///pyridoxal phosphate binding+++GO:0016829///lyase activity+++GO:0016597///amino acid binding+++GO:0003824///catalytic activity	GO:0042423///catecholamine biosynthetic process+++GO:0006547///histidine metabolic process+++GO:0019752///carboxylic acid metabolic process+++GO:0006520///cellular amino acid metabolic process+++GO:0001692///histamine metabolic process+++GO:0001694///histamine biosynthetic process+++GO:0006548///histidine catabolic process
25069	Tnfrsf8	2	2	3	3	1	3	2	0	0.739659	0.312987	0.507954	04060///Cytokine-cytokine receptor interaction	GO:0016021///integral component of membrane+++GO:0016020///membrane+++GO:0005575///cellular_component	GO:0004888///transmembrane signaling receptor activity+++GO:0003674///molecular_function	GO:0071260///cellular response to mechanical stimulus+++GO:0042535///positive regulation of tumor necrosis factor biosynthetic process+++GO:0043065///positive regulation of apoptotic process+++GO:0007165///signal transduction+++GO:0045556///positive regulation of TRAIL biosynthetic process+++GO:0051092///positive regulation of NF-kappaB transcription factor activity
25294	Azgp1	4	5	3	8	3	3	4	2	0.739659	0.153607	0.311832	04514///Cell adhesion molecules (CAMs)+++04144///Endocytosis+++04612///Antigen processing and presentation+++04145///Phagosome+++04218///Cellular senescence	GO:0005886///plasma membrane+++GO:0005576///extracellular region+++GO:0005615///extracellular space		GO:0006955///immune response+++GO:0007155///cell adhesion+++GO:0001580///detection of chemical stimulus involved in sensory perception of bitter taste
290595	LOC290595	2	0	0	3	1	1	0	1	0.739659	0.475566	0.665502		GO:0005576///extracellular region+++GO:0005615///extracellular space	GO:0008009///chemokine activity+++GO:0005125///cytokine activity+++GO:0001664///G protein-coupled receptor binding	GO:0007186///G protein-coupled receptor signaling pathway+++GO:0010469///regulation of signaling receptor activity+++GO:0042742///defense response to bacterium+++GO:0048247///lymphocyte chemotaxis+++GO:2000404///regulation of T cell migration+++GO:0006935///chemotaxis
301266	Adgrf1	4	0	4	2	1	1	2	2	0.739659	0.312987	0.507954		GO:0016021///integral component of membrane+++GO:0005622///intracellular+++GO:0005886///plasma membrane	GO:0004930///G protein-coupled receptor activity	GO:0007166///cell surface receptor signaling pathway+++GO:0007416///synapse assembly+++GO:0031175///neuron projection development+++GO:0007613///memory+++GO:0007189///adenylate cyclase-activating G protein-coupled receptor signaling pathway+++GO:0032793///positive regulation of CREB transcription factor activity
304000	Igsf5	0	3	3	4	4	0	1	1	0.739659	0.312987	0.507954	04530///Tight junction	GO:0005923///bicellular tight junction+++GO:0016324///apical plasma membrane+++GO:0005886///plasma membrane+++GO:0016021///integral component of membrane+++GO:0030054///cell junction+++GO:0016020///membrane+++GO:0009986///cell surface		GO:0098609///cell-cell adhesion
305307	Cwh43	2	2	0	1	1	1	1	0	0.739659	0.475566	0.665502		GO:0016020///membrane+++GO:0016021///integral component of membrane		GO:0006506///GPI anchor biosynthetic process
367306	RGD1561755	0.83	0	0	1.27	0	0	0	1.26	0.739659	0.643816	0.797339	03060///Protein export	GO:0005634///nucleus+++GO:0005786///signal recognition particle, endoplasmic reticulum targeting	GO:0008312///7S RNA binding+++GO:0030942///endoplasmic reticulum signal peptide binding	GO:0042493///response to drug+++GO:0045047///protein targeting to ER+++GO:0006614///SRP-dependent cotranslational protein targeting to membrane
498036	Csnka2ip	1	0	2	2	1	0	0	2	0.739659	0.475566	0.665502		GO:0005634///nucleus
498300	LOC498300	2	2	0	1	1	1	0	1	0.739659	0.475566	0.665502	00600///Sphingolipid metabolism+++01100///Metabolic pathways+++04071///Sphingolipid signaling pathway	GO:0016021///integral component of membrane+++GO:0016020///membrane	GO:0042284///sphingolipid delta-4 desaturase activity	GO:0055114///oxidation-reduction process+++GO:0006629///lipid metabolic process+++GO:0046513///ceramide biosynthetic process
499277	RGD1560958	7	1	6	1	2	1	4	2	0.739659	0.216557	0.397851		GO:0016021///integral component of membrane+++GO:0016020///membrane
499765	Cfap77	3	1	0	1	2	0	1	0	0.739659	0.475566	0.665502		GO:0005929///cilium
64572	Vax2	1	0	1	3	1	0	1	1	0.739659	0.475566	0.665502		GO:0005737///cytoplasm+++GO:0005634///nucleus	GO:0003700///DNA-binding transcription factor activity+++GO:0001162///RNA polymerase II intronic transcription regulatory region sequence-specific DNA binding+++GO:0031490///chromatin DNA binding+++GO:0001227///DNA-binding transcription repressor activity, RNA polymerase II-specific+++GO:0043565///sequence-specific DNA binding+++GO:0003677///DNA binding	GO:0043010///camera-type eye development+++GO:0007275///multicellular organism development+++GO:0060041///retina development in camera-type eye+++GO:0006355///regulation of transcription, DNA-templated+++GO:0030900///forebrain development+++GO:0007409///axonogenesis+++GO:0016055///Wnt signaling pathway+++GO:0006357///regulation of transcription by RNA polymerase II+++GO:0009950///dorsal/ventral a…
685102	Nkx6-3	1	1	2	1	1	1	0	1	0.739659	0.475566	0.665502		GO:0005634///nucleus	GO:0043565///sequence-specific DNA binding+++GO:0003677///DNA binding	GO:0002067///glandular epithelial cell differentiation+++GO:0030857///negative regulation of epithelial cell differentiation+++GO:0006355///regulation of transcription, DNA-templated+++GO:0001709///cell fate determination
689108	Slc25a31	2	0	2	1	1	0	1	1	0.739659	0.475566	0.665502	04217///Necroptosis+++04022///cGMP-PKG signaling pathway+++04020///Calcium signaling pathway+++04218///Cellular senescence	GO:0016020///membrane+++GO:0016021///integral component of membrane+++GO:0005739///mitochondrion+++GO:0005743///mitochondrial inner membrane	GO:0005471///ATP:ADP antiporter activity+++GO:0022857///transmembrane transporter activity	GO:0055085///transmembrane transport+++GO:0015867///ATP transport+++GO:0015866///ADP transport
84475	Cxcr3	8	5	3	4	1	5	0	6	0.739659	0.153607	0.311832	04060///Cytokine-cytokine receptor interaction+++04062///Chemokine signaling pathway	GO:0005886///plasma membrane+++GO:0016021///integral component of membrane+++GO:0009986///cell surface+++GO:0009897///external side of plasma membrane+++GO:0016020///membrane	GO:0019956///chemokine binding+++GO:0016494///C-X-C chemokine receptor activity+++GO:0016493///C-C chemokine receptor activity+++GO:0004930///G protein-coupled receptor activity+++GO:0019958///C-X-C chemokine binding+++GO:0038023///signaling receptor activity+++GO:0019957///C-C chemokine binding+++GO:0004950///chemokine receptor activity	GO:1900118///negative regulation of execution phase of apoptosis+++GO:0045766///positive regulation of angiogenesis+++GO:0001525///angiogenesis+++GO:0060326///cell chemotaxis+++GO:0007166///cell surface receptor signaling pathway+++GO:0070098///chemokine-mediated signaling pathway+++GO:0006935///chemotaxis+++GO:0006955///immune response+++GO:0051281///positive regulation of release of sequestered…
102551737	LOC102551737	10	11	5	9	10	5	4	2	0.739659	0.0590773	0.154275
296500	Dlx1	20	17	23	10	6	12	15	9	0.739659	0.00759655	0.0294207		GO:0005634///nucleus	GO:0000977///RNA polymerase II regulatory region sequence-specific DNA binding+++GO:0043565///sequence-specific DNA binding+++GO:0003682///chromatin binding+++GO:0003677///DNA binding	GO:0009954///proximal/distal pattern formation+++GO:0021766///hippocampus development+++GO:0045746///negative regulation of Notch signaling pathway+++GO:0030154///cell differentiation+++GO:0021882///regulation of transcription from RNA polymerase II promoter involved in forebrain neuron fate commitment+++GO:0021892///cerebral cortex GABAergic interneuron differentiation+++GO:0030514///negative re…
498345	Tmprss11f	8	12	32	18	10	14	10	8	0.739659	0.00759655	0.0294207		GO:0005887///integral component of plasma membrane+++GO:0005576///extracellular region+++GO:0016021///integral component of membrane+++GO:0016020///membrane	GO:0008233///peptidase activity+++GO:0008236///serine-type peptidase activity+++GO:0004252///serine-type endopeptidase activity+++GO:0016787///hydrolase activity	GO:0006508///proteolysis
25239	Apod	19875	24987	40158	18965	10232	14373	21182	16748	0.736333	0	0		GO:0048471///perinuclear region of cytoplasm+++GO:0005615///extracellular space+++GO:0022626///cytosolic ribosome+++GO:0005576///extracellular region+++GO:0043025///neuronal cell body+++GO:0005783///endoplasmic reticulum+++GO:0005737///cytoplasm+++GO:0030425///dendrite	GO:0015485///cholesterol binding+++GO:0003674///molecular_function+++GO:0008289///lipid binding	GO:0006006///glucose metabolic process+++GO:0042308///negative regulation of protein import into nucleus+++GO:0048662///negative regulation of smooth muscle cell proliferation+++GO:2000405///negative regulation of T cell migration+++GO:0007568///aging+++GO:0000302///response to reactive oxygen species+++GO:0060588///negative regulation of lipoprotein lipid oxidation+++GO:0071638///negative regula…
100359752	LOC100359752	16	33	40	29	12	13	30	16	0.735589	0.000562036	0.00310801
100364500	LOC100364500	232.15	151.54	229.06	258.4	115.69	113.46	193.36	101.7	0.73547	7.19817e-21	2.68276e-19	04144///Endocytosis+++04218///Cellular senescence+++04612///Antigen processing and presentation+++04514///Cell adhesion molecules (CAMs)+++04145///Phagosome	GO:0042612///MHC class I protein complex+++GO:0016021///integral component of membrane+++GO:0016020///membrane		GO:0006955///immune response+++GO:0019882///antigen processing and presentation+++GO:0002474///antigen processing and presentation of peptide antigen via MHC class I+++GO:0002376///immune system process
294257	Cfb	94	104	192	85	62	68	91	65	0.734606	4.76415e-12	9.55086e-11	04610///Complement and coagulation cascades	GO:0016020///membrane+++GO:0005576///extracellular region+++GO:0005615///extracellular space	GO:0008233///peptidase activity+++GO:0004930///G protein-coupled receptor activity+++GO:0003674///molecular_function+++GO:0004252///serine-type endopeptidase activity+++GO:0016787///hydrolase activity+++GO:0008236///serine-type peptidase activity	GO:0006958///complement activation, classical pathway+++GO:0032496///response to lipopolysaccharide+++GO:0006956///complement activation+++GO:0006508///proteolysis+++GO:0097066///response to thyroid hormone+++GO:0007186///G protein-coupled receptor signaling pathway
108349608	LOC108349608	29.82	62.08	42.31	21	23.36	6	10.87	53.3	0.733414	7.95564e-05	0.00054074			GO:0008270///zinc ion binding+++GO:0003676///nucleic acid binding	GO:0016032///viral process
498241	RGD1564614	2.1	1.04	1.03	1.03	2.09	0	0	1.05	0.73044	0.471733	0.662158	04610///Complement and coagulation cascades	GO:0005615///extracellular space+++GO:0005886///plasma membrane+++GO:0005737///cytoplasm+++GO:0005634///nucleus	GO:0001851///complement component C3b binding+++GO:0043395///heparan sulfate proteoglycan binding+++GO:0008201///heparin binding	GO:0006956///complement activation+++GO:0045919///positive regulation of cytolysis+++GO:0030449///regulation of complement activation+++GO:0006957///complement activation, alternative pathway
361266	Akr1c12	9	23	17	21	9.57	6.11	14	12.6	0.730073	0.00830827	0.0317478			GO:0016229///steroid dehydrogenase activity+++GO:0016491///oxidoreductase activity+++GO:0047086///ketosteroid monooxygenase activity+++GO:0008106///alcohol dehydrogenase (NADP+) activity+++GO:0004032///alditol:NADP+ 1-oxidoreductase activity	GO:0008202///steroid metabolic process+++GO:0055114///oxidation-reduction process
689907	Ankrd61	11	11	8	13	8	8	2	8	0.728518	0.0389493	0.110814
[truncated: 22,440 more rows]
